# Supplementary material for: Structural color in Junonia butterflies evolves by tuning scale lamina thickness
Source: eLife. 2020 Apr 7;9:e52187. doi: 10.7554/eLife.52187 (PMC7138606; doi:10.7554/eLife.52187)
Supplement: Figure 3—source data 1. [file elife-52187-fig3-data1.xlsx]

## Sheet: Sheet1
	Absorbance
	J. coenia: wild-type vs artificially selected
	nm	WT cover mean	WT cover SD	AS cover mean	AS cover SD	F	p
	400	0.198657	0.0385876	0.194025	0.0370094	0.0583	0.8111
	500	0.162344	0.0461894	0.139968	0.0400408	1.0174	0.3223
	600	0.10612	0.0408973	0.0908631	0.0318607	0.479	0.495
	700	0.0862997	0.0325793	0.0722877	0.0239207	1.0402	0.317
	nm	WT ground mean	WT ground SD	AS ground mean	AS ground SD	F	p
	400	0.26305	0.0454705	0.325859	0.0696993	8.0136	0.008533	**
	500	0.245298	0.0553225	0.300026	0.065467	5.6567	0.02451	*
	600	0.171723	0.0499608	0.224994	0.0568397	7.1451	0.0124	*
	700	0.125962	0.0365537	0.178295	0.0460504	11.385	0.002183	**
	J. evarete
	nm	brown mean	brown SD	blue mean	blue SD
	400	0.306538	0.0196513	0.240274	0.0501063
	500	0.198625	0.0263175	0.144554	0.0380184
	600	0.100312	0.0264403	0.0826528	0.0260529
	700	0.0706914	0.0240944	0.0672977	0.0227904
	Figure 3—Source Data 1: Comparison of absorbance values for individual scales immersed in refractive index matched oil. Absorbances were compared using a mixed effects nested ANOVA (see Methods). Mean absorbances are reported with standard deviation (SD), F, and exact p-value for selected wavelengths. N=3 individuals and 15 scales for J. coenia, and N=1 individual and 6 scales per J. evarete samp…
