# Supplementary material for: Structural color in Junonia butterflies evolves by tuning scale lamina thickness
Source: eLife. 2020 Apr 7;9:e52187. doi: 10.7554/eLife.52187 (PMC7138606; doi:10.7554/eLife.52187)
Supplement: Figure 3—source data 2. [file elife-52187-fig3-data2.xlsx]

## Sheet: CAcover_n6
species	coenia	coenia	coenia	coenia	coenia	coenia	coenia	coenia	coenia	coenia	coenia	coenia	coenia	coenia	coenia	coenia	coenia	coenia	coenia	coenia	coenia	coenia	coenia	coenia	coenia	coenia	coenia	coenia	coenia	coenia	coenia	coenia	coenia	coenia	coenia	coenia	coenia	coenia	coenia	coenia	coenia	coenia	coenia	coenia	coenia	coenia	coenia	coenia	coenia
type	WT	WT	WT	WT	WT	WT	WT	WT	WT	WT	WT	WT	WT	WT	WT	WT	WT	WT	WT	WT	WT	WT	WT	WT	AS	AS	AS	AS	AS	AS	AS	AS	AS	AS	AS	AS	WT	WT	WT	WT	WT	WT	WT	WT	WT	WT	WT	WT	AS
scale_type	cover	cover	cover	cover	cover	cover	cover	cover	cover	cover	cover	cover	cover	cover	cover	cover	cover	cover	cover	cover	cover	cover	cover	cover	cover	cover	cover	cover	cover	cover	cover	cover	cover	cover	cover	cover	cover	cover	cover	cover	cover	cover	ground	ground	ground	ground	ground	ground	cover
individual	2	2	2	2	2	2	2	2	2	2	2	2	1	1	1	1	1	1	1	1	1	1	1	1	5	5	5	5	5	5	5	5	5	5	5	5	11	11	11	11	11	11	11	11	11	11	11	11	12
scale	4	4	5	5	6	6	1	1	2	2	3	3	4	4	5	5	6	6	1	1	2	2	3	3	4	4	5	5	6	6	1	1	2	2	3	3	7	7	8	8	9	9	7	7	8	8	9	9	7
technical_replicate	1	2	1	2	1	2	1	2	1	2	1	2	1	2	1	2	1	2	1	2	1	2	1	2	1	2	1	2	1	2	1	2	1	2	1	2	1	2	1	2	1	2	1	2	1	2	1	2	1
wl	WT_cover_i2_s4_1	WT_cover_i2_s4_2	WT_cover_i2_s5_1	WT_cover_i2_s5_2	WT_cover_i2_s6_1	WT_cover_i2_s6_2	WT_cover_i2_s1_1	WT_cover_i2_s1_2	WT_cover_i2_s2_1	WT_cover_i2_s2_2	WT_cover_i2_s3_1	WT_cover_i2_s3_2	WT_cover_i1_s4_1	WT_cover_i1_s4_2	WT_cover_i1_s5_1	WT_cover_i1_s5_2	WT_cover_i1_s6_1	WT_cover_i1_s6_2	WT_cover_i1_s1_1	WT_cover_i1_s1_2	NC_cover_s2_1	NC_cover_s2_2	NC_cover_s3_1	NC_cover_s3_2	AS_cover_s4_1	AS_cover_s4_2	AS_cover_s5_1	AS_cover_s5_2	AS_cover_s6_1	AS_cover_s6_2	AS_cover_s1_1	AS_cover_s1_2	AS_cover_s2_1	AS_cover_s2_2	AS_cover_s3_1	AS_cover_s3_2	coenia_CA_102_1_HW_cover_s1_Transmission_1	coenia_CA_102_1_HW_cover_s1_Transmission_2	coenia_CA_102_1_HW_cover_s2_Transmission_3	coenia_CA_102_1_HW_cover_s2_Transmission_4	coenia_CA_102_1_HW_cover_s3_Transmission_5	coenia_CA_102_1_HW_cover_s3_Transmission_6	coenia_CA_102_1_HW_ground_s1_Transmission_1	coenia_CA_102_1_HW_ground_s1_Transmission_2	coenia_CA_102_1_HW_ground_s1_Transmission_4	coenia_CA_102_1_HW_ground_s2_Transmission_1	coenia_CA_102_1_HW_ground_s2_Transmission_2	coenia_CA_102_1_HW_ground_s3_Transmission_3	coenia_FL_132_M_HW_cover_s1_Transmission_1
400	0.172871	0.17066	0.162315	0.183124	0.185996	0.172615	0.185942	0.177456	0.144972	0.136235	0.165339	0.158533	0.244558	0.249089	0.228646	0.233172	0.258187	0.262645	0.24259	0.238269	0.226244	0.219854	0.249389	0.246436	0.172224	0.165727	0.178489	0.185273	0.150935	0.153964	0.203453	0.215718	0.136527	0.144647	0.25491	0.242561	0.183502	0.1917	0.168567	0.156549	0.168925	0.175338	0.302005	0.351844	0.307427	0.330709	0.348926	0.312164	0.145425
401	0.172393	0.170216	0.16233	0.182724	0.185504	0.172396	0.184949	0.176738	0.144359	0.135521	0.165019	0.158236	0.244923	0.248979	0.228706	0.233289	0.258297	0.262727	0.242085	0.23791	0.226041	0.219945	0.249006	0.246193	0.171778	0.165387	0.178054	0.184595	0.149946	0.153077	0.203039	0.214633	0.135128	0.143019	0.254162	0.241535	0.183285	0.19176	0.167786	0.155929	0.168951	0.174977	0.302664	0.352264	0.307311	0.331734	0.349565	0.313046	0.144646
402	0.171916	0.169772	0.162339	0.182324	0.185014	0.172173	0.183968	0.176027	0.143749	0.134815	0.164696	0.157937	0.245277	0.248868	0.228761	0.233401	0.2584	0.262803	0.241582	0.237554	0.225837	0.22003	0.248624	0.245947	0.171332	0.165046	0.17762	0.183923	0.148967	0.152197	0.202623	0.213562	0.133749	0.141417	0.253421	0.240521	0.183069	0.191816	0.167018	0.155317	0.168972	0.174619	0.303307	0.352676	0.307194	0.332745	0.350191	0.313911	0.143876
403	0.171441	0.169329	0.162338	0.181925	0.184525	0.171947	0.182998	0.175321	0.143141	0.134116	0.164369	0.157632	0.245618	0.248756	0.22881	0.233507	0.258494	0.262872	0.241082	0.2372	0.225631	0.220107	0.248242	0.245698	0.170886	0.164702	0.177188	0.183257	0.147996	0.151325	0.202206	0.212506	0.132391	0.139842	0.252686	0.239518	0.182852	0.191867	0.166262	0.154712	0.168985	0.174264	0.303934	0.353078	0.307076	0.33374	0.350803	0.314757	0.143114
404	0.170966	0.168884	0.162325	0.181526	0.184035	0.171716	0.182041	0.17462	0.142535	0.133423	0.164038	0.157322	0.245945	0.248642	0.228853	0.233606	0.258578	0.262933	0.240583	0.236847	0.225425	0.220176	0.24786	0.245445	0.17044	0.164355	0.176759	0.182597	0.147034	0.15046	0.201785	0.211466	0.131053	0.138293	0.251957	0.238528	0.182636	0.191911	0.165519	0.154117	0.168991	0.173911	0.304541	0.353471	0.306955	0.334716	0.351401	0.315583	0.142358
405	0.170489	0.168437	0.1623	0.181127	0.183543	0.17148	0.181096	0.173923	0.141931	0.132738	0.163701	0.157005	0.246256	0.248525	0.228889	0.233697	0.25865	0.262985	0.240085	0.236497	0.225218	0.220237	0.247479	0.245188	0.169993	0.164003	0.176332	0.181945	0.146081	0.149602	0.201362	0.210443	0.129738	0.136773	0.251235	0.237551	0.182419	0.191947	0.16479	0.15353	0.168989	0.173562	0.305127	0.353852	0.306832	0.335672	0.351982	0.316388	0.141608
406	0.17001	0.167988	0.162259	0.180728	0.183048	0.171236	0.180165	0.173229	0.141327	0.132058	0.163357	0.15668	0.246548	0.248404	0.228917	0.233779	0.25871	0.263027	0.239589	0.236147	0.22501	0.220287	0.247098	0.244925	0.169545	0.163647	0.175908	0.181301	0.145136	0.148752	0.200936	0.209439	0.128444	0.135283	0.250521	0.236588	0.182201	0.191976	0.164074	0.152954	0.168977	0.173215	0.305689	0.354223	0.306706	0.336608	0.352545	0.317169	0.140865
407	0.169528	0.167534	0.162202	0.180328	0.182549	0.170985	0.179247	0.172539	0.140724	0.131386	0.163006	0.156344	0.246822	0.248279	0.228937	0.233851	0.258755	0.263057	0.239094	0.235799	0.224802	0.220327	0.246719	0.244657	0.169095	0.163284	0.175488	0.180664	0.144199	0.147908	0.200505	0.208453	0.127173	0.133823	0.249815	0.235639	0.181981	0.191995	0.163371	0.152388	0.168956	0.172871	0.306224	0.354581	0.306576	0.337519	0.35309	0.317925	0.140127
408	0.169041	0.167076	0.162125	0.179927	0.182043	0.170724	0.178343	0.171851	0.140121	0.130719	0.162646	0.155998	0.247074	0.24815	0.228948	0.233912	0.258783	0.263075	0.2386	0.235452	0.224592	0.220356	0.24634	0.244381	0.168643	0.162915	0.175071	0.180036	0.14327	0.147071	0.200071	0.207488	0.125926	0.132394	0.249116	0.234704	0.181761	0.192004	0.162683	0.151834	0.168923	0.172531	0.306731	0.354927	0.306443	0.338407	0.353615	0.318654	0.139393
409	0.168549	0.166612	0.162027	0.179525	0.181532	0.170453	0.177453	0.171164	0.139518	0.130058	0.162276	0.155639	0.247302	0.248015	0.22895	0.23396	0.258794	0.26308	0.238107	0.235105	0.224382	0.220372	0.245962	0.244098	0.168188	0.162537	0.174658	0.179418	0.142349	0.146241	0.199632	0.206544	0.124703	0.130997	0.248426	0.233785	0.181539	0.192001	0.16201	0.151292	0.168879	0.172193	0.307207	0.35526	0.306306	0.339267	0.354118	0.319355	0.138664
410	0.168054	0.166144	0.161911	0.179123	0.181015	0.170174	0.176577	0.17048	0.138915	0.129403	0.161898	0.155271	0.247511	0.247876	0.228943	0.233997	0.258789	0.263072	0.237614	0.23476	0.224171	0.220378	0.245585	0.243809	0.167732	0.162154	0.174248	0.178807	0.141436	0.145418	0.199189	0.205619	0.123502	0.129631	0.247744	0.232881	0.181315	0.191989	0.16135	0.15076	0.168824	0.171859	0.307656	0.355581	0.306164	0.340104	0.354601	0.320029	0.13794
411	0.167557	0.165675	0.161783	0.17872	0.180497	0.169889	0.175714	0.169801	0.138313	0.128755	0.161515	0.154896	0.247705	0.247735	0.228929	0.234026	0.258773	0.263057	0.237124	0.234417	0.22396	0.220375	0.245208	0.243515	0.167274	0.161766	0.17384	0.178203	0.140531	0.144603	0.198744	0.204711	0.122323	0.128292	0.247069	0.23199	0.181091	0.191969	0.160702	0.150237	0.168761	0.171527	0.308084	0.35589	0.30602	0.340922	0.355069	0.320681	0.137223
412	0.167059	0.165204	0.161643	0.178317	0.179977	0.169598	0.174863	0.169127	0.137713	0.128113	0.161128	0.154514	0.247882	0.247592	0.228909	0.234048	0.258747	0.263032	0.236635	0.234075	0.223748	0.220363	0.244831	0.243217	0.166816	0.161374	0.173433	0.177606	0.139634	0.143795	0.198296	0.203819	0.121163	0.126979	0.246401	0.231111	0.180866	0.191942	0.160066	0.149723	0.16869	0.171197	0.308491	0.356189	0.305873	0.341719	0.35552	0.321312	0.136513
413	0.166561	0.164732	0.16149	0.177914	0.179457	0.169302	0.174025	0.168457	0.137115	0.127478	0.160736	0.154127	0.248045	0.247446	0.228882	0.234063	0.25871	0.262999	0.236148	0.233734	0.223535	0.220343	0.244455	0.242916	0.166357	0.160979	0.173029	0.177015	0.138746	0.142994	0.197847	0.202943	0.120024	0.125692	0.245739	0.230245	0.18064	0.191908	0.159443	0.149217	0.168612	0.17087	0.308878	0.356476	0.305724	0.342497	0.355956	0.321921	0.13581
414	0.166063	0.164259	0.161327	0.177511	0.178936	0.169002	0.173197	0.167793	0.136519	0.126849	0.16034	0.153734	0.248194	0.247298	0.228849	0.23407	0.258663	0.262959	0.235663	0.233396	0.223322	0.220315	0.244079	0.24261	0.165898	0.160581	0.172626	0.176432	0.137866	0.142201	0.197395	0.202082	0.118904	0.12443	0.245084	0.229392	0.180414	0.191868	0.158831	0.148719	0.168525	0.170546	0.309245	0.356754	0.305573	0.343256	0.356376	0.32251	0.135114
415	0.165565	0.163785	0.161154	0.177109	0.178415	0.168697	0.172381	0.167132	0.135925	0.126227	0.159939	0.153336	0.248328	0.247148	0.22881	0.234071	0.258606	0.26291	0.23518	0.23306	0.223107	0.220278	0.243703	0.242301	0.165438	0.160179	0.172227	0.175855	0.136995	0.141415	0.19694	0.201236	0.117803	0.123192	0.244435	0.228549	0.180189	0.191822	0.158232	0.14823	0.168432	0.170225	0.309592	0.357021	0.305419	0.343996	0.356781	0.323077	0.134425
416	0.165067	0.163311	0.160971	0.176707	0.177895	0.168389	0.171576	0.166477	0.135333	0.125612	0.159535	0.152933	0.248449	0.246996	0.228766	0.234066	0.258541	0.262854	0.234698	0.232725	0.222892	0.220234	0.243328	0.241988	0.164979	0.159775	0.171829	0.175284	0.136133	0.140637	0.196484	0.200403	0.116721	0.121978	0.243792	0.227718	0.179963	0.19177	0.157645	0.147748	0.168331	0.169906	0.309921	0.357279	0.305264	0.344716	0.35717	0.323623	0.133742
417	0.164571	0.162836	0.160778	0.176306	0.177374	0.168077	0.170782	0.165826	0.134743	0.125004	0.159126	0.152526	0.248556	0.246842	0.228715	0.234055	0.258467	0.262791	0.234219	0.232393	0.222675	0.220183	0.242954	0.241672	0.164519	0.159368	0.171435	0.17472	0.13528	0.139866	0.196025	0.199584	0.115656	0.120786	0.243155	0.226898	0.179737	0.191713	0.15707	0.147275	0.168224	0.16959	0.31023	0.357527	0.305107	0.345417	0.357545	0.32415	0.133066
418	0.164076	0.162361	0.160577	0.175906	0.176855	0.167763	0.169997	0.16518	0.134156	0.124403	0.158714	0.152114	0.248651	0.246686	0.228659	0.234039	0.258385	0.262722	0.233741	0.232063	0.222457	0.220124	0.24258	0.241353	0.164059	0.158959	0.171043	0.174162	0.134437	0.139102	0.195564	0.198778	0.11461	0.119617	0.242524	0.226088	0.179512	0.191652	0.156508	0.146809	0.16811	0.169277	0.310522	0.357766	0.30495	0.3461	0.357905	0.324656	0.132397
419	0.163581	0.161884	0.160363	0.175507	0.176335	0.167444	0.169225	0.164538	0.13357	0.123808	0.158297	0.151695	0.248729	0.246527	0.228596	0.234014	0.258291	0.262642	0.233265	0.231735	0.222237	0.220055	0.242206	0.241028	0.163598	0.158544	0.170656	0.173611	0.133603	0.138346	0.1951	0.197987	0.113582	0.118473	0.241901	0.22529	0.179286	0.191584	0.155959	0.146352	0.167987	0.168967	0.310789	0.357994	0.304789	0.346759	0.358247	0.325138	0.131734
420	0.163082	0.161402	0.160131	0.175107	0.175811	0.167118	0.168465	0.163897	0.132985	0.12322	0.157872	0.151267	0.248787	0.246363	0.228525	0.233979	0.258183	0.26255	0.23279	0.231409	0.222016	0.219974	0.241833	0.240696	0.163134	0.158124	0.170272	0.173068	0.132777	0.137598	0.194632	0.197215	0.112577	0.117356	0.241285	0.224507	0.179059	0.191507	0.155424	0.145905	0.167853	0.168659	0.311027	0.35821	0.304625	0.347393	0.358569	0.325592	0.131076
421	0.162581	0.160918	0.159885	0.174708	0.175285	0.166785	0.167718	0.163259	0.132401	0.122639	0.15744	0.15083	0.248826	0.246195	0.228447	0.233935	0.258061	0.262447	0.232317	0.231085	0.221794	0.219883	0.241461	0.240358	0.162669	0.157697	0.169892	0.172533	0.13196	0.136856	0.19416	0.196459	0.111592	0.116266	0.240678	0.223737	0.178832	0.191422	0.154903	0.145469	0.167709	0.168355	0.311239	0.358415	0.304459	0.348001	0.358871	0.326019	0.130424
422	0.16208	0.160431	0.159626	0.17431	0.174757	0.166448	0.166983	0.162625	0.131819	0.122065	0.157004	0.150386	0.248849	0.246024	0.228361	0.233882	0.257928	0.262334	0.231845	0.230763	0.221571	0.219782	0.241089	0.240016	0.162202	0.157266	0.169515	0.172006	0.131152	0.136122	0.193686	0.195719	0.110626	0.115201	0.240077	0.222979	0.178604	0.19133	0.154395	0.145042	0.167557	0.168053	0.311427	0.358608	0.304289	0.348587	0.359156	0.326423	0.129778
423	0.161578	0.159944	0.159355	0.173912	0.174229	0.166106	0.166259	0.161996	0.131238	0.121497	0.156562	0.149936	0.248856	0.245851	0.228269	0.233823	0.257784	0.262212	0.231375	0.230442	0.221346	0.219672	0.240717	0.239669	0.161734	0.156831	0.169141	0.171485	0.130352	0.135395	0.193209	0.194993	0.109678	0.114159	0.239483	0.222233	0.178375	0.191232	0.153899	0.144623	0.167397	0.167754	0.311593	0.358791	0.304118	0.349152	0.359425	0.326803	0.129138
424	0.161077	0.159456	0.159076	0.173514	0.173701	0.165761	0.165545	0.161371	0.13066	0.120936	0.156118	0.149482	0.248851	0.245676	0.228172	0.233758	0.257633	0.262084	0.230907	0.230124	0.221121	0.219555	0.240346	0.239319	0.161267	0.156394	0.168769	0.17097	0.129561	0.134676	0.19273	0.19428	0.108748	0.113138	0.238895	0.221498	0.178147	0.191129	0.153414	0.144211	0.167231	0.167457	0.311742	0.358965	0.303944	0.349698	0.359679	0.327164	0.128505
425	0.160578	0.158968	0.158788	0.173117	0.173175	0.165412	0.164841	0.160752	0.130084	0.120381	0.15567	0.149026	0.248835	0.2455	0.22807	0.233688	0.257474	0.261951	0.230441	0.229808	0.220895	0.219432	0.239975	0.238966	0.1608	0.155955	0.168399	0.170461	0.12878	0.133964	0.192249	0.19358	0.107834	0.112138	0.238311	0.220771	0.177919	0.191021	0.152941	0.143807	0.167059	0.167163	0.311874	0.359129	0.30377	0.350227	0.359919	0.327505	0.127879
426	0.160082	0.158482	0.158495	0.17272	0.172651	0.165062	0.164146	0.160139	0.129511	0.119833	0.155221	0.148567	0.248809	0.245324	0.227963	0.233614	0.25731	0.261813	0.229978	0.229494	0.220668	0.219304	0.239605	0.238613	0.160334	0.155516	0.16803	0.169957	0.128007	0.13326	0.191768	0.19289	0.106935	0.111157	0.237733	0.220054	0.177692	0.19091	0.152477	0.143408	0.166882	0.166872	0.311994	0.359284	0.303595	0.350741	0.360147	0.32783	0.127261
427	0.159589	0.157998	0.158199	0.172324	0.172131	0.16471	0.163459	0.159533	0.128942	0.119291	0.154771	0.148109	0.248776	0.245149	0.227853	0.233538	0.257142	0.261672	0.229517	0.229182	0.22044	0.219171	0.239235	0.238258	0.159871	0.155077	0.167662	0.169459	0.127244	0.132563	0.191286	0.192209	0.10605	0.110193	0.237158	0.219344	0.177466	0.190796	0.152024	0.143015	0.166702	0.166583	0.312103	0.359432	0.303419	0.351241	0.360364	0.328141	0.126651
428	0.159101	0.157518	0.1579	0.171928	0.171615	0.164358	0.16278	0.158935	0.128376	0.118756	0.154321	0.147652	0.248738	0.244975	0.227739	0.233461	0.256971	0.261529	0.229059	0.228872	0.220211	0.219036	0.238866	0.237904	0.15941	0.154641	0.167294	0.168965	0.126491	0.131873	0.190804	0.191536	0.105178	0.109245	0.236586	0.218641	0.177241	0.19068	0.15158	0.142626	0.16652	0.166296	0.312203	0.359572	0.303244	0.351729	0.360572	0.328438	0.126049
429	0.15861	0.157031	0.157579	0.171532	0.171091	0.163996	0.162112	0.158338	0.12781	0.118227	0.153859	0.147183	0.248677	0.244796	0.227616	0.233372	0.256784	0.261374	0.228602	0.228563	0.21998	0.218889	0.2385	0.237542	0.158949	0.154197	0.166934	0.16848	0.125747	0.131189	0.190315	0.19088	0.104325	0.108322	0.23602	0.217947	0.177015	0.190555	0.151153	0.14225	0.166328	0.166014	0.312269	0.359702	0.303068	0.352188	0.360757	0.328704	0.125448
430	0.158107	0.156528	0.15722	0.171135	0.170551	0.163618	0.161458	0.157737	0.12724	0.117705	0.153375	0.146692	0.24858	0.244605	0.227479	0.233265	0.256568	0.261196	0.228141	0.228254	0.219746	0.218725	0.23814	0.237165	0.158484	0.153738	0.166588	0.16801	0.125014	0.130508	0.189813	0.190246	0.103493	0.107429	0.235464	0.217262	0.176789	0.190415	0.150749	0.141896	0.16612	0.165738	0.312278	0.359817	0.302888	0.352602	0.360908	0.328923	0.124844
431	0.157598	0.156014	0.156831	0.170737	0.169998	0.163227	0.160817	0.157134	0.126668	0.11719	0.152874	0.146185	0.248455	0.244407	0.227329	0.233143	0.25633	0.261	0.22768	0.227945	0.219508	0.218547	0.237784	0.236776	0.158015	0.153267	0.166252	0.167551	0.124291	0.129832	0.189303	0.189632	0.102682	0.106565	0.234915	0.216588	0.176561	0.190263	0.150365	0.141557	0.165899	0.165466	0.312242	0.35992	0.302707	0.35298	0.361032	0.329103	0.124239
432	0.157084	0.155494	0.156421	0.17034	0.169439	0.162828	0.160187	0.156532	0.126096	0.116681	0.152363	0.145667	0.248307	0.244203	0.227171	0.23301	0.256075	0.260791	0.22722	0.227638	0.219269	0.218357	0.237431	0.23638	0.157546	0.152789	0.165923	0.167102	0.123577	0.129162	0.188787	0.189034	0.101889	0.105726	0.234373	0.215924	0.176332	0.190102	0.149996	0.141231	0.165669	0.165199	0.312172	0.360011	0.302523	0.353328	0.361134	0.329252	0.123636
433	0.156571	0.154973	0.155999	0.169942	0.168878	0.162423	0.159567	0.155934	0.125526	0.116179	0.151846	0.145144	0.248145	0.243997	0.227006	0.232869	0.25581	0.260575	0.226761	0.227332	0.219028	0.218159	0.237079	0.23598	0.157076	0.152308	0.165597	0.166659	0.122872	0.128498	0.188267	0.188449	0.101113	0.104908	0.233837	0.21527	0.176103	0.189935	0.149641	0.140914	0.165431	0.164934	0.31208	0.360093	0.302338	0.353654	0.361218	0.329378	0.123039
434	0.15606	0.154453	0.155573	0.169545	0.168321	0.162017	0.158957	0.155344	0.12496	0.115683	0.15133	0.14462	0.247975	0.243792	0.226838	0.232726	0.25554	0.260354	0.226304	0.227029	0.218787	0.217956	0.236727	0.235578	0.156608	0.151826	0.165271	0.166222	0.122176	0.127843	0.187748	0.187875	0.100351	0.104108	0.233305	0.214625	0.175875	0.189765	0.149294	0.140602	0.165189	0.164671	0.311978	0.360165	0.302152	0.353966	0.361292	0.329489	0.12245
435	0.155556	0.153941	0.155152	0.169149	0.167773	0.161613	0.158354	0.154763	0.124398	0.115193	0.150819	0.144101	0.247803	0.243589	0.226668	0.232583	0.255272	0.260135	0.225852	0.226728	0.218547	0.217751	0.236372	0.23518	0.156142	0.151349	0.164941	0.165787	0.121488	0.127197	0.187233	0.187309	0.0996033	0.103323	0.232777	0.21399	0.175648	0.189594	0.148952	0.14029	0.164945	0.164409	0.311876	0.360229	0.301965	0.354272	0.36136	0.329592	0.121873
436	0.155063	0.153441	0.154745	0.168754	0.16724	0.161215	0.157758	0.154194	0.123842	0.114708	0.150319	0.143592	0.247637	0.243393	0.2265	0.232445	0.255012	0.259921	0.225406	0.226431	0.218308	0.217548	0.236015	0.234788	0.155679	0.15088	0.164604	0.165352	0.120809	0.126561	0.186723	0.186746	0.0988667	0.102549	0.232251	0.213364	0.175422	0.189425	0.148611	0.139976	0.164703	0.164148	0.311787	0.360287	0.301776	0.354578	0.361427	0.329694	0.121311
437	0.154582	0.152957	0.15436	0.168361	0.166725	0.160827	0.157168	0.153641	0.123295	0.11423	0.149836	0.143098	0.247484	0.243206	0.226336	0.232316	0.254766	0.259718	0.224966	0.226138	0.21807	0.217348	0.235652	0.234406	0.155222	0.150422	0.164256	0.164915	0.120136	0.125936	0.186223	0.186185	0.0981399	0.101784	0.231726	0.212747	0.175199	0.189261	0.148269	0.139654	0.164465	0.163885	0.311722	0.36034	0.301588	0.354893	0.3615	0.329805	0.120767
438	0.154094	0.152468	0.153951	0.167965	0.166204	0.160423	0.156602	0.153098	0.122748	0.113759	0.14935	0.142592	0.247307	0.243017	0.226165	0.232171	0.254499	0.2595	0.224529	0.225847	0.217841	0.217137	0.235288	0.234019	0.154758	0.149955	0.163901	0.164487	0.119467	0.125322	0.185724	0.185654	0.0974447	0.10106	0.231214	0.212157	0.17497	0.189081	0.147937	0.139346	0.164214	0.163624	0.311625	0.360367	0.301389	0.355182	0.361551	0.329882	0.120236
439	0.153579	0.151957	0.153475	0.167563	0.165653	0.15998	0.156073	0.152558	0.122193	0.113299	0.148841	0.142051	0.247075	0.242814	0.225975	0.231989	0.254181	0.259243	0.224092	0.225554	0.217621	0.216899	0.234928	0.233616	0.15428	0.149458	0.163544	0.164077	0.118798	0.124717	0.185219	0.185176	0.0967983	0.100404	0.230723	0.211606	0.174731	0.188867	0.147629	0.13907	0.163936	0.163365	0.311445	0.360352	0.301173	0.355413	0.361555	0.329886	0.119713
440	0.153044	0.151429	0.152949	0.167157	0.16508	0.159508	0.155574	0.152021	0.121633	0.112846	0.148317	0.141483	0.2468	0.242601	0.22577	0.231778	0.253824	0.258957	0.223655	0.225261	0.217408	0.21664	0.234569	0.233199	0.153791	0.148941	0.163185	0.163682	0.118132	0.124121	0.184708	0.18474	0.0961917	0.0998027	0.23025	0.211086	0.174485	0.188626	0.147339	0.138817	0.163637	0.163109	0.311201	0.360304	0.300943	0.355598	0.361522	0.329834	0.119197
441	0.152497	0.150891	0.15239	0.166748	0.164495	0.159015	0.155098	0.15149	0.121072	0.112402	0.147782	0.140898	0.246494	0.242382	0.225554	0.231547	0.25344	0.258651	0.22322	0.224969	0.2172	0.216365	0.234211	0.232774	0.153296	0.148409	0.162824	0.163299	0.117471	0.123534	0.184195	0.184335	0.0956161	0.0992431	0.229789	0.210591	0.174233	0.188367	0.147064	0.138582	0.163323	0.162855	0.310913	0.360231	0.300703	0.355748	0.361459	0.329738	0.118689
442	0.151946	0.15035	0.151812	0.166337	0.163905	0.158513	0.154637	0.150965	0.120511	0.111964	0.147242	0.140305	0.246168	0.24216	0.225332	0.231306	0.253041	0.258333	0.222788	0.224678	0.216994	0.21608	0.233853	0.232345	0.152798	0.14787	0.162461	0.162923	0.116815	0.122954	0.183681	0.183949	0.0950628	0.0987125	0.229337	0.210112	0.173979	0.188097	0.1468	0.138356	0.162999	0.162602	0.310599	0.360141	0.300458	0.355873	0.361377	0.329615	0.11819
443	0.151399	0.149813	0.151233	0.165928	0.16332	0.15801	0.154184	0.150446	0.119953	0.111531	0.146704	0.139712	0.245836	0.241939	0.225105	0.231061	0.252638	0.258012	0.222358	0.224389	0.216788	0.215791	0.233494	0.231915	0.152301	0.147332	0.162097	0.162551	0.116168	0.122384	0.183168	0.183573	0.0945231	0.0981982	0.228889	0.209642	0.173726	0.187824	0.146544	0.138135	0.162671	0.162351	0.310277	0.360042	0.300212	0.355986	0.361286	0.329478	0.117699
444	0.150863	0.149286	0.150668	0.16552	0.162749	0.157516	0.153733	0.149936	0.119402	0.111103	0.146174	0.139129	0.245509	0.241723	0.22488	0.230823	0.252245	0.257697	0.221932	0.224103	0.216579	0.215502	0.233133	0.231489	0.151809	0.146803	0.161732	0.16218	0.115531	0.121821	0.182658	0.183196	0.0939881	0.0976874	0.22844	0.209174	0.173475	0.187556	0.14629	0.137909	0.162345	0.162101	0.309967	0.359944	0.299968	0.356097	0.361193	0.329342	0.117218
445	0.150345	0.148777	0.150135	0.165115	0.162201	0.157041	0.153276	0.149434	0.11886	0.110679	0.145656	0.138565	0.245199	0.241515	0.224658	0.230599	0.251872	0.257397	0.221511	0.223821	0.216364	0.215219	0.232768	0.231071	0.151326	0.14629	0.161366	0.161806	0.114907	0.121266	0.182153	0.182806	0.0934494	0.0971677	0.227987	0.208701	0.17323	0.1873	0.146036	0.137673	0.162026	0.161851	0.309686	0.359853	0.29973	0.356217	0.361109	0.329222	0.116746
446	0.149854	0.148291	0.149648	0.164716	0.161683	0.156594	0.152805	0.148943	0.118329	0.110256	0.145158	0.138028	0.244918	0.241318	0.224445	0.230399	0.251532	0.257121	0.221095	0.223544	0.216141	0.214949	0.232399	0.230666	0.150856	0.1458	0.160999	0.161425	0.114296	0.120718	0.181654	0.182394	0.0928983	0.0966264	0.227525	0.208215	0.172994	0.187064	0.145777	0.13742	0.161721	0.161603	0.309455	0.359779	0.299503	0.356359	0.361043	0.329132	0.116283
447	0.149396	0.147836	0.149224	0.164323	0.161205	0.156184	0.152315	0.148462	0.117813	0.109836	0.144684	0.137528	0.244679	0.241137	0.224243	0.230232	0.251237	0.256879	0.220686	0.223272	0.215906	0.214695	0.232024	0.230278	0.150404	0.145341	0.160631	0.161034	0.1137	0.120178	0.181164	0.181947	0.0923262	0.0960511	0.22705	0.207708	0.172769	0.186856	0.14551	0.137143	0.161434	0.161354	0.309291	0.359729	0.299291	0.356532	0.361003	0.329087	0.115831
448	0.14898	0.147416	0.148859	0.163952	0.160783	0.15582	0.151828	0.148005	0.117317	0.109434	0.144244	0.137061	0.244474	0.240975	0.224057	0.230098	0.250984	0.25666	0.220297	0.223025	0.215672	0.214451	0.231646	0.229911	0.149958	0.144908	0.160264	0.160637	0.113123	0.119657	0.180687	0.181494	0.091765	0.0954782	0.226584	0.207217	0.17256	0.186676	0.145255	0.136853	0.161157	0.161112	0.309173	0.359689	0.299092	0.356724	0.360981	0.329066	0.115412
449	0.1486	0.147026	0.148531	0.163608	0.160416	0.155495	0.151368	0.147577	0.116839	0.109063	0.143835	0.136617	0.244285	0.240832	0.223886	0.229989	0.25076	0.25645	0.219935	0.222813	0.215449	0.214205	0.23127	0.229561	0.149509	0.14449	0.1599	0.160242	0.112564	0.11916	0.180222	0.181065	0.0912452	0.0949458	0.226147	0.206771	0.172368	0.186518	0.145032	0.136566	0.160877	0.160882	0.309066	0.359639	0.298902	0.356913	0.360958	0.329037	0.115042
450	0.148247	0.146659	0.148232	0.163285	0.160092	0.155199	0.150929	0.147172	0.116377	0.108715	0.14345	0.136189	0.244107	0.240702	0.223724	0.229899	0.250556	0.256247	0.219593	0.222627	0.215231	0.213957	0.230893	0.229225	0.149058	0.144083	0.159538	0.159847	0.112019	0.118684	0.179767	0.180651	0.0907564	0.0944439	0.225731	0.206359	0.172188	0.186374	0.144831	0.136282	0.160596	0.160661	0.308967	0.359581	0.298718	0.357097	0.360933	0.329003	0.114707
451	0.147914	0.146308	0.147952	0.162974	0.159796	0.154921	0.150502	0.146782	0.115924	0.108382	0.14308	0.135772	0.243935	0.240581	0.223567	0.22982	0.250365	0.256048	0.219264	0.222457	0.215016	0.213707	0.230516	0.228897	0.148607	0.143685	0.159177	0.159455	0.111487	0.118223	0.179317	0.180249	0.0902883	0.0939624	0.225326	0.205967	0.172016	0.18624	0.144646	0.135999	0.160312	0.160444	0.308874	0.359516	0.298537	0.357275	0.360905	0.328962	0.114397
452	0.14759	0.145966	0.147683	0.162667	0.159513	0.154652	0.15008	0.1464	0.115478	0.108055	0.142716	0.135362	0.243764	0.240463	0.223411	0.229744	0.25018	0.255851	0.218939	0.222291	0.2148	0.213454	0.230137	0.228571	0.148158	0.143293	0.158815	0.159064	0.110965	0.117771	0.17887	0.17985	0.0898307	0.0934915	0.224925	0.205583	0.171846	0.186109	0.144467	0.135716	0.160028	0.160229	0.308783	0.359448	0.298358	0.357446	0.360871	0.328915	0.114097
453	0.147268	0.145626	0.147415	0.162355	0.159229	0.154381	0.149657	0.146018	0.115033	0.107727	0.142351	0.134953	0.243588	0.240343	0.223249	0.229666	0.249993	0.255654	0.218612	0.222121	0.214578	0.213198	0.229754	0.228243	0.147714	0.142903	0.158451	0.158676	0.110451	0.117324	0.178423	0.179449	0.0893732	0.0930213	0.22452	0.205194	0.171674	0.185974	0.144286	0.135431	0.159743	0.160013	0.308694	0.359377	0.298177	0.357609	0.360832	0.328862	0.113795
454	0.146938	0.145281	0.147139	0.162031	0.158931	0.154097	0.149225	0.14563	0.114586	0.107389	0.141976	0.13454	0.243403	0.240217	0.223078	0.229577	0.249796	0.255455	0.218275	0.221935	0.214347	0.21294	0.229368	0.227908	0.147276	0.142512	0.158085	0.158289	0.109942	0.116876	0.177971	0.17904	0.0889058	0.0925418	0.224101	0.204789	0.171495	0.185832	0.144095	0.135143	0.159457	0.159792	0.308602	0.359306	0.297991	0.357762	0.360785	0.328805	0.11348
455	0.146592	0.144924	0.146847	0.161685	0.158604	0.153789	0.148777	0.145229	0.114131	0.107034	0.141582	0.134118	0.243203	0.240078	0.222892	0.22947	0.249581	0.255252	0.217921	0.221723	0.214102	0.21268	0.228976	0.227559	0.146847	0.142118	0.157716	0.157906	0.109436	0.116421	0.177511	0.178616	0.0884182	0.0920434	0.223661	0.204354	0.171306	0.185674	0.143887	0.134851	0.159172	0.159563	0.308505	0.359236	0.297799	0.357904	0.360728	0.328742	0.113139
456	0.146221	0.144548	0.146529	0.16131	0.158233	0.153449	0.148306	0.144806	0.113664	0.106653	0.141161	0.133682	0.242983	0.239922	0.222686	0.229339	0.249342	0.255042	0.217541	0.221476	0.21384	0.212416	0.228579	0.227193	0.146429	0.141717	0.157341	0.157525	0.108931	0.115955	0.177041	0.178171	0.0879004	0.0915163	0.223192	0.203877	0.1711	0.185497	0.143652	0.134553	0.158887	0.159322	0.308402	0.35917	0.297597	0.358034	0.360662	0.328674	0.11276
457	0.145857	0.144177	0.146216	0.16093	0.157864	0.15311	0.14783	0.144394	0.113205	0.106276	0.140731	0.133257	0.242769	0.239779	0.222482	0.229217	0.249116	0.254844	0.217164	0.221226	0.213568	0.212163	0.228188	0.226831	0.146029	0.141324	0.156967	0.157151	0.10844	0.115487	0.176568	0.177716	0.0873651	0.0909778	0.222709	0.203374	0.170904	0.185327	0.143424	0.134259	0.158617	0.159084	0.30832	0.359129	0.297413	0.358176	0.360602	0.328616	0.112371
458	0.145534	0.143834	0.14594	0.160569	0.157543	0.152809	0.147368	0.144023	0.112768	0.10593	0.140311	0.132866	0.242584	0.239674	0.222297	0.229136	0.248936	0.254671	0.216818	0.221007	0.213297	0.211929	0.227814	0.226493	0.14565	0.140954	0.156599	0.156786	0.107977	0.11503	0.1761	0.177264	0.0868314	0.0904506	0.222232	0.202869	0.17074	0.185193	0.143232	0.133977	0.158372	0.15886	0.308282	0.359128	0.297267	0.358346	0.360563	0.328577	0.112006
459	0.14524	0.143513	0.145691	0.160223	0.157256	0.152535	0.146916	0.143681	0.11235	0.105608	0.1399	0.1325	0.242418	0.239597	0.222126	0.229084	0.248791	0.254516	0.216495	0.220809	0.213024	0.211707	0.227451	0.226172	0.145288	0.140601	0.156235	0.15643	0.107536	0.114581	0.175637	0.176814	0.0862997	0.0899322	0.22176	0.202362	0.170598	0.185083	0.143069	0.133704	0.158146	0.158648	0.308275	0.359153	0.29715	0.358535	0.360537	0.328549	0.11166
460	0.144966	0.143206	0.145461	0.159884	0.156993	0.152277	0.146471	0.143359	0.111944	0.105302	0.139493	0.13215	0.242265	0.239537	0.221963	0.22905	0.248666	0.254373	0.216185	0.220624	0.212749	0.211494	0.227095	0.225863	0.144939	0.14026	0.155872	0.156078	0.107112	0.11414	0.175177	0.176365	0.08577	0.0894201	0.221288	0.201851	0.170471	0.184989	0.142922	0.133437	0.157931	0.158442	0.308288	0.359194	0.297049	0.358733	0.360517	0.328527	0.111325
461	0.144703	0.142908	0.145239	0.159546	0.15674	0.152026	0.146028	0.143047	0.111544	0.105003	0.139088	0.131809	0.242115	0.239485	0.221801	0.229023	0.248551	0.254236	0.21588	0.220442	0.21247	0.211283	0.22674	0.225556	0.144596	0.139926	0.15551	0.15573	0.1067	0.113705	0.174717	0.175915	0.0852424	0.0889121	0.220816	0.201338	0.170348	0.1849	0.142784	0.133171	0.15772	0.158237	0.308309	0.35924	0.296956	0.35893	0.360497	0.328504	0.110996
462	0.144439	0.142611	0.145017	0.159203	0.156485	0.151772	0.145584	0.142736	0.111145	0.104702	0.138682	0.131468	0.241959	0.239428	0.221634	0.22899	0.248431	0.254097	0.215571	0.220253	0.212186	0.211068	0.22638	0.225247	0.144257	0.139593	0.155145	0.155382	0.106295	0.113274	0.174256	0.175464	0.0847171	0.0884058	0.22034	0.200822	0.170222	0.184806	0.142644	0.132903	0.157507	0.158031	0.308324	0.359279	0.296858	0.359116	0.360468	0.328471	0.110667
463	0.144167	0.142308	0.144786	0.158849	0.156216	0.151503	0.145136	0.142414	0.11074	0.104391	0.138271	0.131119	0.24179	0.239358	0.221455	0.228942	0.248295	0.25395	0.21525	0.22005	0.211894	0.210844	0.226012	0.224927	0.143916	0.139256	0.154777	0.155034	0.105891	0.112846	0.173792	0.175009	0.0841941	0.0878989	0.219857	0.200303	0.170082	0.184698	0.142492	0.132629	0.157285	0.157817	0.308323	0.359299	0.296746	0.359281	0.360423	0.328423	0.110332
464	0.143875	0.141992	0.144536	0.158478	0.155921	0.15121	0.144677	0.142073	0.110325	0.104063	0.137854	0.130753	0.241598	0.239263	0.221259	0.228866	0.24813	0.253789	0.214908	0.219823	0.211594	0.210605	0.225629	0.22459	0.143569	0.13891	0.154403	0.154683	0.105484	0.112418	0.173324	0.17455	0.0836736	0.087389	0.219366	0.19978	0.169921	0.184566	0.142319	0.132347	0.157047	0.157593	0.308293	0.359289	0.296608	0.359414	0.360356	0.328353	0.109985
465	0.143554	0.141656	0.144259	0.158083	0.155587	0.150883	0.144206	0.141702	0.109893	0.103709	0.137426	0.130363	0.241375	0.239133	0.221038	0.22875	0.247922	0.253607	0.214536	0.219562	0.211285	0.210345	0.225226	0.224228	0.143211	0.13855	0.154021	0.154327	0.105067	0.11199	0.172849	0.174084	0.0831557	0.0868738	0.218864	0.199253	0.16973	0.184401	0.142116	0.132052	0.156786	0.157353	0.308222	0.359237	0.296435	0.359506	0.360259	0.328254	0.109621
466	0.143194	0.141294	0.143946	0.157658	0.155203	0.150512	0.143719	0.141293	0.109439	0.10332	0.136985	0.12994	0.241113	0.238958	0.220787	0.228585	0.247661	0.253397	0.214127	0.21926	0.210964	0.210059	0.224799	0.223836	0.142838	0.138171	0.15363	0.153964	0.104637	0.11156	0.172367	0.173612	0.0826405	0.0863511	0.218348	0.198722	0.1695	0.184192	0.141872	0.131742	0.156495	0.157094	0.308097	0.359132	0.296215	0.359546	0.360125	0.328118	0.109233
467	0.142827	0.140927	0.143619	0.157211	0.154791	0.150114	0.143223	0.140869	0.108979	0.102916	0.136539	0.129509	0.240836	0.238768	0.220515	0.228399	0.247374	0.25319	0.213696	0.218931	0.210646	0.209771	0.224368	0.223439	0.142468	0.137793	0.153243	0.153613	0.104219	0.111145	0.171887	0.173137	0.082128	0.0858201	0.217818	0.198185	0.169254	0.183965	0.141611	0.131424	0.156193	0.156836	0.307971	0.35902	0.295991	0.359571	0.35999	0.327981	0.10883
468	0.142486	0.140578	0.143304	0.156752	0.154384	0.149716	0.142729	0.14046	0.108529	0.102518	0.136097	0.129096	0.24057	0.238595	0.220237	0.228228	0.247096	0.253012	0.213264	0.2186	0.210342	0.209505	0.223956	0.223065	0.142121	0.137437	0.15287	0.153288	0.103839	0.110757	0.171417	0.172665	0.0816183	0.0852833	0.217279	0.197638	0.16902	0.183748	0.141362	0.131108	0.1559	0.156596	0.307892	0.358944	0.295805	0.359617	0.359887	0.327876	0.108425
469	0.142162	0.14024	0.142997	0.156283	0.153977	0.149315	0.142236	0.14006	0.108087	0.102123	0.135655	0.128694	0.240309	0.238431	0.219952	0.228064	0.246823	0.252854	0.21283	0.218263	0.210045	0.209251	0.223555	0.222704	0.141789	0.137098	0.152506	0.152983	0.103485	0.110391	0.170954	0.172194	0.0811112	0.0847428	0.21673	0.197084	0.168792	0.183535	0.141119	0.130793	0.155611	0.156369	0.307843	0.358889	0.295643	0.359674	0.359803	0.327788	0.108018
470	0.141847	0.139907	0.142693	0.155806	0.153568	0.14891	0.141741	0.139664	0.107647	0.101727	0.135214	0.128298	0.240048	0.23827	0.21966	0.2279	0.246548	0.252705	0.212391	0.217919	0.209751	0.209004	0.223157	0.222348	0.141467	0.136768	0.152148	0.152688	0.10315	0.110037	0.170494	0.171723	0.0806068	0.0842006	0.216175	0.196526	0.168565	0.183321	0.140877	0.130477	0.155322	0.156148	0.307807	0.358842	0.29549	0.35973	0.359724	0.327707	0.107609
471	0.141531	0.139575	0.142386	0.155323	0.153155	0.148498	0.141244	0.139266	0.107207	0.101327	0.134771	0.127901	0.239781	0.238104	0.219361	0.227729	0.246267	0.252556	0.211947	0.217567	0.209454	0.208754	0.222758	0.221991	0.141149	0.13644	0.151789	0.152396	0.102821	0.109689	0.170033	0.17125	0.080105	0.0836589	0.215615	0.195963	0.168333	0.183102	0.140632	0.130159	0.15503	0.155925	0.307769	0.358787	0.295334	0.359773	0.359638	0.327618	0.107198
472	0.141206	0.139238	0.142073	0.154834	0.152734	0.148077	0.140742	0.138861	0.106763	0.100919	0.134324	0.127497	0.239504	0.237925	0.219053	0.227546	0.245972	0.252398	0.211495	0.217206	0.209149	0.208494	0.222349	0.221622	0.140828	0.136109	0.151426	0.152098	0.10249	0.109339	0.169567	0.170773	0.0796058	0.0831198	0.215051	0.195399	0.168092	0.182871	0.140378	0.129837	0.154731	0.155695	0.307711	0.35871	0.295159	0.359795	0.359531	0.32751	0.106786
473	0.140864	0.138888	0.141748	0.154341	0.152302	0.147647	0.140234	0.138443	0.10631	0.100502	0.133873	0.127079	0.23921	0.237727	0.218737	0.227342	0.24566	0.25222	0.211033	0.216833	0.208828	0.208217	0.221923	0.221236	0.1405	0.135767	0.151052	0.151787	0.102147	0.10898	0.169093	0.170292	0.0791092	0.0825853	0.214485	0.194834	0.167836	0.182624	0.14011	0.129508	0.154421	0.155451	0.307616	0.358597	0.294952	0.359782	0.35939	0.327369	0.106373
474	0.140495	0.138522	0.141407	0.153846	0.151856	0.147204	0.139719	0.138007	0.105845	0.10007	0.133414	0.126641	0.238894	0.237501	0.218412	0.227111	0.245325	0.252012	0.21056	0.216446	0.208489	0.207915	0.221475	0.220822	0.140158	0.135407	0.150664	0.151455	0.101782	0.108603	0.168607	0.169805	0.0786152	0.0820576	0.21392	0.194272	0.167559	0.182354	0.139825	0.129173	0.154096	0.155185	0.307468	0.358433	0.2947	0.359725	0.359203	0.327184	0.105957
475	0.140091	0.138132	0.141045	0.15335	0.151395	0.146748	0.139195	0.137547	0.105365	0.0996219	0.132948	0.126176	0.238551	0.237242	0.218078	0.226847	0.244961	0.251764	0.210073	0.216046	0.208123	0.207579	0.220997	0.220374	0.139795	0.135024	0.150256	0.151092	0.101385	0.108203	0.168105	0.16931	0.0781237	0.0815386	0.213356	0.193712	0.167258	0.182058	0.139517	0.128828	0.153752	0.154891	0.307251	0.358203	0.294389	0.359612	0.358956	0.326941	0.105541
476	0.139659	0.137734	0.140667	0.152843	0.150915	0.146276	0.138665	0.137071	0.10487	0.0991495	0.132477	0.125693	0.238184	0.23696	0.217729	0.226559	0.244572	0.2515	0.209573	0.215629	0.207737	0.207218	0.220492	0.219897	0.139425	0.134631	0.149836	0.150715	0.100978	0.107796	0.167596	0.168815	0.07764	0.0810255	0.21279	0.19316	0.166937	0.18174	0.139185	0.128474	0.153394	0.154585	0.306999	0.357938	0.294041	0.359467	0.358675	0.326672	0.105112
477	0.139214	0.137344	0.140282	0.152317	0.150418	0.145789	0.138131	0.136587	0.104367	0.098652	0.132006	0.125201	0.237799	0.236671	0.217362	0.226261	0.244169	0.251248	0.209059	0.215197	0.207339	0.206842	0.219971	0.219405	0.139061	0.134246	0.149414	0.150342	0.100587	0.107405	0.167093	0.168324	0.0771679	0.080514	0.212218	0.192615	0.166603	0.181411	0.138835	0.128111	0.153029	0.154283	0.306753	0.357675	0.293687	0.359319	0.358393	0.326409	0.104664
478	0.138757	0.13696	0.13989	0.151775	0.149907	0.145291	0.137595	0.136097	0.103857	0.0981345	0.131535	0.124701	0.2374	0.236375	0.216979	0.225952	0.243752	0.251002	0.208535	0.214751	0.20693	0.206454	0.219436	0.218898	0.138703	0.133865	0.14899	0.14997	0.100207	0.107024	0.166591	0.167837	0.0767046	0.0800042	0.211641	0.192074	0.16626	0.18107	0.138469	0.12774	0.152658	0.153984	0.306509	0.357409	0.293324	0.359164	0.358105	0.326148	0.1042
479	0.138289	0.136576	0.139493	0.151222	0.149385	0.144782	0.137054	0.135599	0.103341	0.0976022	0.131063	0.124195	0.236986	0.23607	0.216582	0.225633	0.243321	0.250756	0.208	0.214294	0.206511	0.206055	0.218888	0.218378	0.138347	0.133487	0.148563	0.149598	0.0998331	0.10665	0.16609	0.16735	0.0762474	0.0794961	0.21106	0.191536	0.165907	0.180718	0.138091	0.127363	0.15228	0.153683	0.306261	0.357135	0.29295	0.358997	0.357807	0.325882	0.103726
480	0.137814	0.136191	0.139089	0.150659	0.148854	0.144263	0.136511	0.135096	0.102821	0.0970604	0.130587	0.123683	0.236561	0.235756	0.216176	0.225302	0.242879	0.250505	0.207458	0.213826	0.206083	0.205646	0.21833	0.217849	0.137991	0.133107	0.148132	0.149225	0.0994619	0.106278	0.165586	0.166862	0.0757936	0.07899	0.210474	0.190997	0.165545	0.180355	0.137704	0.126981	0.151897	0.153379	0.306002	0.356847	0.292565	0.358813	0.357496	0.325606	0.103246
481	0.137333	0.135802	0.13868	0.150092	0.148317	0.143738	0.135963	0.134586	0.102298	0.0965141	0.130109	0.123166	0.236124	0.235431	0.215761	0.224959	0.242426	0.250245	0.206909	0.21335	0.205647	0.205229	0.217764	0.21731	0.137633	0.132723	0.147696	0.148846	0.0990887	0.105904	0.165078	0.166371	0.0753407	0.0784857	0.209885	0.190455	0.165175	0.179982	0.137309	0.126595	0.151507	0.153067	0.305728	0.356541	0.292165	0.35861	0.357166	0.325312	0.102766
482	0.136847	0.135404	0.138267	0.149524	0.147776	0.143207	0.135411	0.13407	0.101775	0.0959685	0.129625	0.122645	0.235679	0.235094	0.215341	0.224603	0.241964	0.249969	0.206356	0.212867	0.205204	0.204804	0.217191	0.216764	0.137271	0.132332	0.147253	0.148462	0.0987089	0.105524	0.164564	0.165875	0.0748859	0.0779835	0.209292	0.189908	0.164799	0.1796	0.136911	0.126205	0.151111	0.152746	0.305432	0.356211	0.291749	0.358381	0.356815	0.324995	0.10229
483	0.136359	0.134994	0.13785	0.148957	0.147234	0.142672	0.134856	0.133549	0.101253	0.0954287	0.129137	0.12212	0.235227	0.234744	0.214918	0.224235	0.241492	0.249673	0.2058	0.212379	0.204755	0.204373	0.216615	0.216213	0.136902	0.13193	0.146804	0.148069	0.0983183	0.105134	0.164041	0.16537	0.0744267	0.0774833	0.208697	0.189353	0.164417	0.179208	0.136512	0.125814	0.15071	0.152412	0.305109	0.355853	0.291314	0.358123	0.356437	0.324649	0.101822
484	0.135869	0.134571	0.137429	0.148397	0.146693	0.142135	0.134296	0.133021	0.100733	0.0948996	0.128641	0.121593	0.234769	0.23438	0.214496	0.223853	0.241013	0.249352	0.205241	0.211887	0.204301	0.203937	0.216036	0.215658	0.136525	0.131516	0.146346	0.147665	0.0979123	0.104729	0.163507	0.164857	0.0739604	0.0769853	0.2081	0.188788	0.16403	0.178808	0.136115	0.125422	0.150302	0.152062	0.304753	0.355461	0.29086	0.357832	0.356029	0.324268	0.101368
485	0.135381	0.134129	0.137006	0.147845	0.146156	0.141598	0.133731	0.132488	0.100217	0.0943865	0.128139	0.121063	0.234307	0.234001	0.214076	0.223457	0.240527	0.249	0.204683	0.211393	0.203842	0.203498	0.215458	0.215102	0.136136	0.131086	0.14588	0.14725	0.0974867	0.104306	0.16296	0.164331	0.0734844	0.0764895	0.207501	0.18821	0.163639	0.178399	0.135723	0.12503	0.149889	0.151694	0.304359	0.355031	0.290384	0.357503	0.355587	0.323845	0.100932
486	0.134882	0.133672	0.13658	0.147292	0.145614	0.141051	0.133169	0.131952	0.0997038	0.0938758	0.127636	0.120525	0.233831	0.233604	0.213657	0.22304	0.240027	0.248624	0.20412	0.210892	0.203374	0.203049	0.21487	0.214536	0.135746	0.130644	0.145403	0.146829	0.0970535	0.103875	0.162414	0.163806	0.0730083	0.0760044	0.206907	0.187631	0.163233	0.17797	0.13532	0.124638	0.149465	0.151305	0.303926	0.354564	0.289881	0.357136	0.355113	0.323382	0.100501
487	0.134361	0.133207	0.136153	0.146726	0.145059	0.140487	0.132614	0.131414	0.0991913	0.0933529	0.127137	0.119973	0.23333	0.23319	0.213237	0.222598	0.239508	0.248236	0.203547	0.210378	0.202893	0.202584	0.214263	0.213955	0.135365	0.130195	0.144917	0.14641	0.0966261	0.103449	0.161879	0.163291	0.0725414	0.0755353	0.20632	0.187063	0.162802	0.177514	0.134891	0.124243	0.149027	0.150897	0.303461	0.354067	0.28935	0.356735	0.354612	0.322884	0.100058
488	0.133822	0.132733	0.135723	0.14615	0.144493	0.139908	0.132061	0.130873	0.0986785	0.0928206	0.126641	0.11941	0.232809	0.232759	0.212813	0.222135	0.238971	0.247836	0.202964	0.209852	0.2024	0.202106	0.213641	0.21336	0.134987	0.129741	0.144422	0.145992	0.0962018	0.103025	0.161351	0.162782	0.0720808	0.0750775	0.205737	0.1865	0.162352	0.177036	0.134443	0.123847	0.148576	0.150474	0.302967	0.353544	0.288797	0.356305	0.354088	0.322356	0.0996089
489	0.133271	0.132252	0.135289	0.145566	0.143917	0.139318	0.131509	0.130327	0.0981644	0.0922819	0.126144	0.118837	0.232272	0.232315	0.212385	0.221655	0.238421	0.247423	0.202373	0.209314	0.201897	0.201616	0.213006	0.212754	0.134611	0.129281	0.14392	0.145572	0.0957777	0.102602	0.160825	0.162274	0.0716232	0.0746266	0.205155	0.185939	0.161888	0.176541	0.133982	0.123447	0.148115	0.150037	0.30245	0.352998	0.288224	0.355847	0.353541	0.321803	0.0991558
490	0.132712	0.131764	0.13485	0.144977	0.143335	0.13872	0.130954	0.129774	0.0976482	0.0917396	0.125644	0.118259	0.231724	0.231858	0.211951	0.22116	0.237859	0.246999	0.201776	0.208768	0.201386	0.201117	0.212363	0.212139	0.134232	0.128815	0.143413	0.145148	0.0953511	0.102177	0.160295	0.161764	0.0711658	0.074178	0.204569	0.185375	0.161415	0.176035	0.133513	0.123044	0.147647	0.149591	0.301913	0.352432	0.287635	0.355367	0.352976	0.32123	0.0987025
491	0.132149	0.13127	0.134404	0.144385	0.142747	0.138117	0.130392	0.129214	0.0971289	0.0911967	0.125137	0.117677	0.231169	0.231391	0.211509	0.220656	0.237289	0.246563	0.201172	0.208212	0.200868	0.200611	0.211715	0.211517	0.133847	0.128344	0.142901	0.144718	0.0949192	0.101747	0.159756	0.161245	0.0707056	0.0737272	0.203978	0.184803	0.160938	0.175524	0.133043	0.122637	0.147173	0.149139	0.301361	0.351849	0.287034	0.354868	0.352393	0.32064	0.0982524
492	0.131587	0.130772	0.133951	0.143794	0.142157	0.137513	0.129821	0.128645	0.0966056	0.090656	0.124622	0.117095	0.230612	0.230917	0.21106	0.220145	0.236713	0.246116	0.200563	0.20765	0.200345	0.200101	0.211065	0.210891	0.133453	0.127867	0.142385	0.14428	0.0944792	0.10131	0.159203	0.160714	0.0702395	0.0732698	0.203377	0.18422	0.160461	0.175013	0.132577	0.122226	0.146697	0.148683	0.300797	0.351254	0.286425	0.354352	0.351796	0.32004	0.0978091
493	0.13103	0.130269	0.133488	0.143205	0.141567	0.13691	0.129236	0.128064	0.0960774	0.0901204	0.124095	0.116515	0.230055	0.230436	0.210602	0.219632	0.236133	0.245658	0.199951	0.207081	0.19982	0.199587	0.210416	0.210262	0.133045	0.127384	0.141869	0.143832	0.0940283	0.100864	0.158631	0.160167	0.0697646	0.0728013	0.202762	0.183621	0.159989	0.174507	0.132122	0.12181	0.146221	0.148226	0.300227	0.350648	0.285811	0.353823	0.351187	0.319433	0.0973758
494	0.130482	0.129762	0.133015	0.142622	0.140977	0.136313	0.128635	0.127472	0.0955436	0.0895927	0.123554	0.115939	0.229504	0.229951	0.210133	0.219119	0.235553	0.245188	0.199337	0.206507	0.199293	0.199073	0.209772	0.209634	0.13262	0.126897	0.141351	0.143371	0.0935636	0.100407	0.158035	0.1596	0.0692778	0.0723172	0.202132	0.183002	0.159528	0.174011	0.131682	0.12139	0.145747	0.147772	0.299653	0.350035	0.285198	0.353286	0.350568	0.318824	0.0969561
495	0.129945	0.129251	0.132539	0.142048	0.140391	0.135716	0.128034	0.126877	0.095016	0.089079	0.123017	0.115374	0.228952	0.229455	0.209658	0.2186	0.234966	0.244705	0.198717	0.205929	0.198771	0.198562	0.209136	0.209002	0.132191	0.126405	0.140831	0.142906	0.0930954	0.0999487	0.15743	0.159025	0.0687962	0.0718363	0.201505	0.182379	0.159068	0.173521	0.131256	0.120973	0.145276	0.147317	0.299051	0.34939	0.284569	0.352721	0.349924	0.318193	0.0965598
496	0.129413	0.128733	0.132067	0.141484	0.139805	0.135113	0.127449	0.126288	0.0945039	0.0885806	0.122501	0.114823	0.22839	0.228942	0.209184	0.218063	0.234365	0.244204	0.19809	0.205347	0.198257	0.198056	0.208505	0.208363	0.131768	0.125909	0.140305	0.142446	0.0926334	0.0994999	0.156829	0.158457	0.0683345	0.0713761	0.200899	0.181768	0.158599	0.173026	0.130837	0.120564	0.144803	0.146855	0.298397	0.348693	0.283911	0.352115	0.349244	0.317523	0.09619
497	0.128885	0.128209	0.131595	0.140925	0.139218	0.134503	0.126874	0.125701	0.0940019	0.0880927	0.121998	0.114279	0.227818	0.228413	0.208707	0.21751	0.23375	0.243688	0.197454	0.204759	0.197747	0.197552	0.207876	0.207715	0.131348	0.125408	0.139774	0.141986	0.0921745	0.0990565	0.15623	0.157893	0.067887	0.0709307	0.200308	0.181163	0.15812	0.172525	0.13042	0.120161	0.144329	0.146388	0.297701	0.347953	0.283229	0.351472	0.348532	0.316819	0.0958397
498	0.128356	0.127679	0.13112	0.140369	0.138628	0.133888	0.126303	0.125113	0.0935049	0.0876103	0.121502	0.113739	0.227237	0.227869	0.208225	0.216943	0.233123	0.243156	0.196811	0.204164	0.197236	0.197045	0.207246	0.20706	0.130928	0.124903	0.139238	0.141524	0.0917155	0.0986148	0.155629	0.157329	0.0674479	0.0704939	0.199722	0.18056	0.157633	0.172018	0.130005	0.11976	0.143851	0.145913	0.296973	0.347178	0.282526	0.3508	0.347795	0.316087	0.0955021
499	0.127823	0.127141	0.13064	0.139812	0.138034	0.133266	0.12573	0.12452	0.0930076	0.0871289	0.121005	0.113197	0.226648	0.227312	0.207737	0.216363	0.232485	0.242612	0.196161	0.203561	0.196721	0.196531	0.206612	0.206396	0.130505	0.124392	0.138696	0.141058	0.0912532	0.098171	0.155023	0.15676	0.0670114	0.0700598	0.199136	0.179954	0.157139	0.171504	0.129588	0.119357	0.143369	0.145431	0.296221	0.34638	0.281807	0.350103	0.347037	0.315334	0.0951704
500	0.127285	0.126596	0.130152	0.13925	0.137433	0.132638	0.125149	0.123918	0.0925049	0.0866436	0.120499	0.112648	0.22605	0.226743	0.207241	0.215772	0.231837	0.242055	0.195504	0.202948	0.196196	0.196009	0.205969	0.205724	0.130074	0.123874	0.138149	0.140583	0.0907844	0.0977213	0.154408	0.156184	0.0665718	0.0696223	0.198542	0.17934	0.156639	0.170983	0.129166	0.118949	0.142881	0.144943	0.295456	0.345565	0.281076	0.349387	0.346264	0.314566	0.0948377
501	0.126738	0.126044	0.129653	0.138679	0.136823	0.132003	0.124555	0.123305	0.0919916	0.0861499	0.119979	0.112088	0.225445	0.226165	0.206733	0.215172	0.231179	0.241487	0.19484	0.202324	0.195658	0.195473	0.205314	0.205043	0.129633	0.12335	0.137597	0.140098	0.0903061	0.0972619	0.153781	0.155595	0.0661233	0.0691756	0.197932	0.178714	0.156135	0.170453	0.128737	0.118533	0.142385	0.144447	0.294686	0.344744	0.280337	0.348659	0.345481	0.313788	0.0944971
502	0.126179	0.125485	0.129139	0.138096	0.136204	0.131361	0.123941	0.122676	0.0914626	0.0856429	0.119436	0.111512	0.224832	0.225578	0.206214	0.214562	0.230513	0.240909	0.19417	0.201687	0.195103	0.194921	0.204645	0.204354	0.129179	0.122818	0.137041	0.139599	0.0898151	0.096789	0.153139	0.154991	0.0656603	0.0687137	0.1973	0.178072	0.155626	0.169913	0.128299	0.118105	0.141881	0.143943	0.293921	0.343925	0.279595	0.347925	0.344693	0.313007	0.094142
503	0.125604	0.124917	0.128608	0.137498	0.135572	0.130711	0.123303	0.122029	0.0909127	0.085118	0.118865	0.110915	0.224213	0.224985	0.205679	0.213946	0.229841	0.240323	0.193493	0.201035	0.194526	0.194349	0.203957	0.203656	0.128707	0.122278	0.13648	0.139083	0.0893081	0.0962988	0.152477	0.154367	0.065177	0.0682308	0.196638	0.177408	0.155114	0.169364	0.127847	0.117662	0.141368	0.143432	0.293171	0.343117	0.278852	0.347189	0.343906	0.312228	0.0937655
504	0.125012	0.124342	0.128057	0.13688	0.134926	0.130055	0.122635	0.121359	0.0903369	0.0845706	0.118257	0.110292	0.223587	0.224386	0.205127	0.213324	0.229162	0.239729	0.192811	0.200367	0.193924	0.193753	0.203247	0.20295	0.128215	0.121729	0.135915	0.138548	0.0887821	0.0957875	0.151793	0.15372	0.0646679	0.0677208	0.195939	0.176718	0.154599	0.168805	0.127381	0.117201	0.140842	0.142913	0.292444	0.34233	0.278115	0.346459	0.343123	0.311457	0.0933609
505	0.124418	0.123769	0.1275	0.136264	0.134283	0.129402	0.121956	0.120685	0.0897564	0.0840226	0.117638	0.10967	0.222967	0.223787	0.204573	0.212703	0.228486	0.239134	0.192138	0.199693	0.193313	0.193155	0.202534	0.202247	0.127722	0.121184	0.135357	0.138006	0.0882451	0.0952668	0.151096	0.153068	0.0641515	0.0672086	0.19523	0.176022	0.154088	0.168237	0.126911	0.116726	0.140308	0.142392	0.291727	0.341554	0.277375	0.345723	0.342337	0.31068	0.0929593
506	0.123837	0.123203	0.12695	0.135669	0.133655	0.12876	0.121286	0.120021	0.0891909	0.0834936	0.117034	0.10907	0.22236	0.223192	0.204027	0.212085	0.227816	0.238541	0.191482	0.199022	0.192712	0.192572	0.201834	0.201557	0.127245	0.120651	0.134813	0.137472	0.0877063	0.0947487	0.150398	0.152426	0.0636469	0.0667175	0.194538	0.175339	0.153583	0.167663	0.126447	0.116243	0.139769	0.141873	0.290999	0.340774	0.276625	0.344968	0.341536	0.30988	0.0925893
507	0.123262	0.122641	0.126402	0.135086	0.133036	0.128124	0.120619	0.119362	0.0886338	0.0829763	0.116437	0.108484	0.221759	0.222595	0.203484	0.211467	0.227148	0.237946	0.190837	0.19835	0.192115	0.191996	0.201141	0.200874	0.126777	0.120126	0.134278	0.136939	0.0871639	0.0942302	0.149695	0.15179	0.0631487	0.0662395	0.193854	0.174662	0.153079	0.167083	0.125987	0.115753	0.139224	0.141353	0.290261	0.339987	0.275865	0.344197	0.340719	0.30906	0.0922403
508	0.122689	0.122078	0.125852	0.134508	0.13242	0.127488	0.119951	0.118701	0.0880783	0.0824631	0.115839	0.107902	0.221159	0.221993	0.20294	0.210843	0.226477	0.237345	0.190195	0.197673	0.191515	0.191421	0.200448	0.200191	0.12631	0.119601	0.133745	0.136404	0.0866164	0.0937081	0.148986	0.151152	0.0626518	0.0657667	0.19317	0.173985	0.152576	0.166496	0.125526	0.115257	0.138674	0.140831	0.289513	0.33919	0.275094	0.343408	0.339887	0.308224	0.0919021
509	0.12211	0.12151	0.125295	0.133926	0.131798	0.126847	0.119274	0.118033	0.0875179	0.0819466	0.115233	0.107315	0.220553	0.221382	0.202388	0.210211	0.225798	0.236734	0.189548	0.196988	0.190907	0.190838	0.199748	0.199502	0.125838	0.119073	0.133208	0.135861	0.086062	0.0931792	0.148268	0.150507	0.062151	0.0652913	0.192478	0.1733	0.152068	0.165902	0.125061	0.114756	0.138118	0.140302	0.288753	0.33838	0.274314	0.342604	0.33904	0.307375	0.0915642
510	0.12152	0.120932	0.124726	0.133334	0.131165	0.126197	0.118584	0.117351	0.0869458	0.0814195	0.114611	0.106713	0.219934	0.220759	0.201824	0.209566	0.225106	0.236109	0.188891	0.196292	0.190285	0.190238	0.199035	0.198801	0.125353	0.118534	0.132663	0.135306	0.085499	0.0926404	0.147539	0.149849	0.0616411	0.0648053	0.19177	0.172601	0.151553	0.165301	0.12459	0.11425	0.137557	0.139765	0.287984	0.337554	0.273523	0.341784	0.33818	0.306516	0.0912163
511	0.120914	0.120339	0.124141	0.132723	0.130515	0.125532	0.117874	0.11665	0.0863555	0.0808742	0.113967	0.106087	0.219298	0.220119	0.201242	0.208904	0.224396	0.235466	0.188214	0.195582	0.189642	0.189616	0.198302	0.198081	0.124849	0.11798	0.132102	0.134733	0.0849258	0.0920886	0.146797	0.149171	0.0611171	0.064301	0.191039	0.171882	0.151029	0.164692	0.124109	0.11374	0.136991	0.139216	0.287203	0.336711	0.272722	0.34095	0.337306	0.30565	0.090848
512	0.120285	0.119727	0.123535	0.132086	0.129839	0.124848	0.11714	0.115923	0.0857403	0.0803036	0.113293	0.105427	0.218637	0.219459	0.200637	0.208221	0.223664	0.234801	0.187512	0.194854	0.188974	0.188961	0.197542	0.197337	0.124317	0.117404	0.131521	0.134138	0.0843407	0.0915205	0.146039	0.148467	0.0605737	0.0637705	0.190276	0.171136	0.150492	0.164074	0.123614	0.113226	0.136419	0.138653	0.286412	0.335846	0.271912	0.340102	0.33642	0.304782	0.0904491
513	0.119628	0.119091	0.122904	0.131414	0.129131	0.124139	0.116375	0.115165	0.0850939	0.0797004	0.112581	0.104726	0.217945	0.218774	0.200004	0.207513	0.222906	0.23411	0.186776	0.194104	0.188273	0.188268	0.196748	0.196562	0.123752	0.116801	0.130913	0.133517	0.083742	0.0909331	0.145264	0.147733	0.0600059	0.0632062	0.189474	0.170356	0.149938	0.163448	0.123102	0.11271	0.135842	0.138073	0.285609	0.334958	0.271092	0.339242	0.33552	0.303913	0.0900093
514	0.118959	0.118448	0.122264	0.130729	0.128416	0.123424	0.115593	0.114391	0.0844314	0.0790835	0.111849	0.104004	0.217244	0.218079	0.19936	0.206793	0.222135	0.233405	0.18603	0.193347	0.187561	0.187555	0.195942	0.195777	0.123172	0.116187	0.130302	0.132883	0.0831313	0.0903348	0.144478	0.146981	0.0594134	0.0626153	0.18865	0.169557	0.149388	0.162821	0.122585	0.112192	0.135265	0.137484	0.284813	0.334065	0.27027	0.338375	0.334613	0.303047	0.0895504
515	0.118298	0.117813	0.121635	0.130055	0.127716	0.122722	0.114811	0.113618	0.0837706	0.078474	0.111114	0.103285	0.216556	0.217389	0.198719	0.206075	0.221368	0.232699	0.185297	0.192595	0.18686	0.186844	0.195145	0.195003	0.122599	0.115582	0.12971	0.132253	0.0825114	0.0897348	0.14369	0.146228	0.0588014	0.0620111	0.187823	0.168755	0.148857	0.162198	0.122073	0.111672	0.13469	0.136894	0.284035	0.333183	0.269451	0.337505	0.3337	0.302183	0.0890983
516	0.11764	0.117182	0.121011	0.129385	0.127025	0.122027	0.114024	0.112842	0.0831086	0.0778679	0.110374	0.102567	0.215873	0.216699	0.198078	0.205356	0.220601	0.231988	0.184573	0.191844	0.186163	0.186132	0.194351	0.194234	0.122026	0.114979	0.129129	0.131622	0.0818826	0.0891311	0.142897	0.145471	0.0581734	0.0613953	0.186991	0.167947	0.14834	0.161578	0.121563	0.111151	0.134117	0.136302	0.283267	0.332306	0.268632	0.336631	0.332781	0.301318	0.0886494
517	0.116981	0.11655	0.120385	0.128716	0.126336	0.121334	0.113231	0.11206	0.0824427	0.0772609	0.109626	0.101844	0.215189	0.216004	0.197433	0.20463	0.21983	0.23127	0.183849	0.191089	0.185463	0.185413	0.193555	0.193465	0.12145	0.114374	0.128553	0.130988	0.0812452	0.0885216	0.142096	0.144708	0.0575326	0.0607693	0.18615	0.167132	0.147827	0.160955	0.121052	0.110626	0.133542	0.135704	0.282502	0.331427	0.267809	0.335746	0.331852	0.300449	0.0881998
518	0.116315	0.115911	0.119753	0.128041	0.125642	0.120636	0.112428	0.111269	0.0817701	0.076649	0.108867	0.101113	0.214498	0.2153	0.196779	0.203895	0.21905	0.23054	0.18312	0.190326	0.184755	0.184684	0.19275	0.192689	0.120866	0.113763	0.127973	0.130345	0.0805993	0.0879044	0.141287	0.143934	0.0568823	0.0601347	0.185298	0.166306	0.147314	0.160328	0.120538	0.110096	0.132963	0.1351	0.281733	0.33054	0.26698	0.33485	0.330911	0.299571	0.087746
519	0.115639	0.115262	0.119108	0.127355	0.124936	0.119928	0.111613	0.110465	0.081088	0.076028	0.108094	0.10037	0.213795	0.214583	0.196113	0.203147	0.218258	0.229794	0.18238	0.18955	0.184031	0.18394	0.191933	0.1919	0.120269	0.113141	0.127382	0.12969	0.0799452	0.0872775	0.140467	0.143149	0.0562259	0.059493	0.184432	0.165468	0.146792	0.159693	0.120017	0.109561	0.132377	0.134487	0.280952	0.329638	0.26614	0.333938	0.329958	0.298683	0.087284
520	0.114948	0.114597	0.118445	0.126653	0.124212	0.119204	0.110783	0.109645	0.0803936	0.0753939	0.107304	0.0996115	0.213071	0.213848	0.195429	0.202382	0.217449	0.229031	0.181621	0.188758	0.183285	0.183176	0.191096	0.191093	0.119655	0.112504	0.126771	0.129018	0.0792832	0.0866387	0.139634	0.142349	0.0555666	0.0588456	0.18355	0.164616	0.146255	0.159046	0.119486	0.109019	0.131783	0.133864	0.280153	0.328715	0.265287	0.333007	0.328989	0.297779	0.0868104
521	0.114237	0.113913	0.117758	0.125931	0.123461	0.11846	0.109935	0.108806	0.0796843	0.0747427	0.106494	0.0988324	0.212322	0.213091	0.194723	0.201597	0.21662	0.228245	0.180838	0.187945	0.182511	0.182389	0.190235	0.190261	0.119018	0.111847	0.126135	0.128327	0.0786135	0.0859862	0.138786	0.141532	0.0549076	0.0581941	0.182648	0.163746	0.145696	0.158385	0.118943	0.10847	0.131178	0.133229	0.279326	0.327765	0.264417	0.332054	0.328003	0.296858	0.0863214
522	0.113502	0.113204	0.117042	0.125182	0.122678	0.117688	0.109066	0.107944	0.0789574	0.0740703	0.105662	0.0980295	0.21154	0.212309	0.193992	0.200787	0.215766	0.227434	0.180024	0.187106	0.181703	0.181574	0.189345	0.189398	0.118354	0.111166	0.125464	0.127611	0.0779363	0.0853178	0.137921	0.140694	0.0542522	0.05754	0.181725	0.162857	0.145108	0.157706	0.118385	0.107912	0.13056	0.132581	0.278467	0.326782	0.263527	0.331076	0.326998	0.295917	0.0858133
523	0.112739	0.112465	0.11629	0.124401	0.121854	0.116884	0.108174	0.107057	0.0782101	0.0733727	0.104804	0.0971987	0.21072	0.211495	0.193231	0.199948	0.214883	0.226594	0.179173	0.186237	0.180853	0.180727	0.188418	0.188499	0.117658	0.110455	0.124751	0.126868	0.0772519	0.0846315	0.137037	0.139833	0.0536036	0.0568847	0.180776	0.161946	0.144484	0.157006	0.117809	0.107344	0.129926	0.131916	0.277566	0.32576	0.262614	0.33007	0.325972	0.294951	0.0852825
524	0.111948	0.111702	0.115504	0.12359	0.120991	0.11605	0.107241	0.106128	0.0774297	0.0726425	0.103904	0.0963265	0.209869	0.210653	0.192444	0.19908	0.213971	0.225727	0.178286	0.185334	0.179962	0.179839	0.187453	0.187561	0.116925	0.109713	0.124006	0.126095	0.0765475	0.0839202	0.136122	0.138935	0.0529329	0.056199	0.179787	0.160997	0.143837	0.156289	0.11722	0.106768	0.129283	0.131234	0.276633	0.324703	0.261689	0.329036	0.324929	0.293969	0.0847288
525	0.111137	0.110925	0.114691	0.122756	0.120097	0.115193	0.10626	0.105154	0.0766112	0.0718798	0.102956	0.0954089	0.209	0.209788	0.191642	0.198184	0.213034	0.224839	0.17737	0.184398	0.179037	0.17891	0.186451	0.18659	0.116156	0.108943	0.123243	0.125296	0.0758145	0.0831818	0.13517	0.137992	0.0522175	0.0554621	0.178748	0.160005	0.143182	0.155561	0.116624	0.106186	0.128638	0.130535	0.27568	0.323623	0.260764	0.327979	0.323874	0.292981	0.0841563
526	0.110307	0.110134	0.113855	0.121901	0.119176	0.114318	0.105243	0.104144	0.0757637	0.071092	0.10197	0.0944565	0.208115	0.208904	0.190823	0.197265	0.212075	0.223931	0.176431	0.183436	0.178084	0.177949	0.18542	0.185592	0.115359	0.108151	0.122463	0.124476	0.0750595	0.0824218	0.13419	0.137016	0.05147	0.0546881	0.177672	0.158978	0.142519	0.154822	0.116022	0.105598	0.12799	0.129821	0.274709	0.322523	0.259836	0.326903	0.322807	0.291985	0.083568
527	0.109462	0.10933	0.112999	0.12103	0.118234	0.113428	0.104201	0.103109	0.0748961	0.0702863	0.100959	0.0934799	0.207213	0.208003	0.18999	0.196328	0.211099	0.223006	0.175473	0.182453	0.177107	0.176962	0.184366	0.184573	0.114539	0.107341	0.121669	0.123638	0.0742891	0.0816458	0.133189	0.136016	0.050703	0.053891	0.176569	0.157929	0.141847	0.154074	0.115413	0.105003	0.127337	0.129096	0.273724	0.321405	0.258901	0.325809	0.321728	0.29098	0.0829671
528	0.108604	0.108515	0.112129	0.120145	0.117276	0.112525	0.103146	0.10206	0.0740173	0.0694703	0.0999325	0.0924896	0.206296	0.207087	0.189143	0.195375	0.210108	0.222066	0.1745	0.181455	0.176113	0.175958	0.183296	0.183538	0.113704	0.106518	0.120863	0.122786	0.0735099	0.0808594	0.132178	0.135003	0.049929	0.0530847	0.175451	0.156865	0.141164	0.153318	0.114796	0.104403	0.126677	0.128362	0.272726	0.320274	0.257956	0.3247	0.320638	0.289964	0.0823565
529	0.107737	0.107689	0.111247	0.119249	0.116309	0.111612	0.102089	0.101008	0.073136	0.0686511	0.0989019	0.091496	0.205365	0.206158	0.188283	0.194411	0.209106	0.221112	0.173518	0.180447	0.175106	0.174943	0.182215	0.182495	0.11286	0.105688	0.120045	0.121926	0.0727286	0.0800681	0.131163	0.133986	0.0491603	0.0522832	0.174329	0.155799	0.140471	0.152553	0.114171	0.103797	0.126008	0.127622	0.271717	0.319132	0.256999	0.323579	0.319536	0.288936	0.0817391
530	0.106863	0.106853	0.110358	0.118347	0.115338	0.110693	0.10104	0.0999626	0.0722612	0.0678359	0.0978779	0.0905094	0.204421	0.205219	0.187409	0.19344	0.208097	0.220145	0.17253	0.179435	0.174093	0.173925	0.181131	0.181447	0.112014	0.104854	0.119219	0.12106	0.0719517	0.0792775	0.130153	0.132976	0.0484091	0.0515001	0.173214	0.154739	0.139766	0.151782	0.113538	0.103185	0.125329	0.126878	0.270701	0.317981	0.256027	0.322448	0.318422	0.287895	0.0811181
531	0.105985	0.106008	0.109465	0.117442	0.114367	0.109772	0.100012	0.0989347	0.0714013	0.067032	0.0968711	0.08954	0.203465	0.204273	0.186524	0.192467	0.207084	0.219169	0.171541	0.178425	0.173077	0.172912	0.18005	0.180403	0.111172	0.104022	0.118385	0.120193	0.0711859	0.0784932	0.129156	0.131983	0.0476878	0.0507491	0.172116	0.153697	0.139049	0.151005	0.112895	0.102567	0.124638	0.126134	0.269679	0.316826	0.255035	0.321309	0.317298	0.286839	0.0804962
532	0.105107	0.105155	0.108574	0.116536	0.113403	0.10885	0.0990144	0.0979343	0.070565	0.0662463	0.0958921	0.088598	0.202498	0.203322	0.185628	0.191494	0.206071	0.218183	0.170555	0.177422	0.172065	0.171911	0.178978	0.179366	0.110341	0.103197	0.117545	0.119329	0.0704378	0.0777207	0.12818	0.131016	0.0470084	0.0500438	0.171046	0.15268	0.138319	0.150222	0.112244	0.101943	0.123934	0.125391	0.268653	0.315669	0.254023	0.320166	0.316162	0.285766	0.0798765
533	0.104198	0.104269	0.107651	0.115603	0.11241	0.1079	0.0980064	0.0969207	0.0697163	0.0654455	0.0948982	0.08764	0.201492	0.202337	0.184694	0.190491	0.205026	0.21716	0.16954	0.176395	0.171019	0.170884	0.17788	0.178303	0.10949	0.102351	0.116673	0.118437	0.0696809	0.0769318	0.127186	0.130034	0.0463393	0.0493483	0.16996	0.151648	0.137558	0.149416	0.111567	0.101301	0.123203	0.12463	0.267602	0.314481	0.252971	0.318996	0.314993	0.284658	0.0792358
534	0.103235	0.10333	0.10667	0.114619	0.111356	0.106895	0.0969447	0.0958518	0.0688183	0.0645962	0.0938454	0.0866222	0.200425	0.201295	0.183702	0.189431	0.20392	0.216074	0.168464	0.175311	0.169906	0.169794	0.17672	0.177179	0.108585	0.101455	0.115744	0.11749	0.0688876	0.0760983	0.126138	0.128995	0.0456438	0.0486217	0.168813	0.150557	0.136752	0.148571	0.110853	0.100628	0.122438	0.123833	0.266503	0.313236	0.251868	0.317778	0.313773	0.283503	0.0785527
535	0.102223	0.102344	0.105637	0.11359	0.110247	0.105844	0.0958372	0.0947358	0.0678783	0.0637053	0.0927422	0.0855532	0.199303	0.200201	0.182659	0.18832	0.202761	0.214932	0.167335	0.174179	0.168733	0.16865	0.175506	0.176003	0.107635	0.100516	0.114767	0.116493	0.0680632	0.0752263	0.125044	0.127908	0.0449266	0.0478691	0.167613	0.149416	0.135907	0.147693	0.110106	0.0999302	0.121643	0.123004	0.265364	0.311943	0.250721	0.316518	0.312508	0.282305	0.0778328
536	0.101171	0.101318	0.10456	0.112521	0.109093	0.104753	0.094692	0.0935809	0.0669035	0.06278	0.0915973	0.0844418	0.198135	0.199063	0.181571	0.187166	0.201557	0.213742	0.166161	0.173006	0.16751	0.167458	0.174247	0.174781	0.106644	0.0995402	0.113749	0.115455	0.0672127	0.0743218	0.12391	0.126782	0.0441923	0.0470957	0.166371	0.148233	0.135028	0.146786	0.109331	0.0992108	0.120823	0.12215	0.264191	0.310608	0.249536	0.315222	0.311204	0.281071	0.0770819
537	0.100084	0.100258	0.103446	0.111421	0.107902	0.103629	0.093517	0.092395	0.0659011	0.0618272	0.090419	0.0832966	0.196928	0.197888	0.180446	0.185975	0.200316	0.212513	0.16495	0.171799	0.166245	0.166228	0.172951	0.173523	0.105622	0.0985345	0.112695	0.114381	0.0663413	0.0733908	0.122747	0.125624	0.0434454	0.0463068	0.165094	0.147018	0.134123	0.145856	0.108534	0.0984737	0.119983	0.121274	0.262988	0.309238	0.24832	0.313896	0.309869	0.279808	0.0763053
538	0.0989706	0.0991725	0.102303	0.110294	0.106681	0.102478	0.0923198	0.0911861	0.0648782	0.0608539	0.0892157	0.0821262	0.19569	0.196684	0.179291	0.184755	0.199045	0.211251	0.163709	0.170564	0.164947	0.164967	0.171625	0.172236	0.104573	0.0975051	0.111614	0.113281	0.065454	0.0724392	0.121561	0.124442	0.0426906	0.0455075	0.163792	0.145779	0.133195	0.144907	0.10772	0.097723	0.119125	0.120381	0.261763	0.30784	0.247079	0.312545	0.308509	0.278521	0.0755088
539	0.0978371	0.0980667	0.101139	0.109148	0.105438	0.101309	0.0911083	0.089962	0.0638419	0.0598669	0.0879956	0.0809391	0.194428	0.195457	0.178112	0.183514	0.197751	0.209965	0.162447	0.169311	0.163624	0.163683	0.170278	0.170928	0.103505	0.0964584	0.110512	0.112159	0.064556	0.071473	0.120361	0.123245	0.0419323	0.0447029	0.162473	0.144525	0.132252	0.143945	0.106892	0.0969626	0.118256	0.119476	0.26052	0.306421	0.245819	0.311176	0.30713	0.277216	0.0746977
540	0.0966909	0.0969478	0.0999615	0.107989	0.104182	0.100127	0.0898901	0.0887307	0.0627992	0.058873	0.086767	0.0797437	0.193149	0.194214	0.176918	0.182259	0.196442	0.208662	0.161172	0.168045	0.162286	0.162384	0.168918	0.169606	0.102425	0.0954006	0.109397	0.111024	0.0636525	0.0704982	0.119154	0.122041	0.041175	0.043898	0.161146	0.143263	0.131298	0.142976	0.106057	0.0961962	0.11738	0.118565	0.259266	0.304988	0.244546	0.309793	0.305738	0.275899	0.0738776
541	0.0955388	0.0958226	0.0987774	0.106824	0.10292	0.098941	0.0886726	0.0874997	0.0617571	0.057879	0.085538	0.0785483	0.191861	0.192964	0.175715	0.180997	0.195127	0.207351	0.159891	0.166773	0.160941	0.161079	0.167551	0.16828	0.101339	0.0943383	0.108276	0.109883	0.0627484	0.0695209	0.117949	0.120838	0.0404233	0.043098	0.159819	0.142003	0.13034	0.142002	0.105218	0.0954278	0.1165	0.11765	0.258005	0.303547	0.243266	0.308403	0.30434	0.274576	0.073054
542	0.0943881	0.0946979	0.0975946	0.105659	0.101661	0.0977566	0.0874635	0.0862767	0.0607223	0.0568917	0.0843166	0.077361	0.190573	0.191712	0.174511	0.179735	0.193812	0.206038	0.158613	0.165504	0.159597	0.159775	0.166188	0.166956	0.100254	0.0932777	0.107155	0.108742	0.0618491	0.068547	0.116753	0.119643	0.0396814	0.0423078	0.158501	0.140752	0.129382	0.141031	0.104381	0.0946613	0.115621	0.116738	0.256744	0.302105	0.241986	0.30701	0.302942	0.273254	0.0722321
543	0.0932457	0.0935804	0.0964207	0.104501	0.100413	0.0965811	0.08627	0.0850693	0.0597017	0.0559175	0.0831106	0.0761901	0.18929	0.190466	0.173311	0.17848	0.192506	0.204733	0.157345	0.164245	0.158264	0.15848	0.164835	0.165642	0.0991761	0.0922254	0.106042	0.107609	0.0609595	0.0675824	0.115574	0.118464	0.0389538	0.0415324	0.157199	0.139518	0.128431	0.140066	0.103551	0.0939003	0.114748	0.115833	0.255487	0.300668	0.240712	0.30562	0.30155	0.271937	0.0714173
544	0.0921187	0.0924768	0.0952632	0.103355	0.0991843	0.0954216	0.0850995	0.0838848	0.058702	0.0549631	0.0819279	0.0750435	0.188021	0.189234	0.172124	0.17724	0.191215	0.203442	0.156095	0.163002	0.15695	0.157203	0.1635	0.164347	0.0981131	0.0911876	0.104945	0.106491	0.0600848	0.0666332	0.114419	0.11731	0.0382449	0.0407768	0.155922	0.138311	0.127491	0.139113	0.102731	0.0931487	0.113884	0.114939	0.254241	0.299244	0.239448	0.304239	0.300169	0.270631	0.070615
545	0.0910142	0.0913939	0.0941296	0.102229	0.0979821	0.0942851	0.0839592	0.0827308	0.0577299	0.054035	0.0807763	0.0739293	0.186774	0.188022	0.170957	0.176023	0.189948	0.202173	0.154871	0.161783	0.155663	0.155951	0.162192	0.163078	0.0970712	0.0901708	0.103869	0.105395	0.0592301	0.0657054	0.113296	0.116187	0.0375589	0.0400457	0.154679	0.137137	0.126568	0.138176	0.101927	0.0924102	0.113034	0.114061	0.253011	0.297838	0.238202	0.302871	0.298806	0.269342	0.0698305
546	0.0899392	0.0903385	0.0930277	0.101129	0.0968149	0.0931786	0.0828562	0.0816143	0.0567921	0.0531397	0.0796635	0.0728552	0.185555	0.186838	0.169816	0.174835	0.188712	0.200934	0.153682	0.160594	0.154412	0.154733	0.160918	0.161844	0.0960572	0.0891813	0.102822	0.104329	0.0584006	0.064805	0.112213	0.115103	0.0369003	0.0393442	0.153477	0.136004	0.125667	0.13726	0.101143	0.0916885	0.112202	0.113203	0.251801	0.296456	0.236979	0.301521	0.297467	0.268075	0.0690688
547	0.0889008	0.0893174	0.0919648	0.100061	0.0956908	0.092109	0.0817976	0.0805428	0.055895	0.0522835	0.078597	0.0718291	0.184373	0.185688	0.168709	0.173683	0.187514	0.199734	0.152535	0.159445	0.153207	0.153556	0.159687	0.160652	0.0950779	0.0882256	0.101811	0.103298	0.0576013	0.0639379	0.111175	0.114066	0.0362734	0.038677	0.152323	0.134921	0.124795	0.13637	0.100384	0.0909874	0.111393	0.112371	0.250618	0.295105	0.235784	0.300196	0.296156	0.266836	0.0683354
548	0.0879061	0.0883372	0.0909487	0.0990327	0.0946179	0.0910835	0.0807906	0.0795232	0.0550453	0.0514729	0.0775843	0.0708587	0.183235	0.18458	0.167642	0.172576	0.186364	0.198579	0.151438	0.158341	0.152055	0.152428	0.158506	0.159509	0.0941398	0.08731	0.100843	0.10231	0.0568373	0.0631101	0.110192	0.113083	0.0356823	0.038049	0.151227	0.133895	0.123955	0.135511	0.0996543	0.0903105	0.11061	0.111567	0.249465	0.293792	0.234623	0.298899	0.294881	0.265631	0.0676352
549	0.0869621	0.0874047	0.0899868	0.0980494	0.0936041	0.0901089	0.0798419	0.0785629	0.0542494	0.0507142	0.076633	0.0699518	0.182148	0.183521	0.166624	0.171519	0.185267	0.197477	0.150399	0.157289	0.150966	0.151359	0.157384	0.158425	0.0932499	0.0864409	0.0999263	0.101373	0.0561139	0.0623276	0.10927	0.112161	0.0351313	0.0374649	0.150195	0.132934	0.123153	0.134686	0.0989586	0.0896614	0.109857	0.110798	0.24835	0.292521	0.233502	0.297636	0.293647	0.264464	0.0669735
550	0.0860759	0.0865267	0.0890868	0.0971179	0.0926577	0.0891924	0.0789587	0.0776688	0.0535137	0.0500136	0.0757505	0.069116	0.18112	0.182518	0.16566	0.170521	0.184232	0.196437	0.149426	0.156298	0.149948	0.150355	0.156328	0.157407	0.0924147	0.0856248	0.0990665	0.100493	0.0554361	0.0615965	0.108416	0.111308	0.0346248	0.0369296	0.149235	0.132045	0.122395	0.133901	0.0983013	0.0890438	0.109139	0.110066	0.247275	0.291299	0.232427	0.296412	0.292458	0.26334	0.0663554
551	0.0851877	0.0856384	0.0881859	0.0961715	0.0917124	0.0882678	0.0780871	0.0767857	0.0527961	0.0493297	0.0748788	0.0682986	0.180072	0.181501	0.164679	0.169516	0.183191	0.195386	0.148453	0.155303	0.148929	0.14935	0.155269	0.156388	0.091574	0.084801	0.0981968	0.0996093	0.0547627	0.0608682	0.107569	0.110464	0.0341383	0.0364189	0.148285	0.131165	0.121635	0.133112	0.0976494	0.0884206	0.108413	0.10933	0.246185	0.290065	0.23134	0.295171	0.291262	0.262204	0.0657452
552	0.0842456	0.0846848	0.0872294	0.0951541	0.0907101	0.0872789	0.0771788	0.0758642	0.0520573	0.0486239	0.0739663	0.0674515	0.178937	0.180409	0.163621	0.168448	0.182085	0.194261	0.147423	0.154251	0.147845	0.148287	0.154147	0.155309	0.0906758	0.0839179	0.0972598	0.0986685	0.0540573	0.0601002	0.106674	0.109578	0.0336482	0.0359087	0.147288	0.13024	0.120837	0.132281	0.0969729	0.0877604	0.107642	0.108553	0.245033	0.288768	0.230196	0.293867	0.290011	0.261007	0.0651104
553	0.0832682	0.0836873	0.0862364	0.0940885	0.089671	0.0862473	0.0762495	0.0749201	0.051308	0.0479067	0.0730295	0.0665886	0.177743	0.179266	0.162508	0.167338	0.180938	0.193087	0.146356	0.15316	0.146718	0.147185	0.152984	0.154193	0.0897392	0.0829955	0.0962774	0.09769	0.0533327	0.0593073	0.10575	0.108667	0.03316	0.0354035	0.146263	0.129288	0.120011	0.131422	0.0962812	0.0870757	0.106842	0.107748	0.243838	0.287428	0.229013	0.292519	0.288724	0.259769	0.064461
554	0.0822743	0.0826672	0.0852262	0.0929978	0.0886151	0.0851946	0.0753144	0.0739691	0.050559	0.0471889	0.0720853	0.0657237	0.176516	0.178097	0.161367	0.166206	0.179769	0.191887	0.145272	0.152051	0.145571	0.146066	0.151801	0.153058	0.0887837	0.0820535	0.0952716	0.0966936	0.0526015	0.0585044	0.104816	0.107747	0.0326791	0.0349078	0.145229	0.128327	0.119173	0.13055	0.0955834	0.086379	0.106027	0.10693	0.242621	0.286067	0.227809	0.291147	0.287419	0.25851	0.0638067
555	0.0812825	0.0816461	0.0842178	0.0919048	0.0875627	0.0841426	0.0743885	0.0730268	0.0498209	0.046481	0.07115	0.0648707	0.175284	0.176924	0.160222	0.165074	0.178602	0.190684	0.144191	0.150944	0.144427	0.144949	0.150621	0.151927	0.0878285	0.0811119	0.0942642	0.0956986	0.0518763	0.0577062	0.10389	0.106836	0.0322109	0.0344262	0.144205	0.127375	0.118336	0.129679	0.0948886	0.0856824	0.10521	0.106113	0.241399	0.284704	0.226604	0.289771	0.286112	0.257248	0.0631575
556	0.0803116	0.0806453	0.0832304	0.0908323	0.0865338	0.0831127	0.0734871	0.0721085	0.0491041	0.0457935	0.07024	0.0640431	0.174073	0.175773	0.159097	0.163963	0.177457	0.189503	0.143133	0.149859	0.143306	0.143855	0.149465	0.150819	0.0868929	0.0801905	0.0932773	0.0947246	0.0511699	0.0569277	0.102991	0.105952	0.0317607	0.0339632	0.143208	0.126451	0.117512	0.128822	0.0942059	0.0849984	0.104406	0.10531	0.240193	0.283359	0.225415	0.288408	0.284822	0.256003	0.0625231
557	0.0793803	0.0796862	0.0822833	0.0898033	0.0855486	0.0821267	0.0726248	0.0712297	0.0484192	0.0451367	0.0693715	0.0632545	0.172912	0.174665	0.158018	0.162894	0.176356	0.188366	0.142119	0.148816	0.142231	0.142805	0.148356	0.149755	0.0859962	0.0793091	0.0923327	0.0937911	0.0504948	0.0561835	0.102138	0.10511	0.0313338	0.0335232	0.142256	0.125573	0.116715	0.127994	0.0935444	0.084339	0.103629	0.104536	0.239022	0.282051	0.224262	0.287079	0.283565	0.254794	0.0619131
558	0.0785072	0.0787903	0.0813955	0.0888407	0.0846272	0.0812062	0.0718167	0.0704055	0.0477766	0.0445211	0.0685607	0.0625184	0.171827	0.173627	0.157008	0.161887	0.175322	0.187298	0.141167	0.147834	0.141225	0.141818	0.147314	0.148756	0.0851577	0.0784877	0.0914525	0.0929177	0.0498637	0.0554886	0.101347	0.104328	0.0309355	0.0331107	0.141369	0.124759	0.115957	0.127208	0.0929129	0.0837164	0.102893	0.103803	0.237903	0.280801	0.223161	0.2858	0.282358	0.253639	0.0613372
559	0.0777111	0.0779789	0.0805864	0.0879673	0.0837899	0.0803728	0.0710773	0.069651	0.0471866	0.043957	0.0678234	0.0618481	0.170845	0.17268	0.156092	0.160965	0.174375	0.186322	0.140299	0.146933	0.140309	0.140916	0.146363	0.147843	0.0843967	0.077746	0.0906585	0.0921239	0.0492893	0.0548578	0.100638	0.103623	0.0305713	0.0327302	0.140563	0.124026	0.115252	0.126479	0.0923205	0.0831426	0.102211	0.103125	0.236856	0.279627	0.222132	0.284591	0.281218	0.252556	0.0608051
560	0.0770107	0.0772734	0.0798749	0.0872061	0.0830566	0.0796482	0.0704214	0.0689812	0.0466596	0.0434547	0.0671755	0.061257	0.169994	0.171849	0.155295	0.160149	0.173538	0.185462	0.139534	0.146135	0.139506	0.140119	0.145523	0.147036	0.0837324	0.077104	0.0899727	0.0914291	0.0487842	0.0543058	0.100029	0.10301	0.0302462	0.0323861	0.139856	0.123392	0.114612	0.125819	0.0917759	0.0826295	0.101597	0.102517	0.235899	0.278548	0.221191	0.283469	0.280161	0.251564	0.0603263
561	0.0763606	0.0766208	0.0792136	0.0865023	0.0823979	0.0789886	0.0698229	0.0683722	0.0461789	0.0429988	0.0665897	0.0607243	0.169216	0.171074	0.154566	0.159393	0.172773	0.184673	0.138834	0.145389	0.13877	0.139384	0.144746	0.146292	0.0831209	0.0765176	0.0893454	0.0907885	0.0483228	0.0538046	0.0994841	0.102462	0.0299605	0.0320814	0.139218	0.12283	0.114003	0.125199	0.0912534	0.0821496	0.101013	0.101946	0.234985	0.277523	0.220294	0.282385	0.279155	0.250618	0.0598786
562	0.0757084	0.0759606	0.0785482	0.0857924	0.0817704	0.0783396	0.0692473	0.0677902	0.0457211	0.0425669	0.0660284	0.06022	0.168442	0.170289	0.153839	0.158646	0.172032	0.1839	0.138149	0.144643	0.138044	0.138658	0.143974	0.145557	0.0825103	0.0759341	0.0887181	0.0901493	0.0478729	0.0533184	0.0989604	0.10194	0.0297079	0.0318127	0.138606	0.122299	0.113387	0.124583	0.0907252	0.0816702	0.100415	0.101378	0.23406	0.276501	0.219391	0.281283	0.278156	0.249665	0.0594361
563	0.0750629	0.0753034	0.0778881	0.0850866	0.0811734	0.0777065	0.0686961	0.0672354	0.0452865	0.0421588	0.0654931	0.0597444	0.167679	0.169505	0.153123	0.157912	0.171314	0.183146	0.137483	0.143903	0.137335	0.137948	0.143215	0.144838	0.0819081	0.0753607	0.0880993	0.0895193	0.0474379	0.0528498	0.0984606	0.101445	0.0294843	0.031575	0.138023	0.121799	0.112771	0.123976	0.0901975	0.0811957	0.0998126	0.100816	0.233133	0.275489	0.21849	0.280176	0.277169	0.248714	0.0590021
564	0.0744324	0.0746596	0.0772428	0.0843949	0.0806061	0.0770948	0.0681708	0.0667079	0.0448754	0.041774	0.0649848	0.0592971	0.166936	0.168734	0.152425	0.157197	0.170622	0.182415	0.136841	0.143179	0.136648	0.137259	0.142477	0.144141	0.0813219	0.0748045	0.0874973	0.0889061	0.047021	0.0524016	0.0979876	0.100978	0.0292856	0.0313633	0.137468	0.121332	0.112162	0.123381	0.0896763	0.0807302	0.0992151	0.100266	0.232215	0.274492	0.217598	0.279074	0.276197	0.247773	0.0585803
565	0.0738256	0.0740398	0.0766216	0.0837273	0.0800678	0.0765099	0.0676729	0.0662077	0.0444879	0.0414121	0.0645048	0.0588784	0.166221	0.167987	0.151751	0.156507	0.169958	0.18171	0.136227	0.14248	0.135991	0.136598	0.141768	0.143473	0.0807591	0.0742725	0.0869208	0.0883176	0.0466254	0.0519768	0.0975444	0.100541	0.0291078	0.0311728	0.136943	0.120895	0.111569	0.122803	0.0891679	0.0802782	0.098631	0.099733	0.231314	0.273516	0.216724	0.277986	0.275243	0.24685	0.058174
566	0.0732511	0.0734545	0.076034	0.0830938	0.0795577	0.0759572	0.067204	0.065735	0.0441243	0.0410728	0.0640543	0.058488	0.16554	0.167277	0.151109	0.155849	0.169323	0.181036	0.135645	0.141814	0.135369	0.13597	0.141095	0.142839	0.0802273	0.0737719	0.0863782	0.0877615	0.0462543	0.0515781	0.0971339	0.100133	0.0289467	0.0309984	0.13645	0.120491	0.110998	0.122245	0.0886781	0.0798438	0.0980693	0.0992206	0.230441	0.272567	0.215875	0.276925	0.274311	0.245951	0.0577868
567	0.0727174	0.0729142	0.0754893	0.0825046	0.0790752	0.0754422	0.0667656	0.0652898	0.0437848	0.0407556	0.0636346	0.058126	0.164903	0.166614	0.150507	0.155227	0.168719	0.180396	0.1351	0.14119	0.134789	0.135381	0.140467	0.142247	0.0797341	0.0733098	0.0858779	0.0872456	0.045911	0.0512084	0.096759	0.099758	0.0287983	0.0308352	0.135991	0.120117	0.110456	0.121711	0.0882131	0.0794313	0.0975387	0.0987338	0.229605	0.27165	0.215059	0.2759	0.273403	0.245085	0.057422
568	0.072233	0.0724293	0.0749969	0.0819696	0.0786196	0.0749701	0.0663591	0.0648722	0.0434697	0.0404602	0.0632467	0.0577923	0.164317	0.166011	0.14995	0.154647	0.168146	0.179793	0.134595	0.140617	0.134258	0.134838	0.139892	0.141702	0.0792869	0.0728932	0.0854286	0.0867775	0.0455988	0.0508704	0.0964227	0.0994152	0.0286587	0.0306784	0.135565	0.119775	0.10995	0.121206	0.0877789	0.079045	0.0970478	0.0982773	0.228814	0.27077	0.214283	0.274921	0.272524	0.24426	0.0570832
569	0.0718065	0.0720105	0.0745662	0.081499	0.07819	0.0745466	0.0659861	0.0644825	0.0431793	0.0401863	0.062892	0.057487	0.16379	0.165479	0.149447	0.154116	0.167608	0.179232	0.134136	0.140104	0.133781	0.134347	0.139378	0.14121	0.0788933	0.0725292	0.0850386	0.0863651	0.0453207	0.050567	0.0961278	0.0991062	0.0285236	0.0305229	0.135175	0.119464	0.109488	0.120734	0.0873815	0.0786891	0.0966055	0.0978558	0.228078	0.269934	0.213556	0.274	0.271676	0.243483	0.0567737
570	0.0714481	0.0716693	0.0742118	0.0811067	0.0778261	0.0741985	0.0656694	0.0641454	0.0429342	0.039954	0.062595	0.0572349	0.163351	0.165032	0.149014	0.15365	0.167129	0.17874	0.133751	0.139667	0.133382	0.133921	0.138941	0.140789	0.0785637	0.072233	0.0847246	0.0860192	0.0450918	0.0503149	0.0959054	0.0988616	0.0284197	0.0303934	0.134851	0.119223	0.10907	0.120305	0.0870175	0.0783728	0.0962122	0.0974821	0.227401	0.26915	0.212881	0.273136	0.270874	0.242764	0.0564959
571	0.0711559	0.0714026	0.0739338	0.0807921	0.0775564	0.073939	0.0654234	0.0638783	0.0427486	0.0397778	0.0623712	0.0570531	0.163012	0.164665	0.148655	0.153254	0.166725	0.178333	0.133453	0.13931	0.133073	0.133562	0.138586	0.140441	0.0782973	0.0720075	0.0844894	0.0857391	0.0449189	0.050123	0.0957741	0.0987012	0.0283696	0.030312	0.134612	0.119077	0.108689	0.119926	0.0866782	0.0780981	0.0958591	0.0971604	0.226775	0.268418	0.212256	0.272319	0.270122	0.242102	0.0562475
572	0.0709203	0.0711989	0.0737203	0.0805424	0.0773634	0.0737523	0.0652364	0.0636697	0.0426127	0.0396486	0.0622088	0.0569303	0.162754	0.164366	0.148359	0.152918	0.166384	0.177996	0.133228	0.139019	0.132837	0.133261	0.138299	0.140157	0.0780852	0.0718419	0.0843205	0.0855156	0.0447934	0.0499821	0.0957177	0.0986103	0.0283633	0.0302703	0.134443	0.119009	0.10834	0.119587	0.0863617	0.0778581	0.0955406	0.0968816	0.226192	0.26773	0.211672	0.271541	0.269414	0.241488	0.0560256
573	0.0707319	0.0710467	0.0735593	0.0803451	0.0772296	0.0736228	0.0650973	0.0635084	0.042517	0.0395574	0.0620959	0.0568551	0.16256	0.164121	0.148114	0.152631	0.166095	0.177714	0.133061	0.138783	0.132661	0.13301	0.138068	0.139925	0.0779185	0.0717253	0.0842058	0.0853391	0.0447066	0.0498829	0.0957203	0.0985744	0.028391	0.03026	0.134331	0.119002	0.108019	0.119281	0.0860661	0.0776461	0.0952514	0.096637	0.225645	0.267078	0.211122	0.270797	0.26874	0.240912	0.0558273
574	0.0705811	0.0709346	0.0734388	0.0801878	0.0771378	0.073535	0.0649944	0.063383	0.0424517	0.0394954	0.0620206	0.0568161	0.162412	0.163919	0.147909	0.152382	0.165844	0.177474	0.132937	0.138588	0.132531	0.132798	0.137881	0.139735	0.0777883	0.0716467	0.0841329	0.0852004	0.04465	0.0498162	0.0957662	0.0985789	0.0284427	0.0302727	0.13426	0.119039	0.107722	0.118999	0.0857895	0.0774555	0.094986	0.0964176	0.225127	0.266455	0.210601	0.270079	0.268093	0.240365	0.0556496
575	0.0704582	0.0708511	0.0733468	0.0800577	0.0770704	0.0734731	0.0649166	0.0632823	0.0424073	0.0394535	0.0619711	0.0568019	0.162292	0.163746	0.147731	0.152161	0.165619	0.177259	0.13284	0.138422	0.132431	0.132616	0.137726	0.139576	0.0776857	0.0715953	0.0840895	0.0850902	0.0446149	0.049773	0.0958393	0.0986092	0.0285087	0.0303001	0.134215	0.119101	0.107445	0.118733	0.08553	0.0772795	0.094739	0.0962145	0.22463	0.265853	0.210101	0.26938	0.267463	0.239838	0.0554896
576	0.0703539	0.0707847	0.0732713	0.0799425	0.07701	0.0734216	0.0648525	0.0631951	0.0423742	0.0394228	0.0619356	0.0568013	0.162183	0.16359	0.147568	0.151956	0.165408	0.177057	0.132756	0.138271	0.132348	0.132455	0.137589	0.139438	0.0776017	0.0715601	0.0840632	0.0849989	0.0445927	0.0497439	0.0959238	0.0986509	0.028579	0.0303337	0.134183	0.119172	0.107184	0.118475	0.0852857	0.0771115	0.0945049	0.0960191	0.224147	0.265265	0.209615	0.268695	0.266843	0.239322	0.0553444
577	0.0702584	0.0707239	0.0732004	0.0798294	0.0769393	0.0733647	0.0647906	0.0631101	0.0423426	0.0393943	0.0619022	0.056803	0.162067	0.163437	0.147411	0.151757	0.165199	0.176851	0.132669	0.138124	0.132266	0.132306	0.137459	0.13931	0.0775274	0.0715303	0.0840417	0.0849174	0.0445747	0.0497198	0.0960038	0.0986893	0.0286437	0.0303653	0.134147	0.119235	0.106934	0.118218	0.0850547	0.0769447	0.0942785	0.0958224	0.223671	0.264683	0.209137	0.268016	0.266225	0.238807	0.0552111
578	0.0701624	0.0706572	0.0731221	0.0797061	0.0768407	0.073287	0.0647198	0.063016	0.0423032	0.0393592	0.0618593	0.0567955	0.161926	0.163276	0.147245	0.151553	0.16498	0.176629	0.132564	0.137967	0.132172	0.132158	0.137323	0.13918	0.0774538	0.071495	0.0840128	0.0848362	0.0445523	0.0496915	0.0960634	0.0987099	0.028693	0.0303865	0.134095	0.119272	0.106692	0.117954	0.0848351	0.0767726	0.0940544	0.0956157	0.223194	0.264101	0.208661	0.267337	0.265601	0.238285	0.0550866
579	0.0700562	0.0705732	0.0730244	0.0795598	0.076697	0.0731726	0.0646287	0.0629018	0.0422461	0.0393085	0.0617948	0.0567676	0.161742	0.163092	0.147061	0.151333	0.164738	0.176375	0.132426	0.137788	0.13205	0.132003	0.137168	0.139039	0.0773721	0.0714432	0.083964	0.0847459	0.0445169	0.0496499	0.0960867	0.0986982	0.0287169	0.0303889	0.134011	0.119265	0.106454	0.117673	0.084625	0.0765885	0.0938271	0.0953903	0.222708	0.26351	0.208178	0.266651	0.264963	0.237747	0.0549682
580	0.0699979	0.0705292	0.072971	0.0794521	0.0765768	0.0730875	0.0645684	0.0628185	0.0422198	0.0392856	0.061762	0.0567733	0.161596	0.162959	0.146922	0.151164	0.164539	0.176156	0.13233	0.137656	0.131975	0.131905	0.137066	0.138955	0.0773375	0.0714328	0.0839582	0.0847057	0.0445133	0.0496424	0.0961486	0.0987255	0.028756	0.0304073	0.133961	0.119291	0.106257	0.117404	0.0844469	0.0764155	0.0936298	0.0951848	0.222268	0.262969	0.207744	0.266006	0.264357	0.237242	0.0548781
581	0.0700373	0.070577	0.0730182	0.0794389	0.0765463	0.0730938	0.0645858	0.0628131	0.0422673	0.0393299	0.0618095	0.0568618	0.161561	0.162939	0.146883	0.151102	0.164444	0.176034	0.132341	0.137629	0.132012	0.131917	0.137076	0.138984	0.0773969	0.0715151	0.0840512	0.0847653	0.0445815	0.0497111	0.0963177	0.0988561	0.0288486	0.0304742	0.134008	0.11942	0.106131	0.117172	0.0843181	0.0762775	0.0934911	0.0950353	0.221915	0.262527	0.207403	0.265438	0.263826	0.236815	0.0548345
582	0.0701521	0.0706963	0.0731428	0.0794989	0.0765841	0.0731707	0.0646635	0.0628679	0.0423715	0.0394259	0.0619197	0.057014	0.161611	0.163005	0.146923	0.151121	0.164427	0.175987	0.132433	0.137684	0.132136	0.132014	0.137174	0.139101	0.077529	0.0716687	0.0842202	0.0849018	0.0447049	0.0498389	0.0965679	0.0990648	0.0289816	0.0305783	0.134128	0.119628	0.10606	0.116972	0.0842287	0.0761681	0.0933984	0.0949292	0.221628	0.262157	0.207133	0.26493	0.26335	0.236447	0.0548287
583	0.0703202	0.0708671	0.0733216	0.0796111	0.0766691	0.0732971	0.064784	0.0629653	0.0425149	0.039558	0.0620745	0.0572111	0.161719	0.163131	0.147018	0.151197	0.164465	0.175992	0.132582	0.137796	0.132318	0.13217	0.137333	0.139279	0.0777124	0.0718726	0.0844428	0.0850923	0.0448675	0.0500083	0.0968734	0.0993263	0.0291419	0.0307082	0.1343	0.119889	0.106028	0.116797	0.0841687	0.0760814	0.0933393	0.0948538	0.221386	0.261834	0.206909	0.264462	0.262911	0.236119	0.0548515
584	0.0705194	0.0710692	0.0735315	0.0797544	0.0767798	0.0734521	0.0649298	0.0630879	0.0426803	0.039711	0.062256	0.0574341	0.161858	0.16329	0.147145	0.151304	0.164532	0.176026	0.13276	0.137938	0.132534	0.13236	0.137526	0.13949	0.0779257	0.0721058	0.0846961	0.0853138	0.0450528	0.0502021	0.097208	0.0996153	0.0293162	0.0308524	0.134499	0.120177	0.106018	0.116639	0.0841284	0.0760114	0.0933015	0.0947963	0.221166	0.261535	0.20671	0.264015	0.262491	0.235814	0.0548941
585	0.0707277	0.0712826	0.0737493	0.0799077	0.0768951	0.0736148	0.0650835	0.063218	0.0428504	0.0398692	0.0624464	0.057664	0.162003	0.163455	0.14728	0.151417	0.164606	0.176067	0.132942	0.138088	0.132757	0.132558	0.137728	0.139709	0.0781475	0.0723471	0.0849577	0.0855432	0.0452446	0.0504029	0.0975457	0.0999064	0.0294915	0.0309994	0.134705	0.120466	0.106014	0.116492	0.084098	0.0759519	0.0932724	0.0947441	0.220947	0.261234	0.206513	0.263571	0.262073	0.235513	0.0549477
586	0.0709229	0.071487	0.0739518	0.0800499	0.0769936	0.0737642	0.0652277	0.0633381	0.0430078	0.0400174	0.0626276	0.0578819	0.162125	0.163601	0.147401	0.15151	0.16466	0.176092	0.133102	0.138219	0.13296	0.132739	0.137912	0.139909	0.0783565	0.0725753	0.0852049	0.0857576	0.0454266	0.0505936	0.0978604	0.100174	0.0296543	0.0311379	0.134893	0.120732	0.106001	0.11635	0.0840676	0.075897	0.0932397	0.0946846	0.220708	0.260907	0.206296	0.26311	0.261638	0.235198	0.0550033
587	0.0710828	0.0716624	0.0741157	0.0801598	0.0770539	0.0738793	0.0653447	0.0634305	0.0431353	0.0401398	0.0627817	0.0580686	0.162198	0.163701	0.147484	0.151558	0.164672	0.176078	0.133213	0.138307	0.133117	0.132877	0.138052	0.140062	0.0785313	0.0727694	0.0854149	0.085934	0.0455824	0.0507567	0.0981259	0.100393	0.0297917	0.0312564	0.135042	0.120949	0.105961	0.116205	0.0840274	0.0758405	0.0931911	0.0946051	0.220427	0.260528	0.206035	0.262615	0.261168	0.234851	0.0550519
588	0.0711853	0.0717886	0.074218	0.0802163	0.077055	0.0739393	0.065417	0.0634775	0.0432153	0.0402211	0.0628907	0.0582052	0.162197	0.163728	0.147506	0.151537	0.164616	0.176003	0.13325	0.138327	0.133201	0.132946	0.138123	0.140143	0.0786505	0.0729082	0.0855652	0.0860495	0.0456958	0.050875	0.0983159	0.100538	0.0298903	0.0313433	0.135128	0.12109	0.105879	0.116051	0.0839676	0.0757764	0.0931141	0.094493	0.220083	0.260075	0.205709	0.262066	0.260645	0.234453	0.0550847
589	0.0713014	0.0719343	0.0743307	0.0802902	0.0770472	0.0740072	0.0654947	0.0635293	0.0432923	0.0403065	0.063008	0.058342	0.162186	0.163758	0.14754	0.151519	0.164563	0.175928	0.13328	0.138352	0.133292	0.13303	0.138202	0.140237	0.0787817	0.0730541	0.0857197	0.0861716	0.0458159	0.0509993	0.0985017	0.100677	0.0299814	0.0314294	0.135215	0.12122	0.105801	0.115913	0.0839196	0.0757301	0.0930491	0.0943882	0.219741	0.259612	0.205375	0.261519	0.260109	0.234053	0.0551426
590	0.0715037	0.0721684	0.0745282	0.0804527	0.0770882	0.0741491	0.0656308	0.0636389	0.0434154	0.0404439	0.0631895	0.0585342	0.16224	0.163873	0.147661	0.151585	0.164585	0.175918	0.133378	0.138461	0.133469	0.133216	0.138374	0.140432	0.0789944	0.0732725	0.0859468	0.0863716	0.0459939	0.051183	0.0987609	0.100883	0.030101	0.0315482	0.135369	0.121407	0.105776	0.115815	0.0839153	0.0757248	0.0930367	0.0943315	0.219467	0.259212	0.205094	0.261031	0.259605	0.233702	0.0552632
591	0.0717723	0.0724706	0.0747905	0.0806834	0.077167	0.0743477	0.0658129	0.0637938	0.0435745	0.0406213	0.0634212	0.05877	0.162344	0.164053	0.147849	0.151714	0.164665	0.17596	0.133528	0.138632	0.133714	0.13348	0.138615	0.140704	0.0792699	0.0735473	0.0862302	0.0866319	0.0462169	0.0514131	0.0990758	0.10114	0.0302425	0.0316923	0.135576	0.12164	0.105791	0.115749	0.0839454	0.0757521	0.0930654	0.0943118	0.219245	0.25886	0.204855	0.260587	0.259127	0.23339	0.0554326
592	0.0720875	0.072821	0.0750978	0.080962	0.0772725	0.0745861	0.0660281	0.0639811	0.0437593	0.040827	0.0636889	0.0590374	0.162484	0.164279	0.148084	0.151887	0.164785	0.176037	0.133714	0.138847	0.134003	0.133795	0.138906	0.141028	0.0795896	0.073862	0.0865536	0.0869352	0.0464718	0.0516762	0.099429	0.101433	0.0303993	0.0318545	0.135819	0.121903	0.105836	0.115707	0.0840008	0.0758034	0.0931235	0.0943179	0.219058	0.258541	0.204645	0.260175	0.258666	0.233105	0.0556366
593	0.0724294	0.0731995	0.0754303	0.0812683	0.0773936	0.0748471	0.0662641	0.0641881	0.0439597	0.041049	0.0639785	0.0593245	0.162645	0.164531	0.148345	0.152083	0.164927	0.176134	0.13392	0.139087	0.134318	0.13414	0.139225	0.14138	0.0799348	0.0742003	0.0869007	0.0872639	0.0467456	0.0519591	0.099803	0.101745	0.0305647	0.0320272	0.136083	0.122184	0.105897	0.115681	0.0840724	0.0758699	0.0931995	0.0943388	0.21889	0.258238	0.204451	0.259779	0.258217	0.232834	0.0558614
594	0.0727781	0.0735861	0.075768	0.0815819	0.0775194	0.0751137	0.066508	0.0644018	0.0441655	0.0412755	0.0642757	0.0596193	0.162811	0.164789	0.148612	0.152284	0.165073	0.176236	0.134129	0.139331	0.134637	0.13449	0.139549	0.141736	0.0802868	0.074546	0.0872554	0.0876006	0.0470253	0.0522487	0.10018	0.10206	0.0307323	0.0322033	0.136352	0.122468	0.105962	0.115662	0.0841508	0.075943	0.0932816	0.0943634	0.218723	0.257937	0.20426	0.259387	0.257772	0.232568	0.0560929
595	0.073114	0.0739607	0.0760912	0.0818826	0.0776389	0.0753689	0.0667471	0.0646096	0.0443664	0.0414945	0.0645665	0.0599097	0.162969	0.165034	0.148864	0.152468	0.165206	0.176329	0.134327	0.139561	0.134939	0.13482	0.139859	0.142073	0.080627	0.0748827	0.0876013	0.0879278	0.0472979	0.0525316	0.100543	0.102361	0.0308954	0.0323753	0.136611	0.122742	0.106019	0.115644	0.084227	0.0760142	0.0933583	0.0943804	0.218542	0.257622	0.20406	0.258983	0.257325	0.232294	0.056317
596	0.0734171	0.0743033	0.07638	0.08215	0.077741	0.0755956	0.0669689	0.0647986	0.0445523	0.0416941	0.0648365	0.0601837	0.163103	0.165247	0.149082	0.152618	0.165308	0.176397	0.134498	0.139757	0.135203	0.135106	0.140132	0.142365	0.0809368	0.0751942	0.0879223	0.088228	0.0475504	0.0527947	0.100874	0.102633	0.0310473	0.0325358	0.136844	0.122991	0.106056	0.115616	0.0842917	0.0760748	0.0934179	0.0943787	0.21833	0.257279	0.203837	0.258554	0.256868	0.232002	0.0565196
597	0.0736676	0.0745939	0.0766145	0.0823639	0.0778148	0.0757767	0.0671605	0.0649559	0.0447128	0.0418623	0.0650715	0.0604293	0.1632	0.165409	0.149244	0.152711	0.16536	0.176424	0.134624	0.139899	0.135409	0.135325	0.140347	0.142589	0.0811975	0.0754641	0.088202	0.0884838	0.0477698	0.0530248	0.101155	0.102859	0.0311816	0.0326774	0.137036	0.123202	0.10606	0.115573	0.0843358	0.0761161	0.0934487	0.0943473	0.21807	0.25689	0.203581	0.258086	0.256394	0.23168	0.0566867
598	0.0738457	0.0748123	0.0767749	0.0825039	0.0778491	0.0758952	0.0673091	0.0650686	0.0448378	0.0419872	0.0652572	0.0606343	0.163243	0.165498	0.14933	0.15273	0.165346	0.176396	0.134691	0.139967	0.135536	0.135452	0.140484	0.142721	0.0813904	0.0756762	0.0884243	0.0886777	0.047943	0.0532086	0.101368	0.103022	0.0312915	0.0327928	0.13717	0.123361	0.10602	0.115504	0.0843501	0.0761295	0.0934391	0.0942751	0.217746	0.256443	0.203277	0.257566	0.255897	0.231316	0.0568041
599	0.0740109	0.0750333	0.0769237	0.0826361	0.0778706	0.0760056	0.0674542	0.0651737	0.0449497	0.0421008	0.0654411	0.0608355	0.163276	0.165576	0.149398	0.152718	0.165307	0.176361	0.134742	0.140021	0.135655	0.135556	0.140618	0.14283	0.0815718	0.0758831	0.0886457	0.0888585	0.0481146	0.0533917	0.101564	0.103167	0.031393	0.0328994	0.137293	0.123501	0.105973	0.115457	0.0843707	0.0761572	0.0934384	0.0941996	0.217395	0.255955	0.202941	0.257028	0.255381	0.230943	0.0569226
600	0.0742255	0.0753292	0.0771253	0.0828275	0.0779092	0.0761637	0.0676364	0.0653107	0.0450755	0.0422386	0.0656713	0.0610711	0.163344	0.165703	0.149509	0.152728	0.165295	0.176368	0.134823	0.140119	0.135838	0.135708	0.140828	0.142989	0.0818008	0.0761387	0.0889227	0.0890787	0.0483289	0.0536195	0.101798	0.103344	0.0315044	0.0330172	0.137455	0.123663	0.10596	0.115469	0.0844321	0.0762366	0.0934927	0.0941588	0.21706	0.255459	0.202598	0.25651	0.254855	0.230595	0.057092
601	0.0744742	0.075677	0.077363	0.0830594	0.0779593	0.076354	0.0678452	0.0654702	0.0452114	0.0423932	0.0659341	0.0613311	0.163436	0.165863	0.149649	0.152753	0.165299	0.176404	0.134925	0.140247	0.136066	0.135894	0.14109	0.143183	0.0820628	0.0764281	0.0892385	0.0893266	0.0485732	0.0538787	0.102057	0.103541	0.0316225	0.0331431	0.137643	0.123837	0.105971	0.115523	0.0845231	0.0763525	0.0935854	0.0941415	0.216736	0.254956	0.20225	0.256005	0.254323	0.230263	0.0572969
602	0.0747414	0.0760534	0.07762	0.0833129	0.0780152	0.076561	0.06807	0.0656429	0.0453535	0.0425574	0.0662158	0.0616059	0.163541	0.166042	0.149804	0.152784	0.16531	0.176454	0.135038	0.140392	0.136317	0.136097	0.14138	0.143395	0.0823431	0.0767365	0.0895766	0.0895905	0.0488344	0.0541562	0.102328	0.103748	0.0317441	0.0332735	0.137845	0.124017	0.105996	0.115602	0.0846323	0.0764892	0.0936996	0.0941368	0.216417	0.254448	0.201898	0.255507	0.253787	0.229939	0.057522
603	0.0750116	0.0764352	0.0778795	0.0835693	0.078071	0.0767694	0.0683	0.0658194	0.0454981	0.042724	0.0665026	0.0618854	0.163647	0.166222	0.149959	0.152814	0.16532	0.176505	0.13515	0.140538	0.13657	0.136301	0.141674	0.143607	0.0826272	0.0770493	0.0899203	0.0898587	0.0490996	0.0544386	0.102598	0.103954	0.031866	0.0334053	0.138049	0.124196	0.106023	0.115687	0.0847481	0.0766314	0.0938188	0.0941336	0.216096	0.253935	0.201543	0.25501	0.253252	0.229616	0.0577519
604	0.0752695	0.0767992	0.0781247	0.0838097	0.0781211	0.0769637	0.0685246	0.0659903	0.0456413	0.0428858	0.0667808	0.0621597	0.163741	0.166389	0.1501	0.152835	0.16532	0.176543	0.135251	0.14067	0.136804	0.13649	0.141949	0.143805	0.0829003	0.0773517	0.0902529	0.0901194	0.049356	0.0547127	0.102854	0.104147	0.031985	0.0335351	0.138242	0.124367	0.106044	0.115763	0.0848592	0.0767635	0.0939263	0.094121	0.215768	0.25342	0.201189	0.254505	0.252719	0.229286	0.0579711
605	0.0754996	0.0771223	0.0783388	0.0840155	0.0781596	0.0771285	0.0687331	0.0661464	0.0457793	0.0430354	0.0670366	0.0624189	0.163814	0.166527	0.150214	0.15284	0.1653	0.176556	0.135332	0.140774	0.137	0.136647	0.142181	0.143969	0.0831479	0.0776288	0.0905578	0.0903608	0.0495906	0.0549651	0.103082	0.104317	0.0320979	0.0336595	0.138412	0.124522	0.106047	0.115811	0.0849541	0.07687	0.0940054	0.0940879	0.215425	0.252904	0.200835	0.253987	0.252191	0.22894	0.0581641
606	0.0756863	0.0773813	0.078505	0.0841678	0.078181	0.0772483	0.0689148	0.066278	0.0459082	0.0431657	0.067256	0.0626531	0.163853	0.16662	0.150286	0.15282	0.165251	0.176528	0.135381	0.140836	0.137135	0.136758	0.142348	0.144086	0.0833554	0.0778659	0.0908182	0.0905713	0.0497904	0.0551826	0.103271	0.104453	0.0322015	0.0337752	0.138547	0.124654	0.106023	0.115813	0.0850213	0.0769353	0.0940393	0.0940233	0.215063	0.252388	0.200484	0.253449	0.251673	0.228571	0.0583154
607	0.0758143	0.0775529	0.0786065	0.0842478	0.0781794	0.0773078	0.0690589	0.066376	0.0460242	0.0432692	0.0674252	0.0628522	0.163847	0.166653	0.150301	0.152768	0.165166	0.176448	0.13539	0.14084	0.137189	0.136805	0.142425	0.144136	0.0835081	0.0780483	0.0910176	0.0907391	0.0499426	0.0553519	0.103407	0.104545	0.0322925	0.0338789	0.138634	0.124756	0.105962	0.115753	0.0850495	0.076944	0.0940113	0.0939163	0.214675	0.251874	0.200138	0.252884	0.251165	0.228172	0.0584095
608	0.0759043	0.0776639	0.0786623	0.0842734	0.0781649	0.0773211	0.0691869	0.0664595	0.0461393	0.0433592	0.0675686	0.0630386	0.163813	0.166644	0.150279	0.152694	0.165056	0.176332	0.135372	0.140806	0.137184	0.136807	0.142438	0.144141	0.083627	0.0781976	0.0911815	0.0908849	0.0500646	0.0554934	0.103507	0.104606	0.0323792	0.0339813	0.138696	0.12484	0.105881	0.115651	0.0850636	0.0769185	0.0939453	0.0937762	0.214266	0.251365	0.199804	0.252299	0.25068	0.227755	0.0584696
609	0.0759872	0.0777572	0.078703	0.0842765	0.078151	0.077314	0.0693258	0.0665528	0.0462667	0.0434528	0.0677187	0.0632395	0.163773	0.166624	0.150246	0.152612	0.164944	0.17621	0.13535	0.140761	0.137153	0.136795	0.142426	0.14413	0.0837423	0.0783451	0.0913456	0.0910363	0.0501822	0.0556354	0.103597	0.104659	0.032471	0.0340941	0.138764	0.124925	0.105806	0.115543	0.0850942	0.0768915	0.0938757	0.0936205	0.213846	0.250863	0.199485	0.251707	0.250222	0.22734	0.0585287
610	0.0760626	0.077834	0.0787293	0.084259	0.078137	0.0772883	0.0694734	0.066654	0.0464041	0.043549	0.0678735	0.0634517	0.163728	0.166593	0.150204	0.152522	0.164826	0.17608	0.135322	0.140705	0.137099	0.136769	0.142393	0.144104	0.0838534	0.0784898	0.0915086	0.0911912	0.050295	0.0557768	0.103676	0.104703	0.0325665	0.0342151	0.138835	0.12501	0.105735	0.115427	0.0851385	0.0768625	0.0938023	0.0934506	0.213416	0.250365	0.199178	0.251107	0.249786	0.226924	0.0585858
611	0.0761304	0.0778951	0.0787421	0.0842229	0.0781224	0.0772461	0.0696274	0.0667608	0.0465495	0.0436466	0.0680311	0.0636725	0.163678	0.166551	0.150153	0.152425	0.164704	0.175943	0.13529	0.140639	0.137025	0.13673	0.142339	0.144064	0.0839595	0.0786311	0.0916694	0.0913479	0.0504027	0.0559167	0.103744	0.104738	0.0326643	0.0343424	0.138908	0.125092	0.105667	0.115305	0.0851938	0.0768313	0.0937244	0.0932682	0.212975	0.249869	0.198881	0.2505	0.249369	0.226508	0.0586403
612	0.07619	0.0779416	0.078742	0.0841701	0.0781066	0.0771891	0.0697853	0.0668713	0.0467007	0.0437445	0.0681894	0.0638989	0.163621	0.166499	0.150092	0.152321	0.164576	0.175799	0.135251	0.140563	0.136931	0.136678	0.142266	0.144011	0.0840601	0.078768	0.0918266	0.0915046	0.050505	0.0560538	0.103802	0.104764	0.0327629	0.0344739	0.13898	0.12517	0.105599	0.115178	0.0852571	0.0767974	0.0936418	0.0930745	0.212524	0.249375	0.198592	0.249886	0.248966	0.22609	0.0586911
613	0.0762414	0.0779746	0.0787299	0.0841027	0.078089	0.0771192	0.069945	0.0669834	0.0468555	0.0438417	0.0683465	0.064128	0.163557	0.166436	0.150022	0.15221	0.164443	0.175647	0.135205	0.140478	0.13682	0.136613	0.142176	0.143945	0.0841544	0.0788998	0.091979	0.0916594	0.0506015	0.0561873	0.103849	0.104779	0.032861	0.0346077	0.139048	0.125244	0.10553	0.115046	0.0853258	0.0767605	0.0935539	0.0928711	0.212065	0.248879	0.198306	0.249265	0.248573	0.22567	0.0587375
614	0.076284	0.0779951	0.0787064	0.0840226	0.078069	0.0770384	0.070104	0.0670951	0.0470117	0.043937	0.0685005	0.0643567	0.163486	0.166363	0.149944	0.152092	0.164302	0.175487	0.135152	0.140383	0.136693	0.136538	0.142071	0.143867	0.0842418	0.0790256	0.0921254	0.0918106	0.0506918	0.0563159	0.103885	0.104785	0.032957	0.0347416	0.139111	0.125312	0.105459	0.114909	0.085397	0.0767203	0.0934604	0.0926595	0.211596	0.24838	0.198022	0.248637	0.248185	0.225245	0.0587786
615	0.0763177	0.078004	0.0786724	0.0839319	0.078046	0.0769485	0.0702601	0.0672044	0.0471672	0.0440292	0.0686493	0.0645822	0.163407	0.166279	0.149858	0.151968	0.164155	0.17532	0.13509	0.140279	0.136553	0.136451	0.141952	0.143777	0.0843217	0.0791446	0.0922645	0.0919561	0.0507757	0.0564386	0.10391	0.104779	0.0330496	0.0348736	0.139166	0.125371	0.105385	0.114769	0.0854679	0.0766763	0.0933608	0.0924411	0.211119	0.247876	0.197736	0.248003	0.247799	0.224816	0.0588137
616	0.0763421	0.0780025	0.0786284	0.0838324	0.0780194	0.0768514	0.0704109	0.067309	0.0473198	0.0441175	0.0687912	0.0648014	0.16332	0.166186	0.149763	0.151838	0.163999	0.175145	0.13502	0.140165	0.1364	0.136353	0.14182	0.143676	0.0843934	0.0792561	0.092395	0.0920943	0.0508527	0.0565543	0.103924	0.104763	0.0331373	0.0350016	0.139211	0.125422	0.105305	0.114625	0.0855356	0.0766282	0.0932547	0.0922174	0.210635	0.247365	0.197446	0.247363	0.247409	0.22438	0.0588417
617	0.0763569	0.0779915	0.0785754	0.0837262	0.0779886	0.076749	0.0705542	0.0674071	0.0474673	0.0442005	0.0689239	0.0650115	0.163225	0.166083	0.149661	0.151701	0.163835	0.174962	0.13494	0.140043	0.136238	0.136246	0.141677	0.143565	0.0844562	0.0793592	0.0925157	0.0922233	0.0509225	0.0566621	0.103927	0.104735	0.0332187	0.0351237	0.139244	0.125463	0.105218	0.114479	0.0855974	0.0765756	0.0931416	0.0919898	0.210144	0.246846	0.19715	0.246717	0.247013	0.223938	0.0588619
618	0.0763618	0.0779721	0.0785141	0.0836153	0.0779531	0.0766432	0.0706875	0.0674965	0.0476075	0.0442772	0.0690457	0.0652094	0.16312	0.165971	0.149551	0.151559	0.163662	0.174771	0.134851	0.139913	0.136067	0.13613	0.141526	0.143444	0.0845094	0.079453	0.0926254	0.0923413	0.0509849	0.0567607	0.103918	0.104696	0.0332924	0.0352378	0.139262	0.125493	0.105123	0.114331	0.0856503	0.0765182	0.0930212	0.0917598	0.209645	0.246316	0.196844	0.246065	0.246604	0.223487	0.0588735
619	0.0763564	0.0779454	0.0784451	0.0835017	0.0779122	0.0765359	0.0708085	0.0675751	0.0477383	0.0443465	0.0691545	0.0653921	0.163006	0.165849	0.149434	0.151411	0.16348	0.174572	0.13475	0.139774	0.13589	0.136005	0.141366	0.143314	0.0845525	0.0795369	0.0927228	0.0924464	0.0510394	0.0568492	0.103899	0.104644	0.0333569	0.0353417	0.139264	0.125509	0.105018	0.114182	0.0856917	0.0764556	0.0928929	0.0915288	0.209141	0.245774	0.196525	0.245407	0.246181	0.223028	0.0588756
620	0.0763406	0.0779122	0.0783692	0.0833872	0.0778653	0.076429	0.070915	0.067641	0.0478575	0.0444073	0.0692483	0.0655567	0.162882	0.165718	0.149311	0.151257	0.163287	0.174364	0.134638	0.139627	0.135709	0.135872	0.141201	0.143175	0.0845847	0.07961	0.0928067	0.0925368	0.0510857	0.0569265	0.103868	0.10458	0.0334109	0.0354336	0.139247	0.125511	0.104901	0.114032	0.0857187	0.0763874	0.0927564	0.0912983	0.208631	0.245218	0.196191	0.244745	0.245737	0.222559	0.0588673
621	0.0763138	0.0778738	0.0782873	0.083274	0.0778119	0.0763242	0.0710045	0.067692	0.0479628	0.0444584	0.0693253	0.0657002	0.162747	0.165578	0.149181	0.151099	0.163084	0.174149	0.134515	0.139473	0.135525	0.135731	0.141032	0.143029	0.0846054	0.0796714	0.0928757	0.0926107	0.0511234	0.0569915	0.103825	0.104502	0.0334528	0.0355112	0.139208	0.125498	0.104772	0.113881	0.0857284	0.0763133	0.0926113	0.0910697	0.208116	0.244646	0.19584	0.244077	0.24527	0.222079	0.0588478
622	0.076276	0.077831	0.0782	0.0831641	0.0777513	0.0762237	0.0710747	0.0677261	0.0480522	0.0444988	0.0693833	0.0658197	0.162601	0.16543	0.149044	0.150935	0.162869	0.173925	0.134378	0.13931	0.135339	0.135584	0.140859	0.142875	0.0846139	0.0797203	0.0929286	0.0926662	0.0511523	0.057043	0.103771	0.104412	0.0334813	0.0355726	0.139146	0.125467	0.104628	0.113732	0.085718	0.076233	0.092457	0.0908445	0.207595	0.244056	0.195468	0.243404	0.244774	0.221587	0.0588163
623	0.0762266	0.0777849	0.078108	0.0830592	0.0776831	0.0761291	0.0711233	0.0677411	0.0481233	0.0445274	0.0694205	0.065912	0.162444	0.165272	0.148901	0.150767	0.162642	0.173692	0.134229	0.139141	0.135155	0.13543	0.140686	0.142715	0.0846096	0.079756	0.0929643	0.0927015	0.0511719	0.0570802	0.103706	0.104308	0.0334949	0.0356158	0.139058	0.125419	0.104468	0.113583	0.0856847	0.076146	0.0922933	0.0906241	0.207071	0.243446	0.195072	0.242727	0.244246	0.221082	0.0587719
624	0.0761655	0.0777366	0.0780122	0.0829616	0.0776065	0.0760425	0.071148	0.0677352	0.0481741	0.0445429	0.0694348	0.0659742	0.162275	0.165107	0.148753	0.150594	0.162403	0.173451	0.134066	0.138964	0.134974	0.135271	0.140513	0.142549	0.0845918	0.0797777	0.0929814	0.0927147	0.051182	0.0571018	0.103628	0.104189	0.0334922	0.0356385	0.138942	0.125351	0.10429	0.113436	0.0856258	0.076052	0.0921196	0.0904099	0.206543	0.242816	0.194651	0.242045	0.243682	0.220563	0.0587138
625	0.0760923	0.077687	0.0779133	0.0828731	0.0775209	0.0759657	0.0711464	0.0677061	0.0482024	0.0445445	0.0694243	0.0660035	0.162093	0.164933	0.148599	0.150417	0.16215	0.173201	0.133888	0.138781	0.134797	0.135106	0.140342	0.142378	0.0845599	0.0797844	0.0929786	0.0927042	0.0511821	0.0571069	0.103539	0.104056	0.0334718	0.0356389	0.138796	0.125262	0.104093	0.113291	0.0855383	0.0759506	0.0919356	0.0902033	0.206012	0.242162	0.194201	0.241359	0.243077	0.22003	0.0586411
626	0.0759936	0.077633	0.0778006	0.0827895	0.0774246	0.0758978	0.0711172	0.067651	0.0482098	0.0445341	0.069387	0.0659961	0.161908	0.164756	0.148448	0.150235	0.161874	0.172943	0.133694	0.138599	0.134625	0.134934	0.140174	0.142202	0.0845046	0.079778	0.0929576	0.092668	0.051172	0.0570951	0.103435	0.103889	0.0334244	0.0356093	0.138619	0.125143	0.103884	0.113164	0.0854308	0.0758495	0.091745	0.0899974	0.205461	0.241474	0.193713	0.240664	0.24243	0.219479	0.0585377
627	0.0758608	0.0775706	0.0776656	0.0827046	0.0773168	0.0758351	0.0710635	0.0675708	0.0482012	0.044515	0.0693244	0.0659546	0.161725	0.16458	0.148303	0.150046	0.161567	0.172678	0.133484	0.138425	0.134454	0.13475	0.140007	0.142019	0.0844205	0.0797609	0.0929212	0.0926081	0.0511521	0.057068	0.103314	0.103673	0.0333462	0.035548	0.138412	0.12499	0.103666	0.113064	0.0853132	0.0757541	0.091551	0.0897849	0.204878	0.24075	0.193185	0.239957	0.241746	0.21891	0.0583936
628	0.0757003	0.0774994	0.0775119	0.0826174	0.0771993	0.0757749	0.0709889	0.0674696	0.0481787	0.0444875	0.0692402	0.065885	0.161541	0.164402	0.148161	0.14985	0.161235	0.172404	0.133259	0.138253	0.134282	0.134554	0.139838	0.141829	0.0843126	0.0797332	0.0928703	0.0925277	0.051123	0.0570271	0.103178	0.103421	0.033244	0.0354615	0.13818	0.124809	0.103441	0.112983	0.0851853	0.0756611	0.0913521	0.0895673	0.204271	0.239995	0.192626	0.239239	0.241033	0.218327	0.0582175
629	0.0755188	0.0774193	0.0773433	0.0825268	0.0770735	0.0757149	0.0708973	0.0673515	0.0481447	0.0444518	0.0691378	0.0657932	0.161354	0.164219	0.148016	0.149648	0.160884	0.172122	0.133022	0.138079	0.134105	0.134347	0.139664	0.14163	0.0841861	0.0796952	0.0928059	0.0924304	0.0510853	0.0569741	0.103027	0.103141	0.0331246	0.0353565	0.137927	0.124607	0.103206	0.112913	0.0850468	0.075567	0.0911468	0.089346	0.203647	0.239219	0.192044	0.238514	0.240297	0.217731	0.0580179
630	0.0753229	0.0773302	0.0771634	0.0824318	0.076941	0.0756526	0.0707925	0.0672204	0.0481015	0.0444082	0.069021	0.0656852	0.161159	0.164028	0.147864	0.149438	0.160519	0.171831	0.132773	0.137897	0.133921	0.134128	0.139481	0.141418	0.0840459	0.0796469	0.0927287	0.0923194	0.0510397	0.0569105	0.102864	0.102844	0.0329946	0.0352397	0.137657	0.124391	0.102961	0.112844	0.0848973	0.0754684	0.0909336	0.0891224	0.203014	0.238429	0.191448	0.237782	0.239547	0.217125	0.0578034
631	0.0751192	0.0772319	0.076976	0.0823315	0.0768033	0.0755853	0.0706784	0.0670803	0.0480512	0.0443571	0.0688934	0.0655671	0.160955	0.163826	0.1477	0.14922	0.160146	0.17153	0.132514	0.137702	0.133726	0.133897	0.139288	0.141194	0.0838971	0.0795885	0.0926396	0.0921982	0.0509868	0.056838	0.102689	0.10254	0.0328607	0.0351177	0.137373	0.124166	0.102705	0.112769	0.0847365	0.0753619	0.0907111	0.0888979	0.202379	0.237634	0.190846	0.237046	0.23879	0.216513	0.0575827
632	0.0749142	0.0771241	0.0767848	0.0822248	0.076662	0.0755106	0.0705588	0.0669353	0.0479961	0.0442986	0.0687584	0.0654447	0.160737	0.163611	0.14752	0.148995	0.15977	0.171219	0.132247	0.13749	0.133517	0.133655	0.139081	0.140955	0.0837449	0.0795202	0.0925396	0.0920701	0.0509272	0.0567581	0.102504	0.102239	0.0327297	0.0349971	0.137079	0.12394	0.102437	0.112679	0.0845642	0.075244	0.0904777	0.0886738	0.201748	0.236841	0.190247	0.236309	0.238032	0.215897	0.0573642
633	0.0747146	0.0770066	0.0765934	0.0821108	0.0765186	0.075426	0.0704375	0.0667894	0.0479386	0.0442332	0.0686197	0.0653242	0.160504	0.16338	0.147319	0.148761	0.159397	0.170898	0.131974	0.137255	0.133291	0.1334	0.138858	0.1407	0.0835942	0.0794421	0.0924295	0.0919386	0.0508616	0.0566724	0.102311	0.101951	0.0326083	0.0348845	0.136779	0.123718	0.102156	0.112565	0.08438	0.0751114	0.0902321	0.0884516	0.20113	0.236057	0.189658	0.235572	0.237282	0.21528	0.0571565
634	0.0745269	0.0768793	0.0764056	0.0819883	0.0763746	0.0753289	0.0703182	0.0666464	0.0478808	0.044161	0.0684808	0.0652113	0.160251	0.16313	0.147092	0.148518	0.159033	0.170566	0.131695	0.136993	0.133046	0.133133	0.138615	0.140425	0.0834501	0.0793545	0.0923101	0.091807	0.0507906	0.0565826	0.10211	0.101687	0.0325032	0.0347866	0.136477	0.123507	0.101861	0.11242	0.0841836	0.0749606	0.0899726	0.0882326	0.200532	0.235291	0.189089	0.234837	0.236545	0.214664	0.0569682
635	0.0743578	0.076742	0.076225	0.0818565	0.0762316	0.075217	0.0702049	0.0665105	0.047825	0.0440824	0.0683454	0.0651122	0.159976	0.162858	0.146835	0.148266	0.158682	0.170223	0.131412	0.136698	0.132778	0.132854	0.138349	0.140131	0.0833177	0.0792574	0.0921824	0.0916788	0.0507149	0.0564902	0.101904	0.101455	0.032421	0.0347099	0.136176	0.123314	0.10155	0.112233	0.0839747	0.0747882	0.0896979	0.0880182	0.19996	0.23455	0.188547	0.234107	0.235829	0.214052	0.0568077
636	0.0741783	0.0765772	0.076027	0.0817013	0.0760566	0.075079	0.0700776	0.0663614	0.04776	0.0439908	0.0681921	0.0650014	0.159665	0.162562	0.146545	0.148002	0.15832	0.169855	0.131106	0.136361	0.132492	0.132556	0.138069	0.139813	0.0831803	0.0791369	0.0920307	0.0915334	0.0506274	0.0563815	0.101679	0.101229	0.0323397	0.0346266	0.135841	0.123111	0.101215	0.112022	0.0837334	0.0745868	0.0893913	0.0878125	0.199403	0.233812	0.188006	0.233386	0.235104	0.213429	0.056649
637	0.0739616	0.0763735	0.0757908	0.0815149	0.0758263	0.0749106	0.069919	0.066181	0.0476759	0.0438813	0.0680025	0.0648551	0.159315	0.162245	0.146224	0.147723	0.157923	0.169454	0.130761	0.135984	0.132199	0.132234	0.137784	0.139472	0.0830207	0.0789837	0.0918435	0.0913534	0.0505226	0.0562454	0.101423	0.100977	0.0322366	0.0345105	0.135444	0.122874	0.100848	0.111806	0.083447	0.074355	0.0890435	0.0876159	0.198846	0.233054	0.187438	0.232676	0.234343	0.212781	0.0564647
638	0.0737173	0.0761399	0.0755265	0.081305	0.0755562	0.0747194	0.0697361	0.0659767	0.0475766	0.0437575	0.0677846	0.0646815	0.158933	0.16191	0.145878	0.147432	0.1575	0.169028	0.130387	0.135574	0.131895	0.131893	0.137491	0.139111	0.0828438	0.0788048	0.0916285	0.0911468	0.0504035	0.0560878	0.101143	0.100706	0.0321175	0.0343707	0.135	0.122611	0.100457	0.111583	0.0831261	0.0740989	0.0886642	0.0874249	0.198289	0.232281	0.18685	0.231971	0.233556	0.212114	0.056261
639	0.0734551	0.0758855	0.0752442	0.0810792	0.0752623	0.0745128	0.069536	0.065756	0.0474662	0.0436228	0.0675466	0.0644885	0.158528	0.16156	0.145512	0.147131	0.157058	0.168582	0.129993	0.135141	0.131581	0.131537	0.137188	0.138735	0.0826542	0.0786073	0.0913931	0.0909216	0.0502731	0.0559144	0.100845	0.100422	0.0319885	0.0342162	0.134525	0.122331	0.100049	0.111351	0.0827813	0.0738244	0.0882629	0.0872357	0.197732	0.2315	0.18625	0.231269	0.232751	0.211434	0.0560442
640	0.0731848	0.0756192	0.074954	0.0808454	0.0749603	0.0742983	0.0693261	0.0655264	0.0473487	0.0434806	0.0672963	0.0642844	0.158109	0.161197	0.145132	0.146824	0.156608	0.168124	0.129587	0.134693	0.131256	0.13117	0.136873	0.138346	0.0824564	0.0783982	0.0911447	0.0906855	0.0501342	0.0557309	0.100536	0.100132	0.0318554	0.0340563	0.134034	0.122042	0.09963	0.111108	0.082423	0.0735375	0.0878493	0.0870445	0.197176	0.230716	0.185645	0.230565	0.231939	0.210746	0.0558204
641	0.0729161	0.0753499	0.0746657	0.0806113	0.0746659	0.0740835	0.0691133	0.0652952	0.0472282	0.0433343	0.0670417	0.0640772	0.157685	0.160824	0.144744	0.146511	0.156158	0.167661	0.12918	0.13424	0.13092	0.130797	0.136545	0.137949	0.0822553	0.0781846	0.0908909	0.0904467	0.0499899	0.0555432	0.100221	0.0998423	0.031724	0.0339	0.133543	0.121753	0.0992065	0.110852	0.0820619	0.0732441	0.0874329	0.0868476	0.19662	0.229935	0.185043	0.229854	0.231129	0.210056	0.0555961
642	0.0726585	0.0750867	0.0743896	0.0803846	0.0743948	0.0738758	0.0689048	0.0650698	0.0471086	0.0431873	0.0667909	0.0638751	0.157264	0.160444	0.144352	0.146197	0.155716	0.167199	0.12878	0.133791	0.13057	0.130421	0.136201	0.137548	0.0820555	0.0779736	0.0906392	0.0902128	0.0498431	0.055357	0.0999065	0.0995602	0.0316004	0.0337563	0.133066	0.121471	0.0987851	0.11058	0.0817083	0.0729501	0.0870232	0.0866413	0.196066	0.229162	0.184451	0.229132	0.230331	0.209369	0.0553773
643	0.0724219	0.0748386	0.0741355	0.080173	0.0741629	0.0736828	0.0687078	0.0648577	0.0469939	0.043043	0.0665518	0.0636861	0.156855	0.16006	0.143962	0.145883	0.15529	0.166745	0.128397	0.133353	0.130208	0.130046	0.135839	0.137146	0.0818617	0.0777723	0.090397	0.089992	0.0496967	0.0551781	0.0995991	0.0992919	0.0314903	0.0336344	0.132619	0.121206	0.0983724	0.110292	0.0813727	0.0726616	0.0866298	0.086422	0.195513	0.228404	0.183877	0.228395	0.229553	0.208691	0.0551704
644	0.0722159	0.0746145	0.0739136	0.0799844	0.0739859	0.0735119	0.0685293	0.0646661	0.0468883	0.0429048	0.0663324	0.0635183	0.156466	0.159675	0.14358	0.145572	0.154891	0.166306	0.128039	0.132937	0.129831	0.129678	0.135457	0.136748	0.0816784	0.0775877	0.0901718	0.089792	0.0495536	0.0550123	0.0993045	0.0990439	0.0313997	0.0335433	0.132216	0.120965	0.0979749	0.109983	0.0810656	0.0723842	0.086262	0.0861859	0.194961	0.227664	0.183327	0.22764	0.228807	0.208028	0.0549814
645	0.0720228	0.0743899	0.0737009	0.0798018	0.0738373	0.0733468	0.0683542	0.0644819	0.0467838	0.0427615	0.0661105	0.0633541	0.156064	0.159265	0.143186	0.145258	0.154506	0.16586	0.127681	0.132501	0.129416	0.129293	0.135029	0.136324	0.081496	0.077393	0.0899322	0.0895891	0.0493965	0.0548361	0.0989982	0.0988083	0.0313216	0.0334746	0.131812	0.120734	0.0975588	0.109641	0.0807471	0.0720904	0.0858749	0.0859449	0.194428	0.226946	0.182805	0.226882	0.228084	0.207373	0.0548036
646	0.0718202	0.0741387	0.0734709	0.0796057	0.073682	0.0731685	0.0681644	0.0642878	0.0466706	0.0426017	0.0658626	0.0631725	0.155616	0.15881	0.142762	0.144936	0.15412	0.165382	0.127295	0.132008	0.128946	0.128871	0.134539	0.135849	0.0813026	0.0771625	0.0896487	0.0893582	0.0492101	0.0546275	0.0986566	0.0985725	0.0312447	0.0334126	0.131357	0.120491	0.0970945	0.109256	0.0803792	0.0717553	0.0854283	0.0857115	0.193925	0.226241	0.182303	0.226138	0.227369	0.206714	0.0546259
647	0.0716106	0.0738677	0.0732288	0.0794002	0.0735225	0.0729809	0.0679622	0.0640855	0.0465494	0.0424287	0.0655942	0.0629764	0.155133	0.158319	0.142314	0.144606	0.153732	0.164881	0.126889	0.131473	0.128435	0.128422	0.134003	0.135337	0.0811004	0.0769046	0.0893315	0.0891053	0.0490013	0.0543939	0.0982878	0.0983359	0.0311682	0.033355	0.130863	0.12024	0.096594	0.10884	0.0799742	0.0713893	0.0849382	0.0854832	0.193444	0.225546	0.181816	0.225403	0.22666	0.206052	0.0544485
648	0.0713965	0.0735836	0.0729797	0.0791889	0.0733615	0.0727876	0.06775	0.0638765	0.0464211	0.0422457	0.0653109	0.0627686	0.154625	0.157804	0.141848	0.14427	0.153341	0.164364	0.126468	0.13091	0.127896	0.127954	0.133434	0.134799	0.0808913	0.0766276	0.0889908	0.0888366	0.0487768	0.054143	0.0978999	0.0980981	0.0310912	0.0332995	0.130344	0.119981	0.0960695	0.108402	0.0795448	0.0710031	0.0844206	0.0852575	0.192976	0.224854	0.181337	0.224671	0.22595	0.205386	0.0542713
649	0.0711806	0.0732934	0.0727286	0.0789758	0.0732016	0.0725925	0.0675301	0.0636621	0.0462863	0.042056	0.0650181	0.062552	0.154103	0.157274	0.141371	0.14393	0.152949	0.163837	0.126038	0.130333	0.127343	0.127476	0.132848	0.134248	0.0806772	0.07634	0.0886371	0.0885581	0.0485434	0.0538821	0.0975008	0.0978586	0.031013	0.0332441	0.129813	0.119717	0.0955329	0.10795	0.0791033	0.0706071	0.0838914	0.0850318	0.192511	0.224162	0.180857	0.223936	0.225237	0.204716	0.0540945
650	0.0709654	0.0730037	0.0724805	0.0787648	0.0730453	0.0723994	0.0673051	0.0634441	0.046146	0.0418628	0.0647213	0.0623294	0.153578	0.156739	0.14089	0.143586	0.152556	0.163309	0.125607	0.129755	0.126789	0.126997	0.13226	0.133696	0.0804601	0.0760501	0.0882805	0.0882759	0.0483076	0.053619	0.0970985	0.0976169	0.0309327	0.0331865	0.129281	0.119449	0.0949962	0.107496	0.0786622	0.0702116	0.0833667	0.0848037	0.192042	0.223463	0.180372	0.223193	0.224516	0.204042	0.053918
651	0.0707533	0.0727214	0.0722406	0.0785597	0.0728955	0.072212	0.0670772	0.0632238	0.0460007	0.0416694	0.0644261	0.0621036	0.153061	0.156208	0.14041	0.143241	0.15216	0.162787	0.12518	0.129192	0.126247	0.126526	0.131685	0.133156	0.080242	0.0757663	0.0879314	0.0879961	0.0480764	0.0533611	0.0967009	0.0973725	0.0308497	0.0331244	0.128761	0.119179	0.0944713	0.107048	0.0782338	0.0698269	0.0828621	0.0845707	0.191559	0.222754	0.179874	0.222436	0.223783	0.203364	0.0537419
652	0.070547	0.0724532	0.0720139	0.0783643	0.0727546	0.0720341	0.0668488	0.0630028	0.0458514	0.041479	0.0641378	0.0618775	0.152562	0.155692	0.13994	0.142894	0.151762	0.162277	0.124763	0.128658	0.125732	0.126071	0.131137	0.132639	0.0800247	0.075497	0.0876	0.0877248	0.0478564	0.053116	0.096316	0.097125	0.030763	0.0330557	0.128266	0.118909	0.0939702	0.106616	0.0778303	0.0694636	0.0823935	0.0843302	0.191055	0.222028	0.179357	0.221662	0.223035	0.202681	0.0535662
653	0.0703489	0.0722059	0.0718055	0.0781826	0.0726253	0.0718695	0.0666223	0.0627825	0.0456988	0.0412948	0.063862	0.0616539	0.152092	0.155201	0.139484	0.142548	0.151363	0.161786	0.124364	0.128166	0.125256	0.125641	0.130632	0.132157	0.0798104	0.0752506	0.0872966	0.0874681	0.0476543	0.0528912	0.0959517	0.0968738	0.0306718	0.0329781	0.127808	0.118641	0.0935046	0.10621	0.0774641	0.0691318	0.0819765	0.0840797	0.19052	0.221281	0.178813	0.220863	0.222266	0.201992	0.0533911
654	0.0701617	0.0719864	0.0716204	0.0780184	0.0725102	0.0717219	0.0664001	0.0625645	0.0455436	0.0411201	0.063604	0.0614356	0.151662	0.154744	0.13905	0.142204	0.150962	0.161323	0.123987	0.127731	0.124832	0.125246	0.130184	0.131724	0.0796009	0.0750355	0.0870316	0.087232	0.0474769	0.0526943	0.0956157	0.0966185	0.0305754	0.0328895	0.1274	0.118377	0.0930863	0.105838	0.0771474	0.0688418	0.0816267	0.0838167	0.189946	0.220508	0.178237	0.220035	0.221474	0.201299	0.0532165
655	0.0699831	0.0717862	0.0714533	0.0778691	0.0724276	0.0715892	0.0661824	0.0623479	0.0453745	0.040937	0.0633444	0.0612082	0.151254	0.154291	0.13861	0.141854	0.150564	0.160867	0.12363	0.127335	0.12443	0.124863	0.129758	0.131313	0.0793888	0.0748369	0.0867841	0.0870026	0.0473073	0.0525067	0.0952907	0.0963641	0.0304802	0.032796	0.127019	0.118117	0.092682	0.105463	0.0768516	0.0685645	0.0813183	0.0835416	0.189356	0.21973	0.177648	0.219184	0.220678	0.200602	0.0530421
656	0.0698087	0.0715918	0.0712947	0.0777285	0.0723861	0.0714654	0.0659667	0.0621306	0.0451834	0.0407301	0.0630643	0.0609594	0.150846	0.15381	0.138136	0.141491	0.150174	0.160395	0.12328	0.126951	0.124012	0.124467	0.129315	0.130891	0.0791672	0.0746352	0.0865286	0.0867638	0.0471264	0.0523075	0.0949557	0.0961146	0.0303911	0.0327042	0.126638	0.11786	0.0922561	0.105048	0.0765437	0.0682689	0.0810155	0.0832573	0.188776	0.218966	0.177069	0.218321	0.219894	0.199905	0.0528677
657	0.0696376	0.0714021	0.0711433	0.0775949	0.0723736	0.0713486	0.0657512	0.0619117	0.044976	0.0405065	0.06277	0.060695	0.150438	0.15331	0.137638	0.141118	0.149788	0.159913	0.122936	0.126575	0.123585	0.124064	0.128862	0.130462	0.0789383	0.0744315	0.086268	0.0865183	0.0469381	0.0521006	0.094614	0.0958677	0.0303057	0.0326128	0.126257	0.117603	0.0918168	0.104606	0.0762291	0.0679624	0.0807194	0.082966	0.188199	0.21821	0.176494	0.217447	0.219118	0.199206	0.0526934
658	0.0694692	0.0712163	0.0709977	0.0774666	0.0723783	0.0712368	0.0655339	0.0616906	0.044758	0.040273	0.0624678	0.0604208	0.15003	0.152799	0.137128	0.140738	0.149403	0.159426	0.122594	0.126206	0.123153	0.123656	0.128403	0.130031	0.0787046	0.0742272	0.0860051	0.0862687	0.046746	0.0518901	0.0942687	0.0956215	0.0302213	0.0325203	0.125878	0.117347	0.0913723	0.104151	0.075913	0.0676523	0.0804313	0.0826695	0.18762	0.217453	0.175917	0.216563	0.21834	0.198504	0.0525195
659	0.0693026	0.0710333	0.0708567	0.0773419	0.072388	0.0711284	0.0653128	0.0614664	0.0445349	0.0400366	0.0621641	0.0601425	0.149623	0.152286	0.136614	0.140354	0.149017	0.158939	0.122253	0.125841	0.122724	0.123249	0.127947	0.129601	0.0784685	0.0740234	0.0857427	0.086018	0.0465538	0.0516801	0.0939228	0.0953737	0.0301353	0.0324254	0.125504	0.117087	0.0909307	0.103695	0.0756008	0.067346	0.0801521	0.0823698	0.187035	0.216689	0.175333	0.21567	0.217556	0.197799	0.0523463
660	0.0691371	0.0708522	0.070719	0.0772192	0.0723908	0.0710213	0.065086	0.0612385	0.0443125	0.0398042	0.0618651	0.059866	0.149218	0.15178	0.136107	0.13997	0.148625	0.158458	0.121909	0.125476	0.122303	0.122846	0.1275	0.129176	0.0782323	0.0738214	0.0854838	0.0857689	0.0463653	0.0514746	0.0935793	0.0951223	0.030045	0.0323266	0.125136	0.116824	0.0905002	0.103253	0.075298	0.0670508	0.0798831	0.0820688	0.186438	0.215912	0.174736	0.21477	0.216757	0.197089	0.0521738
661	0.068972	0.0706719	0.0705832	0.0770966	0.0723748	0.0709138	0.0648516	0.061006	0.0440964	0.0395828	0.061577	0.0595968	0.148815	0.15129	0.135615	0.139588	0.148226	0.157988	0.121561	0.12511	0.121896	0.122451	0.127067	0.12876	0.0779986	0.0736223	0.0852313	0.0855241	0.0461842	0.0512775	0.0932415	0.0948652	0.0299479	0.0322226	0.124775	0.116554	0.0900888	0.102837	0.0750096	0.066774	0.0796252	0.0817685	0.185823	0.215114	0.174122	0.213863	0.215937	0.196375	0.0520023
662	0.0688064	0.0704915	0.070448	0.0769725	0.0723279	0.070804	0.0646078	0.0607683	0.0438921	0.0393792	0.0613063	0.0593409	0.148415	0.150824	0.135151	0.139211	0.147816	0.157535	0.121204	0.12474	0.121509	0.12207	0.126656	0.128358	0.0777697	0.0734275	0.0849879	0.0852865	0.0460141	0.051093	0.0929123	0.0946002	0.0298414	0.0321119	0.124423	0.116278	0.0897045	0.102461	0.0747412	0.0665229	0.0793798	0.0814708	0.185186	0.214289	0.173484	0.212952	0.215089	0.195654	0.0518321
663	0.0686397	0.07031	0.0703123	0.0768452	0.0722382	0.07069	0.0643525	0.0605246	0.0437053	0.0392003	0.061059	0.0591038	0.148019	0.150392	0.134722	0.138843	0.147392	0.157103	0.120838	0.124363	0.121147	0.121705	0.126273	0.127972	0.077548	0.073238	0.0847565	0.0850587	0.0458589	0.0509251	0.0925948	0.0943253	0.0297228	0.0319931	0.124082	0.115991	0.0893556	0.102137	0.0744978	0.0663047	0.0791477	0.0811776	0.184522	0.21343	0.172818	0.212037	0.214208	0.194927	0.0516634
664	0.0684733	0.0701304	0.0701783	0.0767191	0.0721271	0.0705757	0.064089	0.0602752	0.0435247	0.0390327	0.0608243	0.0588743	0.147627	0.149978	0.13431	0.138477	0.146959	0.156684	0.120466	0.123987	0.120804	0.121351	0.125911	0.127597	0.0773291	0.0730529	0.0845331	0.0848368	0.0457131	0.0507682	0.0922841	0.0940439	0.029596	0.0318659	0.12375	0.115697	0.0890285	0.101844	0.0742718	0.0661079	0.0789308	0.0808856	0.183838	0.212547	0.172131	0.211115	0.213302	0.194195	0.0514961
665	0.0683092	0.0699555	0.0700491	0.0765986	0.0720226	0.0704659	0.0638217	0.0600212	0.0433365	0.0388596	0.0605879	0.0586383	0.14724	0.149562	0.13389	0.138108	0.146524	0.156264	0.120095	0.123618	0.120467	0.120997	0.125558	0.127225	0.0771074	0.0728701	0.0843114	0.084615	0.0455691	0.0506142	0.0919735	0.0937606	0.0294667	0.031732	0.123425	0.115399	0.0887051	0.101554	0.0740517	0.0659163	0.0787286	0.0805902	0.183146	0.211655	0.171436	0.210185	0.212388	0.193459	0.0513301
666	0.0681471	0.0697841	0.0699242	0.0764825	0.0719225	0.0703594	0.0635504	0.059763	0.0431427	0.0386829	0.0603508	0.0583979	0.146855	0.149146	0.133464	0.137735	0.146085	0.155844	0.119724	0.123254	0.120134	0.120644	0.125212	0.126855	0.0768832	0.0726891	0.0840915	0.0843934	0.0454266	0.0504627	0.0916631	0.0934755	0.0293349	0.0315929	0.123105	0.115097	0.0883863	0.101265	0.0738375	0.0657301	0.0785391	0.0802916	0.182447	0.210754	0.170732	0.209246	0.211465	0.192719	0.051165
667	0.0679866	0.0696153	0.069803	0.0763694	0.0718244	0.0702552	0.0632752	0.0595012	0.0429451	0.0385045	0.0601139	0.058155	0.146472	0.14873	0.133036	0.137358	0.145644	0.155426	0.119353	0.122893	0.119806	0.120291	0.124871	0.126488	0.0766571	0.0725094	0.0838732	0.0841722	0.0452856	0.0503137	0.0913531	0.0931886	0.0292011	0.0314502	0.12279	0.114791	0.0880725	0.100981	0.0736292	0.0655496	0.0783601	0.0799899	0.181739	0.209844	0.170021	0.2083	0.210533	0.191977	0.0510006
668	0.0678276	0.0694477	0.0696853	0.076258	0.071726	0.0701523	0.0629959	0.0592364	0.0427455	0.0383262	0.0598784	0.0579114	0.14609	0.148317	0.132608	0.136978	0.1452	0.155009	0.118981	0.122534	0.11948	0.11994	0.124534	0.126122	0.0764296	0.0723305	0.0836567	0.0839514	0.0451461	0.050167	0.0910435	0.0928998	0.0290654	0.0313052	0.122481	0.114484	0.0877647	0.1007	0.0734267	0.0653748	0.0781895	0.0796853	0.181023	0.208927	0.169301	0.207345	0.209594	0.19123	0.0508367
669	0.0676697	0.0692803	0.0695703	0.0761471	0.0716251	0.0700498	0.0627123	0.058969	0.0425459	0.0381497	0.0596451	0.0576692	0.145709	0.147906	0.132183	0.136596	0.144752	0.154596	0.118607	0.122174	0.119158	0.11959	0.124199	0.125758	0.0762012	0.072152	0.0834417	0.0837312	0.0450079	0.0500223	0.0907346	0.092609	0.028928	0.0311597	0.122177	0.114174	0.0874634	0.100425	0.0732302	0.0652061	0.0780254	0.079378	0.180299	0.208003	0.168575	0.206384	0.208647	0.190481	0.0506728
670	0.0675127	0.069112	0.0694577	0.0760353	0.0715193	0.0699464	0.0624245	0.0586996	0.0423481	0.0379771	0.0594152	0.0574301	0.145328	0.147498	0.131763	0.136212	0.144301	0.154188	0.118231	0.121812	0.118837	0.119242	0.123863	0.125395	0.0759723	0.0719733	0.0832284	0.0835116	0.0448711	0.0498796	0.0904264	0.0923164	0.0287891	0.031015	0.121876	0.113863	0.0871695	0.100154	0.0730396	0.0650436	0.0778657	0.0790681	0.179567	0.207071	0.16784	0.205416	0.207692	0.189728	0.0505089
671	0.0673563	0.0689416	0.069347	0.0759213	0.0714063	0.0698413	0.0621323	0.0584287	0.0421541	0.0378101	0.0591896	0.0571961	0.144945	0.147096	0.131351	0.135826	0.143847	0.153784	0.117852	0.121445	0.118516	0.118895	0.123526	0.125033	0.0757434	0.071794	0.0830166	0.0832928	0.0447354	0.0497386	0.0901191	0.0920218	0.028649	0.0308727	0.12158	0.113553	0.0868835	0.0998905	0.0728548	0.0648876	0.0777082	0.0787558	0.178826	0.206133	0.167099	0.204442	0.206731	0.188972	0.0503445
672	0.0672002	0.0687679	0.0692376	0.0758038	0.0712839	0.0697335	0.0618357	0.0581568	0.0419656	0.0376504	0.0589694	0.0569691	0.14456	0.146699	0.130949	0.135439	0.143388	0.153386	0.11747	0.121072	0.118196	0.11855	0.123186	0.124672	0.0755151	0.0716136	0.0828064	0.0830749	0.0446009	0.0495993	0.0898129	0.0917252	0.0285079	0.0307343	0.121287	0.113242	0.0866063	0.0996336	0.0726758	0.0647381	0.0775509	0.0784411	0.178077	0.205189	0.166351	0.203463	0.205763	0.188212	0.0501795
673	0.0670441	0.0685899	0.0691291	0.0756816	0.0711498	0.0696218	0.0615345	0.0578844	0.0417845	0.0375001	0.0587554	0.0567511	0.144171	0.146309	0.130561	0.135051	0.142925	0.152995	0.117084	0.120691	0.117875	0.118207	0.12284	0.124312	0.0752877	0.0714315	0.0825976	0.082858	0.0444675	0.0494613	0.0895077	0.0914267	0.028366	0.0306014	0.120997	0.112933	0.0863384	0.0993844	0.0725027	0.0645955	0.0773918	0.0781243	0.177319	0.204239	0.165597	0.202477	0.204788	0.187449	0.0500135
674	0.0668886	0.0684085	0.0690217	0.0755561	0.07101	0.0695073	0.0612297	0.057611	0.0416073	0.0373543	0.0585452	0.0565386	0.143781	0.145921	0.130179	0.13466	0.142459	0.152607	0.116696	0.120303	0.117551	0.117863	0.122489	0.12395	0.0750599	0.0712479	0.0823893	0.0826418	0.0443341	0.0493242	0.0892024	0.0911273	0.0282244	0.0304725	0.120711	0.112624	0.0860763	0.0991378	0.0723338	0.0644568	0.0772327	0.0778044	0.176555	0.203286	0.164839	0.201487	0.20381	0.186684	0.0498469
675	0.0667345	0.0682254	0.0689161	0.0754301	0.0708712	0.0693919	0.0609222	0.0573355	0.0414295	0.0372078	0.0583357	0.0563274	0.14339	0.145533	0.129793	0.134264	0.14199	0.15222	0.116306	0.119913	0.117223	0.117516	0.122135	0.123584	0.0748302	0.0710632	0.0821806	0.082426	0.0442003	0.0491878	0.0888959	0.0908279	0.0280836	0.0303449	0.120429	0.112315	0.0858168	0.0988894	0.072168	0.0643196	0.0770774	0.0774803	0.175785	0.20233	0.164078	0.20049	0.20283	0.185916	0.0496802
676	0.0665816	0.0680414	0.0688127	0.0753038	0.0707324	0.0692759	0.0606116	0.0570578	0.0412513	0.0370615	0.0581275	0.0561175	0.143	0.145144	0.129406	0.133865	0.141519	0.151833	0.115914	0.11952	0.116894	0.117168	0.121778	0.123217	0.0745988	0.070878	0.0819723	0.0822105	0.0440666	0.0490526	0.0885888	0.0905278	0.0279427	0.030218	0.120152	0.112006	0.085561	0.0986414	0.0720063	0.0641854	0.0769268	0.0771526	0.17501	0.20137	0.163312	0.199486	0.201846	0.185146	0.0495134
677	0.06643	0.0678569	0.0687118	0.0751775	0.0705923	0.0691596	0.0602973	0.0567778	0.0410729	0.0369163	0.057921	0.0559088	0.142609	0.144757	0.12902	0.133462	0.141045	0.151449	0.115522	0.119125	0.116565	0.116819	0.121422	0.12285	0.0743662	0.0706927	0.081765	0.0819956	0.0439336	0.048919	0.0882817	0.0902265	0.0278011	0.0300913	0.119879	0.111695	0.0853104	0.0983958	0.0718494	0.0640556	0.0767814	0.0768217	0.174228	0.200404	0.162541	0.198476	0.200856	0.184372	0.0493466
678	0.0662795	0.0676723	0.0686137	0.0750514	0.0704496	0.0690435	0.0599789	0.0564954	0.0408945	0.0367731	0.0577168	0.0557015	0.142218	0.144372	0.128637	0.133057	0.140567	0.151067	0.115127	0.118731	0.116239	0.116472	0.121067	0.122485	0.0741326	0.0705077	0.0815593	0.0817812	0.0438019	0.0487874	0.0879752	0.0899233	0.0276579	0.0299643	0.11961	0.111383	0.0850663	0.0981547	0.0716983	0.0639316	0.0766422	0.0764879	0.173438	0.199432	0.161762	0.19746	0.19986	0.183596	0.0491799
679	0.06613	0.0674884	0.0685188	0.0749257	0.0703032	0.0689279	0.0596561	0.0562105	0.0407165	0.0366328	0.0575153	0.0554956	0.141828	0.143991	0.128258	0.132649	0.140086	0.15069	0.114732	0.118336	0.115917	0.116127	0.120714	0.122122	0.0738984	0.0703234	0.0813558	0.0815675	0.043672	0.0486582	0.0876699	0.0896177	0.0275124	0.0298363	0.119346	0.111069	0.0848299	0.0979199	0.0715538	0.0638146	0.0765098	0.0761517	0.172639	0.198452	0.160976	0.196436	0.198855	0.182816	0.0490131
680	0.0659814	0.0673055	0.0684273	0.0748009	0.0701518	0.0688132	0.0593284	0.055923	0.040539	0.0364963	0.057317	0.0552912	0.141439	0.143616	0.127887	0.132241	0.139601	0.150319	0.114334	0.117942	0.1156	0.115787	0.120367	0.121765	0.073664	0.0701402	0.0811553	0.0813544	0.0435446	0.0485318	0.0873663	0.0893091	0.0273638	0.0297069	0.119088	0.110752	0.0846026	0.0976937	0.0714169	0.0637063	0.076385	0.0758135	0.171831	0.197462	0.160179	0.195406	0.19784	0.182032	0.0488465
681	0.0658337	0.0671241	0.0683396	0.074677	0.0699943	0.0686997	0.0589953	0.0556328	0.0403623	0.0363646	0.0571225	0.0550883	0.141051	0.143247	0.127524	0.131832	0.139112	0.149953	0.113935	0.117551	0.115292	0.115452	0.120026	0.121414	0.0734297	0.0699586	0.0809583	0.081142	0.0434202	0.0484088	0.0870651	0.0889968	0.0272113	0.0295753	0.118834	0.110433	0.0843857	0.0974781	0.0712882	0.0636078	0.0762686	0.0754736	0.171012	0.196462	0.159372	0.194369	0.196813	0.181244	0.0486801
682	0.0656869	0.0669449	0.0682561	0.0745544	0.0698294	0.0685877	0.0586565	0.0553398	0.0401867	0.0362385	0.0569322	0.054887	0.140663	0.142886	0.127172	0.131424	0.138619	0.149595	0.113534	0.117162	0.114993	0.115124	0.119693	0.121071	0.0731959	0.069779	0.0807656	0.0809305	0.0432994	0.0482895	0.0867668	0.0886804	0.0270541	0.0294412	0.118585	0.11011	0.0841804	0.097275	0.0711688	0.0635206	0.0761613	0.0751326	0.170182	0.19545	0.158552	0.193324	0.195773	0.180451	0.0485139
683	0.0655409	0.0667673	0.0681763	0.0744329	0.0696578	0.068477	0.0583122	0.0550441	0.0400118	0.0361172	0.0567457	0.0546872	0.140277	0.142531	0.126828	0.131014	0.138122	0.149244	0.113131	0.116774	0.114703	0.114802	0.119367	0.120734	0.0729622	0.0696009	0.0805763	0.0807196	0.0431818	0.0481735	0.0864709	0.0883604	0.0268929	0.029305	0.118341	0.109784	0.0839857	0.0970829	0.0710578	0.0634437	0.0760623	0.0747903	0.169341	0.194428	0.157721	0.192272	0.194721	0.179654	0.0483479
684	0.0653958	0.0665906	0.0680997	0.0743121	0.0694814	0.068367	0.0579632	0.0547457	0.0398375	0.0359994	0.0565624	0.0544891	0.139891	0.142181	0.126492	0.130604	0.137621	0.148898	0.112726	0.116387	0.114418	0.114483	0.119045	0.120402	0.0727282	0.0694236	0.0803896	0.0805092	0.0430663	0.0480602	0.0861764	0.0880377	0.026729	0.0291675	0.118101	0.109457	0.0837991	0.096899	0.0709535	0.0633749	0.0759704	0.0744461	0.168492	0.193396	0.156881	0.191214	0.19366	0.178854	0.0481822
685	0.0652518	0.0664146	0.0680262	0.074192	0.0693	0.0682577	0.0576095	0.0544448	0.0396637	0.035885	0.0563822	0.0542926	0.139506	0.141837	0.126161	0.130191	0.137116	0.148557	0.112319	0.116	0.114137	0.114167	0.118727	0.120073	0.0724939	0.0692471	0.0802054	0.0802994	0.0429531	0.0479495	0.0858833	0.0877124	0.0265622	0.0290287	0.117866	0.109127	0.0836208	0.0967231	0.0708561	0.0633142	0.0758854	0.0741002	0.167633	0.192356	0.156033	0.19015	0.19259	0.17805	0.0480169
686	0.0651087	0.0662395	0.0679559	0.0740725	0.0691137	0.0681491	0.0572511	0.0541412	0.0394904	0.0357739	0.0562052	0.0540977	0.139121	0.141496	0.125836	0.129778	0.136608	0.148221	0.111911	0.115613	0.113862	0.113854	0.118412	0.119747	0.0722592	0.0690713	0.0800236	0.0800901	0.0428421	0.0478415	0.0855917	0.0873845	0.0263927	0.0288886	0.117635	0.108794	0.0834506	0.0965551	0.0707655	0.0632616	0.0758074	0.0737525	0.166766	0.191308	0.155175	0.189079	0.19151	0.177243	0.0478519
687	0.0649666	0.0660652	0.0678888	0.0739538	0.0689227	0.0680413	0.056888	0.053835	0.0393175	0.0356661	0.0560313	0.0539044	0.138737	0.141161	0.125517	0.129362	0.136096	0.147889	0.1115	0.115226	0.113592	0.113545	0.118102	0.119425	0.0720242	0.0688964	0.0798442	0.0798813	0.0427332	0.0477361	0.0853014	0.087054	0.0262204	0.0287473	0.117409	0.10846	0.0832885	0.0963952	0.0706816	0.0632171	0.0757364	0.073403	0.165889	0.190251	0.154308	0.188002	0.190422	0.176432	0.0476873
688	0.0648256	0.0658917	0.0678249	0.0738358	0.0687269	0.0679341	0.0565202	0.0535262	0.039145	0.0355615	0.0558604	0.0537127	0.138353	0.14083	0.125203	0.128945	0.13558	0.147563	0.111088	0.114839	0.113327	0.113239	0.117796	0.119107	0.0717888	0.0687222	0.0796673	0.0796731	0.0426265	0.0476333	0.0850125	0.086721	0.0260455	0.0286046	0.117188	0.108123	0.0831344	0.096243	0.0706044	0.0631806	0.0756724	0.0730518	0.165004	0.189186	0.153433	0.186919	0.189324	0.175618	0.047523
689	0.0646855	0.065719	0.067764	0.0737185	0.0685264	0.0678277	0.0561478	0.0532148	0.038973	0.0354602	0.0556926	0.0535226	0.13797	0.140504	0.124896	0.128526	0.135061	0.147242	0.110674	0.114451	0.113066	0.112935	0.117493	0.118792	0.071553	0.0685488	0.0794927	0.0794653	0.042522	0.0475332	0.0847249	0.0863854	0.0258678	0.0284607	0.11697	0.107784	0.0829884	0.0960987	0.070534	0.063152	0.0756153	0.0726987	0.164111	0.188113	0.15255	0.185829	0.188218	0.174801	0.047359
690	0.0645464	0.065547	0.0677063	0.073602	0.0683212	0.0677219	0.0557708	0.0529008	0.0388014	0.0353621	0.0555279	0.053334	0.137588	0.140182	0.124594	0.128105	0.134538	0.146925	0.110258	0.114064	0.112811	0.112635	0.117195	0.118481	0.0713168	0.0683761	0.0793205	0.0792581	0.0424196	0.0474356	0.0844386	0.0860474	0.0256875	0.0283156	0.116758	0.107443	0.0828503	0.0959621	0.0704702	0.0631314	0.0755652	0.0723438	0.163209	0.187031	0.151658	0.184734	0.187103	0.17398	0.0471954
691	0.0644084	0.0653758	0.0676518	0.0734861	0.0681114	0.0676169	0.0553891	0.0525842	0.0386302	0.0352671	0.0553662	0.0531469	0.137205	0.139865	0.124297	0.127683	0.134011	0.146613	0.10984	0.113677	0.11256	0.112337	0.1169	0.118173	0.0710801	0.0682041	0.0791506	0.0790515	0.0423193	0.0473407	0.0841537	0.0857068	0.0255045	0.0281692	0.116549	0.1071	0.0827201	0.0958332	0.0704131	0.0631187	0.075522	0.0719872	0.162299	0.185941	0.150757	0.183632	0.18598	0.173156	0.0470321
692	0.0642714	0.0652055	0.0676003	0.073371	0.067897	0.0675125	0.055003	0.052265	0.0384594	0.0351753	0.0552075	0.0529614	0.136824	0.139553	0.124007	0.127259	0.133481	0.146306	0.10942	0.11329	0.112314	0.112043	0.116609	0.117868	0.070843	0.0680329	0.0789831	0.0788453	0.0422211	0.0472483	0.08387	0.0853638	0.0253189	0.0280215	0.116345	0.106755	0.0825977	0.0957119	0.0703626	0.0631138	0.0754857	0.0716287	0.16138	0.184844	0.149848	0.182524	0.184848	0.172328	0.0468691
693	0.0641354	0.0650358	0.067552	0.0732567	0.0676781	0.0674089	0.0546122	0.0519432	0.038289	0.0350865	0.0550518	0.0527774	0.136443	0.139245	0.123721	0.126833	0.132947	0.146004	0.108998	0.112903	0.112073	0.111751	0.116322	0.117567	0.0706055	0.0678624	0.0788179	0.0786397	0.042125	0.0471586	0.0835876	0.0850183	0.0251308	0.0278726	0.116146	0.106407	0.0824831	0.0955982	0.0703187	0.0631167	0.0754563	0.0712683	0.160453	0.183738	0.148931	0.181411	0.183709	0.171498	0.0467065
694	0.0640004	0.064867	0.0675067	0.0731431	0.0674548	0.0673059	0.054217	0.0516188	0.0381189	0.0350007	0.0548991	0.0525949	0.136062	0.138941	0.123441	0.126405	0.132409	0.145706	0.108575	0.112515	0.111836	0.111462	0.116038	0.117268	0.0703675	0.0676926	0.0786549	0.0784346	0.042031	0.0470714	0.0833064	0.0846705	0.02494	0.0277225	0.115951	0.106058	0.0823763	0.095492	0.0702814	0.0631275	0.0754338	0.0709062	0.159518	0.182625	0.148006	0.180292	0.18256	0.170664	0.0465443
695	0.0638665	0.0646989	0.0674646	0.0730303	0.067227	0.0672037	0.0538172	0.0512919	0.0379491	0.0349179	0.0547493	0.0524139	0.135682	0.138642	0.123166	0.125975	0.131868	0.145413	0.108149	0.112128	0.111604	0.111176	0.115758	0.116973	0.070129	0.0675234	0.0784942	0.0782301	0.041939	0.0469867	0.0830264	0.0843202	0.0247467	0.0275711	0.11576	0.105706	0.0822772	0.0953932	0.0702506	0.0631459	0.0754182	0.0705422	0.158575	0.181504	0.147073	0.179166	0.181404	0.169827	0.0463824
696	0.0637337	0.0645315	0.0674255	0.0729182	0.0669948	0.0671021	0.053413	0.0509624	0.0377797	0.0348381	0.0546024	0.0522344	0.135303	0.138347	0.122897	0.125544	0.131323	0.145125	0.107722	0.11174	0.111376	0.110893	0.115482	0.116681	0.0698901	0.067355	0.0783358	0.078026	0.041849	0.0469046	0.0827476	0.0839676	0.0245508	0.0274184	0.115573	0.105352	0.0821858	0.0953018	0.0702263	0.0631721	0.0754095	0.0701764	0.157624	0.180376	0.146132	0.178035	0.18024	0.168987	0.0462208
697	0.0636018	0.0643648	0.0673896	0.0728069	0.0667583	0.0670013	0.0530043	0.0506303	0.0376105	0.0347611	0.0544585	0.0520563	0.134924	0.138056	0.122632	0.125111	0.130774	0.144841	0.107293	0.111352	0.111152	0.110612	0.115209	0.116392	0.0696506	0.0671872	0.0781795	0.0778225	0.0417611	0.0468251	0.08247	0.0836126	0.0243525	0.0272646	0.115392	0.104996	0.082102	0.0952177	0.0702085	0.063206	0.0754077	0.0698087	0.156665	0.17924	0.145184	0.176899	0.179068	0.168144	0.0460596
698	0.0634711	0.0641989	0.0673566	0.0726963	0.0665175	0.0669012	0.0525913	0.0502956	0.0374417	0.0346871	0.0543175	0.0518798	0.134546	0.137769	0.122372	0.124676	0.130222	0.144562	0.106862	0.110964	0.110934	0.110334	0.11494	0.116106	0.0694106	0.06702	0.0780255	0.0776196	0.0416751	0.0467481	0.0821936	0.0832553	0.0241516	0.0271095	0.115214	0.104638	0.0820257	0.0951408	0.0701973	0.0632474	0.0754127	0.0694391	0.155698	0.178097	0.144227	0.175757	0.177889	0.167297	0.0458988
699	0.0633414	0.0640338	0.0673268	0.0725866	0.0662725	0.0668017	0.0521738	0.0499584	0.0372731	0.0346159	0.0541793	0.0517046	0.134168	0.137487	0.122118	0.124239	0.129666	0.144287	0.106429	0.110576	0.110719	0.110058	0.114674	0.115823	0.06917	0.0668536	0.0778736	0.0774171	0.0415912	0.0466736	0.0819183	0.0828957	0.0239483	0.0269532	0.115041	0.104278	0.081957	0.0950712	0.0701924	0.0632965	0.0754246	0.0690677	0.154723	0.176947	0.143263	0.174609	0.176701	0.166448	0.0457383
700	0.0632127	0.0638693	0.0673	0.0724776	0.0660233	0.0667029	0.0517519	0.0496186	0.0371048	0.0345474	0.054044	0.051531	0.13379	0.137209	0.121868	0.1238	0.129106	0.144017	0.105994	0.110187	0.110509	0.109785	0.114412	0.115543	0.068929	0.0666877	0.0777239	0.0772152	0.0415092	0.0466017	0.0816441	0.0825339	0.0237426	0.0267957	0.114872	0.103915	0.0818958	0.0950087	0.070194	0.0633532	0.0754434	0.0686945	0.153741	0.175789	0.142292	0.173456	0.175507	0.165596	0.0455782
[truncated: 95 more columns]
