# Supplementary material for: Structural color in Junonia butterflies evolves by tuning scale lamina thickness
Source: eLife. 2020 Apr 7;9:e52187. doi: 10.7554/eLife.52187 (PMC7138606; doi:10.7554/eLife.52187)
Supplement: Figure 5—source data 1. [file elife-52187-fig5-data1.xlsx]

## Sheet: Sheet1
	Absorbance
	optix mutants - regions of same mosaic wing
	dorsal hindwing cover scales
	nm	WT mean	WT SD	mut mean	mut SD	U	p
	400	0.261551	0.0289595	0.175447	0.0230434	36	0.002165	**
	500	0.242702	0.022268	0.128312	0.0199354	36	0.002165	**
	600	0.188321	0.0159887	0.0906282	0.0181951	36	0.002165	**
	700	0.156797	0.0121801	0.0788644	0.0143444	36	0.002165	**
	dorsal hindwing ground scales
	nm	WT mean	WT SD	mut mean	mut SD	U	p
	400	0.273536	0.0164782	0.321884	0.0261629	1	0.004329	**
	500	0.253383	0.0169801	0.301986	0.0287461	2	0.008658	**
	600	0.191164	0.014146	0.232809	0.0251681	3	0.01515	*
	700	0.158417	0.0118304	0.199979	0.0272343	2	0.008658	**
	ventral hindwing cover scales
	nm	WT mean	WT SD	mut mean	mut SD	U	p
	400	0.122472	0.00963718	0.141801	0.0196834	7	0.09307
	500	0.0580304	0.00719916	0.109221	0.0187344	0	0.002165	**
	600	0.0272205	0.00469509	0.0623413	0.0108115	0	0.002165	**
	700	0.0156363	0.00164894	0.0571341	0.0083229	0	0.002165	**
	dorsal forewing discal bar cover scales
	nm	WT mean	WT SD	mut mean	mut SD	U	p
	400	0.268912	0.0259649	0.212	0.0526305	34	0.008658	**
	500	0.26551	0.0321993	0.169103	0.0503915	36	0.002165	**
	600	0.0670141	0.0116606	0.127501	0.0403843	6	0.06494
	700	0.0310124	0.00971932	0.103574	0.0350385	3	0.01515	*
	Figure 5—source data 1: Comparison of absorbance values for individual scales immersed in refractive index matched oil. Absorbances were compared using the Mann-Whitney U rank sum test, due to unequal variances between several of the comparisons. Mean absorbances are reported with standard deviation (SD), U, and exact p-value for selected wavelengths. Minimum N=6 scales per specimen/treatment, wi…
