# Supplementary material for: Structural color in Junonia butterflies evolves by tuning scale lamina thickness
Source: eLife. 2020 Apr 7;9:e52187. doi: 10.7554/eLife.52187 (PMC7138606; doi:10.7554/eLife.52187)
Supplement: Figure 5—source data 2. [file elife-52187-fig5-data2.xlsx]

## Sheet: Opcover_n6
wl	dorsal_HW_cover_mut_s4_1	dorsal_HW_cover_mut_s4_2	dorsal_HW_cover_mut_s5_1	dorsal_HW_cover_mut_s5_2	dorsal_HW_cover_mut_s6_1	dorsal_HW_cover_mut_s6_2	dorsal_HW_cover_mut_s1_1	dorsal_HW_cover_mut_s1_2	dorsal_HW_cover_mut_s2_1	dorsal_HW_cover_mut_s2_2	dorsal_HW_cover_mut_s3_1	dorsal_HW_cover_mut_s3_2	dorsal_HW_cover_WT_s4_1	dorsal_HW_cover_WT_s4_2	dorsal_HW_cover_WT_s5_1	dorsal_HW_cover_WT_s5_2	dorsal_HW_cover_WT_s6_1	dorsal_HW_cover_WT_s6_2	dorsal_HW_cover_WT_s1_1	dorsal_HW_cover_WT_s1_2	dorsal_HW_cover_WT_s2_1	dorsal_HW_cover_WT_s2_2	dorsal_HW_cover_WT_s3_1	dorsal_HW_cover_WT_s3_2		dorsal_HW_ground_mut_s4_1	dorsal_HW_ground_mut_s4_2	dorsal_HW_ground_mut_s5_1	dorsal_HW_ground_mut_s5_2	dorsal_HW_ground_mut_s6_1	dorsal_HW_ground_mut_s6_2	dorsal_HW_ground_mut_s1_1	dorsal_HW_ground_mut_s1_2	dorsal_HW_ground_mut_s2_1	dorsal_HW_ground_mut_s2_2	dorsal_HW_ground_mut_s3_1	dorsal_HW_ground_mut_s3_2	dorsal_HW_ground_WT_s4_1	dorsal_HW_ground_WT_s4_2	dorsal_HW_ground_WT_s5_1	dorsal_HW_ground_WT_s5_2	dorsal_HW_ground_WT_s6_1	dorsal_HW_ground_WT_s6_2	dorsal_HW_ground_WT_s1_1	dorsal_HW_ground_WT_s1_2	dorsal_HW_ground_WT_s2_1	dorsal_HW_ground_WT_s2_2	dorsal_HW_ground_WT_s3_1	dorsal_HW_ground_WT_s3_2
400	0.165818	0.167467	0.191278	0.201529	0.140105	0.134662	0.172895	0.171745	0.206259	0.196393	0.172679	0.184536	0.245146	0.230052	0.23808	0.23141	0.238745	0.244156	0.270356	0.256516	0.282704	0.294204	0.298261	0.308976		0.279306	0.298974	0.31538	0.304077	0.317746	0.293011	0.333631	0.332448	0.327516	0.333546	0.365593	0.361384	0.300755	0.29923	0.273919	0.272387	0.247861	0.259058	0.264039	0.254841	0.270353	0.278037	0.28351	0.278446
401	0.164999	0.166525	0.190502	0.200472	0.13912	0.133832	0.172159	0.170867	0.205131	0.195302	0.171954	0.183705	0.245447	0.23029	0.238295	0.231687	0.238784	0.243824	0.269777	0.256242	0.283003	0.294096	0.298066	0.308589		0.279557	0.299025	0.315054	0.303826	0.317549	0.29335	0.33383	0.332509	0.32694	0.333105	0.365201	0.36115	0.300351	0.299588	0.273648	0.272217	0.247834	0.259067	0.264065	0.254527	0.270034	0.278056	0.283763	0.278823
402	0.164189	0.165595	0.189735	0.199429	0.138148	0.133012	0.171431	0.17	0.204019	0.194226	0.171237	0.182883	0.24574	0.230523	0.238506	0.231957	0.238819	0.243497	0.269206	0.255969	0.283293	0.293988	0.297871	0.308204		0.279801	0.299072	0.314729	0.303575	0.317356	0.293681	0.334026	0.33257	0.326373	0.332671	0.364818	0.360921	0.299951	0.299937	0.273379	0.272049	0.247803	0.259075	0.264086	0.254216	0.269717	0.27807	0.284007	0.279189
403	0.163389	0.164676	0.188976	0.1984	0.137189	0.132204	0.170711	0.169144	0.202924	0.193168	0.170526	0.182069	0.246022	0.230751	0.238711	0.232219	0.23885	0.243174	0.268643	0.255696	0.283572	0.293877	0.297674	0.307822		0.280037	0.299114	0.314406	0.30332	0.317165	0.294002	0.334219	0.332631	0.325815	0.332243	0.364443	0.360697	0.299553	0.300277	0.273113	0.271882	0.247767	0.259083	0.264102	0.253907	0.269402	0.278079	0.28424	0.279541
404	0.1626	0.163769	0.188224	0.197386	0.136244	0.131409	0.169999	0.168298	0.201846	0.192126	0.169822	0.181263	0.246291	0.230973	0.238912	0.23247	0.238876	0.242855	0.268088	0.255425	0.283839	0.293764	0.297474	0.307441		0.280262	0.29915	0.314081	0.303062	0.316976	0.294313	0.334409	0.332691	0.325266	0.331823	0.364078	0.360478	0.299159	0.300605	0.27285	0.271718	0.247726	0.259091	0.264112	0.253599	0.269087	0.278082	0.284462	0.279879
405	0.161822	0.162875	0.187478	0.196387	0.135314	0.130629	0.169295	0.167463	0.200785	0.1911	0.169124	0.180467	0.246545	0.231187	0.239106	0.23271	0.238896	0.242539	0.267542	0.255153	0.284092	0.293648	0.297271	0.307061		0.280475	0.299179	0.313754	0.3028	0.316789	0.294612	0.334595	0.332748	0.324727	0.33141	0.363723	0.360263	0.298767	0.300923	0.272588	0.271556	0.247678	0.259097	0.264114	0.253291	0.268773	0.278076	0.284671	0.280202
406	0.161056	0.161993	0.186738	0.195404	0.134398	0.129863	0.168599	0.166638	0.199741	0.190091	0.168433	0.179678	0.246782	0.231391	0.239292	0.232936	0.23891	0.242225	0.267004	0.254882	0.284332	0.293527	0.297065	0.306679		0.280676	0.299199	0.313422	0.302531	0.316603	0.294898	0.334778	0.332803	0.3242	0.331007	0.363379	0.360054	0.298379	0.301227	0.272328	0.271396	0.247622	0.259102	0.264107	0.252984	0.268457	0.278061	0.284867	0.280507
407	0.160302	0.161123	0.186004	0.194438	0.133498	0.129113	0.167912	0.165824	0.198715	0.189098	0.167748	0.178899	0.247	0.231585	0.239471	0.233146	0.238917	0.241913	0.266476	0.254611	0.284555	0.293401	0.296854	0.306296		0.280861	0.29921	0.313086	0.302255	0.316418	0.295168	0.334955	0.332854	0.323684	0.330614	0.363047	0.359849	0.297993	0.301517	0.272069	0.271239	0.247557	0.259106	0.264089	0.252675	0.26814	0.278036	0.285048	0.280794
408	0.159561	0.160267	0.185274	0.193489	0.132613	0.12838	0.167232	0.16502	0.197705	0.188122	0.167068	0.178128	0.247197	0.231768	0.239641	0.233339	0.238916	0.241602	0.265957	0.254341	0.284763	0.29327	0.296637	0.305911		0.281031	0.299211	0.312742	0.301971	0.316232	0.295423	0.335128	0.3329	0.323181	0.330231	0.362726	0.359649	0.297611	0.301793	0.271812	0.271084	0.247481	0.259109	0.264059	0.252366	0.267821	0.277999	0.285214	0.281061
409	0.158833	0.159424	0.184548	0.192558	0.131745	0.127665	0.16656	0.164226	0.196712	0.187162	0.166395	0.177367	0.24737	0.231937	0.239802	0.233513	0.238907	0.241291	0.265449	0.254069	0.284952	0.293131	0.296415	0.305522		0.281183	0.299199	0.31239	0.301676	0.316046	0.29566	0.335296	0.332942	0.322691	0.32986	0.362419	0.359454	0.297231	0.302052	0.271555	0.270933	0.247394	0.25911	0.264017	0.252054	0.267498	0.277949	0.285362	0.281308
410	0.158118	0.158594	0.183828	0.191644	0.130892	0.126966	0.165895	0.163442	0.195737	0.186219	0.165728	0.176613	0.247524	0.232095	0.239954	0.233671	0.238891	0.240981	0.26495	0.253798	0.285126	0.292988	0.296188	0.305132		0.28132	0.299178	0.312031	0.301375	0.31586	0.295882	0.33546	0.33298	0.322214	0.329498	0.362124	0.359264	0.296854	0.302298	0.271299	0.270784	0.247298	0.259109	0.263963	0.251743	0.267174	0.277888	0.285496	0.281536
411	0.157413	0.157777	0.183114	0.190745	0.130054	0.12628	0.165238	0.162668	0.194777	0.185292	0.165068	0.175869	0.247663	0.232245	0.2401	0.233818	0.238869	0.240674	0.26446	0.253529	0.285287	0.292841	0.295959	0.304742		0.281446	0.299149	0.31167	0.301069	0.315674	0.296093	0.335621	0.333016	0.321746	0.329144	0.361838	0.359079	0.296479	0.302531	0.271045	0.270637	0.247194	0.259106	0.263902	0.251433	0.266851	0.27782	0.285618	0.281748
412	0.156719	0.156972	0.182408	0.189861	0.12923	0.125607	0.164589	0.161904	0.193834	0.18438	0.164415	0.175132	0.247788	0.232388	0.24024	0.233954	0.238842	0.24037	0.263979	0.25326	0.285435	0.292692	0.295727	0.304353		0.281561	0.299113	0.311308	0.300759	0.31549	0.296293	0.335779	0.333051	0.321288	0.328798	0.361561	0.358899	0.296107	0.302754	0.270793	0.270492	0.247084	0.259101	0.263835	0.251124	0.266528	0.277746	0.285727	0.281946
413	0.156036	0.156179	0.181708	0.188992	0.12842	0.124948	0.163947	0.16115	0.192908	0.183485	0.163768	0.174404	0.247901	0.232524	0.240374	0.234079	0.238811	0.240069	0.263506	0.252992	0.285571	0.292539	0.295492	0.303964		0.281666	0.29907	0.310943	0.300446	0.315308	0.296482	0.335934	0.333085	0.32084	0.328459	0.361294	0.358724	0.295736	0.302966	0.270543	0.270349	0.246968	0.259095	0.26376	0.250817	0.266206	0.277664	0.285825	0.282128
414	0.155364	0.155398	0.181016	0.188137	0.127624	0.124301	0.163313	0.160406	0.191997	0.182605	0.163128	0.173684	0.248	0.232652	0.240502	0.234194	0.238774	0.239773	0.263042	0.252724	0.285696	0.292385	0.295255	0.303577		0.28176	0.299022	0.310578	0.300129	0.315128	0.29666	0.336086	0.333117	0.3204	0.328127	0.361036	0.358554	0.295369	0.303166	0.270296	0.270208	0.246845	0.259088	0.26368	0.250511	0.265884	0.277576	0.285911	0.282297
415	0.154702	0.15463	0.180331	0.187298	0.126842	0.123667	0.162686	0.159673	0.191102	0.18174	0.162494	0.172972	0.248087	0.232775	0.240625	0.2343	0.238732	0.239481	0.262586	0.252457	0.285808	0.292228	0.295015	0.303191		0.281844	0.298968	0.310212	0.299808	0.314951	0.296828	0.336235	0.333149	0.31997	0.327802	0.360787	0.358388	0.295005	0.303356	0.27005	0.270069	0.246718	0.259081	0.263593	0.250207	0.265564	0.277481	0.285985	0.282451
416	0.15405	0.153872	0.179654	0.186473	0.126073	0.123046	0.162068	0.15895	0.190222	0.180891	0.161866	0.172268	0.248163	0.232891	0.240743	0.234396	0.238686	0.239193	0.262138	0.25219	0.285909	0.292069	0.294773	0.302807		0.281919	0.298909	0.309846	0.299485	0.314776	0.296985	0.33638	0.333179	0.319549	0.327484	0.360547	0.358227	0.294644	0.303536	0.269807	0.269932	0.246586	0.259073	0.2635	0.249903	0.265243	0.277379	0.286049	0.282592
417	0.153408	0.153126	0.178985	0.185662	0.125318	0.122437	0.161458	0.158238	0.189358	0.180057	0.161244	0.171572	0.248227	0.233002	0.240856	0.234483	0.238635	0.238909	0.261697	0.251923	0.285999	0.291909	0.294529	0.302425		0.281985	0.298846	0.309481	0.299159	0.314606	0.297133	0.336522	0.333209	0.319136	0.327172	0.360316	0.358071	0.294286	0.303706	0.269567	0.269797	0.24645	0.259065	0.263401	0.249601	0.264924	0.277271	0.286101	0.282719
418	0.152777	0.152391	0.178323	0.184866	0.124575	0.12184	0.160857	0.157536	0.18851	0.179238	0.160628	0.170885	0.248281	0.233107	0.240963	0.234562	0.238579	0.238631	0.261264	0.251656	0.286077	0.291746	0.294284	0.302045		0.282042	0.298778	0.309117	0.29883	0.314439	0.297272	0.33666	0.333238	0.318731	0.326867	0.360094	0.35792	0.293932	0.303865	0.269328	0.269664	0.246309	0.259058	0.263297	0.249299	0.264604	0.277156	0.286144	0.282834
419	0.152157	0.151667	0.177667	0.184086	0.123847	0.121258	0.160264	0.156845	0.187677	0.178434	0.160018	0.170205	0.248318	0.233204	0.241064	0.234628	0.238516	0.238357	0.26084	0.251389	0.286142	0.291581	0.294034	0.301666		0.282087	0.298704	0.30875	0.298495	0.314275	0.297397	0.336793	0.333265	0.318337	0.32657	0.359881	0.357773	0.293581	0.304011	0.269092	0.269533	0.246163	0.25905	0.263184	0.248997	0.264283	0.277032	0.286172	0.282931
420	0.151549	0.150956	0.177017	0.183324	0.123135	0.120693	0.159679	0.156165	0.186861	0.177647	0.159414	0.169535	0.248335	0.233289	0.241156	0.234679	0.238446	0.238085	0.260425	0.251119	0.28619	0.29141	0.293778	0.301286		0.282118	0.29862	0.308377	0.298151	0.314113	0.297505	0.336922	0.333288	0.317954	0.326283	0.359681	0.357633	0.293232	0.304142	0.268856	0.269404	0.246007	0.25904	0.26306	0.248692	0.263958	0.276895	0.286185	0.28301
421	0.150953	0.150257	0.176374	0.182578	0.122438	0.120143	0.159103	0.155496	0.186061	0.176875	0.158815	0.168873	0.248335	0.233363	0.24124	0.234715	0.238368	0.237816	0.260019	0.250848	0.286224	0.291235	0.293518	0.300905		0.282134	0.298527	0.307999	0.297801	0.313954	0.297599	0.337046	0.333308	0.317583	0.326005	0.359492	0.357498	0.292886	0.304258	0.26862	0.269276	0.245843	0.259028	0.262926	0.248387	0.26363	0.276746	0.286182	0.283071
422	0.150369	0.14957	0.175737	0.181847	0.121755	0.119607	0.158534	0.154838	0.185276	0.176119	0.158223	0.168219	0.248318	0.233429	0.241317	0.234739	0.238283	0.23755	0.259622	0.250576	0.286243	0.291057	0.293255	0.300524		0.282139	0.298428	0.307619	0.297446	0.313797	0.297679	0.337166	0.333326	0.317223	0.325735	0.359313	0.357368	0.292544	0.304362	0.268387	0.269151	0.245673	0.259016	0.262784	0.248082	0.263301	0.276589	0.286167	0.283116
423	0.149795	0.148894	0.175107	0.181132	0.121086	0.119085	0.157974	0.154189	0.184507	0.175378	0.157637	0.167574	0.248289	0.233488	0.241388	0.234753	0.238194	0.237289	0.259233	0.250305	0.28625	0.290876	0.292988	0.300145		0.282134	0.298322	0.307238	0.297086	0.313643	0.297749	0.337282	0.333343	0.316871	0.325473	0.359144	0.357242	0.292204	0.304454	0.268155	0.269028	0.245497	0.259003	0.262635	0.247777	0.262972	0.276424	0.286139	0.283146
424	0.149232	0.148231	0.174485	0.180432	0.120431	0.118575	0.157421	0.153551	0.183752	0.174651	0.157057	0.166936	0.248249	0.233542	0.241455	0.234758	0.2381	0.237032	0.258853	0.250034	0.286246	0.290693	0.29272	0.299768		0.282119	0.298212	0.306857	0.296724	0.313491	0.297809	0.337395	0.333359	0.316528	0.325217	0.358983	0.357122	0.291867	0.304537	0.267926	0.268907	0.245316	0.25899	0.262481	0.247474	0.262645	0.276253	0.286101	0.283163
425	0.148678	0.147578	0.173871	0.179745	0.119788	0.118076	0.156875	0.152922	0.183012	0.173938	0.156482	0.166305	0.2482	0.233591	0.241517	0.234757	0.238002	0.23678	0.258479	0.249765	0.286233	0.29051	0.292451	0.299394		0.282098	0.298098	0.306478	0.296361	0.313343	0.297861	0.337506	0.333375	0.316192	0.324967	0.358829	0.357006	0.291533	0.304611	0.2677	0.268788	0.245132	0.258976	0.262323	0.247174	0.26232	0.276079	0.286054	0.283168
426	0.148132	0.146937	0.173266	0.17907	0.119158	0.117586	0.156337	0.152301	0.182286	0.173239	0.155914	0.165681	0.248145	0.233639	0.241577	0.23475	0.237902	0.236533	0.258113	0.249498	0.286211	0.290327	0.292182	0.299023		0.28207	0.297982	0.306103	0.295998	0.313199	0.297907	0.337614	0.333392	0.315862	0.324721	0.358683	0.356894	0.291203	0.304678	0.267477	0.268671	0.244946	0.258963	0.262163	0.246877	0.261999	0.275902	0.285999	0.283163
427	0.147596	0.146308	0.172671	0.178408	0.11854	0.117105	0.155806	0.15169	0.181574	0.172554	0.155352	0.165065	0.248086	0.233685	0.241635	0.234741	0.2378	0.236293	0.257753	0.249233	0.286183	0.290144	0.291914	0.298657		0.282037	0.297864	0.305734	0.295637	0.313058	0.29795	0.33772	0.333411	0.315537	0.324479	0.358542	0.356786	0.290876	0.30474	0.267259	0.268556	0.244759	0.258951	0.262001	0.246584	0.261683	0.275725	0.285938	0.283149
428	0.147067	0.145689	0.172085	0.177757	0.117933	0.116631	0.155281	0.151087	0.180876	0.171881	0.154797	0.164455	0.248026	0.233733	0.241691	0.23473	0.237698	0.236059	0.257399	0.248971	0.286149	0.289963	0.291648	0.298295		0.282002	0.297746	0.305371	0.295279	0.31292	0.29799	0.337826	0.333432	0.315217	0.32424	0.358406	0.356681	0.290552	0.304798	0.267045	0.268443	0.244571	0.25894	0.26184	0.246297	0.261374	0.275549	0.285872	0.283128
429	0.146552	0.145082	0.171503	0.177125	0.117341	0.116177	0.154766	0.150493	0.180192	0.171222	0.154244	0.163851	0.247944	0.233772	0.24174	0.2347	0.237588	0.235827	0.257053	0.248708	0.286098	0.289775	0.291377	0.297931		0.281949	0.297618	0.305004	0.29491	0.312786	0.298012	0.337921	0.333447	0.314908	0.324015	0.358284	0.356581	0.290235	0.304842	0.266834	0.268335	0.244377	0.258933	0.261666	0.246004	0.261063	0.275361	0.285791	0.283086
430	0.146057	0.144487	0.170918	0.176517	0.116769	0.115752	0.154262	0.149908	0.179525	0.170577	0.153691	0.163255	0.247822	0.233793	0.241775	0.234637	0.237464	0.235591	0.256715	0.24844	0.28602	0.289574	0.291095	0.297558		0.281868	0.297472	0.30462	0.294519	0.312654	0.298002	0.338	0.333448	0.314616	0.323811	0.358182	0.356484	0.289929	0.304863	0.266624	0.268234	0.244168	0.258932	0.261467	0.245697	0.260741	0.275149	0.285687	0.283011
431	0.145579	0.143905	0.170335	0.175931	0.116214	0.115351	0.153768	0.149332	0.178874	0.169946	0.153141	0.162665	0.24767	0.2338	0.241798	0.234548	0.237329	0.235355	0.256387	0.248168	0.285921	0.289363	0.290805	0.29718		0.281765	0.297313	0.304225	0.29411	0.312525	0.297967	0.338066	0.33344	0.314339	0.323623	0.358098	0.356392	0.289629	0.304864	0.266414	0.268139	0.243948	0.258935	0.26125	0.245382	0.260413	0.274919	0.285564	0.28291
432	0.145115	0.143335	0.169756	0.175363	0.115675	0.114968	0.153283	0.148765	0.178238	0.169329	0.152595	0.162083	0.247496	0.233797	0.241813	0.234442	0.237185	0.23512	0.256066	0.247896	0.285804	0.289145	0.29051	0.296798		0.281644	0.297143	0.303825	0.293692	0.312398	0.297914	0.338125	0.333426	0.314073	0.323449	0.358026	0.356304	0.289336	0.304851	0.266207	0.268048	0.24372	0.258941	0.26102	0.245063	0.260082	0.274677	0.285426	0.282788
433	0.144661	0.142776	0.169184	0.174811	0.11515	0.114599	0.152806	0.148208	0.177617	0.168726	0.152054	0.161507	0.247308	0.233788	0.241822	0.234325	0.237037	0.234889	0.255753	0.247623	0.285676	0.288925	0.290212	0.296418		0.281513	0.296967	0.303423	0.293269	0.312273	0.29785	0.338178	0.333411	0.313816	0.323282	0.357964	0.356221	0.289046	0.304827	0.266002	0.26796	0.243486	0.258947	0.260782	0.244744	0.259752	0.274428	0.285276	0.28265
434	0.144216	0.14223	0.168621	0.17427	0.114638	0.114238	0.152335	0.14766	0.177009	0.168137	0.15152	0.160939	0.247115	0.233777	0.241828	0.234204	0.236886	0.234664	0.255448	0.247353	0.285539	0.288705	0.289915	0.296042		0.281377	0.29679	0.303026	0.292848	0.312151	0.297782	0.338231	0.333397	0.313565	0.323118	0.357908	0.356142	0.288759	0.304797	0.2658	0.267872	0.24325	0.258952	0.260544	0.24443	0.259426	0.274177	0.285119	0.282504
435	0.143777	0.141694	0.168071	0.173739	0.114136	0.113881	0.15187	0.14712	0.176414	0.167561	0.150994	0.160379	0.246927	0.233767	0.241835	0.234087	0.236737	0.234447	0.25515	0.247088	0.285401	0.28849	0.289621	0.295673		0.281242	0.296613	0.302637	0.292435	0.312033	0.297715	0.338288	0.33339	0.313318	0.322954	0.357854	0.356068	0.288471	0.304764	0.265602	0.267785	0.243015	0.258954	0.26031	0.244125	0.259108	0.273931	0.284958	0.282354
436	0.14334	0.14117	0.167536	0.173214	0.113642	0.113522	0.151408	0.14659	0.175832	0.166999	0.150478	0.159825	0.246751	0.233762	0.241845	0.233981	0.236591	0.23424	0.254859	0.246828	0.285263	0.288282	0.289332	0.295315		0.281114	0.296443	0.302263	0.292035	0.311917	0.297658	0.338352	0.333391	0.31307	0.322783	0.357799	0.355999	0.288181	0.304732	0.265409	0.267696	0.242782	0.25895	0.260087	0.243835	0.258802	0.273694	0.284797	0.282207
437	0.142903	0.140657	0.16702	0.172692	0.113156	0.113157	0.150949	0.146068	0.175261	0.166449	0.149974	0.15928	0.246596	0.233766	0.241861	0.233893	0.236452	0.234046	0.254575	0.246576	0.285133	0.288086	0.289053	0.294971		0.280999	0.296281	0.301909	0.291656	0.311805	0.297616	0.338427	0.333407	0.31282	0.322603	0.357738	0.355934	0.287888	0.304707	0.265221	0.267603	0.242556	0.258939	0.259879	0.243563	0.258511	0.273472	0.284641	0.282068
438	0.14248	0.140169	0.166513	0.172191	0.112693	0.112808	0.150492	0.145555	0.174709	0.165921	0.149483	0.158742	0.246416	0.233753	0.241865	0.233788	0.236309	0.233851	0.25431	0.246331	0.284983	0.287882	0.288769	0.294621		0.280862	0.2961	0.30154	0.291268	0.31168	0.297557	0.338509	0.333427	0.312588	0.322435	0.357692	0.35588	0.287588	0.304662	0.265034	0.267511	0.242311	0.258913	0.259663	0.243303	0.258227	0.273245	0.284463	0.281907
439	0.142085	0.139717	0.166007	0.171727	0.112267	0.1125	0.150038	0.14505	0.174184	0.165418	0.149005	0.158214	0.246169	0.233702	0.241841	0.233632	0.23615	0.233642	0.254076	0.246092	0.28479	0.287656	0.28847	0.294246		0.280674	0.295874	0.30113	0.290846	0.311531	0.29745	0.338589	0.333441	0.312391	0.322301	0.35768	0.35584	0.287283	0.304577	0.264843	0.267424	0.242027	0.258865	0.259414	0.243044	0.25794	0.272991	0.284241	0.281694
440	0.141713	0.139295	0.165504	0.171294	0.111871	0.112223	0.149588	0.144554	0.173681	0.164938	0.148539	0.157694	0.245872	0.233622	0.241797	0.233438	0.235979	0.233425	0.253865	0.245858	0.284564	0.287413	0.288158	0.293854		0.280447	0.295615	0.300689	0.290398	0.311364	0.297306	0.338669	0.333452	0.312221	0.322193	0.357693	0.355812	0.286974	0.304461	0.264651	0.26734	0.241713	0.258802	0.259141	0.242789	0.257653	0.272717	0.283985	0.281442
441	0.141358	0.138897	0.165006	0.170886	0.1115	0.111969	0.149141	0.144066	0.173198	0.164477	0.148082	0.157183	0.245539	0.233521	0.241738	0.233217	0.235799	0.233204	0.253674	0.245628	0.284312	0.287158	0.287839	0.293452		0.280192	0.295333	0.30023	0.289935	0.311187	0.297137	0.338748	0.333461	0.312071	0.322102	0.357724	0.355794	0.286663	0.304322	0.264458	0.267259	0.241378	0.258726	0.258851	0.242537	0.257367	0.27243	0.283703	0.281161
442	0.141015	0.138516	0.164516	0.170494	0.111146	0.11173	0.1487	0.143586	0.172731	0.164033	0.147634	0.156679	0.245187	0.233409	0.241671	0.232982	0.235615	0.232984	0.253495	0.245401	0.284046	0.286899	0.287517	0.293048		0.279922	0.295038	0.299764	0.289466	0.311005	0.296954	0.338827	0.333471	0.311934	0.322021	0.357768	0.355782	0.286351	0.304168	0.264267	0.267179	0.241031	0.258645	0.258553	0.24229	0.257083	0.272136	0.283405	0.280861
443	0.14068	0.138146	0.164036	0.170114	0.110805	0.111498	0.148264	0.143115	0.172277	0.163601	0.147194	0.156182	0.244832	0.233295	0.241601	0.232744	0.235428	0.23277	0.253324	0.245177	0.283772	0.286642	0.287195	0.292648		0.279648	0.294742	0.299302	0.289	0.310825	0.296767	0.338907	0.333482	0.311802	0.321942	0.357815	0.355775	0.28604	0.304009	0.264078	0.2671	0.240683	0.25856	0.258256	0.242049	0.256804	0.271841	0.283101	0.280553
444	0.140347	0.137781	0.163569	0.169739	0.110468	0.111265	0.147835	0.142653	0.171832	0.16318	0.146758	0.155692	0.24449	0.233188	0.241535	0.232517	0.235243	0.232567	0.253155	0.244954	0.283502	0.286392	0.286878	0.292261		0.279383	0.294455	0.298857	0.288546	0.310656	0.296589	0.338987	0.333498	0.311668	0.321857	0.357861	0.355769	0.285731	0.303852	0.263894	0.267021	0.240341	0.258479	0.257966	0.241814	0.256531	0.271553	0.282799	0.280248
445	0.140012	0.137414	0.163115	0.169362	0.11013	0.111023	0.147413	0.1422	0.171394	0.162766	0.146327	0.155207	0.244176	0.233096	0.24148	0.232312	0.235064	0.232378	0.252981	0.244732	0.283243	0.286156	0.286571	0.291894		0.279139	0.294188	0.29844	0.288115	0.310502	0.296431	0.339069	0.33352	0.311524	0.321757	0.357896	0.355763	0.285427	0.303708	0.263716	0.266941	0.240016	0.258404	0.257692	0.241588	0.256266	0.271276	0.282509	0.279957
446	0.139669	0.13704	0.162679	0.168976	0.109786	0.110764	0.146999	0.141756	0.170959	0.162355	0.145899	0.154729	0.243908	0.233029	0.24144	0.232141	0.234892	0.23221	0.252799	0.244511	0.283005	0.285939	0.286277	0.291553		0.278927	0.293952	0.298063	0.287715	0.310371	0.296303	0.339152	0.33355	0.311362	0.321636	0.357915	0.355753	0.285128	0.303583	0.263546	0.266858	0.239716	0.258341	0.257442	0.241371	0.256011	0.271019	0.282239	0.27969
447	0.139313	0.136652	0.162262	0.168575	0.109427	0.110479	0.146594	0.141321	0.170524	0.161945	0.145471	0.154256	0.243701	0.232996	0.241423	0.232017	0.234733	0.232067	0.252601	0.244289	0.282798	0.285749	0.286001	0.291247		0.27876	0.293757	0.297737	0.287356	0.31027	0.296216	0.339237	0.33359	0.311176	0.321484	0.357911	0.355737	0.284837	0.303487	0.263384	0.266772	0.239451	0.258295	0.257224	0.241163	0.255768	0.270786	0.282	0.279458
448	0.138953	0.136271	0.161882	0.168182	0.109076	0.110186	0.146207	0.140913	0.170108	0.161556	0.145057	0.153801	0.243543	0.23299	0.241423	0.231938	0.234587	0.231971	0.252412	0.244066	0.282603	0.285589	0.285736	0.290981		0.278625	0.293597	0.297461	0.287039	0.31021	0.296157	0.339343	0.333668	0.310996	0.321324	0.357913	0.355745	0.284547	0.303393	0.263235	0.266678	0.23921	0.258247	0.257038	0.240978	0.255536	0.270567	0.28177	0.279247
449	0.138603	0.135918	0.161548	0.167819	0.108754	0.109903	0.145843	0.140543	0.169727	0.161207	0.144667	0.153374	0.243408	0.232994	0.241429	0.231892	0.23445	0.23193	0.252255	0.243843	0.282399	0.285455	0.285473	0.290749		0.278503	0.293455	0.297221	0.286754	0.310188	0.296103	0.339484	0.333802	0.310849	0.321177	0.357951	0.3558	0.284253	0.303272	0.263099	0.266575	0.238973	0.258181	0.256874	0.240821	0.255315	0.270346	0.281523	0.279036
450	0.13826	0.135587	0.161251	0.167479	0.108455	0.109629	0.145496	0.140202	0.169374	0.160889	0.144295	0.152969	0.243291	0.233006	0.24144	0.23187	0.23432	0.231931	0.25212	0.243621	0.282188	0.285341	0.285212	0.290544		0.278389	0.293329	0.29701	0.286492	0.310197	0.296053	0.339648	0.333974	0.310726	0.321039	0.358013	0.355888	0.283957	0.303132	0.262972	0.266465	0.23874	0.258102	0.256725	0.240686	0.255102	0.270125	0.281265	0.278824
451	0.137923	0.13527	0.160977	0.167155	0.108172	0.109361	0.145163	0.139882	0.16904	0.160593	0.143936	0.152578	0.243186	0.233024	0.241455	0.231863	0.234192	0.231959	0.251999	0.243398	0.281972	0.285239	0.284954	0.290357		0.278282	0.293212	0.29682	0.286248	0.310225	0.296006	0.339826	0.33417	0.310617	0.320904	0.358089	0.355996	0.28366	0.302982	0.262851	0.266352	0.238512	0.258017	0.256587	0.240565	0.254895	0.269903	0.280999	0.278612
452	0.137591	0.134961	0.160718	0.16684	0.107897	0.109097	0.144837	0.139573	0.168718	0.16031	0.143584	0.152195	0.243088	0.233044	0.24147	0.231863	0.234065	0.231999	0.251884	0.243176	0.281754	0.285144	0.284698	0.290182		0.27818	0.293102	0.296641	0.286012	0.310262	0.295961	0.340006	0.334372	0.310511	0.320767	0.358168	0.35611	0.283364	0.302828	0.262734	0.266237	0.238287	0.25793	0.256454	0.240451	0.254691	0.269683	0.280729	0.278397
453	0.137262	0.134654	0.160461	0.166527	0.107625	0.108833	0.144514	0.139266	0.168401	0.160031	0.143233	0.151815	0.242991	0.233064	0.241484	0.23186	0.233934	0.232036	0.251767	0.242955	0.281536	0.285048	0.284444	0.290009		0.278079	0.292993	0.296468	0.285779	0.310299	0.295919	0.340177	0.334565	0.310397	0.320623	0.358238	0.356216	0.283072	0.302678	0.262618	0.266124	0.238065	0.257848	0.25632	0.240337	0.25449	0.269465	0.280461	0.27818
454	0.136936	0.134342	0.160196	0.16621	0.107349	0.108566	0.144188	0.138953	0.168081	0.159747	0.142878	0.15143	0.242889	0.233081	0.241496	0.231848	0.233796	0.232056	0.251639	0.242734	0.281321	0.284945	0.284193	0.289832		0.277977	0.292881	0.296291	0.28554	0.310325	0.295877	0.340329	0.334731	0.310267	0.320466	0.358289	0.356301	0.282784	0.30254	0.262499	0.266016	0.237846	0.257776	0.256181	0.240214	0.254289	0.269249	0.280198	0.277961
455	0.13661	0.134019	0.159912	0.16588	0.107062	0.108296	0.143855	0.138624	0.167751	0.159451	0.142515	0.151033	0.242778	0.233092	0.241504	0.231816	0.233648	0.232045	0.251491	0.242514	0.28111	0.284829	0.283945	0.289641		0.277871	0.292762	0.296103	0.285288	0.310331	0.295835	0.340452	0.334855	0.310109	0.320292	0.35831	0.35635	0.282503	0.302422	0.262375	0.265915	0.237629	0.257721	0.256031	0.240077	0.254085	0.269038	0.279944	0.277739
456	0.136283	0.133677	0.159597	0.165532	0.106758	0.108017	0.143509	0.138271	0.167403	0.159133	0.142136	0.15062	0.242652	0.233095	0.241506	0.231758	0.233486	0.231987	0.251315	0.242295	0.280906	0.284693	0.2837	0.28943		0.27776	0.292632	0.295896	0.285015	0.310306	0.295793	0.340534	0.33492	0.309914	0.320095	0.35829	0.35635	0.28223	0.302332	0.262242	0.265824	0.237414	0.257686	0.255865	0.239917	0.253878	0.268831	0.279705	0.277512
457	0.135969	0.133336	0.159289	0.165187	0.106458	0.107738	0.143169	0.137914	0.167065	0.158822	0.141757	0.150204	0.242547	0.233125	0.241525	0.231711	0.233331	0.231929	0.251138	0.24209	0.280725	0.284568	0.283482	0.289241		0.277669	0.292527	0.295723	0.284763	0.3103	0.295773	0.340603	0.334977	0.309711	0.319905	0.358269	0.356345	0.281981	0.302279	0.262128	0.265759	0.237224	0.257689	0.255716	0.239769	0.253701	0.268657	0.279492	0.277296
458	0.135675	0.133015	0.159024	0.16487	0.106184	0.107466	0.142853	0.137579	0.166762	0.158548	0.141393	0.149801	0.242495	0.233211	0.241581	0.231712	0.233201	0.231918	0.250987	0.241909	0.280573	0.284483	0.283308	0.289115		0.277621	0.292476	0.295626	0.284567	0.310358	0.295792	0.340691	0.335078	0.309533	0.319749	0.358285	0.356378	0.281765	0.302263	0.262056	0.265729	0.237076	0.257734	0.255614	0.239661	0.253583	0.268533	0.27931	0.277098
459	0.135398	0.132708	0.158792	0.164574	0.105929	0.107198	0.142557	0.13726	0.166488	0.158302	0.141039	0.14941	0.242483	0.233338	0.241663	0.231748	0.233088	0.231942	0.250856	0.241745	0.280442	0.284429	0.283167	0.289034		0.277604	0.292466	0.295589	0.284413	0.310463	0.295841	0.340791	0.33521	0.30937	0.319615	0.358328	0.356438	0.281574	0.302275	0.262016	0.265724	0.23696	0.257811	0.255546	0.239584	0.253507	0.268447	0.279151	0.276913
460	0.135132	0.132413	0.158583	0.164292	0.105688	0.106934	0.142273	0.136953	0.166233	0.158075	0.140694	0.149027	0.242497	0.233491	0.241762	0.231806	0.232985	0.231988	0.250735	0.241593	0.280325	0.284393	0.283047	0.288984		0.277608	0.292481	0.295591	0.284286	0.310599	0.295908	0.340895	0.335359	0.309215	0.319494	0.358384	0.356513	0.281399	0.302305	0.261995	0.265735	0.236865	0.257908	0.255501	0.239527	0.253459	0.268385	0.279007	0.276736
461	0.134873	0.132124	0.158387	0.164018	0.105455	0.106672	0.141998	0.136653	0.16599	0.157861	0.140353	0.148647	0.242523	0.233657	0.241866	0.231873	0.232885	0.232043	0.250619	0.241445	0.280213	0.284366	0.282938	0.288949		0.27762	0.292508	0.295613	0.284172	0.310748	0.295983	0.340996	0.335512	0.30906	0.319374	0.358442	0.356591	0.281233	0.302343	0.261983	0.265754	0.236782	0.258017	0.255466	0.239478	0.253426	0.268336	0.278868	0.27656
462	0.134616	0.131837	0.158192	0.163746	0.105225	0.106411	0.141724	0.136355	0.165752	0.15765	0.140013	0.148269	0.242549	0.23382	0.241967	0.231937	0.232781	0.232096	0.250499	0.241296	0.280099	0.284336	0.282827	0.288913		0.277631	0.292532	0.295636	0.284057	0.310893	0.296057	0.341088	0.335655	0.308897	0.319246	0.358491	0.35666	0.281066	0.302382	0.261969	0.26577	0.236699	0.258126	0.255429	0.239426	0.253391	0.268285	0.278727	0.276379
463	0.134357	0.131548	0.15799	0.163469	0.10499	0.106149	0.141446	0.136055	0.16551	0.157434	0.139671	0.147889	0.24256	0.233966	0.242054	0.231984	0.232666	0.232134	0.250367	0.24114	0.279973	0.284293	0.282704	0.288862		0.277628	0.292538	0.295642	0.283926	0.311018	0.296118	0.341164	0.335774	0.308718	0.319098	0.358518	0.356708	0.280892	0.30241	0.261943	0.265775	0.236608	0.258226	0.255377	0.239361	0.25334	0.26822	0.278575	0.276189
464	0.134089	0.131252	0.157769	0.163181	0.104746	0.105885	0.14116	0.135748	0.165257	0.157205	0.139323	0.147504	0.242543	0.23408	0.242117	0.232002	0.232532	0.232143	0.250216	0.240969	0.279829	0.284227	0.282558	0.288778		0.277602	0.292513	0.29561	0.283764	0.311104	0.296156	0.341216	0.335857	0.308514	0.318921	0.358512	0.356723	0.280701	0.302419	0.261892	0.265761	0.236496	0.258306	0.255299	0.239272	0.253259	0.268129	0.278403	0.275983
465	0.133808	0.130945	0.15752	0.162876	0.104486	0.105617	0.140858	0.135429	0.164985	0.156956	0.138967	0.14711	0.242484	0.234147	0.242145	0.231978	0.232374	0.232113	0.250039	0.240779	0.279657	0.284126	0.282377	0.288648		0.27754	0.292441	0.295522	0.283557	0.311136	0.296161	0.341237	0.335889	0.308278	0.318703	0.35846	0.356693	0.280485	0.302399	0.261807	0.265717	0.236355	0.258356	0.255182	0.239147	0.253133	0.267998	0.278204	0.275755
466	0.13351	0.130621	0.157233	0.162548	0.104205	0.105344	0.140536	0.135095	0.164686	0.156677	0.138597	0.146704	0.242371	0.234154	0.24213	0.231898	0.232183	0.232029	0.249827	0.240562	0.279449	0.283981	0.282149	0.288455		0.277432	0.292309	0.295359	0.283291	0.311097	0.296122	0.341222	0.335857	0.308002	0.318435	0.358351	0.356606	0.280236	0.302342	0.261676	0.265635	0.236173	0.258365	0.255013	0.238975	0.252947	0.267814	0.277968	0.275499
467	0.133212	0.130295	0.156927	0.16221	0.103913	0.105069	0.140208	0.134755	0.16438	0.15639	0.138224	0.146293	0.242241	0.234142	0.242109	0.231792	0.231982	0.231923	0.2496	0.240351	0.279237	0.283821	0.281918	0.288241		0.277317	0.292167	0.295184	0.283013	0.311034	0.296094	0.3412	0.335799	0.307712	0.318141	0.358216	0.356493	0.279992	0.302291	0.261545	0.265553	0.235983	0.258383	0.254826	0.238791	0.252755	0.267623	0.277731	0.27524
468	0.132931	0.129981	0.156629	0.161882	0.103624	0.104797	0.139888	0.134421	0.16409	0.156117	0.137856	0.145885	0.242138	0.234158	0.242121	0.231694	0.231796	0.231827	0.249377	0.240173	0.279049	0.283681	0.281724	0.288051		0.277232	0.292063	0.295061	0.282773	0.311	0.296123	0.341202	0.335756	0.307434	0.317848	0.358088	0.356389	0.279787	0.302289	0.261457	0.265506	0.235819	0.258452	0.254657	0.23863	0.252607	0.267473	0.277524	0.274998
469	0.132662	0.129675	0.156337	0.161559	0.103336	0.104527	0.139574	0.134092	0.163812	0.155855	0.137491	0.145478	0.242051	0.23419	0.242154	0.231598	0.231619	0.231738	0.249156	0.240018	0.278876	0.283551	0.281553	0.287876		0.277166	0.291984	0.294972	0.282558	0.310983	0.296191	0.341217	0.335718	0.307161	0.317554	0.357961	0.356288	0.279609	0.302318	0.261398	0.265483	0.23567	0.258555	0.254498	0.238482	0.252488	0.267349	0.277337	0.274768
470	0.1324	0.129374	0.156046	0.16124	0.10305	0.104259	0.139263	0.133766	0.16354	0.155599	0.137129	0.145072	0.24197	0.234228	0.242196	0.2315	0.231444	0.231648	0.248933	0.239875	0.278708	0.283425	0.281394	0.287707		0.277108	0.291916	0.294901	0.282353	0.310971	0.296277	0.341235	0.335677	0.306886	0.317253	0.357828	0.356181	0.279444	0.302364	0.261352	0.26547	0.23553	0.258677	0.254342	0.23834	0.252384	0.267237	0.277159	0.27454
471	0.132139	0.129076	0.155755	0.160921	0.102765	0.103991	0.138953	0.133441	0.163269	0.155343	0.136767	0.144668	0.241887	0.234262	0.242235	0.231396	0.231265	0.231553	0.248704	0.239732	0.278537	0.283295	0.281233	0.287534		0.277047	0.291844	0.29483	0.282145	0.310952	0.296364	0.341244	0.335624	0.306601	0.316941	0.357685	0.356064	0.279281	0.302411	0.261306	0.265456	0.235387	0.2588	0.254182	0.238193	0.252279	0.267124	0.27698	0.274308
472	0.131875	0.128777	0.15546	0.1606	0.10248	0.103722	0.138641	0.133114	0.162996	0.155083	0.136405	0.144264	0.241791	0.234282	0.24226	0.23128	0.231076	0.231448	0.248466	0.239578	0.278354	0.283153	0.281058	0.287347		0.276972	0.291755	0.29474	0.281922	0.310913	0.296433	0.341234	0.33555	0.3063	0.316614	0.357523	0.355929	0.279108	0.302442	0.261244	0.265427	0.235235	0.258908	0.254008	0.238034	0.252156	0.266995	0.276788	0.274065
473	0.131603	0.128474	0.155159	0.160273	0.102193	0.103453	0.138325	0.132784	0.162715	0.154815	0.13604	0.14386	0.241673	0.234276	0.242258	0.231148	0.23087	0.231327	0.248216	0.239403	0.278148	0.282992	0.280855	0.287138		0.276871	0.291635	0.294616	0.28167	0.310844	0.296463	0.341195	0.335447	0.305976	0.316267	0.357338	0.355769	0.27891	0.302442	0.261151	0.265372	0.235064	0.258984	0.253814	0.237854	0.252002	0.266838	0.276572	0.273803
474	0.131316	0.128164	0.154848	0.159939	0.101906	0.103182	0.138001	0.132448	0.162422	0.154534	0.135671	0.143455	0.241524	0.234236	0.242218	0.230996	0.230641	0.231183	0.24795	0.239195	0.277911	0.282805	0.280613	0.286895		0.276734	0.291468	0.294439	0.281375	0.310732	0.296437	0.341116	0.335305	0.305621	0.315897	0.357122	0.355579	0.278676	0.302395	0.261014	0.265277	0.234865	0.25901	0.253592	0.237643	0.2518	0.266638	0.276322	0.273514
475	0.131011	0.127843	0.154525	0.159595	0.101615	0.102909	0.137667	0.132106	0.162112	0.154235	0.135297	0.14305	0.241333	0.234149	0.242128	0.230817	0.230383	0.231013	0.247664	0.238943	0.277633	0.282582	0.280318	0.286611		0.276548	0.291242	0.294191	0.281025	0.310565	0.296335	0.340987	0.335116	0.305228	0.315498	0.356871	0.355351	0.278394	0.302285	0.260818	0.265131	0.23463	0.258972	0.253334	0.237393	0.251535	0.266381	0.276026	0.273192
476	0.130696	0.127518	0.154194	0.159243	0.101324	0.102633	0.137327	0.131759	0.161793	0.153926	0.134918	0.142646	0.241119	0.234029	0.242004	0.230614	0.230099	0.230821	0.247362	0.238666	0.277332	0.282341	0.279992	0.286306		0.276333	0.290976	0.293894	0.28064	0.310357	0.296188	0.340835	0.334894	0.30482	0.315081	0.356599	0.355104	0.278086	0.302145	0.260578	0.264959	0.234372	0.258899	0.253053	0.237122	0.251224	0.266087	0.275711	0.272853
477	0.130386	0.127194	0.153861	0.158889	0.101034	0.102357	0.136987	0.131413	0.161477	0.15362	0.134534	0.142246	0.240906	0.233894	0.241869	0.230393	0.229797	0.230616	0.247051	0.23839	0.277031	0.282101	0.279663	0.286004		0.276112	0.290699	0.293581	0.280247	0.310129	0.29604	0.34069	0.334659	0.304421	0.31466	0.356323	0.354855	0.277784	0.302014	0.260321	0.264791	0.234111	0.25883	0.252769	0.236851	0.250896	0.265784	0.275404	0.272517
478	0.130077	0.126871	0.153524	0.158533	0.100744	0.10208	0.136647	0.131066	0.161162	0.153314	0.134148	0.141849	0.24069	0.233745	0.241723	0.230157	0.229479	0.230398	0.246731	0.238112	0.276727	0.281857	0.279329	0.285701		0.275884	0.290411	0.293251	0.279847	0.309884	0.295887	0.340547	0.334407	0.304023	0.314231	0.356042	0.354602	0.277483	0.301887	0.26005	0.264624	0.233845	0.258761	0.252478	0.236578	0.250553	0.265471	0.275102	0.272182
479	0.129769	0.126547	0.153185	0.158174	0.100454	0.101802	0.136305	0.130718	0.160847	0.153008	0.133759	0.141454	0.24047	0.233583	0.241566	0.229907	0.229148	0.230169	0.246403	0.23783	0.276417	0.281608	0.278989	0.285394		0.275649	0.290111	0.292907	0.279438	0.309622	0.295726	0.340399	0.334139	0.303622	0.313792	0.35575	0.35434	0.27718	0.301758	0.259765	0.264453	0.233572	0.258689	0.252179	0.236299	0.250194	0.265148	0.274799	0.271843
480	0.12946	0.126222	0.152843	0.157813	0.100164	0.101524	0.135963	0.13037	0.160531	0.1527	0.133369	0.14106	0.240241	0.233408	0.241397	0.229645	0.228806	0.22993	0.246067	0.237542	0.276098	0.281352	0.278639	0.28508		0.275404	0.289797	0.292549	0.279018	0.309345	0.295555	0.340238	0.333852	0.30321	0.313341	0.355445	0.354064	0.276872	0.301622	0.259468	0.264273	0.233293	0.25861	0.251871	0.236012	0.249823	0.264813	0.27449	0.271497
481	0.129149	0.125896	0.152498	0.15745	0.0998732	0.101246	0.135619	0.130022	0.160212	0.152388	0.132979	0.140667	0.240001	0.233221	0.241217	0.229374	0.228456	0.229682	0.245722	0.237246	0.27577	0.281085	0.278279	0.284755		0.275147	0.289471	0.292178	0.278587	0.309054	0.295369	0.34006	0.333546	0.302784	0.312875	0.355123	0.353771	0.276555	0.301474	0.25916	0.264083	0.233005	0.258519	0.251552	0.235715	0.249439	0.264466	0.27417	0.271142
482	0.128834	0.125567	0.15215	0.157084	0.0995814	0.100967	0.135272	0.129672	0.15989	0.152072	0.132589	0.140274	0.239747	0.233022	0.241025	0.229096	0.2281	0.229425	0.245371	0.23694	0.275428	0.280804	0.277905	0.284415		0.274879	0.28913	0.291795	0.278144	0.308749	0.295168	0.339858	0.333219	0.302336	0.312391	0.35478	0.353455	0.276225	0.301307	0.258842	0.263876	0.232708	0.258412	0.25122	0.235404	0.249044	0.264106	0.273834	0.270772
483	0.128513	0.125235	0.151797	0.156716	0.0992882	0.100689	0.134923	0.129321	0.159563	0.15175	0.1322	0.139879	0.239477	0.232813	0.24082	0.228812	0.227741	0.229161	0.245013	0.236621	0.27507	0.280508	0.277516	0.284057		0.274597	0.288774	0.291402	0.277687	0.308432	0.294946	0.339624	0.33287	0.30186	0.311887	0.354412	0.353113	0.27588	0.301117	0.258516	0.26365	0.2324	0.258285	0.250872	0.235078	0.248639	0.263732	0.273477	0.270385
484	0.128185	0.124898	0.151442	0.156344	0.0989933	0.100412	0.134571	0.128968	0.159231	0.151421	0.131814	0.139483	0.239189	0.232593	0.240603	0.228524	0.22738	0.228891	0.244648	0.236286	0.274695	0.280194	0.277109	0.283677		0.274299	0.288403	0.290999	0.277216	0.308104	0.294702	0.339353	0.332498	0.301352	0.311361	0.354017	0.35274	0.275515	0.300898	0.258183	0.263399	0.23208	0.258135	0.250509	0.234732	0.248225	0.263344	0.273093	0.269978
485	0.127848	0.124556	0.151082	0.15597	0.0986962	0.100135	0.134216	0.128614	0.158891	0.151084	0.131431	0.139084	0.238878	0.232364	0.240374	0.228236	0.227022	0.228615	0.244277	0.235935	0.274298	0.279858	0.276682	0.283272		0.273986	0.288015	0.290587	0.276729	0.307767	0.294433	0.339039	0.3321	0.300804	0.310809	0.353591	0.352333	0.275127	0.300645	0.257845	0.263121	0.231747	0.257958	0.250127	0.234365	0.247805	0.26294	0.272678	0.269547
486	0.127506	0.124215	0.150719	0.155601	0.0984009	0.0998633	0.133858	0.128261	0.158553	0.150749	0.131058	0.13869	0.23854	0.232115	0.240123	0.227937	0.226653	0.228325	0.243897	0.235562	0.273884	0.279507	0.276232	0.282843		0.273652	0.287603	0.290154	0.276217	0.307412	0.294132	0.338703	0.331685	0.300244	0.310256	0.353154	0.351918	0.274716	0.30037	0.25749	0.262823	0.231403	0.257762	0.249728	0.233975	0.247356	0.262514	0.272234	0.269096
487	0.127163	0.123879	0.150352	0.155241	0.0981103	0.0995991	0.133499	0.127912	0.158223	0.150425	0.1307	0.138305	0.238175	0.231836	0.239847	0.227619	0.226262	0.228013	0.243507	0.235168	0.273454	0.279147	0.275759	0.282397		0.273299	0.287162	0.289689	0.275674	0.307034	0.293799	0.338367	0.331258	0.299694	0.309719	0.352725	0.35152	0.274287	0.300088	0.257107	0.262512	0.231052	0.25756	0.249314	0.233564	0.246863	0.26206	0.271769	0.268631
488	0.126818	0.123546	0.149981	0.154887	0.0978225	0.09934	0.133139	0.127565	0.157898	0.150108	0.13035	0.137926	0.237788	0.231533	0.239548	0.227285	0.225855	0.227683	0.243107	0.234756	0.273012	0.278777	0.275266	0.281934		0.272929	0.286696	0.289197	0.275107	0.306635	0.29344	0.338024	0.330816	0.299145	0.309187	0.352295	0.351126	0.273841	0.299796	0.256702	0.26219	0.230693	0.257349	0.248886	0.233133	0.246336	0.261583	0.271284	0.268154
489	0.12647	0.123213	0.149607	0.154535	0.0975358	0.0990835	0.132777	0.127219	0.157575	0.149793	0.130006	0.13755	0.237381	0.231211	0.239231	0.226937	0.225434	0.227339	0.242698	0.234331	0.272556	0.278397	0.274757	0.281456		0.272544	0.28621	0.288685	0.274519	0.306217	0.293058	0.337669	0.330357	0.29859	0.30865	0.351855	0.350726	0.27338	0.299493	0.256279	0.261855	0.230326	0.257126	0.248444	0.232687	0.245784	0.261087	0.270783	0.267663
490	0.126119	0.122878	0.149229	0.154182	0.0972483	0.0988273	0.132413	0.126874	0.157251	0.149477	0.129663	0.137174	0.236961	0.230874	0.2389	0.226579	0.225003	0.226983	0.24228	0.233894	0.272089	0.278005	0.274234	0.280964		0.272147	0.285708	0.288157	0.273917	0.305784	0.29266	0.337293	0.329877	0.298018	0.308099	0.351398	0.350309	0.272908	0.299176	0.255843	0.261506	0.22995	0.256891	0.24799	0.232227	0.245216	0.260577	0.270267	0.267161
491	0.125764	0.122538	0.148847	0.153822	0.0969581	0.0985688	0.132047	0.126526	0.156923	0.149155	0.129316	0.136796	0.236531	0.230528	0.23856	0.226214	0.224567	0.226619	0.241856	0.23345	0.271611	0.277601	0.273702	0.280461		0.271741	0.285194	0.287619	0.273306	0.305338	0.292249	0.336892	0.329374	0.297421	0.307524	0.350913	0.349863	0.272427	0.298843	0.255398	0.261145	0.229565	0.256639	0.247525	0.231757	0.244643	0.260057	0.269739	0.266647
492	0.125405	0.122192	0.14846	0.153453	0.0966634	0.0983056	0.131679	0.126176	0.156587	0.148822	0.12896	0.13641	0.236095	0.230176	0.238215	0.225843	0.224129	0.22625	0.241425	0.233002	0.271123	0.277183	0.273163	0.279948		0.271327	0.284674	0.287077	0.272691	0.304881	0.291831	0.336457	0.328845	0.29679	0.306914	0.350393	0.349377	0.271937	0.298493	0.254948	0.260769	0.229171	0.25637	0.247049	0.231279	0.244072	0.259531	0.269202	0.266121
493	0.12504	0.121836	0.148069	0.153071	0.0963625	0.0980352	0.131308	0.125822	0.15624	0.148475	0.128592	0.136016	0.235658	0.229824	0.237868	0.22547	0.223694	0.225881	0.240988	0.232553	0.270625	0.276751	0.272621	0.279427		0.270909	0.28415	0.286535	0.272077	0.304417	0.291411	0.335983	0.328288	0.296118	0.30626	0.34983	0.34884	0.271443	0.298123	0.254498	0.260378	0.228768	0.256082	0.246564	0.230795	0.243514	0.259004	0.268658	0.265585
494	0.12467	0.121469	0.147673	0.15267	0.0960534	0.0977551	0.130934	0.125463	0.155879	0.14811	0.128207	0.135609	0.235224	0.229477	0.237525	0.225098	0.223265	0.225513	0.240546	0.232108	0.270119	0.276304	0.27208	0.278898		0.270489	0.283629	0.286001	0.27147	0.303947	0.290994	0.335464	0.3277	0.295394	0.305553	0.349215	0.348242	0.270946	0.29773	0.254053	0.259973	0.228355	0.255771	0.24607	0.23031	0.242979	0.258479	0.268109	0.265039
495	0.124305	0.121107	0.147282	0.152272	0.0957529	0.0974843	0.130564	0.125108	0.155515	0.147731	0.127823	0.135206	0.234781	0.229127	0.237173	0.224725	0.222838	0.225147	0.240101	0.231657	0.269602	0.275843	0.271533	0.278354		0.270063	0.283091	0.285456	0.270847	0.303461	0.290558	0.33492	0.327102	0.294649	0.304824	0.348574	0.347613	0.27044	0.297313	0.253604	0.259548	0.227936	0.255436	0.24556	0.229813	0.242448	0.257947	0.267549	0.264485
496	0.123951	0.120764	0.146901	0.151893	0.0954744	0.0972384	0.130202	0.124764	0.155157	0.147347	0.127455	0.134822	0.234318	0.228764	0.236799	0.224347	0.222407	0.224781	0.239652	0.231191	0.26907	0.275372	0.270974	0.277788		0.269626	0.282522	0.284886	0.27019	0.302945	0.290083	0.334375	0.326509	0.293911	0.304106	0.347937	0.346983	0.269919	0.29687	0.253139	0.259102	0.227514	0.255077	0.245028	0.229293	0.2419	0.257398	0.266972	0.263925
497	0.123604	0.120433	0.146527	0.151527	0.0952113	0.09701	0.129844	0.124427	0.154803	0.146957	0.1271	0.13445	0.233836	0.228388	0.236407	0.223963	0.221971	0.224411	0.239198	0.230712	0.268523	0.274889	0.270402	0.277202		0.269176	0.281924	0.284293	0.269503	0.302405	0.289574	0.333822	0.325914	0.293172	0.303391	0.347295	0.346346	0.269384	0.296404	0.25266	0.258635	0.227088	0.254697	0.244477	0.228754	0.241338	0.256832	0.266377	0.263358
498	0.123261	0.120108	0.146156	0.151166	0.0949568	0.0967915	0.129488	0.124095	0.154449	0.146563	0.12675	0.134085	0.233339	0.228	0.235998	0.223571	0.22153	0.224036	0.238739	0.230221	0.267963	0.274394	0.269818	0.276599		0.268714	0.281305	0.283681	0.268794	0.301843	0.289039	0.333254	0.32531	0.292424	0.30267	0.346642	0.345696	0.268836	0.295917	0.252169	0.258149	0.226656	0.254297	0.24391	0.228199	0.240762	0.256251	0.265767	0.26278
499	0.122915	0.119784	0.145783	0.150805	0.0947042	0.0965755	0.129132	0.123763	0.154092	0.146163	0.126401	0.133721	0.232829	0.2276	0.235575	0.223171	0.221082	0.223654	0.238272	0.229719	0.26739	0.273885	0.269221	0.275979		0.268239	0.280668	0.283054	0.268067	0.301264	0.288485	0.332666	0.324689	0.291658	0.301932	0.34597	0.345025	0.268276	0.295411	0.251665	0.257647	0.226214	0.25388	0.243329	0.22763	0.240175	0.255657	0.265143	0.26219
500	0.122563	0.119455	0.145403	0.150437	0.0944468	0.0963545	0.128773	0.123428	0.15373	0.145757	0.126046	0.133352	0.232308	0.227189	0.235142	0.222761	0.220627	0.223261	0.237796	0.229208	0.266804	0.273364	0.268612	0.275347		0.267752	0.280019	0.282416	0.26733	0.30067	0.287917	0.332051	0.324044	0.290867	0.301171	0.345271	0.344327	0.267706	0.294887	0.251151	0.257131	0.225763	0.253447	0.242736	0.22705	0.239579	0.255052	0.264505	0.261586
501	0.122201	0.119115	0.145014	0.150055	0.0941779	0.0961211	0.128407	0.123087	0.153359	0.145346	0.12568	0.132972	0.23178	0.226766	0.234699	0.222341	0.220164	0.222857	0.23731	0.22869	0.266206	0.272827	0.26799	0.274703		0.267251	0.279362	0.28177	0.266589	0.300066	0.287342	0.331402	0.323365	0.290042	0.300376	0.344539	0.343594	0.267126	0.294349	0.250628	0.256601	0.225299	0.253001	0.242135	0.226462	0.238976	0.254436	0.263854	0.260967
502	0.121824	0.118758	0.144611	0.149652	0.0938907	0.0958679	0.128032	0.122734	0.152976	0.144929	0.125299	0.132575	0.231246	0.226333	0.234251	0.221908	0.219691	0.222439	0.236812	0.228166	0.265597	0.272276	0.267356	0.27405		0.266736	0.278704	0.281121	0.265849	0.299455	0.286768	0.330714	0.322647	0.289176	0.299539	0.343767	0.34282	0.266539	0.293798	0.250097	0.256059	0.224821	0.252543	0.241528	0.225869	0.238369	0.253813	0.263193	0.260331
503	0.121426	0.118377	0.14419	0.149223	0.0935785	0.0955873	0.127646	0.122368	0.152579	0.144506	0.124895	0.132155	0.23071	0.225888	0.233799	0.221463	0.219209	0.222004	0.236302	0.227636	0.264976	0.271709	0.266709	0.27339		0.266208	0.278049	0.280472	0.265117	0.298841	0.2862	0.329981	0.321882	0.28826	0.298651	0.342946	0.341999	0.265945	0.293236	0.249559	0.255508	0.224327	0.252075	0.240917	0.225274	0.237759	0.253183	0.262521	0.259674
504	0.121005	0.117968	0.143747	0.148759	0.0932347	0.0952719	0.127246	0.121984	0.152163	0.144077	0.124463	0.131707	0.230173	0.225434	0.233347	0.221003	0.218717	0.221551	0.235777	0.227103	0.264345	0.271126	0.26605	0.272725		0.265666	0.277402	0.279826	0.264399	0.298228	0.285645	0.329195	0.321062	0.287287	0.297705	0.342071	0.341123	0.265345	0.292665	0.249015	0.254949	0.223814	0.2516	0.240305	0.224679	0.237148	0.252549	0.261839	0.258996
505	0.120577	0.117554	0.143303	0.148286	0.092887	0.0949488	0.126848	0.121603	0.151747	0.14365	0.124029	0.131257	0.229642	0.22498	0.232897	0.220541	0.218231	0.221095	0.23525	0.226574	0.263705	0.270536	0.26538	0.272057		0.265111	0.276757	0.279189	0.263691	0.297616	0.285097	0.328375	0.320212	0.286273	0.296723	0.341164	0.340211	0.264745	0.292074	0.248473	0.254374	0.223288	0.251114	0.239692	0.224083	0.236544	0.251912	0.261155	0.258303
506	0.120159	0.117157	0.14288	0.147826	0.092562	0.0946447	0.126468	0.12124	0.151348	0.143232	0.123613	0.130829	0.229116	0.224537	0.232451	0.220088	0.217764	0.220648	0.234727	0.226051	0.263056	0.269946	0.264703	0.271381		0.264544	0.276103	0.278559	0.262983	0.297002	0.284542	0.327538	0.319357	0.285241	0.295735	0.340248	0.339281	0.264145	0.291454	0.247937	0.253774	0.222752	0.250613	0.239073	0.223482	0.235951	0.251272	0.260469	0.257601
507	0.119746	0.116769	0.142468	0.147372	0.0922506	0.0943518	0.126099	0.12089	0.150958	0.142818	0.123208	0.130415	0.228592	0.224097	0.232005	0.219637	0.217308	0.220206	0.234206	0.22553	0.262397	0.269352	0.264017	0.270697		0.263967	0.275439	0.27793	0.262272	0.296382	0.283979	0.326683	0.318492	0.284187	0.294735	0.339317	0.338332	0.263543	0.290809	0.247403	0.253154	0.222207	0.250097	0.238447	0.222874	0.235362	0.250627	0.259779	0.256888
508	0.119333	0.116384	0.142059	0.146917	0.0919438	0.0940622	0.125735	0.120544	0.150569	0.142403	0.122806	0.130006	0.228064	0.223654	0.231554	0.219183	0.216856	0.219761	0.233682	0.225008	0.261727	0.26875	0.26332	0.270004		0.263377	0.274766	0.277298	0.261556	0.295754	0.283407	0.325805	0.317609	0.28311	0.293717	0.338367	0.33736	0.262935	0.290144	0.246864	0.252516	0.221651	0.249566	0.237812	0.222258	0.234773	0.249975	0.259081	0.256164
509	0.118913	0.115994	0.141646	0.146456	0.0916327	0.0937681	0.125367	0.120195	0.150176	0.141983	0.1224	0.129594	0.227528	0.223203	0.231094	0.218723	0.216399	0.21931	0.233149	0.224478	0.261046	0.268135	0.262611	0.269299		0.262776	0.274083	0.276658	0.260835	0.295115	0.282825	0.324902	0.316705	0.282009	0.292677	0.337394	0.336362	0.262319	0.289462	0.246318	0.251865	0.221085	0.249022	0.237168	0.221633	0.234177	0.249313	0.258371	0.255426
510	0.118482	0.115591	0.141221	0.14598	0.0913083	0.0934616	0.124991	0.119836	0.149771	0.141553	0.121982	0.129169	0.226979	0.222737	0.230623	0.218249	0.215929	0.218845	0.232604	0.223938	0.260351	0.267504	0.26189	0.268582		0.262163	0.27339	0.276005	0.260105	0.294461	0.282233	0.323971	0.315772	0.280883	0.291608	0.336392	0.335337	0.261691	0.288768	0.245759	0.251203	0.220508	0.248463	0.236512	0.220997	0.23357	0.248639	0.257646	0.254675
511	0.118034	0.115168	0.140775	0.145483	0.0909616	0.0931349	0.124598	0.11946	0.149346	0.14111	0.121543	0.128723	0.226414	0.222251	0.230136	0.217758	0.215438	0.21836	0.232041	0.223382	0.259643	0.266853	0.261154	0.26785		0.261537	0.272685	0.275334	0.259364	0.293789	0.281628	0.32301	0.314806	0.279729	0.290507	0.335357	0.33428	0.261048	0.288067	0.245183	0.250534	0.21992	0.247889	0.235842	0.220349	0.232945	0.247949	0.256902	0.253908
512	0.117564	0.114717	0.140299	0.144959	0.0905836	0.0927801	0.124183	0.119059	0.148896	0.140647	0.121078	0.128248	0.225827	0.221739	0.229629	0.217244	0.214919	0.217851	0.231457	0.222807	0.258921	0.266177	0.260404	0.267102		0.260899	0.271969	0.274641	0.258611	0.293096	0.28101	0.322014	0.313799	0.278546	0.289369	0.334284	0.333189	0.260386	0.287364	0.244585	0.249861	0.21932	0.247302	0.235158	0.219687	0.232296	0.247242	0.256136	0.253124
513	0.117067	0.114232	0.139787	0.144399	0.0901653	0.0923893	0.123738	0.118627	0.148413	0.140162	0.120577	0.127735	0.225215	0.221194	0.229099	0.216702	0.214364	0.217311	0.230846	0.222208	0.258183	0.265472	0.259637	0.266337		0.260248	0.271241	0.27392	0.257844	0.292378	0.280378	0.320983	0.312748	0.277332	0.288187	0.333168	0.332061	0.259703	0.286662	0.24396	0.249188	0.218708	0.246702	0.234457	0.219011	0.23162	0.246515	0.255345	0.252323
514	0.116563	0.113726	0.139261	0.143822	0.0897268	0.0919824	0.123284	0.118183	0.147919	0.139676	0.120064	0.127208	0.224594	0.220638	0.228569	0.216151	0.213795	0.216754	0.230229	0.221603	0.257444	0.264752	0.258868	0.265568		0.259598	0.270518	0.27319	0.257085	0.291654	0.279752	0.319907	0.311648	0.27608	0.286961	0.332008	0.330892	0.259014	0.285965	0.243332	0.248519	0.218093	0.246097	0.233751	0.218333	0.230939	0.245785	0.254541	0.251513
515	0.116072	0.113219	0.138747	0.143244	0.0892915	0.0915812	0.122844	0.117751	0.147438	0.139208	0.119563	0.126692	0.223981	0.22009	0.228059	0.215609	0.213236	0.216198	0.229623	0.221009	0.256712	0.26403	0.258108	0.264806		0.258959	0.269815	0.272471	0.25635	0.290937	0.279149	0.318788	0.310503	0.274784	0.285694	0.330806	0.32968	0.258332	0.28527	0.242721	0.247852	0.217484	0.245496	0.233047	0.217662	0.230276	0.245063	0.253738	0.250702
516	0.115588	0.112707	0.138238	0.142664	0.0888556	0.0911813	0.12241	0.117324	0.146962	0.13875	0.119068	0.126181	0.223371	0.219544	0.22756	0.215071	0.212681	0.215638	0.229024	0.22042	0.255983	0.263303	0.257351	0.264047		0.258326	0.269122	0.271755	0.255632	0.290222	0.27856	0.317629	0.30932	0.273451	0.284391	0.329566	0.328431	0.257653	0.284574	0.24212	0.247184	0.216874	0.244892	0.232343	0.216994	0.229625	0.244346	0.252932	0.249887
517	0.115105	0.112189	0.137728	0.142076	0.0884153	0.0907782	0.121978	0.116899	0.146486	0.138296	0.118573	0.12567	0.222759	0.218995	0.227065	0.214532	0.212125	0.215071	0.228423	0.219831	0.255251	0.262567	0.256592	0.263285		0.257692	0.268433	0.271039	0.254921	0.289504	0.277975	0.316436	0.308103	0.272085	0.283057	0.328294	0.327149	0.256971	0.283873	0.241521	0.246511	0.216261	0.244283	0.231634	0.216324	0.228977	0.243627	0.25212	0.249064
518	0.114617	0.111662	0.137211	0.141479	0.0879668	0.0903672	0.121542	0.116468	0.146003	0.137838	0.118071	0.125153	0.222139	0.218436	0.226565	0.213985	0.211563	0.214494	0.227816	0.219236	0.254511	0.261818	0.255826	0.262514		0.257051	0.267739	0.270316	0.254208	0.288777	0.277386	0.315214	0.306857	0.270694	0.281695	0.326994	0.325838	0.256282	0.283161	0.240916	0.245829	0.21564	0.243662	0.230917	0.215647	0.228325	0.2429	0.251297	0.248229
519	0.114116	0.111122	0.136681	0.140868	0.0875061	0.089944	0.121097	0.116028	0.145509	0.137369	0.117558	0.124625	0.221506	0.217863	0.22605	0.213425	0.210988	0.213903	0.227196	0.218629	0.253756	0.261053	0.255045	0.26173		0.256397	0.267034	0.269581	0.253485	0.288036	0.276784	0.313969	0.305589	0.269281	0.280311	0.32567	0.324503	0.255579	0.282435	0.240297	0.245134	0.215006	0.243025	0.230186	0.214958	0.22766	0.242161	0.250458	0.247379
520	0.113597	0.110568	0.136131	0.140239	0.0870296	0.0895039	0.120637	0.115573	0.144996	0.136882	0.117027	0.124078	0.220853	0.217268	0.225514	0.212845	0.210394	0.213296	0.226557	0.218005	0.252983	0.260268	0.254246	0.260927		0.255723	0.266308	0.268828	0.252742	0.287274	0.27616	0.312706	0.304303	0.267852	0.278908	0.324327	0.323148	0.254859	0.28169	0.239657	0.244422	0.214355	0.242368	0.22944	0.214253	0.226977	0.241402	0.249601	0.24651
521	0.113054	0.109996	0.135557	0.13959	0.0865333	0.0890425	0.120156	0.115099	0.14446	0.13637	0.116471	0.123508	0.220177	0.216646	0.224947	0.212241	0.209777	0.212668	0.225893	0.217357	0.252184	0.25946	0.253422	0.260099		0.255024	0.265556	0.268051	0.251971	0.286487	0.275504	0.31143	0.303005	0.266414	0.277492	0.322968	0.321777	0.254115	0.280923	0.238988	0.243691	0.213683	0.241686	0.228673	0.213527	0.226266	0.240619	0.24872	0.245618
522	0.11248	0.109405	0.134951	0.138916	0.0860134	0.0885552	0.119649	0.114599	0.143894	0.135825	0.115886	0.122909	0.21947	0.215992	0.224341	0.211606	0.209131	0.212017	0.225197	0.216681	0.251355	0.258624	0.252567	0.259242		0.254294	0.264769	0.267245	0.251163	0.285668	0.274808	0.310145	0.301699	0.26497	0.276067	0.321599	0.320394	0.253343	0.280128	0.238281	0.242935	0.212986	0.240974	0.227882	0.212775	0.22552	0.239806	0.247811	0.2447
523	0.111868	0.10879	0.134308	0.138215	0.0854661	0.0880375	0.119111	0.114069	0.143292	0.13524	0.115264	0.122275	0.218729	0.215299	0.223687	0.210935	0.208449	0.211338	0.224463	0.215971	0.250489	0.257757	0.251676	0.258351		0.253525	0.263939	0.266405	0.250309	0.284813	0.274063	0.308858	0.300391	0.263526	0.274636	0.320223	0.319004	0.252537	0.279302	0.23753	0.242151	0.212259	0.240228	0.227063	0.211991	0.224732	0.238958	0.246871	0.243751
524	0.111223	0.108146	0.133627	0.137475	0.0848819	0.0874828	0.118542	0.113509	0.142655	0.134619	0.114602	0.121599	0.217955	0.214565	0.222995	0.210227	0.207736	0.210625	0.223695	0.215233	0.24959	0.256851	0.250749	0.257423		0.252726	0.263077	0.26553	0.249424	0.283917	0.273283	0.30751	0.29902	0.262023	0.273144	0.31878	0.317547	0.251706	0.278447	0.236743	0.241343	0.211514	0.239448	0.226215	0.211184	0.223915	0.238075	0.245894	0.242769
525	0.110553	0.10747	0.132915	0.136693	0.0842587	0.0868921	0.117947	0.112926	0.141993	0.133974	0.113902	0.120882	0.217157	0.213798	0.222279	0.209489	0.206999	0.209878	0.222903	0.21448	0.248664	0.255903	0.249793	0.256466		0.251907	0.262199	0.264628	0.248526	0.282987	0.272489	0.306058	0.297544	0.260416	0.271548	0.317229	0.315982	0.250863	0.27757	0.235935	0.24052	0.210764	0.238638	0.225342	0.210361	0.223087	0.237168	0.24488	0.241754
526	0.109863	0.106768	0.132176	0.135879	0.0836046	0.0862725	0.117333	0.112324	0.14131	0.133307	0.113173	0.120134	0.216337	0.213002	0.221543	0.208725	0.206241	0.209101	0.22209	0.213711	0.247716	0.254922	0.248812	0.255484		0.25107	0.261307	0.263702	0.247616	0.282028	0.27168	0.304529	0.295988	0.258733	0.269876	0.315596	0.314337	0.250006	0.276672	0.235107	0.239682	0.210006	0.237804	0.224448	0.209525	0.222247	0.236239	0.243837	0.240712
527	0.109155	0.106046	0.131417	0.135039	0.0829272	0.085631	0.116703	0.111707	0.140609	0.132625	0.112422	0.119363	0.215499	0.212182	0.220788	0.207941	0.205465	0.208303	0.221259	0.212929	0.246748	0.253915	0.247811	0.254481		0.250216	0.260399	0.262756	0.246694	0.281046	0.270857	0.302949	0.294382	0.257002	0.268154	0.313911	0.312638	0.249136	0.275756	0.234262	0.238829	0.209239	0.236949	0.223538	0.208675	0.221393	0.235291	0.24277	0.239648
528	0.108433	0.10531	0.130642	0.134183	0.0822345	0.0849746	0.116063	0.11108	0.139895	0.131931	0.111656	0.118576	0.214647	0.211344	0.220016	0.20714	0.204675	0.207488	0.220413	0.212134	0.245765	0.252889	0.246795	0.253462		0.249347	0.259478	0.261796	0.245759	0.280047	0.270019	0.301346	0.292752	0.255249	0.266408	0.3122	0.310914	0.248252	0.274825	0.2334	0.237963	0.208458	0.236076	0.222613	0.207812	0.220526	0.234329	0.241686	0.238567
529	0.1077	0.104566	0.129857	0.133319	0.0815342	0.0843103	0.115417	0.110448	0.139173	0.131229	0.110883	0.117784	0.213782	0.210494	0.21923	0.206327	0.203873	0.206664	0.219554	0.211326	0.24477	0.251852	0.245767	0.252432		0.248464	0.258543	0.260825	0.24481	0.279036	0.269166	0.299745	0.291125	0.253501	0.264663	0.310491	0.309192	0.247353	0.27388	0.232524	0.237084	0.207662	0.235191	0.221679	0.206936	0.219644	0.233354	0.240591	0.237474
530	0.106959	0.103818	0.129066	0.132454	0.0808343	0.0836451	0.114769	0.109813	0.138447	0.130525	0.110112	0.116994	0.212909	0.209635	0.218432	0.205508	0.203061	0.205836	0.218685	0.210507	0.243766	0.250812	0.244733	0.251395		0.247569	0.257594	0.259848	0.243848	0.278021	0.268298	0.298171	0.289528	0.251783	0.262946	0.30881	0.307497	0.246441	0.272925	0.231635	0.236193	0.206848	0.234296	0.220738	0.206049	0.218747	0.232371	0.239491	0.236374
531	0.106215	0.103075	0.128276	0.131598	0.0801424	0.0829861	0.114125	0.109182	0.137721	0.129823	0.109348	0.116215	0.212029	0.208774	0.217624	0.204687	0.202244	0.20501	0.21781	0.209677	0.242757	0.249775	0.243697	0.250356		0.246663	0.256634	0.25887	0.242871	0.277006	0.267415	0.29665	0.287987	0.250121	0.261281	0.307184	0.305856	0.245513	0.271961	0.230735	0.23529	0.206014	0.233395	0.219795	0.205151	0.217833	0.231382	0.238392	0.235272
532	0.105469	0.102339	0.127491	0.130758	0.0794665	0.0823402	0.113489	0.108557	0.137	0.129126	0.1086	0.115455	0.211147	0.207916	0.216807	0.203869	0.201423	0.204194	0.216931	0.208838	0.241747	0.248749	0.242664	0.249319		0.245747	0.255661	0.257893	0.241879	0.275998	0.266516	0.295207	0.286527	0.248541	0.259691	0.305639	0.304295	0.24457	0.270992	0.229826	0.234375	0.205156	0.232494	0.218852	0.204243	0.216901	0.230391	0.237302	0.234173
533	0.104694	0.101584	0.126679	0.1299	0.0787729	0.0816754	0.112833	0.107911	0.136249	0.128404	0.10783	0.114677	0.210232	0.207026	0.215953	0.203022	0.200569	0.203353	0.216019	0.207964	0.240702	0.247696	0.241597	0.248249		0.244794	0.25465	0.256888	0.240848	0.274962	0.265576	0.293765	0.285071	0.246965	0.258102	0.304097	0.302734	0.243588	0.269986	0.228875	0.233425	0.204253	0.231557	0.217882	0.203297	0.215924	0.229369	0.236183	0.233043
534	0.103861	0.10078	0.125812	0.128987	0.0780272	0.0809597	0.112132	0.10722	0.135439	0.12763	0.107	0.113842	0.209257	0.206071	0.215035	0.202115	0.199655	0.202458	0.215046	0.207032	0.239592	0.246576	0.240466	0.247114		0.243777	0.253579	0.255824	0.239755	0.273865	0.264571	0.292242	0.283534	0.245311	0.256431	0.302471	0.301087	0.242546	0.268919	0.227857	0.232416	0.203287	0.230556	0.216857	0.202294	0.21488	0.228288	0.235001	0.231849
535	0.102977	0.0999326	0.124895	0.128026	0.0772363	0.0801994	0.111392	0.106489	0.134578	0.126809	0.106119	0.11296	0.20823	0.20506	0.214062	0.201157	0.198688	0.201515	0.21402	0.20605	0.238425	0.245398	0.239278	0.245923		0.242706	0.252456	0.254709	0.23861	0.272714	0.26351	0.290649	0.281928	0.243592	0.25469	0.300774	0.299368	0.241452	0.267798	0.226778	0.231357	0.202266	0.229498	0.215785	0.20124	0.213778	0.227155	0.233762	0.2306
536	0.102051	0.0990487	0.123936	0.127024	0.0764067	0.0794014	0.110619	0.105724	0.133673	0.12595	0.105195	0.112037	0.207158	0.204	0.21304	0.200155	0.197677	0.200531	0.212949	0.205024	0.237209	0.244171	0.23804	0.244683		0.241587	0.251287	0.25355	0.237419	0.271517	0.2624	0.289001	0.280267	0.241819	0.252893	0.299021	0.29759	0.240312	0.26663	0.225648	0.230255	0.201197	0.22839	0.214672	0.200143	0.212625	0.225978	0.232476	0.229303
537	0.101089	0.0981344	0.122942	0.125989	0.0755452	0.0785721	0.109818	0.104932	0.132734	0.12506	0.104236	0.111082	0.206048	0.2029	0.211978	0.199116	0.196629	0.199513	0.21184	0.203963	0.235953	0.242903	0.236763	0.243403		0.240428	0.250081	0.252355	0.23619	0.270281	0.26125	0.287309	0.278563	0.240006	0.251053	0.297223	0.295767	0.239135	0.265424	0.224476	0.229116	0.200089	0.227242	0.213525	0.199009	0.21143	0.224764	0.23115	0.227967
538	0.100098	0.0971958	0.121919	0.124927	0.0746587	0.0777183	0.108997	0.104118	0.131766	0.124145	0.103252	0.110103	0.204908	0.201767	0.210883	0.198047	0.19555	0.198468	0.210701	0.202873	0.234665	0.241603	0.235454	0.242091		0.239237	0.248843	0.251129	0.234931	0.269013	0.260067	0.285587	0.276829	0.238166	0.249183	0.295395	0.293913	0.237926	0.264187	0.223269	0.227949	0.198949	0.226062	0.212351	0.197845	0.210201	0.22352	0.229793	0.226599
539	0.0990862	0.0962394	0.120876	0.123845	0.0737537	0.0768465	0.108162	0.103288	0.130779	0.123213	0.102249	0.109106	0.203746	0.200611	0.209764	0.196956	0.194449	0.197404	0.209538	0.201761	0.233353	0.240279	0.234121	0.240755		0.238022	0.247581	0.249882	0.233648	0.267723	0.258858	0.283847	0.275078	0.23631	0.247296	0.293549	0.29204	0.236693	0.262927	0.222037	0.22676	0.197784	0.224857	0.211157	0.19666	0.208945	0.222254	0.228413	0.225208
540	0.0980602	0.0952712	0.119819	0.122751	0.0728371	0.0759633	0.107317	0.102449	0.129781	0.122271	0.101236	0.1081	0.202568	0.19944	0.208627	0.19585	0.193333	0.196326	0.208359	0.200633	0.232025	0.238939	0.232773	0.239405		0.23679	0.246303	0.24862	0.23235	0.266416	0.257632	0.2821	0.273321	0.23445	0.245403	0.291697	0.290162	0.235444	0.261652	0.220786	0.225556	0.196603	0.223636	0.209949	0.195459	0.207671	0.220972	0.227016	0.223802
541	0.0970274	0.0942975	0.118755	0.121651	0.0719155	0.0750753	0.10647	0.101606	0.128778	0.121326	0.100221	0.107092	0.201382	0.198261	0.207482	0.194738	0.19221	0.195243	0.207173	0.199498	0.23069	0.237592	0.231418	0.238047		0.235548	0.245016	0.247351	0.231044	0.2651	0.256396	0.28036	0.271572	0.232599	0.243518	0.289852	0.288291	0.234184	0.26037	0.219527	0.224345	0.195412	0.222406	0.208735	0.194251	0.206386	0.219681	0.225613	0.222388
542	0.095995	0.0933246	0.117692	0.120552	0.0709958	0.0741892	0.105625	0.100766	0.12778	0.120384	0.0992121	0.10609	0.200197	0.197083	0.206336	0.193625	0.191086	0.194161	0.205985	0.198363	0.229357	0.236246	0.230064	0.23669		0.234305	0.243726	0.246081	0.229737	0.263784	0.255158	0.278638	0.269841	0.230768	0.241652	0.288026	0.286439	0.232921	0.259089	0.218268	0.223134	0.194219	0.221176	0.207521	0.193043	0.2051	0.21839	0.22421	0.220976
543	0.0949703	0.0923587	0.116636	0.119462	0.0700846	0.0733116	0.10479	0.0999337	0.126792	0.119453	0.0982172	0.105101	0.199018	0.195915	0.205196	0.19252	0.18997	0.193088	0.204804	0.197233	0.228032	0.234911	0.22872	0.235343		0.233068	0.242441	0.244818	0.228437	0.262475	0.253926	0.276945	0.268141	0.228969	0.239817	0.286232	0.28462	0.231662	0.257816	0.217016	0.221931	0.193032	0.219954	0.206315	0.191841	0.20382	0.217106	0.222816	0.219572
544	0.0939606	0.091406	0.115594	0.118387	0.0691886	0.0724491	0.103969	0.0991153	0.125824	0.118539	0.0972441	0.104131	0.197854	0.194763	0.204071	0.19143	0.188869	0.192029	0.203637	0.196117	0.226726	0.233593	0.227395	0.234014		0.231844	0.241168	0.24357	0.227151	0.261179	0.252707	0.275294	0.266482	0.227213	0.238025	0.28448	0.282845	0.230415	0.256559	0.215781	0.220741	0.191859	0.218748	0.205122	0.190652	0.202554	0.215835	0.221439	0.218186
545	0.092973	0.0904728	0.114574	0.117334	0.0683147	0.0716084	0.103169	0.0983166	0.124881	0.11765	0.0963005	0.10319	0.196712	0.193638	0.202968	0.190362	0.18779	0.190994	0.202492	0.195021	0.225445	0.232302	0.226095	0.232712		0.230642	0.239915	0.242343	0.225887	0.259905	0.251509	0.273695	0.264878	0.22551	0.236288	0.282783	0.281126	0.229185	0.255326	0.214571	0.219574	0.190707	0.217567	0.203951	0.189485	0.20131	0.214584	0.220087	0.216824
546	0.0920148	0.0895653	0.113582	0.116311	0.0674695	0.0707959	0.102395	0.0975432	0.123973	0.116791	0.095394	0.102283	0.1956	0.192546	0.201895	0.189324	0.186742	0.189987	0.201375	0.193953	0.224199	0.231046	0.224831	0.231443		0.229469	0.238688	0.241146	0.224652	0.258661	0.25034	0.27216	0.263338	0.223873	0.234615	0.281151	0.279475	0.227981	0.254125	0.213394	0.218435	0.189583	0.216417	0.202808	0.188346	0.200096	0.213362	0.218768	0.215495
547	0.0910932	0.0886897	0.112626	0.115324	0.0666597	0.0700184	0.101653	0.096801	0.123106	0.11597	0.0945325	0.101418	0.194524	0.191496	0.20086	0.188324	0.18573	0.189018	0.200295	0.192919	0.222996	0.229834	0.22361	0.230218		0.228332	0.237495	0.239984	0.223454	0.257453	0.249208	0.270699	0.261873	0.222311	0.23302	0.279597	0.277903	0.22681	0.252963	0.212258	0.217332	0.188496	0.215308	0.201699	0.187243	0.198921	0.212175	0.21749	0.214208
548	0.0902156	0.0878522	0.111713	0.11438	0.0658922	0.0692824	0.100949	0.0960954	0.122287	0.115193	0.0937233	0.100602	0.193493	0.190497	0.199871	0.187368	0.184763	0.188091	0.199258	0.191926	0.221843	0.228673	0.22244	0.229043		0.227239	0.236342	0.238866	0.2223	0.25629	0.24812	0.269324	0.260496	0.220836	0.231511	0.278131	0.276423	0.225677	0.251849	0.211173	0.216273	0.187452	0.214247	0.200632	0.186182	0.197792	0.211031	0.216261	0.21297
549	0.0893891	0.0870592	0.110849	0.113486	0.0651736	0.0685946	0.100288	0.0954322	0.121523	0.114466	0.0929742	0.0998422	0.192514	0.189556	0.198936	0.186464	0.183849	0.187216	0.198273	0.190982	0.22075	0.227573	0.22133	0.227928		0.226198	0.235238	0.237798	0.221198	0.255179	0.247084	0.268046	0.259215	0.219458	0.230101	0.276764	0.275044	0.224591	0.25079	0.210147	0.215264	0.18646	0.213243	0.199613	0.18517	0.196717	0.209936	0.215089	0.211789
550	0.088621	0.0863168	0.110043	0.112651	0.0645107	0.0679616	0.0996761	0.0948169	0.120823	0.113796	0.0922925	0.0991454	0.191594	0.188682	0.198062	0.185619	0.182994	0.186398	0.197346	0.190094	0.219724	0.226542	0.220289	0.226881		0.225216	0.234189	0.236789	0.220155	0.254127	0.246109	0.266874	0.258044	0.218187	0.228801	0.275507	0.273779	0.223559	0.249795	0.209188	0.214312	0.185528	0.212304	0.19865	0.184216	0.195705	0.208898	0.213982	0.210674
551	0.0878467	0.0855635	0.109224	0.111805	0.0638478	0.0673347	0.0990616	0.0941968	0.120123	0.113122	0.0916177	0.0984514	0.190662	0.187811	0.197184	0.184768	0.182135	0.185577	0.196407	0.189194	0.218692	0.22551	0.219243	0.22583		0.224228	0.233124	0.235771	0.219103	0.253068	0.245128	0.265729	0.256902	0.216947	0.227527	0.274273	0.272537	0.222506	0.248801	0.208234	0.213355	0.184579	0.211368	0.197674	0.183247	0.194682	0.207847	0.212869	0.209551
552	0.0870107	0.0847474	0.108336	0.110893	0.0631363	0.06667	0.0984005	0.0935271	0.119372	0.11239	0.090896	0.0977079	0.189658	0.186887	0.196244	0.183853	0.181215	0.1847	0.195395	0.188224	0.217593	0.224417	0.21813	0.224713		0.223176	0.231983	0.234688	0.217982	0.251944	0.244085	0.264536	0.255718	0.215666	0.226206	0.272983	0.271238	0.22137	0.247755	0.20723	0.212338	0.183553	0.21038	0.196627	0.182203	0.193584	0.206723	0.211688	0.208358
553	0.0861335	0.083889	0.1074	0.109938	0.0623935	0.0659817	0.0977092	0.0928248	0.118587	0.111621	0.0901456	0.0969332	0.188605	0.185927	0.195263	0.182895	0.180254	0.183786	0.194334	0.187207	0.216448	0.223283	0.216973	0.223554		0.22208	0.230791	0.23356	0.216814	0.250777	0.243	0.263318	0.254514	0.214365	0.224859	0.271662	0.269909	0.220177	0.246674	0.206192	0.21128	0.182472	0.209358	0.195534	0.181109	0.192435	0.205549	0.210461	0.20712
554	0.0852359	0.0830089	0.106441	0.10896	0.0616365	0.0652836	0.097004	0.0921072	0.117787	0.110833	0.0893842	0.0961458	0.187527	0.184951	0.19426	0.181916	0.179273	0.182854	0.193247	0.186166	0.215281	0.222131	0.215794	0.222374		0.220963	0.22957	0.23241	0.215623	0.249588	0.241894	0.262097	0.25331	0.213066	0.223511	0.270335	0.268573	0.218953	0.245577	0.205139	0.210202	0.181363	0.20832	0.194415	0.179987	0.19126	0.20435	0.209212	0.205858
555	0.0843384	0.0821277	0.105479	0.107982	0.0608828	0.06459	0.0963011	0.0913913	0.116991	0.110048	0.0886295	0.095364	0.186447	0.183977	0.193256	0.180937	0.178291	0.181923	0.192157	0.185122	0.214115	0.220981	0.214618	0.221196		0.219846	0.228344	0.231259	0.21443	0.248398	0.240785	0.260896	0.252127	0.211788	0.222182	0.269027	0.267257	0.217723	0.244481	0.204088	0.209123	0.180251	0.207283	0.193295	0.178862	0.190082	0.203147	0.207963	0.204596
556	0.0834617	0.081266	0.104539	0.107027	0.0601495	0.0639146	0.0956165	0.0906938	0.116218	0.109283	0.0878992	0.094606	0.185387	0.183023	0.192271	0.179979	0.17733	0.181012	0.191088	0.184097	0.212973	0.219854	0.213467	0.220042		0.218748	0.227137	0.230129	0.213256	0.247228	0.239694	0.259736	0.250987	0.210553	0.220896	0.267762	0.265985	0.216512	0.243406	0.203056	0.208063	0.179159	0.206266	0.192195	0.177759	0.188927	0.201965	0.206739	0.203358
557	0.0826264	0.0804442	0.103644	0.106117	0.0594538	0.0632717	0.0949663	0.0900316	0.115485	0.108559	0.0872107	0.0938897	0.184372	0.182109	0.191325	0.179062	0.17641	0.180141	0.190063	0.183115	0.211878	0.218772	0.212363	0.218935		0.217692	0.225973	0.229042	0.212125	0.2461	0.238641	0.25864	0.249908	0.20938	0.219672	0.266564	0.264781	0.215345	0.242367	0.202061	0.207042	0.178112	0.205286	0.191138	0.1767	0.187817	0.200826	0.205561	0.202167
558	0.0818532	0.0796831	0.102814	0.105273	0.0588131	0.0626752	0.0943663	0.0894214	0.114813	0.107895	0.0865815	0.093233	0.183425	0.181252	0.190439	0.178208	0.17555	0.179328	0.189106	0.182198	0.210853	0.217756	0.211331	0.217897		0.216698	0.224875	0.22802	0.211059	0.245036	0.237646	0.257628	0.248911	0.208288	0.218534	0.265457	0.26367	0.21425	0.241385	0.201121	0.206081	0.177137	0.20436	0.190147	0.175709	0.186777	0.199755	0.204452	0.201045
559	0.0811627	0.0790031	0.102075	0.104519	0.0582445	0.0621392	0.0938324	0.0888797	0.114217	0.10731	0.0860289	0.0926538	0.182569	0.180472	0.189631	0.177438	0.174771	0.178591	0.18824	0.181367	0.20992	0.216828	0.210393	0.216952		0.215787	0.223867	0.227083	0.210079	0.244056	0.236728	0.256723	0.248017	0.207299	0.217502	0.264464	0.262675	0.213249	0.240476	0.200252	0.205198	0.176257	0.203506	0.189246	0.174812	0.185832	0.198775	0.203437	0.200017
560	0.0805755	0.0784248	0.101448	0.103875	0.0577654	0.0616776	0.0933803	0.0884232	0.113718	0.106824	0.0855701	0.0921698	0.181828	0.179786	0.188924	0.176773	0.174093	0.177951	0.187489	0.180646	0.209104	0.216009	0.209572	0.21612		0.214981	0.222973	0.226254	0.209208	0.243181	0.235907	0.255945	0.247245	0.20643	0.216597	0.263609	0.261821	0.212371	0.239659	0.199474	0.204415	0.175497	0.202743	0.188455	0.17403	0.185005	0.197908	0.202537	0.199105
561	0.08005	0.0779026	0.100889	0.1033	0.057351	0.0612681	0.0929793	0.0880224	0.113286	0.106402	0.0851781	0.0917479	0.181154	0.179159	0.188274	0.176169	0.173472	0.177365	0.186803	0.17998	0.208349	0.215254	0.208815	0.215354		0.214226	0.222129	0.225476	0.208385	0.242361	0.235124	0.255253	0.246556	0.205643	0.215779	0.26285	0.261065	0.211555	0.238894	0.198749	0.203687	0.174813	0.202036	0.187728	0.173312	0.184243	0.197102	0.2017	0.19825
562	0.0795342	0.0773817	0.100342	0.10274	0.0569643	0.0608792	0.0925901	0.0876383	0.112881	0.106003	0.0848145	0.0913448	0.18049	0.178544	0.18763	0.175573	0.172854	0.176781	0.186122	0.179308	0.207594	0.214509	0.208062	0.214592		0.213463	0.221267	0.224685	0.207542	0.241534	0.234319	0.254593	0.2459	0.204886	0.214994	0.262131	0.260351	0.210734	0.238132	0.198032	0.202962	0.174147	0.201344	0.187006	0.172593	0.183482	0.196292	0.200865	0.197385
563	0.0790332	0.0768695	0.0998119	0.102198	0.0566043	0.0605113	0.0922161	0.0872726	0.112503	0.105626	0.0844791	0.0909631	0.17984	0.177947	0.186998	0.17499	0.172245	0.176207	0.185453	0.17864	0.206848	0.21378	0.207319	0.213843		0.212703	0.220399	0.223894	0.206695	0.240711	0.233504	0.25397	0.245281	0.204165	0.214246	0.261453	0.25968	0.209917	0.23738	0.19733	0.202246	0.173501	0.20067	0.186295	0.171882	0.18273	0.195489	0.200041	0.196522
564	0.0785523	0.0763735	0.0993031	0.101678	0.0562701	0.0601648	0.0918606	0.0869273	0.112151	0.105273	0.0841718	0.0906054	0.179211	0.17737	0.186383	0.174426	0.171654	0.17565	0.184803	0.177985	0.20612	0.213074	0.206597	0.213115		0.211955	0.219541	0.223116	0.205857	0.239903	0.232696	0.253386	0.244703	0.203483	0.213538	0.260819	0.259054	0.209114	0.236645	0.196646	0.201546	0.172878	0.200017	0.185603	0.171188	0.181996	0.194701	0.199236	0.195673
565	0.0780964	0.0759009	0.0988205	0.101186	0.0559608	0.0598402	0.0915269	0.086604	0.111827	0.104947	0.0838924	0.0902744	0.178609	0.176819	0.185792	0.173887	0.171087	0.175117	0.184179	0.177354	0.205421	0.212396	0.205905	0.212415		0.21123	0.218705	0.222362	0.205043	0.239119	0.231909	0.252847	0.244168	0.202844	0.212874	0.260231	0.258474	0.208335	0.235932	0.195986	0.200868	0.17228	0.199388	0.184937	0.170519	0.181288	0.193938	0.19846	0.194851
566	0.0776708	0.0754591	0.0983686	0.100724	0.0556753	0.0595378	0.0912182	0.0863047	0.111528	0.104648	0.0836408	0.0899727	0.178038	0.176297	0.18523	0.173379	0.170551	0.174614	0.183588	0.176757	0.20476	0.211752	0.20525	0.211751		0.210539	0.217906	0.221644	0.204266	0.23837	0.231159	0.252355	0.24368	0.202254	0.212257	0.25969	0.257944	0.207589	0.23525	0.195355	0.20022	0.17171	0.198785	0.184303	0.169883	0.180615	0.193209	0.197721	0.194069
567	0.0772807	0.0750555	0.0979523	0.100298	0.0554126	0.059258	0.0909379	0.0860311	0.111257	0.104378	0.0834169	0.089703	0.177505	0.175809	0.184704	0.172908	0.170055	0.174149	0.183036	0.176204	0.204146	0.21115	0.204642	0.211132		0.209891	0.217158	0.220976	0.20354	0.237666	0.23046	0.251914	0.243244	0.201715	0.211691	0.259198	0.257463	0.206885	0.234604	0.194756	0.199607	0.171171	0.198212	0.183709	0.169291	0.179984	0.192524	0.197027	0.193338
568	0.076931	0.0746973	0.0975762	0.099911	0.0551719	0.0590014	0.0906891	0.0857851	0.111011	0.104139	0.0832207	0.0894677	0.177015	0.17536	0.184218	0.172479	0.169605	0.17373	0.182531	0.175705	0.203589	0.210595	0.20409	0.210564		0.209297	0.216474	0.22037	0.20288	0.237017	0.229827	0.251528	0.242862	0.201232	0.211179	0.258758	0.257035	0.206235	0.234	0.194195	0.199036	0.170666	0.197672	0.183162	0.16875	0.179405	0.191893	0.196388	0.192672
569	0.0766271	0.074392	0.0972449	0.0995676	0.0549521	0.0587682	0.0904751	0.0855685	0.110792	0.103932	0.0830518	0.0892696	0.176575	0.174953	0.183779	0.172098	0.169208	0.173362	0.182079	0.175271	0.2031	0.210093	0.203603	0.210056		0.208767	0.215869	0.219838	0.2023	0.236433	0.229275	0.2512	0.242539	0.20081	0.210724	0.258371	0.25666	0.205646	0.233446	0.193677	0.198515	0.170196	0.197168	0.182668	0.168269	0.178885	0.191324	0.195813	0.192082
570	0.0763917	0.0741563	0.0969804	0.0992924	0.054784	0.0585807	0.0903114	0.0853989	0.110631	0.103791	0.0829454	0.0891342	0.176208	0.174611	0.183406	0.171787	0.168877	0.173064	0.181698	0.174907	0.202694	0.209665	0.203198	0.209627		0.20831	0.215346	0.219381	0.201802	0.235919	0.228806	0.250966	0.242304	0.200479	0.210361	0.25808	0.256385	0.205135	0.232967	0.193222	0.198067	0.169801	0.196724	0.182244	0.16786	0.178436	0.190827	0.195314	0.191579
571	0.0762354	0.0739941	0.0967927	0.0990981	0.0546902	0.0584542	0.0902053	0.0852864	0.11055	0.103739	0.0829258	0.0890765	0.175926	0.174348	0.183104	0.171558	0.168615	0.172843	0.181392	0.174609	0.202375	0.209318	0.202879	0.209282		0.207923	0.214895	0.218985	0.201374	0.235466	0.228404	0.250845	0.242176	0.200255	0.210109	0.257912	0.256237	0.204703	0.232575	0.19284	0.197702	0.169505	0.196355	0.181894	0.167525	0.178056	0.190395	0.194891	0.191156
572	0.0761448	0.0738934	0.0966694	0.098971	0.0546573	0.0583784	0.0901478	0.085222	0.110535	0.10376	0.0829774	0.0890833	0.175715	0.174148	0.182863	0.171396	0.168411	0.172685	0.181149	0.174368	0.202128	0.20904	0.202633	0.209007		0.207594	0.214504	0.218645	0.201006	0.235067	0.228059	0.250818	0.242139	0.200122	0.209951	0.257846	0.256196	0.204337	0.232254	0.192518	0.197405	0.169287	0.196047	0.181606	0.167251	0.177736	0.190021	0.194534	0.190801
573	0.0761065	0.0738423	0.0965979	0.0988975	0.0546717	0.0583432	0.0901298	0.0851965	0.110571	0.103836	0.0830844	0.0891415	0.17556	0.174001	0.182671	0.171288	0.168255	0.172577	0.180958	0.174173	0.20194	0.208817	0.202447	0.20879		0.207314	0.214164	0.218351	0.20069	0.234715	0.227764	0.250868	0.242175	0.200064	0.209868	0.257862	0.25624	0.204024	0.231989	0.192245	0.197163	0.16913	0.195789	0.181369	0.167029	0.177466	0.189696	0.194231	0.190504
574	0.0761069	0.0738286	0.0965656	0.098864	0.0547201	0.0583384	0.0901425	0.0852006	0.110645	0.103952	0.0832311	0.089238	0.175447	0.173892	0.182516	0.171219	0.168137	0.172508	0.180806	0.174017	0.201798	0.208637	0.202305	0.208618		0.207072	0.213864	0.218097	0.200415	0.2344	0.227508	0.250978	0.24227	0.200063	0.209844	0.257938	0.256347	0.203751	0.231764	0.192009	0.196959	0.169015	0.195568	0.181172	0.166847	0.177236	0.189409	0.19397	0.190251
575	0.0761327	0.0738403	0.0965599	0.0988568	0.054789	0.0583539	0.0901769	0.0852255	0.110741	0.104089	0.0834018	0.0893597	0.17536	0.17381	0.182388	0.171175	0.168047	0.172465	0.180682	0.17389	0.201689	0.208487	0.202196	0.208477		0.206859	0.213596	0.217874	0.200172	0.234116	0.227283	0.251128	0.242406	0.200103	0.20986	0.258056	0.256496	0.203506	0.231563	0.191799	0.196779	0.168923	0.195371	0.181003	0.166694	0.177037	0.189153	0.193742	0.190032
576	0.0761705	0.0738655	0.0965684	0.0988624	0.0548649	0.0583796	0.0902242	0.0852618	0.110847	0.104233	0.0835809	0.0894934	0.175287	0.17374	0.182274	0.171144	0.167975	0.172435	0.180575	0.173784	0.201598	0.208355	0.202105	0.208354		0.206663	0.213348	0.217676	0.199952	0.233855	0.22708	0.251301	0.242567	0.200168	0.209899	0.258193	0.256665	0.203275	0.23137	0.191604	0.196609	0.168835	0.195185	0.180851	0.166561	0.176858	0.188917	0.193535	0.189835
577	0.0762068	0.0738922	0.0965784	0.0988671	0.0549344	0.0584051	0.0902752	0.0853004	0.110947	0.104365	0.0837525	0.089626	0.175212	0.173671	0.182163	0.171111	0.16791	0.172404	0.180472	0.173689	0.201513	0.208228	0.20202	0.208237		0.206476	0.21311	0.217494	0.199745	0.233609	0.226889	0.251479	0.242738	0.200241	0.209944	0.25833	0.256832	0.203047	0.231171	0.19141	0.196433	0.168732	0.194998	0.180704	0.166435	0.17669	0.188693	0.193338	0.189647
578	0.0762282	0.0739082	0.0965774	0.0988572	0.0549841	0.0584205	0.0903212	0.0853323	0.111028	0.10447	0.0839009	0.0897443	0.175121	0.173589	0.182044	0.171062	0.167843	0.172362	0.180362	0.173597	0.201419	0.208094	0.201926	0.208112		0.206286	0.212874	0.217322	0.199542	0.233371	0.226702	0.251645	0.242902	0.200306	0.209977	0.258447	0.256977	0.202808	0.230949	0.191208	0.196237	0.168595	0.194798	0.180552	0.166307	0.176523	0.188472	0.193139	0.189458
579	0.0762213	0.0739017	0.0965529	0.0988192	0.0550005	0.0584155	0.0903532	0.0853483	0.111075	0.10453	0.0840103	0.0898352	0.174999	0.173481	0.181905	0.170984	0.167764	0.172294	0.180234	0.173499	0.201305	0.207939	0.201809	0.207966		0.206083	0.212627	0.217151	0.199334	0.233132	0.226509	0.251779	0.243043	0.200347	0.209981	0.258522	0.257077	0.202546	0.230688	0.190984	0.196005	0.168407	0.194571	0.180383	0.166165	0.176347	0.188244	0.192929	0.189255
580	0.0762451	0.0739354	0.0965623	0.0988152	0.0550394	0.0584304	0.0904222	0.0853972	0.11115	0.104608	0.0841464	0.0899602	0.174915	0.173406	0.181804	0.170942	0.167741	0.172262	0.180151	0.173451	0.201242	0.207833	0.201743	0.207872		0.20593	0.212442	0.217049	0.199187	0.232958	0.226381	0.251968	0.243243	0.200442	0.210035	0.258644	0.257225	0.202327	0.230457	0.190811	0.195802	0.168238	0.194382	0.18026	0.16608	0.176231	0.188065	0.192772	0.189106
581	0.0763548	0.074065	0.0966584	0.0989026	0.0551539	0.0585037	0.0905726	0.0855218	0.111313	0.104765	0.084371	0.0901757	0.174933	0.173417	0.181792	0.170994	0.16783	0.172318	0.18017	0.173502	0.201296	0.20784	0.201791	0.207894		0.205881	0.212375	0.217072	0.19916	0.232902	0.226374	0.252289	0.243576	0.200666	0.210213	0.258897	0.257507	0.202211	0.23032	0.190748	0.195688	0.168158	0.194289	0.180236	0.166111	0.176229	0.187983	0.192727	0.189068
582	0.0765309	0.074268	0.0968221	0.0990604	0.0553264	0.0586231	0.0907852	0.0857046	0.111542	0.104982	0.0846633	0.0904607	0.175027	0.173494	0.181849	0.171119	0.168006	0.172444	0.180268	0.17363	0.201439	0.207931	0.201927	0.208003		0.20591	0.212399	0.217189	0.199223	0.232937	0.226458	0.252713	0.244012	0.200989	0.210489	0.259251	0.257893	0.202174	0.230253	0.190768	0.195641	0.168147	0.194269	0.180289	0.166229	0.176317	0.187977	0.192768	0.189118
583	0.076754	0.0745219	0.0970339	0.0992679	0.0555389	0.0587759	0.0910406	0.0859276	0.111816	0.10524	0.085002	0.0907941	0.175174	0.173619	0.181954	0.171295	0.16824	0.172618	0.18042	0.173813	0.201645	0.208081	0.202124	0.208175		0.205996	0.212486	0.217371	0.19935	0.233033	0.226604	0.25321	0.244521	0.201383	0.210834	0.259678	0.258354	0.202192	0.230235	0.190844	0.195641	0.168183	0.194297	0.180396	0.166409	0.176466	0.188025	0.192869	0.189229
584	0.0770048	0.074804	0.0972746	0.0995041	0.055774	0.0589497	0.0913195	0.0861732	0.112115	0.10552	0.0853661	0.0911547	0.175352	0.173772	0.182087	0.171499	0.168505	0.17282	0.180604	0.174029	0.201885	0.208265	0.202356	0.208381		0.206114	0.212607	0.217589	0.199513	0.233163	0.226784	0.25375	0.245075	0.201821	0.211222	0.260147	0.258859	0.202241	0.230243	0.190949	0.195668	0.168245	0.194352	0.180534	0.166622	0.17665	0.188107	0.193006	0.189376
585	0.0772636	0.0750919	0.0975248	0.0997482	0.0560138	0.0591319	0.0916028	0.0864235	0.112418	0.105803	0.0857344	0.0915214	0.175535	0.173933	0.182228	0.17171	0.168775	0.17303	0.180796	0.174256	0.202134	0.208455	0.202597	0.208595		0.20624	0.212734	0.217815	0.199685	0.233299	0.226968	0.254304	0.245644	0.202273	0.211626	0.260631	0.259377	0.202299	0.230255	0.191054	0.195701	0.168312	0.194409	0.18068	0.166843	0.176844	0.1882	0.193153	0.189536
586	0.0775112	0.075363	0.0977652	0.0999793	0.0562406	0.05931	0.0918709	0.0866607	0.112703	0.10607	0.0860857	0.0918729	0.1757	0.174083	0.182356	0.171904	0.169023	0.173227	0.180973	0.174473	0.202363	0.208626	0.20282	0.20879		0.206352	0.21284	0.218017	0.199838	0.233412	0.227128	0.254842	0.246197	0.202713	0.212018	0.261098	0.259878	0.20234	0.230248	0.191133	0.195719	0.168364	0.194445	0.18081	0.167042	0.177018	0.188285	0.193284	0.189682
587	0.0777281	0.0755947	0.0979764	0.100177	0.0564367	0.0594715	0.0921045	0.0868669	0.112949	0.106301	0.0863985	0.0921879	0.175824	0.174202	0.182452	0.172061	0.169221	0.173391	0.18111	0.174657	0.202546	0.208752	0.203	0.208939		0.206425	0.212895	0.218168	0.199944	0.233475	0.227233	0.255332	0.246704	0.203111	0.212372	0.261521	0.260332	0.202342	0.2302	0.191158	0.195702	0.168378	0.194437	0.180902	0.167194	0.177149	0.188339	0.193375	0.189789
588	0.0778948	0.0757644	0.0981392	0.100319	0.0565844	0.0596039	0.0922841	0.0870243	0.113135	0.106478	0.0866516	0.0924451	0.175883	0.174272	0.182494	0.172157	0.169343	0.173501	0.181185	0.174787	0.202656	0.208806	0.203111	0.209015		0.206436	0.212873	0.218238	0.199977	0.23346	0.227255	0.255747	0.247136	0.203439	0.212658	0.261868	0.260708	0.20228	0.230088	0.191101	0.195629	0.168334	0.194361	0.180933	0.167271	0.177207	0.188342	0.1934	0.189833
589	0.0780729	0.0759356	0.0983206	0.100474	0.0567332	0.0597514	0.0924697	0.0871928	0.113321	0.106657	0.0868988	0.092703	0.175948	0.17435	0.182544	0.17226	0.169465	0.173625	0.18127	0.174938	0.202773	0.208865	0.203233	0.209097		0.206468	0.212858	0.218325	0.200028	0.233456	0.227284	0.256177	0.247588	0.203785	0.212958	0.262226	0.261092	0.202226	0.229969	0.191028	0.195559	0.168284	0.194275	0.18097	0.16735	0.177273	0.188367	0.193437	0.189891
590	0.0783253	0.0761761	0.0985872	0.100711	0.0569359	0.0599578	0.0927234	0.0874331	0.11357	0.106897	0.0872002	0.0930249	0.176095	0.174497	0.182667	0.172438	0.169668	0.17383	0.181441	0.175185	0.202983	0.209008	0.203454	0.209267		0.206603	0.212939	0.218528	0.20019	0.233554	0.227412	0.25672	0.248158	0.204241	0.213354	0.262684	0.261578	0.202254	0.229906	0.19101	0.195554	0.168285	0.194244	0.181085	0.167516	0.17743	0.188484	0.193567	0.190042
591	0.078635	0.0764701	0.0989194	0.101011	0.0571801	0.0602093	0.0930292	0.0877282	0.113867	0.107185	0.0875433	0.0933963	0.176304	0.174697	0.182846	0.172674	0.169934	0.174097	0.181677	0.175508	0.203265	0.209217	0.203749	0.209504		0.206816	0.213093	0.218818	0.200436	0.23373	0.227614	0.257351	0.248819	0.204783	0.213826	0.263221	0.262143	0.202344	0.229886	0.191036	0.195599	0.168326	0.194254	0.18126	0.167747	0.177656	0.188675	0.193768	0.190266
592	0.0789845	0.0768018	0.0992971	0.101354	0.057453	0.0604926	0.0933708	0.0880608	0.114198	0.107504	0.0879157	0.0938028	0.176556	0.174934	0.183063	0.17295	0.170242	0.174408	0.181958	0.175883	0.203596	0.209471	0.204096	0.209789		0.207083	0.213298	0.219169	0.20074	0.23396	0.227868	0.258045	0.249546	0.205387	0.214354	0.263814	0.262765	0.202479	0.229895	0.191091	0.195678	0.168395	0.194292	0.181478	0.168025	0.177932	0.188917	0.19402	0.190542
593	0.0793568	0.0771555	0.0997006	0.101722	0.057742	0.060794	0.0937321	0.0884139	0.114546	0.10784	0.0883049	0.0942298	0.176831	0.175191	0.183301	0.173248	0.170574	0.174742	0.182266	0.176287	0.203955	0.20975	0.204473	0.210101		0.207378	0.213532	0.219553	0.201075	0.234219	0.228148	0.258777	0.250313	0.206029	0.214918	0.264442	0.263422	0.202639	0.229919	0.191161	0.195776	0.16848	0.194346	0.181721	0.168328	0.178236	0.189189	0.194301	0.190848
594	0.0797346	0.0775154	0.10011	0.102095	0.0580346	0.0610999	0.0940968	0.0887703	0.114898	0.10818	0.0886984	0.0946628	0.177111	0.175454	0.183545	0.173551	0.17091	0.17508	0.182579	0.176699	0.20432	0.210035	0.204856	0.21042		0.207677	0.213772	0.219942	0.201415	0.234484	0.228432	0.259522	0.251092	0.206684	0.215497	0.265084	0.264091	0.202806	0.229946	0.191234	0.195878	0.168568	0.194401	0.181971	0.168637	0.178547	0.189471	0.194591	0.191164
595	0.0801006	0.0778658	0.100505	0.102456	0.0583182	0.0613969	0.0944487	0.0891127	0.115237	0.108506	0.0890837	0.095087	0.177375	0.175706	0.183777	0.17384	0.17123	0.175404	0.18288	0.177097	0.204671	0.210306	0.205224	0.210724		0.207956	0.213996	0.220308	0.201733	0.23473	0.228694	0.260253	0.251858	0.20733	0.216069	0.265716	0.264751	0.202961	0.229963	0.191295	0.195967	0.168648	0.194447	0.182211	0.168932	0.178844	0.189741	0.194869	0.191469
596	0.0804376	0.0781907	0.100867	0.102785	0.0585801	0.0616714	0.0947713	0.0894237	0.115548	0.108806	0.0894481	0.0954879	0.177604	0.175931	0.183979	0.174098	0.171514	0.175693	0.183146	0.177458	0.204984	0.210544	0.205554	0.210995		0.208189	0.214181	0.220624	0.202003	0.234934	0.228911	0.260947	0.252584	0.20794	0.216614	0.266317	0.265378	0.203084	0.229955	0.191331	0.196028	0.168708	0.194468	0.182423	0.169194	0.179106	0.189979	0.195113	0.191741
597	0.0807285	0.0784744	0.101175	0.103062	0.0588077	0.0619098	0.0950483	0.089686	0.115816	0.109064	0.0897791	0.0958506	0.177779	0.176112	0.184136	0.174307	0.171745	0.175928	0.18336	0.177759	0.205239	0.210727	0.205822	0.21121		0.208352	0.214305	0.220863	0.202198	0.23507	0.229058	0.261575	0.253243	0.208492	0.217112	0.266864	0.265949	0.203159	0.22991	0.191328	0.196047	0.168736	0.194453	0.18259	0.169402	0.179314	0.190162	0.195303	0.191959
598	0.080956	0.0787012	0.101409	0.10327	0.0589884	0.0620986	0.0952632	0.0898822	0.116026	0.109265	0.0900639	0.0961605	0.177881	0.176235	0.18423	0.174449	0.171901	0.17609	0.183501	0.177978	0.205413	0.210837	0.206007	0.211351		0.208421	0.214345	0.220995	0.202291	0.235114	0.229112	0.262114	0.253807	0.208959	0.217541	0.267335	0.266443	0.203165	0.229814	0.191273	0.196006	0.16872	0.194388	0.182694	0.169536	0.179445	0.190271	0.195417	0.192104
599	0.081176	0.0789124	0.101627	0.103458	0.0591504	0.0622793	0.0954705	0.0900654	0.116218	0.109449	0.0903372	0.0964632	0.177964	0.176362	0.184321	0.174581	0.172038	0.176247	0.183632	0.178198	0.20558	0.210933	0.206186	0.21148		0.208465	0.214364	0.221088	0.202353	0.235123	0.229129	0.262653	0.254369	0.209432	0.217981	0.267811	0.266941	0.203151	0.229708	0.191187	0.195957	0.168693	0.194298	0.182791	0.169649	0.179558	0.190381	0.195522	0.192256
600	0.0814458	0.0791535	0.10189	0.103678	0.0593266	0.0624956	0.0957251	0.0902907	0.116434	0.109657	0.0906366	0.0968062	0.178087	0.176554	0.184468	0.174762	0.172214	0.176463	0.18382	0.178499	0.205814	0.211075	0.206437	0.211661		0.208563	0.214429	0.221218	0.20246	0.23516	0.229177	0.263281	0.255022	0.210001	0.218509	0.26837	0.267523	0.203169	0.229636	0.191102	0.19595	0.168693	0.194216	0.182937	0.169802	0.179718	0.190568	0.195685	0.192495
601	0.0817494	0.079415	0.102183	0.103921	0.0595121	0.0627365	0.0960115	0.090544	0.116666	0.109881	0.0909534	0.0971768	0.178236	0.17679	0.184653	0.174977	0.172418	0.176721	0.184045	0.178855	0.206092	0.211249	0.206737	0.211879		0.208696	0.214525	0.221372	0.202597	0.235216	0.229244	0.263972	0.255738	0.210637	0.219101	0.268987	0.268164	0.20321	0.229586	0.191016	0.195971	0.16871	0.194138	0.183117	0.16998	0.179908	0.190809	0.195889	0.192794
602	0.0820712	0.0796874	0.102493	0.104176	0.0597017	0.0629912	0.0963143	0.090811	0.116905	0.110112	0.091279	0.0975625	0.178398	0.17705	0.184858	0.175208	0.172634	0.177	0.184291	0.179241	0.206395	0.21144	0.207063	0.212117		0.208847	0.214638	0.221537	0.20275	0.235281	0.229321	0.264699	0.25649	0.211312	0.21973	0.269639	0.26884	0.203262	0.229548	0.190929	0.196006	0.168734	0.194062	0.183316	0.170172	0.180114	0.191079	0.196116	0.193127
603	0.0823952	0.0799611	0.102805	0.104431	0.0598903	0.0632488	0.096618	0.0910777	0.117142	0.110341	0.0916049	0.0979505	0.178559	0.177314	0.185067	0.175439	0.172851	0.17728	0.184539	0.179632	0.206702	0.211633	0.207393	0.212357		0.208998	0.214751	0.221701	0.202903	0.235347	0.229398	0.265435	0.257253	0.211998	0.220371	0.2703	0.269524	0.203315	0.22951	0.19084	0.196042	0.168757	0.193985	0.183519	0.170365	0.180323	0.191355	0.196347	0.193468
604	0.0827059	0.0802267	0.103104	0.104676	0.060073	0.0634984	0.0969068	0.0913297	0.117368	0.11056	0.0919225	0.0983283	0.178705	0.177561	0.185261	0.175655	0.173054	0.177542	0.184771	0.180003	0.206991	0.211814	0.207704	0.212584		0.209131	0.214852	0.221853	0.203042	0.235403	0.229465	0.266152	0.257997	0.212667	0.220998	0.270944	0.270192	0.203358	0.229462	0.190749	0.196064	0.168768	0.193905	0.18371	0.170547	0.18052	0.191614	0.196566	0.19379
605	0.0829874	0.0804745	0.103378	0.1049	0.0602446	0.0637291	0.0971653	0.0915529	0.117574	0.110759	0.0922231	0.0986832	0.178824	0.177771	0.185422	0.175839	0.173232	0.177766	0.184969	0.180328	0.207242	0.211966	0.207973	0.212779		0.20923	0.214923	0.221979	0.203152	0.235441	0.229512	0.266823	0.258696	0.21329	0.221585	0.271546	0.270818	0.20338	0.229392	0.190655	0.196059	0.16876	0.193818	0.183873	0.170704	0.180689	0.191832	0.196755	0.194069
606	0.0832239	0.0806952	0.10361	0.105092	0.0604	0.0639301	0.0973777	0.0917328	0.117751	0.110929	0.092498	0.0990022	0.178902	0.177924	0.185533	0.175975	0.173369	0.177933	0.185115	0.180582	0.207434	0.212076	0.208178	0.212928		0.209276	0.214952	0.222068	0.203218	0.23545	0.22953	0.26742	0.259322	0.213839	0.222106	0.272082	0.271375	0.203371	0.22929	0.190557	0.196013	0.168722	0.193723	0.183995	0.170824	0.180817	0.191986	0.196895	0.194276
607	0.0833997	0.0808791	0.103788	0.10524	0.0605343	0.0640906	0.0975284	0.0918551	0.117889	0.111061	0.0927385	0.0992727	0.178924	0.177999	0.185577	0.176047	0.173453	0.178023	0.185192	0.18074	0.207546	0.212129	0.208295	0.213012		0.209252	0.214923	0.222106	0.203224	0.235422	0.229508	0.267916	0.259847	0.214285	0.222535	0.272524	0.271839	0.203319	0.229145	0.190455	0.195912	0.168646	0.193616	0.184058	0.170895	0.180889	0.192052	0.196969	0.194388
608	0.0835325	0.0810415	0.103929	0.105359	0.0606535	0.0642253	0.0976362	0.0919337	0.118002	0.111166	0.0929596	0.099514	0.178907	0.17802	0.185575	0.176071	0.173507	0.178058	0.185227	0.180837	0.207605	0.212147	0.208351	0.213057		0.209172	0.214856	0.22211	0.203188	0.235371	0.229459	0.268355	0.260318	0.214674	0.222921	0.272921	0.272256	0.20324	0.228967	0.190357	0.195768	0.16854	0.193507	0.18409	0.170937	0.180932	0.192067	0.197004	0.194436
609	0.0836513	0.0812036	0.104062	0.105469	0.0607675	0.0643564	0.0977307	0.0919924	0.118109	0.11126	0.0931814	0.0997534	0.178878	0.178027	0.185564	0.176077	0.173558	0.178073	0.185259	0.180924	0.207649	0.212162	0.20839	0.213099		0.209065	0.214782	0.222101	0.203137	0.235316	0.229403	0.268801	0.260796	0.21507	0.223327	0.273333	0.272687	0.203155	0.228775	0.190271	0.195605	0.168421	0.193408	0.184125	0.170976	0.18098	0.192082	0.197036	0.194473
610	0.0837569	0.0813644	0.104186	0.10557	0.0608767	0.0644841	0.097812	0.0920328	0.11821	0.111345	0.0934029	0.0999901	0.178835	0.17802	0.185544	0.176067	0.173606	0.178069	0.185285	0.181001	0.20768	0.212175	0.208412	0.213137		0.208933	0.214699	0.222079	0.203072	0.235257	0.229338	0.26925	0.26128	0.215471	0.223748	0.273757	0.27313	0.203066	0.228569	0.190194	0.195424	0.16829	0.193317	0.184161	0.171013	0.18103	0.192095	0.197065	0.194498
611	0.0838503	0.0815228	0.104302	0.105664	0.0609814	0.0646082	0.0978805	0.0920561	0.118303	0.11142	0.0936229	0.100223	0.178781	0.178	0.185513	0.17604	0.173648	0.178048	0.185306	0.181068	0.207698	0.212183	0.208418	0.21317		0.208779	0.214608	0.222046	0.202993	0.235192	0.229266	0.269698	0.261764	0.215872	0.224181	0.274187	0.273579	0.20297	0.228351	0.190124	0.195227	0.168148	0.193232	0.184196	0.171046	0.181081	0.192104	0.197089	0.194511
612	0.0839325	0.081678	0.10441	0.105749	0.0610818	0.0647291	0.0979363	0.0920637	0.118389	0.111486	0.0938404	0.100451	0.178715	0.177967	0.185473	0.175998	0.173685	0.178011	0.185319	0.181123	0.207702	0.212185	0.208408	0.213197		0.208605	0.214507	0.222001	0.202901	0.235121	0.229185	0.270143	0.262247	0.216271	0.22462	0.27462	0.274031	0.202869	0.228124	0.190058	0.195017	0.167997	0.19315	0.184229	0.171073	0.18113	0.192108	0.197108	0.194513
613	0.0840044	0.0818291	0.10451	0.105828	0.0611783	0.0648465	0.0979798	0.0920569	0.118468	0.111542	0.0940545	0.100674	0.178638	0.177922	0.185423	0.175944	0.173713	0.177959	0.185324	0.181166	0.207693	0.21218	0.208383	0.213216		0.208414	0.214396	0.221944	0.202798	0.235042	0.229096	0.270581	0.262724	0.216665	0.22506	0.275052	0.27448	0.202763	0.227887	0.189995	0.194795	0.167837	0.193069	0.184257	0.171094	0.181175	0.192105	0.197121	0.194503
614	0.0840669	0.0819751	0.104602	0.105899	0.0612711	0.0649608	0.0980112	0.0920371	0.118539	0.11159	0.094264	0.100891	0.17855	0.177867	0.185364	0.175877	0.173733	0.177893	0.185319	0.181196	0.207671	0.212167	0.208344	0.213227		0.208208	0.214274	0.221875	0.202683	0.234954	0.228998	0.271009	0.263193	0.21705	0.225497	0.275477	0.274924	0.20265	0.227642	0.189932	0.194562	0.167672	0.192989	0.184279	0.171107	0.181214	0.192093	0.197126	0.194481
615	0.0841209	0.0821151	0.104688	0.105964	0.0613607	0.0650718	0.0980308	0.0920056	0.118602	0.11163	0.0944678	0.1011	0.178452	0.177801	0.185295	0.175799	0.173741	0.177814	0.185303	0.181212	0.207637	0.212145	0.20829	0.213228		0.20799	0.214141	0.221795	0.202558	0.234857	0.228892	0.271424	0.263649	0.217424	0.225927	0.275893	0.275357	0.202531	0.227391	0.189866	0.194322	0.167501	0.192907	0.184292	0.171112	0.181244	0.192069	0.197122	0.194448
616	0.0841675	0.082248	0.104766	0.106022	0.0614472	0.0651797	0.0980387	0.0919638	0.118658	0.111661	0.094665	0.101301	0.178344	0.177726	0.185217	0.175711	0.173737	0.177724	0.185275	0.181213	0.207589	0.212112	0.208224	0.213218		0.207763	0.213995	0.221703	0.202422	0.234749	0.228776	0.271823	0.264089	0.217784	0.226344	0.276294	0.275775	0.202405	0.227134	0.189796	0.194076	0.167326	0.19282	0.184296	0.171107	0.181263	0.192032	0.197108	0.194402
617	0.0842074	0.0823731	0.104837	0.106075	0.0615311	0.0652845	0.0980352	0.091913	0.118704	0.111685	0.0948544	0.101493	0.178227	0.177642	0.185129	0.175615	0.173719	0.177624	0.185233	0.1812	0.207529	0.212067	0.208145	0.213196		0.207528	0.213837	0.221599	0.202278	0.234629	0.228652	0.272203	0.26451	0.218125	0.226743	0.276676	0.276174	0.202273	0.226874	0.189719	0.193826	0.167149	0.192728	0.184288	0.171091	0.181269	0.191981	0.197084	0.194344
618	0.0842418	0.0824893	0.104901	0.106122	0.0616125	0.0653863	0.0980207	0.0918547	0.118742	0.111701	0.0950351	0.101675	0.178101	0.177551	0.185032	0.175511	0.173685	0.177515	0.185177	0.18117	0.207457	0.21201	0.208054	0.213161		0.207289	0.213666	0.221485	0.202126	0.234496	0.228518	0.27256	0.264909	0.218446	0.22712	0.277035	0.27655	0.202135	0.226612	0.189633	0.193573	0.16697	0.192628	0.184266	0.171063	0.181259	0.191912	0.197047	0.194274
619	0.0842714	0.0825957	0.104959	0.106164	0.0616919	0.0654851	0.0979953	0.09179	0.118771	0.111711	0.0952059	0.101846	0.177968	0.177452	0.184925	0.175402	0.173635	0.177398	0.185105	0.181124	0.207372	0.211938	0.207951	0.213112		0.207048	0.21348	0.221359	0.201967	0.234349	0.228375	0.272891	0.265281	0.218743	0.22747	0.277366	0.276898	0.201989	0.226349	0.189535	0.193321	0.166792	0.192517	0.184228	0.171022	0.181232	0.191825	0.196998	0.194192
620	0.0842972	0.0826914	0.105011	0.106201	0.0617696	0.065581	0.0979594	0.0917205	0.11879	0.111713	0.0953658	0.102005	0.177826	0.177348	0.184809	0.175288	0.173567	0.177274	0.185016	0.18106	0.207275	0.211852	0.207838	0.213047		0.206807	0.21328	0.221222	0.2018	0.234187	0.228222	0.273192	0.265624	0.219012	0.227789	0.277665	0.277213	0.201836	0.226085	0.189423	0.19307	0.166616	0.192396	0.184172	0.170966	0.181184	0.191717	0.196935	0.194097
621	0.0843203	0.0827754	0.105056	0.106234	0.0618458	0.0656741	0.0979131	0.0916474	0.1188	0.111709	0.0955138	0.102151	0.177677	0.177237	0.184683	0.175171	0.173478	0.177145	0.184908	0.180978	0.207166	0.211748	0.207715	0.212966		0.20657	0.213065	0.221074	0.201628	0.234009	0.22806	0.273461	0.265933	0.219251	0.22807	0.277928	0.277493	0.201676	0.225824	0.189295	0.192822	0.166442	0.19226	0.184098	0.170895	0.181114	0.191587	0.196856	0.19399
622	0.0843414	0.0828469	0.105096	0.106263	0.0619209	0.0657644	0.0978567	0.0915722	0.118801	0.111698	0.0956487	0.102284	0.177522	0.177122	0.184548	0.175051	0.173369	0.177012	0.18478	0.180877	0.207045	0.211627	0.207582	0.212867		0.206338	0.212834	0.220916	0.201451	0.233814	0.227887	0.273695	0.266206	0.219457	0.228311	0.27815	0.277732	0.201509	0.225565	0.189149	0.192581	0.166273	0.192109	0.184002	0.170808	0.181019	0.191433	0.196762	0.193871
623	0.0843616	0.0829047	0.105129	0.106288	0.0619951	0.065852	0.0977906	0.091496	0.118791	0.111682	0.0957695	0.102402	0.17736	0.177003	0.184404	0.17493	0.173236	0.176876	0.184632	0.180757	0.206913	0.211487	0.20744	0.21275		0.206115	0.212586	0.220746	0.201269	0.233601	0.227704	0.273889	0.266439	0.219625	0.228505	0.278327	0.277925	0.201334	0.225311	0.188982	0.192346	0.166109	0.19194	0.183883	0.170703	0.180897	0.191252	0.19665	0.193739
624	0.0843817	0.0829481	0.105158	0.106309	0.0620688	0.065937	0.0977149	0.0914204	0.118771	0.11166	0.0958751	0.102505	0.177193	0.176881	0.184251	0.17481	0.17308	0.176739	0.184462	0.180616	0.206768	0.211327	0.20729	0.212612		0.205902	0.21232	0.220566	0.201084	0.233368	0.227511	0.274041	0.266628	0.219754	0.228647	0.278454	0.278069	0.201151	0.225062	0.188792	0.192122	0.165952	0.191751	0.183739	0.170579	0.180745	0.191043	0.19652	0.193595
625	0.0844028	0.082976	0.105181	0.106328	0.0621423	0.0660193	0.0976299	0.0913466	0.118741	0.111633	0.0959645	0.102592	0.17702	0.176756	0.184088	0.174691	0.172897	0.176601	0.184268	0.180454	0.206613	0.211146	0.207133	0.212454		0.205703	0.212037	0.220376	0.200895	0.233116	0.227308	0.274148	0.26677	0.21984	0.228734	0.278527	0.27816	0.20096	0.22482	0.188577	0.191908	0.165804	0.191542	0.183568	0.170435	0.180562	0.190804	0.19637	0.193437
626	0.0844375	0.0829968	0.105212	0.106358	0.0622369	0.0661215	0.0975188	0.0912624	0.118695	0.111603	0.0960411	0.102665	0.176841	0.176633	0.183915	0.174575	0.172675	0.176459	0.184045	0.180262	0.206447	0.210943	0.20697	0.212281		0.205523	0.211724	0.22017	0.200713	0.232835	0.227105	0.274215	0.266871	0.219884	0.228771	0.278555	0.278204	0.200783	0.224615	0.188343	0.19173	0.165693	0.191327	0.183367	0.170264	0.180339	0.190528	0.196206	0.193275
627	0.0844929	0.0830175	0.105259	0.106408	0.0623664	0.0662584	0.0973698	0.0911572	0.118631	0.111568	0.0961088	0.102729	0.176653	0.176512	0.183731	0.174461	0.172408	0.17631	0.18379	0.180036	0.206273	0.210721	0.206803	0.212102		0.205361	0.211374	0.219944	0.200541	0.232522	0.226911	0.27425	0.266939	0.219891	0.22877	0.278549	0.278217	0.200632	0.224467	0.188099	0.191599	0.165635	0.191122	0.183136	0.170063	0.180074	0.190213	0.196033	0.193112
628	0.0845611	0.0830358	0.105314	0.10647	0.0625198	0.0664182	0.0971902	0.0910347	0.11855	0.111529	0.0961672	0.102783	0.176457	0.176389	0.183535	0.174347	0.172102	0.176152	0.183509	0.17978	0.206089	0.21048	0.206629	0.211912		0.205211	0.210992	0.2197	0.200373	0.232182	0.226721	0.274257	0.266976	0.219866	0.228735	0.278513	0.278198	0.200499	0.224358	0.187844	0.1915	0.165615	0.190921	0.18288	0.169835	0.179775	0.189864	0.195849	0.192946
629	0.0846343	0.083049	0.105372	0.106537	0.0626861	0.0665896	0.0969877	0.0908986	0.118456	0.111485	0.096216	0.102827	0.176251	0.176262	0.183327	0.174229	0.171767	0.175986	0.183204	0.1795	0.205892	0.210223	0.206446	0.211712		0.205065	0.210587	0.219441	0.200204	0.231821	0.226527	0.274235	0.266985	0.219812	0.228669	0.278448	0.27815	0.200374	0.224271	0.187578	0.19142	0.165618	0.190719	0.182604	0.169587	0.179447	0.189488	0.195654	0.192772
630	0.0847048	0.0830546	0.105424	0.106601	0.0628545	0.066761	0.0967697	0.0907526	0.11835	0.111433	0.0962549	0.10286	0.176036	0.176127	0.183108	0.174104	0.171411	0.17581	0.182881	0.179199	0.205684	0.209951	0.206252	0.211497		0.204917	0.210165	0.219168	0.200027	0.231445	0.226326	0.274188	0.266967	0.219732	0.228576	0.278355	0.278075	0.200245	0.22419	0.187301	0.191345	0.165626	0.190508	0.18231	0.169323	0.179098	0.189089	0.195445	0.192587
631	0.0847648	0.0830501	0.105463	0.106655	0.063014	0.0669208	0.0965437	0.0906005	0.118235	0.111373	0.0962835	0.102881	0.17581	0.175981	0.182878	0.173971	0.171043	0.175623	0.182544	0.178882	0.205461	0.209664	0.206044	0.211267		0.204759	0.209732	0.218884	0.199836	0.231057	0.22611	0.274116	0.266924	0.219632	0.228461	0.278239	0.277975	0.200104	0.224096	0.187012	0.191258	0.165625	0.190284	0.182003	0.169048	0.178734	0.188675	0.195223	0.192386
632	0.0848065	0.0830329	0.105484	0.10669	0.0631536	0.0670574	0.0963171	0.090446	0.118114	0.111303	0.0963015	0.102891	0.175574	0.17582	0.182636	0.173825	0.170671	0.175426	0.182197	0.178554	0.205223	0.209366	0.205819	0.211018		0.204583	0.209296	0.21859	0.199626	0.230664	0.225875	0.274022	0.266859	0.219514	0.228327	0.278099	0.277851	0.199939	0.223975	0.186711	0.191147	0.165599	0.190041	0.181687	0.168766	0.178364	0.18825	0.194986	0.192166
633	0.084822	0.0830006	0.105478	0.1067	0.0632624	0.0671595	0.0960973	0.0902927	0.117988	0.111223	0.0963086	0.102888	0.175326	0.175642	0.182383	0.173663	0.170303	0.175216	0.181845	0.17822	0.204969	0.209056	0.205576	0.21075		0.204384	0.208862	0.21829	0.199391	0.230272	0.225614	0.273908	0.266772	0.219383	0.228177	0.277939	0.277706	0.199742	0.223807	0.186397	0.190997	0.165531	0.189773	0.181366	0.168484	0.177993	0.187821	0.194733	0.191924
634	0.0848037	0.0829506	0.105438	0.106676	0.0633295	0.0672153	0.0958919	0.0901444	0.117861	0.111131	0.0963045	0.102873	0.175066	0.175442	0.182119	0.173484	0.169948	0.174995	0.181492	0.177884	0.204697	0.208738	0.205313	0.210459		0.204153	0.208439	0.217984	0.199124	0.229884	0.225322	0.273775	0.266667	0.219243	0.228016	0.27776	0.277541	0.199502	0.223577	0.18607	0.190793	0.165405	0.189474	0.181044	0.168204	0.177628	0.187394	0.194463	0.191656
635	0.0847437	0.0828804	0.105359	0.106612	0.063344	0.0672134	0.0957083	0.0900047	0.117734	0.111026	0.0962888	0.102845	0.174794	0.175218	0.181844	0.173284	0.169615	0.17476	0.181142	0.17755	0.204405	0.208411	0.205026	0.210143		0.203884	0.208032	0.217674	0.19882	0.229508	0.224993	0.273625	0.266545	0.219096	0.227847	0.277565	0.277358	0.199208	0.223268	0.185731	0.19052	0.165207	0.189138	0.180726	0.167933	0.177277	0.186973	0.194174	0.191357
636	0.0846458	0.0827821	0.105236	0.106514	0.0633249	0.0671589	0.0955239	0.0898686	0.117602	0.110917	0.0962544	0.102796	0.1745	0.174971	0.181545	0.173067	0.169275	0.174503	0.180758	0.177179	0.204084	0.208057	0.204706	0.209787		0.203592	0.207626	0.217363	0.198482	0.229143	0.224626	0.273437	0.266386	0.218917	0.227636	0.277317	0.277124	0.198877	0.222909	0.18536	0.190207	0.16496	0.188751	0.180382	0.167646	0.176899	0.186513	0.193855	0.191017
637	0.0845217	0.0826535	0.105076	0.106398	0.0632979	0.0670695	0.0953151	0.089728	0.117459	0.110813	0.096197	0.102723	0.174181	0.174708	0.181217	0.172837	0.168902	0.174219	0.18031	0.176736	0.203727	0.207659	0.204351	0.209381		0.203295	0.207202	0.217048	0.198117	0.228784	0.224228	0.273193	0.266178	0.218683	0.227354	0.276989	0.276813	0.198531	0.222541	0.184949	0.189888	0.164698	0.188311	0.179989	0.16732	0.176461	0.185974	0.193497	0.190631
638	0.0843756	0.0825004	0.104888	0.106266	0.0632618	0.0669519	0.0950875	0.0895825	0.117306	0.110709	0.0961204	0.102629	0.17384	0.17443	0.180864	0.172595	0.168501	0.173912	0.179813	0.17624	0.203341	0.207228	0.203967	0.208935		0.202992	0.206762	0.216727	0.197731	0.228427	0.223805	0.272904	0.265926	0.218403	0.227016	0.276598	0.276442	0.19817	0.222161	0.184507	0.189561	0.164422	0.18783	0.179558	0.166964	0.175978	0.185378	0.193108	0.190209
639	0.0842116	0.082329	0.104677	0.106118	0.0632153	0.0668131	0.0948469	0.0894316	0.117144	0.110601	0.0960283	0.102518	0.173483	0.174137	0.180492	0.172342	0.168082	0.173588	0.179284	0.175709	0.202932	0.206773	0.20356	0.208462		0.202681	0.206311	0.2164	0.197328	0.228067	0.223364	0.272579	0.265641	0.21809	0.226637	0.276161	0.276025	0.197793	0.221768	0.184043	0.189224	0.164131	0.187321	0.179101	0.166588	0.175463	0.184742	0.192697	0.18976
640	0.084034	0.0821452	0.104451	0.105957	0.0631574	0.0666599	0.0945987	0.0892748	0.116972	0.110484	0.0959245	0.102395	0.173115	0.173831	0.180108	0.172077	0.167651	0.173252	0.178737	0.175158	0.202509	0.206303	0.203137	0.20797		0.202361	0.20585	0.216065	0.196912	0.2277	0.222911	0.272227	0.265329	0.217753	0.226231	0.275695	0.27558	0.1974	0.221361	0.183569	0.188872	0.163824	0.186798	0.178628	0.166201	0.174933	0.184088	0.19227	0.189293
641	0.0838469	0.081955	0.104217	0.105786	0.0630867	0.0664992	0.0943487	0.0891116	0.116792	0.110354	0.0958126	0.102262	0.17274	0.173514	0.179717	0.171803	0.167215	0.172909	0.17819	0.174607	0.202076	0.205828	0.202704	0.20747		0.202028	0.205384	0.21572	0.196489	0.22732	0.222454	0.271858	0.264998	0.217403	0.225812	0.275216	0.27512	0.196992	0.220938	0.183094	0.188505	0.163501	0.186273	0.178153	0.165811	0.174402	0.183433	0.191835	0.188817
642	0.0836545	0.0817643	0.103982	0.105605	0.063002	0.0663378	0.0941023	0.0889416	0.116605	0.110207	0.0956966	0.102125	0.172363	0.173186	0.179326	0.171518	0.166782	0.172564	0.177658	0.174072	0.201643	0.205358	0.202269	0.206974		0.201682	0.204914	0.215363	0.196061	0.226925	0.221999	0.271481	0.264658	0.217051	0.225397	0.274741	0.274661	0.196568	0.220497	0.182627	0.188118	0.163161	0.185759	0.177686	0.165428	0.173886	0.182798	0.1914	0.188341
643	0.0834608	0.0815791	0.103752	0.105416	0.0629022	0.0661827	0.0938652	0.0887642	0.116411	0.110038	0.0955801	0.101986	0.17199	0.172849	0.178939	0.171224	0.16636	0.172222	0.177156	0.17357	0.201214	0.204901	0.201836	0.206491		0.201321	0.204444	0.214994	0.195634	0.226508	0.221551	0.271105	0.264315	0.216707	0.224998	0.274287	0.27422	0.196127	0.220038	0.18218	0.18771	0.162803	0.185269	0.177238	0.16506	0.173398	0.182202	0.190973	0.187874
644	0.0832702	0.0814054	0.103536	0.105222	0.062786	0.0660407	0.093643	0.0885789	0.11621	0.109843	0.0954668	0.101849	0.171625	0.172504	0.178564	0.170921	0.165956	0.171888	0.176701	0.173119	0.200797	0.204468	0.201414	0.206032		0.200942	0.203977	0.21461	0.195213	0.226066	0.221119	0.27074	0.263978	0.216382	0.22463	0.27387	0.27381	0.19567	0.219559	0.181762	0.187277	0.162428	0.184816	0.176821	0.164717	0.172955	0.181665	0.190561	0.187425
645	0.0830521	0.0812158	0.103305	0.105005	0.0626317	0.065878	0.0934194	0.0883771	0.116002	0.109629	0.0953441	0.101697	0.171256	0.172135	0.178181	0.170602	0.165552	0.171547	0.176252	0.172673	0.200366	0.204033	0.200971	0.205558		0.200541	0.203503	0.214211	0.19477	0.225606	0.220662	0.270357	0.263616	0.216043	0.224254	0.273446	0.273389	0.195166	0.219018	0.181336	0.186794	0.162005	0.184347	0.176401	0.164381	0.172521	0.181139	0.190135	0.186955
646	0.0827819	0.0809851	0.103035	0.104749	0.0624262	0.0656648	0.0931777	0.0881537	0.115783	0.109404	0.0951995	0.101512	0.17087	0.171729	0.177772	0.170264	0.165129	0.171182	0.175766	0.172179	0.199894	0.203568	0.200482	0.205029		0.20012	0.20301	0.213798	0.194284	0.225138	0.220147	0.269924	0.263198	0.21566	0.223828	0.272967	0.272911	0.194593	0.218389	0.180864	0.186247	0.161517	0.183813	0.175942	0.164029	0.172057	0.18057	0.189665	0.186427
647	0.0824721	0.0807224	0.102734	0.104464	0.0621812	0.0654133	0.0929223	0.0879139	0.115555	0.109169	0.0950367	0.101302	0.170469	0.171295	0.177342	0.169909	0.164691	0.1708	0.175252	0.171651	0.19939	0.203079	0.199958	0.204458		0.19968	0.202503	0.213373	0.193764	0.224661	0.219588	0.269452	0.262735	0.21524	0.223362	0.272443	0.272386	0.193968	0.217693	0.180359	0.18565	0.160978	0.18323	0.175452	0.163663	0.17157	0.179969	0.189162	0.185854
648	0.0821354	0.0804369	0.102412	0.104157	0.0619081	0.0651363	0.0926577	0.0876631	0.115319	0.108924	0.0948595	0.101072	0.170057	0.170841	0.176898	0.169541	0.16424	0.170405	0.174719	0.1711	0.198863	0.202572	0.199407	0.203859		0.199228	0.201984	0.212936	0.193221	0.224175	0.219	0.268947	0.262237	0.214791	0.222864	0.271886	0.271826	0.193306	0.216953	0.17983	0.18502	0.160404	0.182614	0.17494	0.163288	0.171066	0.179346	0.188635	0.185251
649	0.0817845	0.0801378	0.102077	0.103837	0.0616188	0.064846	0.0923885	0.0874064	0.115075	0.108669	0.0946717	0.100829	0.169637	0.170375	0.176445	0.169164	0.16378	0.170002	0.174176	0.170538	0.198323	0.202055	0.198843	0.203242		0.198767	0.201456	0.21249	0.192666	0.223678	0.218396	0.268418	0.261713	0.214323	0.222344	0.271305	0.271241	0.192622	0.216188	0.179288	0.184371	0.159811	0.181983	0.174416	0.162905	0.170553	0.178712	0.188094	0.184632
650	0.081432	0.0798345	0.10174	0.103511	0.0613249	0.064555	0.0921192	0.087149	0.114824	0.108403	0.0944769	0.100581	0.169213	0.169905	0.175989	0.168781	0.163315	0.169597	0.173632	0.169977	0.197778	0.201532	0.198274	0.202621		0.198302	0.200921	0.212035	0.192108	0.223169	0.21779	0.267875	0.261175	0.213843	0.221811	0.270711	0.270644	0.191932	0.215422	0.178746	0.183718	0.159213	0.181352	0.17389	0.162519	0.170036	0.178079	0.187547	0.184009
651	0.0810906	0.079536	0.101408	0.103188	0.0610379	0.0642757	0.0918542	0.0868961	0.114568	0.108129	0.0942791	0.100332	0.168788	0.169439	0.175536	0.168396	0.162848	0.169194	0.173097	0.16943	0.197238	0.20101	0.197712	0.202009		0.197837	0.200384	0.211573	0.191557	0.222647	0.217197	0.267324	0.260631	0.21336	0.221276	0.270115	0.270044	0.19125	0.214674	0.178213	0.183078	0.158627	0.180739	0.173369	0.162132	0.169524	0.177456	0.187005	0.183396
652	0.0807729	0.0792515	0.101092	0.102875	0.0607696	0.0640207	0.091598	0.086653	0.114306	0.107844	0.0940819	0.10009	0.168365	0.168986	0.175092	0.168012	0.162383	0.168798	0.172578	0.168908	0.196711	0.200496	0.197168	0.201417		0.197375	0.199846	0.211104	0.191024	0.222112	0.216631	0.266774	0.260092	0.212882	0.220746	0.269527	0.269452	0.190593	0.213967	0.1777	0.182464	0.158067	0.180161	0.172864	0.161747	0.169023	0.176855	0.186477	0.182807
653	0.0804916	0.0789904	0.1008	0.102581	0.0605315	0.0638023	0.0913551	0.0864248	0.11404	0.10755	0.0938891	0.0998611	0.167948	0.168554	0.174664	0.167633	0.161923	0.168415	0.172085	0.168423	0.196206	0.199995	0.196651	0.200859		0.196923	0.19931	0.210632	0.19052	0.221562	0.216106	0.266233	0.259568	0.212417	0.220232	0.268957	0.26888	0.189974	0.213322	0.177219	0.181893	0.15755	0.179632	0.172383	0.161367	0.16854	0.176286	0.185972	0.182256
654	0.0802594	0.0787618	0.100542	0.102314	0.0603354	0.0636331	0.0911299	0.0862166	0.113771	0.107246	0.0937044	0.0996518	0.167539	0.168152	0.174255	0.167263	0.161471	0.168049	0.171627	0.167988	0.195733	0.199514	0.196173	0.200346		0.196483	0.19878	0.210156	0.190053	0.220997	0.215636	0.26571	0.259068	0.211974	0.219743	0.268415	0.268338	0.189411	0.21276	0.176781	0.181379	0.157091	0.179171	0.171936	0.160996	0.168081	0.17576	0.1855	0.181757
655	0.0800513	0.0785535	0.100291	0.102053	0.0601541	0.0634906	0.0909173	0.0860156	0.113484	0.106914	0.0935135	0.0994473	0.167134	0.167755	0.173851	0.166882	0.161013	0.167689	0.171198	0.167594	0.195285	0.199049	0.195722	0.199866		0.196036	0.198247	0.209655	0.189596	0.220385	0.2152	0.265182	0.258562	0.21154	0.219264	0.267889	0.267805	0.188866	0.212232	0.176371	0.180878	0.156651	0.178754	0.171513	0.160626	0.167634	0.175268	0.185047	0.181293
656	0.0798359	0.0783469	0.100018	0.101775	0.0599562	0.0633449	0.0907086	0.0858073	0.113172	0.106541	0.0933028	0.0992304	0.166725	0.167339	0.173432	0.166475	0.160535	0.167319	0.170781	0.16722	0.194847	0.19859	0.195275	0.199394		0.195565	0.197699	0.209113	0.189117	0.21971	0.214764	0.264625	0.25802	0.211096	0.218774	0.267357	0.267255	0.188297	0.21168	0.175966	0.180342	0.156189	0.178346	0.171099	0.160249	0.167182	0.174792	0.184595	0.180839
657	0.0796162	0.0781409	0.0997317	0.101484	0.0597465	0.0631975	0.090503	0.0855946	0.112839	0.106136	0.0930769	0.0990039	0.166313	0.166911	0.173002	0.166049	0.160042	0.166943	0.170374	0.166863	0.194414	0.198133	0.194831	0.198928		0.195074	0.197141	0.208539	0.188624	0.218989	0.214328	0.264044	0.257449	0.210642	0.218275	0.266819	0.266691	0.187711	0.211113	0.175565	0.179784	0.155711	0.177946	0.170691	0.159866	0.166727	0.174328	0.184141	0.180392
658	0.079395	0.0779345	0.099437	0.101185	0.0595298	0.0630498	0.0902999	0.0853802	0.112494	0.105712	0.0928409	0.0987705	0.165897	0.166475	0.172567	0.165611	0.15954	0.166563	0.169973	0.166516	0.193983	0.197676	0.194389	0.198465		0.194572	0.196576	0.207946	0.188122	0.218239	0.213894	0.263446	0.256858	0.21018	0.217766	0.266274	0.266115	0.187115	0.21054	0.175167	0.179214	0.155225	0.177552	0.170286	0.159479	0.16627	0.173871	0.183686	0.179949
659	0.0791755	0.0777269	0.0991407	0.100881	0.0593111	0.0629034	0.0900985	0.0851668	0.112142	0.105278	0.0925993	0.098533	0.165476	0.166037	0.17213	0.165167	0.159034	0.166181	0.169574	0.166174	0.19355	0.197216	0.193945	0.198		0.194066	0.196006	0.207345	0.187619	0.217476	0.213461	0.262836	0.256256	0.209711	0.21725	0.26572	0.265531	0.186517	0.209969	0.174771	0.178643	0.154739	0.177163	0.169881	0.15909	0.165813	0.173419	0.183228	0.179507
660	0.0789604	0.0775172	0.0988494	0.100579	0.0590954	0.0627595	0.0898981	0.0849572	0.111791	0.104845	0.092357	0.0982941	0.165053	0.165603	0.171696	0.164726	0.15853	0.165801	0.169174	0.165833	0.193111	0.196749	0.193498	0.197532		0.193561	0.195434	0.206745	0.187121	0.216718	0.21303	0.262219	0.255651	0.209234	0.216726	0.265157	0.26494	0.185923	0.209411	0.174376	0.178083	0.15426	0.176778	0.169474	0.158699	0.165358	0.172967	0.182768	0.179062
661	0.0787529	0.0773042	0.0985695	0.100281	0.0588873	0.0626197	0.0896979	0.0847542	0.111447	0.104422	0.0921188	0.0980564	0.164625	0.165179	0.17127	0.164293	0.158034	0.165424	0.168769	0.165487	0.192662	0.196274	0.193047	0.197057		0.193065	0.194863	0.206158	0.186636	0.215983	0.2126	0.261602	0.255051	0.208751	0.216196	0.264584	0.264346	0.18534	0.208872	0.173979	0.177545	0.153797	0.176394	0.169063	0.158308	0.164907	0.172511	0.182304	0.178613
662	0.0785558	0.0770872	0.0983076	0.0999925	0.058692	0.0624854	0.0894973	0.0845604	0.111117	0.104022	0.0918893	0.0978229	0.164194	0.164769	0.170854	0.163877	0.15755	0.165053	0.168356	0.16513	0.1922	0.195787	0.192589	0.196572		0.192585	0.194296	0.205596	0.186171	0.215286	0.212172	0.26099	0.254465	0.208262	0.215659	0.264001	0.263752	0.184776	0.208363	0.17358	0.177041	0.153355	0.176011	0.168644	0.157919	0.164461	0.172048	0.181835	0.178155
663	0.0783721	0.0768651	0.0980701	0.0997182	0.0585142	0.0623581	0.0892956	0.0843785	0.110807	0.103652	0.0916733	0.0975961	0.163758	0.16438	0.170455	0.163484	0.157086	0.164691	0.16793	0.164757	0.19172	0.195285	0.192122	0.196074		0.192127	0.193736	0.205068	0.185731	0.214647	0.211746	0.260389	0.253901	0.207768	0.215118	0.263405	0.263159	0.184238	0.207891	0.173177	0.176582	0.152944	0.175628	0.168215	0.157533	0.164022	0.171574	0.181362	0.177685
664	0.0781981	0.0766405	0.0978448	0.0994503	0.0583468	0.0622352	0.0890966	0.0842076	0.110506	0.103295	0.0914617	0.0973715	0.163319	0.164003	0.170065	0.163102	0.156631	0.164334	0.1675	0.164381	0.191231	0.194774	0.191652	0.195569		0.19168	0.193178	0.204555	0.185306	0.214032	0.211324	0.259787	0.253344	0.20727	0.214571	0.2628	0.262564	0.183714	0.207445	0.172774	0.176148	0.152551	0.175247	0.167783	0.157147	0.163587	0.171096	0.180886	0.177212
665	0.0780278	0.0764161	0.0976162	0.0991783	0.0581795	0.0621131	0.0889038	0.0840434	0.110196	0.102925	0.091243	0.0971429	0.162874	0.163625	0.169673	0.162712	0.156174	0.163976	0.167074	0.164015	0.190743	0.194261	0.191184	0.195065		0.191228	0.192615	0.204031	0.184879	0.213402	0.210905	0.259173	0.252774	0.206768	0.214016	0.262189	0.261961	0.183188	0.207005	0.172376	0.175715	0.152161	0.174874	0.167354	0.156756	0.163154	0.170626	0.18041	0.176743
666	0.0778604	0.0761911	0.0973853	0.0989027	0.0580118	0.0619917	0.0887154	0.0838843	0.109881	0.102545	0.0910183	0.0969107	0.162425	0.163248	0.16928	0.162316	0.155714	0.163616	0.166651	0.163656	0.190253	0.193745	0.190718	0.194561		0.190771	0.192047	0.203498	0.184451	0.212759	0.210489	0.258547	0.252194	0.206259	0.213455	0.261572	0.26135	0.18266	0.20657	0.17198	0.175282	0.151772	0.174506	0.166927	0.156361	0.162721	0.170161	0.179932	0.176275
667	0.0776952	0.075965	0.0971534	0.0986238	0.0578434	0.0618707	0.08853	0.0837285	0.109561	0.102156	0.0907889	0.096675	0.161972	0.16287	0.168887	0.161915	0.155253	0.163256	0.16623	0.163302	0.189761	0.193225	0.19025	0.194056		0.19031	0.191475	0.202958	0.184022	0.21211	0.210074	0.257911	0.251605	0.205745	0.212887	0.260947	0.260732	0.182131	0.206141	0.171587	0.174851	0.151386	0.174144	0.166501	0.155964	0.162289	0.1697	0.179451	0.175809
668	0.0775314	0.0757371	0.0969217	0.0983419	0.057674	0.0617499	0.0883458	0.0835742	0.109237	0.101762	0.0905561	0.0964363	0.161514	0.162491	0.168493	0.161512	0.154791	0.162894	0.165809	0.162951	0.189265	0.192701	0.18978	0.193548		0.189845	0.1909	0.202414	0.183594	0.211456	0.20966	0.257266	0.251008	0.205223	0.212311	0.260314	0.260107	0.181602	0.205717	0.171194	0.174423	0.151	0.173785	0.166075	0.155565	0.161859	0.169241	0.178968	0.17534
669	0.0773684	0.0755068	0.0966913	0.0980574	0.0575033	0.061629	0.0881614	0.0834199	0.108911	0.101365	0.0903211	0.0961948	0.161051	0.162111	0.168099	0.161107	0.15433	0.16253	0.165387	0.162599	0.188762	0.192171	0.189305	0.193036		0.189377	0.190322	0.201868	0.183167	0.210802	0.209245	0.256613	0.250405	0.204694	0.211729	0.259673	0.259474	0.181072	0.205296	0.170803	0.173997	0.150615	0.173429	0.165647	0.155165	0.16143	0.168783	0.178481	0.174868
670	0.0772053	0.0752734	0.0964634	0.0977708	0.0573308	0.0615079	0.0879749	0.0832636	0.108584	0.100967	0.0900851	0.0959507	0.160584	0.161729	0.167705	0.160702	0.153869	0.162164	0.164964	0.162245	0.188251	0.191634	0.188824	0.192519		0.188907	0.189743	0.201323	0.182741	0.210152	0.208828	0.255953	0.249798	0.204155	0.211139	0.259022	0.258836	0.180543	0.204878	0.17041	0.173576	0.150231	0.173075	0.165216	0.154765	0.161003	0.168324	0.17799	0.174391
671	0.0770414	0.0750363	0.0962393	0.0974822	0.0571564	0.0613864	0.087785	0.0831038	0.108258	0.100571	0.0898494	0.0957043	0.160113	0.161346	0.167312	0.160299	0.15341	0.161797	0.164538	0.161886	0.18773	0.191091	0.188334	0.191996		0.188434	0.189163	0.200781	0.182319	0.20951	0.208409	0.255288	0.249188	0.203606	0.210542	0.258361	0.258191	0.180014	0.204463	0.170016	0.17316	0.149846	0.172721	0.164781	0.154365	0.160578	0.167863	0.177494	0.173907
672	0.076876	0.0747949	0.0960201	0.0971922	0.0569796	0.0612641	0.0875899	0.0829387	0.107934	0.10018	0.0896151	0.0954561	0.159638	0.160961	0.16692	0.159899	0.152953	0.161426	0.164108	0.16152	0.187197	0.19054	0.187834	0.191465		0.187959	0.188582	0.200244	0.1819	0.208879	0.207986	0.254618	0.248576	0.203047	0.209937	0.257689	0.25754	0.179487	0.204051	0.16962	0.172749	0.149462	0.172367	0.164341	0.153967	0.160155	0.167398	0.176991	0.173413
673	0.0767084	0.0745484	0.095807	0.096901	0.0568001	0.0611409	0.087388	0.0827667	0.107613	0.0997945	0.0893836	0.0952061	0.159158	0.160574	0.166528	0.159503	0.152499	0.161054	0.163672	0.161143	0.186651	0.189979	0.187322	0.190926		0.187483	0.188002	0.199715	0.181486	0.208264	0.207557	0.253946	0.247964	0.202477	0.209326	0.257006	0.256884	0.178963	0.203639	0.169221	0.172344	0.149077	0.172012	0.163893	0.153572	0.159735	0.166928	0.176482	0.172909
674	0.0765369	0.0742977	0.0955948	0.0966055	0.0566155	0.0610141	0.0871823	0.0825895	0.107292	0.0994096	0.0891517	0.0949529	0.158673	0.160183	0.166136	0.159107	0.152047	0.160677	0.163234	0.160761	0.186093	0.189412	0.1868	0.190378		0.187001	0.187421	0.199187	0.181071	0.207655	0.207124	0.253268	0.247347	0.201896	0.208707	0.256314	0.256222	0.178435	0.203225	0.168819	0.17194	0.148687	0.171655	0.163442	0.153177	0.159316	0.166455	0.175967	0.172395
675	0.0763616	0.0740438	0.0953787	0.0963033	0.0564248	0.0608822	0.0869767	0.0824105	0.106967	0.0990178	0.0889157	0.0946953	0.158182	0.159785	0.16574	0.158705	0.151594	0.160296	0.162795	0.160378	0.185528	0.188839	0.186271	0.189826		0.18651	0.186837	0.198654	0.180651	0.207043	0.206687	0.25258	0.246722	0.201308	0.208082	0.255614	0.255552	0.177902	0.202807	0.168418	0.171529	0.148291	0.1713	0.16299	0.152781	0.158899	0.165984	0.175447	0.171876
676	0.0761838	0.073787	0.0951604	0.0959957	0.0562295	0.0607469	0.0867708	0.0822301	0.106637	0.0986203	0.0886763	0.0944337	0.157685	0.159383	0.165341	0.158298	0.151141	0.159911	0.162356	0.159996	0.184956	0.18826	0.185736	0.189269		0.186011	0.18625	0.198116	0.180229	0.206427	0.206247	0.251883	0.246088	0.200711	0.207451	0.254906	0.254876	0.177364	0.202387	0.168017	0.171116	0.147892	0.170946	0.162537	0.152384	0.158484	0.165514	0.174922	0.171352
677	0.0760051	0.0735276	0.0949418	0.0956841	0.0560312	0.0606099	0.0865646	0.0820488	0.106305	0.0982186	0.0884341	0.0941687	0.157183	0.158978	0.164942	0.157888	0.150688	0.159523	0.161916	0.159613	0.184377	0.187677	0.185196	0.188707		0.185508	0.185661	0.197575	0.179806	0.20581	0.205806	0.251178	0.245448	0.200107	0.206813	0.254189	0.254193	0.176825	0.201968	0.167617	0.170703	0.14749	0.170594	0.162082	0.151986	0.15807	0.165045	0.174393	0.170824
678	0.075827	0.0732658	0.0947246	0.09537	0.0558315	0.0604729	0.0863578	0.0818671	0.105971	0.0978138	0.0881898	0.093901	0.156677	0.158572	0.164542	0.157478	0.150234	0.159133	0.161476	0.15923	0.183792	0.187087	0.184651	0.188142		0.185	0.185069	0.197032	0.179384	0.205194	0.205364	0.250465	0.244802	0.199495	0.206167	0.253465	0.253503	0.176285	0.201552	0.167217	0.170293	0.147089	0.170245	0.161625	0.151587	0.157658	0.164577	0.173861	0.170292
679	0.0756511	0.0730018	0.0945106	0.0950547	0.0556319	0.0603378	0.0861503	0.0816853	0.105636	0.0974073	0.087944	0.0936311	0.156167	0.158166	0.164143	0.157067	0.149781	0.158742	0.161035	0.158847	0.183201	0.186493	0.184102	0.187573		0.184492	0.184475	0.196489	0.178965	0.204578	0.204922	0.249746	0.244151	0.198875	0.205515	0.252732	0.252807	0.175748	0.201143	0.166817	0.16989	0.146692	0.1699	0.161167	0.151188	0.157248	0.164109	0.173325	0.169758
680	0.0754787	0.0727359	0.0943017	0.0947395	0.0554341	0.0602062	0.085942	0.081504	0.1053	0.0970003	0.0876973	0.0933596	0.155654	0.157762	0.163747	0.156657	0.149329	0.158352	0.160593	0.158464	0.182604	0.185892	0.183549	0.187002		0.183984	0.183879	0.195947	0.178552	0.203966	0.204482	0.24902	0.243496	0.198247	0.204856	0.25199	0.252105	0.175214	0.200744	0.166419	0.169495	0.146299	0.169559	0.160706	0.150787	0.156839	0.163642	0.172787	0.169221
681	0.0753115	0.0724682	0.0940996	0.094426	0.0552395	0.0600799	0.0857326	0.0813236	0.104964	0.0965942	0.0874504	0.093087	0.155138	0.157361	0.163353	0.15625	0.148877	0.157962	0.16015	0.15808	0.182001	0.185287	0.182993	0.186428		0.183479	0.183281	0.195407	0.178145	0.203357	0.204045	0.24829	0.242839	0.197611	0.204189	0.251239	0.251397	0.174686	0.200356	0.16602	0.169112	0.145914	0.169223	0.160243	0.150387	0.156431	0.163174	0.172246	0.168683
682	0.0751508	0.0721992	0.093906	0.0941155	0.0550498	0.0599605	0.085522	0.0811445	0.104629	0.0961901	0.087204	0.0928139	0.15462	0.156965	0.162963	0.155848	0.148426	0.157575	0.159706	0.157696	0.181393	0.184675	0.182435	0.185852		0.182979	0.182682	0.194871	0.177748	0.202754	0.203612	0.247554	0.24218	0.196967	0.203515	0.250479	0.250683	0.174166	0.199983	0.165623	0.168745	0.145539	0.168894	0.159777	0.149986	0.156025	0.162706	0.171703	0.168143
683	0.0749954	0.0719283	0.0937195	0.0938067	0.0548635	0.0598464	0.0853103	0.0809664	0.104294	0.0957873	0.0869574	0.0925399	0.154099	0.156573	0.162577	0.155449	0.147976	0.157188	0.15926	0.157311	0.180779	0.184058	0.181873	0.185273		0.182482	0.18208	0.194336	0.177358	0.202156	0.20318	0.246814	0.241519	0.196316	0.202834	0.249709	0.249964	0.173651	0.199622	0.165226	0.168389	0.145171	0.168569	0.159308	0.149584	0.15562	0.162238	0.171157	0.167602
684	0.0748428	0.0716551	0.093537	0.0934975	0.0546781	0.0597344	0.0850978	0.0807888	0.103959	0.0953839	0.0867099	0.092264	0.153575	0.156183	0.162192	0.155051	0.147526	0.156802	0.158814	0.156926	0.18016	0.183436	0.181308	0.18469		0.181984	0.181477	0.193803	0.176972	0.201561	0.202749	0.246067	0.240854	0.195656	0.202146	0.248931	0.249239	0.17314	0.199269	0.164829	0.168042	0.144808	0.168247	0.158837	0.149182	0.155216	0.161769	0.170609	0.167058
685	0.0746929	0.0713797	0.0933586	0.0931878	0.0544935	0.0596247	0.0848845	0.0806115	0.103623	0.09498	0.0864614	0.0919864	0.153047	0.155793	0.161809	0.154655	0.147077	0.156415	0.158366	0.15654	0.179533	0.182807	0.180738	0.184104		0.181487	0.180871	0.19327	0.176589	0.200968	0.202318	0.245315	0.240185	0.194989	0.20145	0.248145	0.248509	0.172631	0.198923	0.164432	0.167702	0.144449	0.167928	0.158363	0.148779	0.154813	0.161301	0.170057	0.166512
686	0.0745458	0.0711019	0.0931841	0.0928774	0.0543096	0.0595171	0.0846704	0.0804346	0.103287	0.0945755	0.0862119	0.0917068	0.152515	0.155405	0.161427	0.154259	0.146628	0.156028	0.157917	0.156153	0.178901	0.182172	0.180165	0.183514		0.180989	0.180264	0.192737	0.176211	0.200377	0.201887	0.244556	0.239513	0.194315	0.200748	0.24735	0.247772	0.172125	0.198584	0.164034	0.16737	0.144094	0.167612	0.157887	0.148376	0.154412	0.160833	0.169501	0.165962
687	0.0744012	0.0708218	0.0930136	0.0925665	0.0541265	0.0594115	0.0844556	0.0802582	0.102949	0.0941703	0.0859613	0.0914254	0.15198	0.155018	0.161047	0.153865	0.14618	0.155641	0.157466	0.155766	0.178262	0.181532	0.179587	0.18292		0.180491	0.179655	0.192205	0.175836	0.19979	0.201456	0.243791	0.238836	0.193633	0.200039	0.246546	0.247029	0.171622	0.198254	0.163636	0.167046	0.143744	0.1673	0.157409	0.147972	0.154013	0.160364	0.168943	0.165409
688	0.0742593	0.0705394	0.0928469	0.0922549	0.053944	0.0593079	0.0842401	0.0800821	0.102612	0.0937645	0.0857097	0.0911422	0.151442	0.154632	0.160668	0.153471	0.145732	0.155253	0.157015	0.155377	0.177617	0.180886	0.179005	0.182323		0.179992	0.179043	0.191672	0.175465	0.199204	0.201025	0.24302	0.238155	0.192943	0.199324	0.245734	0.24628	0.171122	0.19793	0.163238	0.166729	0.143397	0.16699	0.156928	0.147567	0.153614	0.159896	0.168381	0.164854
689	0.0741199	0.0702547	0.092684	0.0919426	0.0537621	0.0592063	0.0840238	0.0799065	0.102273	0.0933579	0.085457	0.090857	0.1509	0.154247	0.160291	0.153079	0.145285	0.154865	0.156563	0.154989	0.176965	0.180234	0.178419	0.181722		0.179493	0.17843	0.19114	0.175098	0.198621	0.200594	0.242243	0.23747	0.192246	0.198601	0.244914	0.245525	0.170624	0.197614	0.16284	0.166419	0.143054	0.166684	0.156445	0.147161	0.153217	0.159428	0.167815	0.164296
690	0.0739831	0.0699676	0.0925247	0.0916295	0.0535808	0.0591065	0.0838069	0.0797312	0.101934	0.0929504	0.0852031	0.0905699	0.150354	0.153863	0.159915	0.152687	0.144838	0.154476	0.156109	0.154599	0.176307	0.179576	0.177829	0.181117		0.178994	0.177814	0.190609	0.174734	0.198041	0.200162	0.241461	0.236781	0.191541	0.197872	0.244086	0.244765	0.170128	0.197304	0.162442	0.166117	0.142715	0.16638	0.155959	0.146755	0.152821	0.15896	0.167246	0.163734
691	0.0738487	0.0696782	0.0923692	0.0913156	0.0534	0.0590086	0.0835893	0.0795564	0.101594	0.0925422	0.0849481	0.0902808	0.149804	0.153481	0.15954	0.152296	0.144392	0.154087	0.155654	0.15421	0.175643	0.178913	0.177235	0.180509		0.178494	0.177197	0.190077	0.174373	0.197463	0.199731	0.240672	0.236088	0.190829	0.197136	0.243249	0.243998	0.169635	0.197002	0.162044	0.165822	0.14238	0.16608	0.155472	0.146348	0.152427	0.158492	0.166674	0.16317
692	0.0737167	0.0693864	0.0922172	0.0910008	0.0532197	0.0589123	0.0833711	0.079382	0.101253	0.092133	0.084692	0.0899898	0.149251	0.153099	0.159167	0.151906	0.143946	0.153698	0.155198	0.153819	0.174973	0.178243	0.176636	0.179896		0.177993	0.176577	0.189545	0.174016	0.196887	0.199299	0.239877	0.235391	0.19011	0.196394	0.242404	0.243226	0.169144	0.196707	0.161645	0.165533	0.142049	0.165782	0.154982	0.14594	0.152034	0.158024	0.166099	0.162602
693	0.0735871	0.0690922	0.0920687	0.0906851	0.0530398	0.0588178	0.0831523	0.079208	0.100911	0.091723	0.0844346	0.0896968	0.148694	0.152718	0.158795	0.151517	0.1435	0.153308	0.154741	0.153428	0.174296	0.177568	0.176034	0.17928		0.177492	0.175955	0.189014	0.173662	0.196313	0.198868	0.239076	0.23469	0.189383	0.195645	0.241552	0.242448	0.168655	0.196419	0.161246	0.165252	0.141722	0.165487	0.154489	0.145531	0.151642	0.157556	0.16552	0.162032
694	0.0734598	0.0687957	0.0919236	0.0903685	0.0528602	0.0587249	0.0829328	0.0790344	0.100569	0.0913119	0.0841761	0.0894019	0.148133	0.152338	0.158424	0.151128	0.143055	0.152918	0.154283	0.153037	0.173613	0.176887	0.175427	0.17866		0.17699	0.175332	0.188482	0.173312	0.195742	0.198435	0.238269	0.233984	0.188649	0.19489	0.240691	0.241665	0.168169	0.196137	0.160847	0.164977	0.141397	0.165195	0.153995	0.145121	0.151252	0.157089	0.164937	0.161459
695	0.0733349	0.0684968	0.0917819	0.0900508	0.052681	0.0586335	0.0827128	0.0788613	0.100225	0.0908998	0.0839163	0.0891049	0.147569	0.151959	0.158055	0.15074	0.142611	0.152527	0.153824	0.152645	0.172923	0.1762	0.174815	0.178036		0.176487	0.174706	0.187951	0.172965	0.195172	0.198003	0.237456	0.233275	0.187908	0.194128	0.239822	0.240875	0.167685	0.195863	0.160448	0.16471	0.141077	0.164906	0.153498	0.144711	0.150863	0.156621	0.164352	0.160882
696	0.0732121	0.0681955	0.0916435	0.0897321	0.052502	0.0585437	0.0824922	0.0786886	0.099881	0.0904867	0.0836552	0.0888059	0.147	0.151581	0.157686	0.150353	0.142167	0.152136	0.153364	0.152252	0.172227	0.175508	0.1742	0.177409		0.175983	0.174078	0.187419	0.172621	0.194605	0.197571	0.236637	0.232561	0.187159	0.193359	0.238946	0.24008	0.167202	0.195595	0.160048	0.164448	0.14076	0.16462	0.152999	0.1443	0.150476	0.156154	0.163762	0.160303
697	0.0730916	0.0678918	0.0915084	0.0894123	0.0523232	0.0584552	0.0822711	0.0785163	0.0995358	0.0900724	0.0833929	0.0885049	0.146428	0.151203	0.157319	0.149966	0.141723	0.151744	0.152903	0.151859	0.171525	0.174809	0.17358	0.176777		0.175478	0.173447	0.186887	0.17228	0.19404	0.197138	0.235812	0.231843	0.186404	0.192584	0.238061	0.23928	0.166722	0.195333	0.159649	0.164194	0.140446	0.164337	0.152498	0.143888	0.15009	0.155687	0.16317	0.15972
698	0.0729731	0.0675857	0.0913764	0.0890913	0.0521446	0.0583682	0.0820495	0.0783444	0.0991896	0.0896569	0.0831293	0.0882019	0.145852	0.150826	0.156953	0.149579	0.14128	0.151352	0.152441	0.151465	0.170817	0.174105	0.172956	0.176142		0.174972	0.172815	0.186355	0.171942	0.193476	0.196705	0.234981	0.231121	0.185641	0.191803	0.237169	0.238473	0.166243	0.195078	0.159249	0.163946	0.140136	0.164056	0.151994	0.143476	0.149705	0.15522	0.162573	0.159135
699	0.0728568	0.0672772	0.0912476	0.0887691	0.0519661	0.0582824	0.0818273	0.078173	0.0988425	0.0892402	0.0828643	0.0878967	0.145272	0.15045	0.156588	0.149193	0.140837	0.150958	0.151977	0.151071	0.170102	0.173395	0.172328	0.175503		0.174465	0.172181	0.185823	0.171607	0.192915	0.196271	0.234144	0.230395	0.184872	0.191016	0.236269	0.237661	0.165767	0.194829	0.158849	0.163704	0.139829	0.163778	0.151488	0.143062	0.149322	0.154753	0.161974	0.158546
700	0.0727426	0.0669663	0.0911218	0.0884456	0.0517876	0.0581979	0.0816047	0.078002	0.0984944	0.0888223	0.082598	0.0875895	0.144689	0.150074	0.156224	0.148807	0.140395	0.150565	0.151513	0.150677	0.16938	0.172679	0.171696	0.17486		0.173957	0.171544	0.18529	0.171274	0.192355	0.195837	0.233301	0.229665	0.184095	0.190222	0.235362	0.236844	0.165292	0.194587	0.158449	0.163468	0.139525	0.163503	0.15098	0.142648	0.14894	0.154287	0.161371	0.157954
