# Supplementary material for: Structural color in Junonia butterflies evolves by tuning scale lamina thickness
Source: eLife. 2020 Apr 7;9:e52187. doi: 10.7554/eLife.52187 (PMC7138606; doi:10.7554/eLife.52187)
Supplement: Figure 8—source data 1. [file elife-52187-fig8-data1.xlsx]

## Sheet: SEM.ds.full
SpecimenID	Species	Scale	Thickness(nm)	ColorCluster	Hue-5color-toplot	WeightedAverageHue(nm)	MeanThickness(nm)
almana	almana	1	93.024	gold	0	616.383	102.497
almana	almana	1	99.8521	gold	0	616.383	102.497
almana	almana	1	100.056	gold	0	616.383	102.497
almana	almana	1	104.346	gold	0	616.383	102.497
almana	almana	2	93.8873	gold	0	616.383	102.497
almana	almana	2	93.9377	gold	0	616.383	102.497
almana	almana	2	97.4125	gold	0	616.383	102.497
almana	almana	2	106.328	gold	0	616.383	102.497
almana	almana	3	103.909	gold	0	616.383	102.497
almana	almana	3	104.559	gold	0	616.383	102.497
almana	almana	3	105.892	gold	0	616.383	102.497
almana	almana	3	98.473	gold	0	616.383	102.497
almana	almana	3	111.935	gold	0	616.383	102.497
almana	almana	3	112.161	gold	0	616.383	102.497
coenWT	coenia	1	95.0659	gold	0	602.936	100.479
coenWT	coenia	1	95.1339	gold	0	602.936	100.479
coenWT	coenia	1	95.4883	gold	0	602.936	100.479
coenWT	coenia	1	98.9143	gold	0	602.936	100.479
coenWT	coenia	1	102.036	gold	0	602.936	100.479
coenWT	coenia	1	102.634	gold	0	602.936	100.479
coenWT	coenia	1	104.05	gold	0	602.936	100.479
coenWT	coenia	1	113.131	gold	0	602.936	100.479
coenWT	coenia	2	96.9949	gold	0	602.936	100.479
coenWT	coenia	2	97.914	gold	0	602.936	100.479
coenWT	coenia	2	98.5657	gold	0	602.936	100.479
coenWT	coenia	2	100.732	gold	0	602.936	100.479
coenWT	coenia	2	104.289	gold	0	602.936	100.479
coenWT	coenia	2	104.289	gold	0	602.936	100.479
coenWT	coenia	3	91.6976	gold	0	602.936	100.479
coenWT	coenia	3	98.1324	gold	0	602.936	100.479
coenWT	coenia	3	102.529	gold	0	602.936	100.479
coenWT	coenia	3	107.032	gold	0	602.936	100.479
rhadF	rhadama	1	101.192	gold	0	622.798	109.407
rhadF	rhadama	1	107.519	gold	0	622.798	109.407
rhadF	rhadama	1	109.326	gold	0	622.798	109.407
rhadF	rhadama	1	110.163	gold	0	622.798	109.407
rhadF	rhadama	1	112.62	gold	0	622.798	109.407
rhadF	rhadama	1	115.502	gold	0	622.798	109.407
rhadF	rhadama	1	94.3321	gold	0	622.798	109.407
rhadF	rhadama	1	101.975	gold	0	622.798	109.407
rhadF	rhadama	1	105.781	gold	0	622.798	109.407
rhadF	rhadama	2	93.2579	gold	0	622.798	109.407
rhadF	rhadama	2	109.678	gold	0	622.798	109.407
rhadF	rhadama	2	118.03	gold	0	622.798	109.407
rhadF	rhadama	2	115.433	gold	0	622.798	109.407
rhadF	rhadama	2	117.535	gold	0	622.798	109.407
rhadF	rhadama	2	121.191	gold	0	622.798	109.407
rhadF	rhadama	3	100.64	gold	0	622.798	109.407
rhadF	rhadama	3	113.608	gold	0	622.798	109.407
rhadF	rhadama	3	115.565	gold	0	622.798	109.407
rhadF	rhadama	3	99.1594	gold	0	622.798	109.407
rhadF	rhadama	3	100.346	gold	0	622.798	109.407
rhadF	rhadama	3	109.569	gold	0	622.798	109.407
rhadF	rhadama	3	119.121	gold	0	622.798	109.407
westorange	westermanni	1	109.168	gold	0	618.633	111.066
westorange	westermanni	1	112.197	gold	0	618.633	111.066
westorange	westermanni	1	116.045	gold	0	618.633	111.066
westorange	westermanni	1	118.57	gold	0	618.633	111.066
westorange	westermanni	1	119.054	gold	0	618.633	111.066
westorange	westermanni	1	130.354	gold	0	618.633	111.066
westorange	westermanni	2	100.933	gold	0	618.633	111.066
westorange	westermanni	2	103.183	gold	0	618.633	111.066
westorange	westermanni	2	103.693	gold	0	618.633	111.066
westorange	westermanni	2	104.331	gold	0	618.633	111.066
westorange	westermanni	2	113.478	gold	0	618.633	111.066
westorange	westermanni	2	113.538	gold	0	618.633	111.066
westorange	westermanni	3	98.2313	gold	0	618.633	111.066
westorange	westermanni	3	100.924	gold	0	618.633	111.066
westorange	westermanni	3	102.909	gold	0	618.633	111.066
westorange	westermanni	3	104.872	gold	0	618.633	111.066
westorange	westermanni	3	109.837	gold	0	618.633	111.066
westorange	westermanni	3	111.808	gold	0	618.633	111.066
westorange	westermanni	3	100.694	gold	0	618.633	111.066
westorange	westermanni	3	104.261	gold	0	618.633	111.066
westorange	westermanni	3	109.483	gold	0	618.633	111.066
westorange	westermanni	3	114.636	gold	0	618.633	111.066
westorange	westermanni	4	108.054	gold	0	618.633	111.066
westorange	westermanni	4	108.721	gold	0	618.633	111.066
westorange	westermanni	4	113.405	gold	0	618.633	111.066
westorange	westermanni	4	119.135	gold	0	618.633	111.066
westorange	westermanni	4	128.072	gold	0	618.633	111.066
evarbrown	evarete	1	104.164	gold	0	608.293	112.374
evarbrown	evarete	1	112.746	gold	0	608.293	112.374
evarbrown	evarete	1	116.376	gold	0	608.293	112.374
evarbrown	evarete	1	122.386	gold	0	608.293	112.374
evarbrown	evarete	1	126.474	gold	0	608.293	112.374
evarbrown	evarete	1	126.985	gold	0	608.293	112.374
evarbrown	evarete	1	129.545	gold	0	608.293	112.374
evarbrown	evarete	1	133.635	gold	0	608.293	112.374
evarbrown	evarete	1	133.82	gold	0	608.293	112.374
evarbrown	evarete	2	98.6126	gold	0	608.293	112.374
evarbrown	evarete	2	104.624	gold	0	608.293	112.374
evarbrown	evarete	2	105.765	gold	0	608.293	112.374
evarbrown	evarete	3	107.242	gold	0	608.293	112.374
evarbrown	evarete	3	111.445	gold	0	608.293	112.374
evarbrown	evarete	3	112.619	gold	0	608.293	112.374
evarbrown	evarete	3	93.3825	gold	0	608.293	112.374
evarbrown	evarete	3	93.4554	gold	0	608.293	112.374
evarbrown	evarete	3	100.991	gold	0	608.293	112.374
evarbrown	evarete	3	111.533	gold	0	608.293	112.374
evarbrown	evarete	3	99.4511	gold	0	608.293	112.374
evarbrown	evarete	3	99.4871	gold	0	608.293	112.374
oritbrown	orithya	1	99.1571	gold	0	624.643	115.01
oritbrown	orithya	1	100.871	gold	0	624.643	115.01
oritbrown	orithya	1	104.514	gold	0	624.643	115.01
oritbrown	orithya	1	110.14	gold	0	624.643	115.01
oritbrown	orithya	2	105.399	gold	0	624.643	115.01
oritbrown	orithya	2	108.71	gold	0	624.643	115.01
oritbrown	orithya	2	109.362	gold	0	624.643	115.01
oritbrown	orithya	2	121.434	gold	0	624.643	115.01
oritbrown	orithya	2	125.287	gold	0	624.643	115.01
oritbrown	orithya	2	130.243	gold	0	624.643	115.01
oritbrown	orithya	3	104.922	gold	0	624.643	115.01
oritbrown	orithya	3	106.709	gold	0	624.643	115.01
oritbrown	orithya	3	108.317	gold	0	624.643	115.01
oritbrown	orithya	3	113.285	gold	0	624.643	115.01
oritbrown	orithya	3	125.153	gold	0	624.643	115.01
oritbrown	orithya	3	131.599	gold	0	624.643	115.01
oritbrown	orithya	3	133.184	gold	0	624.643	115.01
oritbrown	orithya	4	108.688	gold	0	624.643	115.01
oritbrown	orithya	4	109.458	gold	0	624.643	115.01
oritbrown	orithya	4	113.162	gold	0	624.643	115.01
oritbrown	orithya	4	116.642	gold	0	624.643	115.01
oritbrown	orithya	4	117.399	gold	0	624.643	115.01
oritbrown	orithya	4	124.665	gold	0	624.643	115.01
hieryellow	hierta	1	98.8858	gold	0	590.134	116.748
hieryellow	hierta	1	100.851	gold	0	590.134	116.748
hieryellow	hierta	1	103.108	gold	0	590.134	116.748
hieryellow	hierta	1	106.026	gold	0	590.134	116.748
hieryellow	hierta	2	88.6214	gold	0	590.134	116.748
hieryellow	hierta	2	104.197	gold	0	590.134	116.748
hieryellow	hierta	2	105.842	gold	0	590.134	116.748
hieryellow	hierta	2	109.675	gold	0	590.134	116.748
hieryellow	hierta	2	112.813	gold	0	590.134	116.748
hieryellow	hierta	2	115.007	gold	0	590.134	116.748
hieryellow	hierta	2	120.699	gold	0	590.134	116.748
hieryellow	hierta	2	125.104	gold	0	590.134	116.748
hieryellow	hierta	2	128.627	gold	0	590.134	116.748
hieryellow	hierta	3	110.219	gold	0	590.134	116.748
hieryellow	hierta	3	112.379	gold	0	590.134	116.748
hieryellow	hierta	3	116.543	gold	0	590.134	116.748
hieryellow	hierta	3	123.786	gold	0	590.134	116.748
hieryellow	hierta	3	126.662	gold	0	590.134	116.748
hieryellow	hierta	3	128.994	gold	0	590.134	116.748
hieryellow	hierta	3	121.583	gold	0	590.134	116.748
hieryellow	hierta	3	122.68	gold	0	590.134	116.748
hieryellow	hierta	3	123.404	gold	0	590.134	116.748
hieryellow	hierta	3	125.889	gold	0	590.134	116.748
hieryellow	hierta	3	132.153	gold	0	590.134	116.748
hieryellow	hierta	3	132.655	gold	0	590.134	116.748
hieryellow	hierta	4	116.046	gold	0	590.134	116.748
hieryellow	hierta	4	120.962	gold	0	590.134	116.748
hieryellow	hierta	4	125.217	gold	0	590.134	116.748
hieryellow	hierta	4	108.994	gold	0	590.134	116.748
hieryellow	hierta	4	111.083	gold	0	590.134	116.748
hieryellow	hierta	4	111.952	gold	0	590.134	116.748
hieryellow	hierta	4	118.277	gold	0	590.134	116.748
hieryellow	hierta	4	119.087	gold	0	590.134	116.748
octredband	octavia	1	133.827	red	1	585.338	134.578
octredband	octavia	1	135.787	red	1	585.338	134.578
octredband	octavia	1	137.429	red	1	585.338	134.578
octredband	octavia	1	153.483	red	1	585.338	134.578
octredband	octavia	2	137.493	red	1	585.338	134.578
octredband	octavia	2	139.461	red	1	585.338	134.578
octredband	octavia	2	139.872	red	1	585.338	134.578
octredband	octavia	2	150.321	red	1	585.338	134.578
octredband	octavia	2	120.378	red	1	585.338	134.578
octredband	octavia	2	121.842	red	1	585.338	134.578
octredband	octavia	2	121.986	red	1	585.338	134.578
octredband	octavia	2	124.345	red	1	585.338	134.578
octredband	octavia	3	126.14	red	1	585.338	134.578
octredband	octavia	3	129.667	red	1	585.338	134.578
oenF	oenone	1	138.423	red	1	593.333	147.374
oenF	oenone	1	150.915	red	1	593.333	147.374
oenF	oenone	1	132.338	red	1	593.333	147.374
oenF	oenone	1	135.14	red	1	593.333	147.374
oenF	oenone	1	145.618	red	1	593.333	147.374
oenF	oenone	2	144.958	red	1	593.333	147.374
oenF	oenone	2	148.394	red	1	593.333	147.374
oenF	oenone	2	150.171	red	1	593.333	147.374
oenF	oenone	2	151.968	red	1	593.333	147.374
oenF	oenone	3	143.362	red	1	593.333	147.374
oenF	oenone	3	147.412	red	1	593.333	147.374
oenF	oenone	3	168.462	red	1	593.333	147.374
atlites	atlites	1	149.065	NA	5	NA	163.778
atlites	atlites	1	150.905	NA	5	NA	163.778
atlites	atlites	1	152.013	NA	5	NA	163.778
atlites	atlites	2	169.342	NA	5	NA	163.778
atlites	atlites	2	171.263	NA	5	NA	163.778
atlites	atlites	2	176.498	NA	5	NA	163.778
atlites	atlites	2	180.337	NA	5	NA	163.778
atlites	atlites	2	183.593	NA	5	NA	163.778
atlites	atlites	2	199.606	NA	5	NA	163.778
atlites	atlites	2	201.291	NA	5	NA	163.778
atlites	atlites	2	203.049	NA	5	NA	163.778
atlites	atlites	2	205.015	NA	5	NA	163.778
atlites	atlites	3	159.893	NA	5	NA	163.778
atlites	atlites	3	161.536	NA	5	NA	163.778
atlites	atlites	3	169.049	NA	5	NA	163.778
atlites	atlites	3	181.651	NA	5	NA	163.778
atlites	atlites	3	185.182	NA	5	NA	163.778
atlites	atlites	3	190.63	NA	5	NA	163.778
atlites	atlites	3	129.19	NA	5	NA	163.778
atlites	atlites	3	130.985	NA	5	NA	163.778
atlites	atlites	3	139.612	NA	5	NA	163.778
atlites	atlites	3	138.318	NA	5	NA	163.778
atlites	atlites	3	143.416	NA	5	NA	163.778
atlites	atlites	3	159.548	NA	5	NA	163.778
atlites	atlites	3	161.818	NA	5	NA	163.778
atlites	atlites	4	143.841	NA	5	NA	163.778
atlites	atlites	4	144.038	NA	5	NA	163.778
atlites	atlites	4	154.114	NA	5	NA	163.778
atlites	atlites	4	159.841	NA	5	NA	163.778
atlites	atlites	4	142.026	NA	5	NA	163.778
atlites	atlites	4	142.069	NA	5	NA	163.778
atlites	atlites	4	143.899	NA	5	NA	163.778
atlites	atlites	4	147.447	NA	5	NA	163.778
oenM	oenone	1	153.666	indigo	2	489.056	173.649
oenM	oenone	1	158.724	indigo	2	489.056	173.649
oenM	oenone	1	161.421	indigo	2	489.056	173.649
oenM	oenone	1	169.043	indigo	2	489.056	173.649
oenM	oenone	2	182.568	indigo	2	489.056	173.649
oenM	oenone	2	185.031	indigo	2	489.056	173.649
oenM	oenone	2	187.577	indigo	2	489.056	173.649
oenM	oenone	3	164.849	indigo	2	489.056	173.649
oenM	oenone	3	168.635	indigo	2	489.056	173.649
oenM	oenone	3	168.753	indigo	2	489.056	173.649
oenM	oenone	3	171.209	indigo	2	489.056	173.649
oenM	oenone	3	172.497	indigo	2	489.056	173.649
oenM	oenone	3	172.512	indigo	2	489.056	173.649
oenM	oenone	3	175.142	indigo	2	489.056	173.649
oenM	oenone	3	176.787	indigo	2	489.056	173.649
oenM	oenone	3	177.616	indigo	2	489.056	173.649
oenM	oenone	3	187.105	indigo	2	489.056	173.649
rhadM	rhadama	1	176.884	indigo	2	493.828	179.409
rhadM	rhadama	1	176.928	indigo	2	493.828	179.409
rhadM	rhadama	1	180.227	indigo	2	493.828	179.409
rhadM	rhadama	1	172.997	indigo	2	493.828	179.409
rhadM	rhadama	1	176.302	indigo	2	493.828	179.409
rhadM	rhadama	1	206.816	indigo	2	493.828	179.409
rhadM	rhadama	1	218.404	indigo	2	493.828	179.409
rhadM	rhadama	2	165.998	indigo	2	493.828	179.409
rhadM	rhadama	2	168.569	indigo	2	493.828	179.409
rhadM	rhadama	2	168.63	indigo	2	493.828	179.409
rhadM	rhadama	3	183.602	indigo	2	493.828	179.409
rhadM	rhadama	3	185.383	indigo	2	493.828	179.409
rhadM	rhadama	3	187.132	indigo	2	493.828	179.409
rhadM	rhadama	3	194.164	indigo	2	493.828	179.409
rhadM	rhadama	3	157.865	indigo	2	493.828	179.409
rhadM	rhadama	3	159.275	indigo	2	493.828	179.409
rhadM	rhadama	3	161.253	indigo	2	493.828	179.409
rhadM	rhadama	3	170.965	indigo	2	493.828	179.409
rhadM	rhadama	3	175.176	indigo	2	493.828	179.409
rhadM	rhadama	3	178.638	indigo	2	493.828	179.409
hierM	hierta	1	166.689	indigo	2	493.72	182.812
hierM	hierta	1	175.449	indigo	2	493.72	182.812
hierM	hierta	1	176.796	indigo	2	493.72	182.812
hierM	hierta	1	176.796	indigo	2	493.72	182.812
hierM	hierta	1	177.609	indigo	2	493.72	182.812
hierM	hierta	1	181.969	indigo	2	493.72	182.812
hierM	hierta	2	166.079	indigo	2	493.72	182.812
hierM	hierta	2	169.683	indigo	2	493.72	182.812
hierM	hierta	2	172.899	indigo	2	493.72	182.812
hierM	hierta	2	176.323	indigo	2	493.72	182.812
hierM	hierta	3	200.313	indigo	2	493.72	182.812
hierM	hierta	3	203.006	indigo	2	493.72	182.812
hierM	hierta	3	204.563	indigo	2	493.72	182.812
hierM	hierta	3	181.635	indigo	2	493.72	182.812
hierM	hierta	3	182.977	indigo	2	493.72	182.812
hierM	hierta	3	193.484	indigo	2	493.72	182.812
coenAS	coenia	1	207.022	indigo	2	492.913	188.311
coenAS	coenia	1	208.502	indigo	2	492.913	188.311
coenAS	coenia	1	208.798	indigo	2	492.913	188.311
coenAS	coenia	1	185.166	indigo	2	492.913	188.311
coenAS	coenia	1	186.98	indigo	2	492.913	188.311
coenAS	coenia	1	190.64	indigo	2	492.913	188.311
coenAS	coenia	1	192.321	indigo	2	492.913	188.311
coenAS	coenia	1	203.002	indigo	2	492.913	188.311
coenAS	coenia	1	174.52	indigo	2	492.913	188.311
coenAS	coenia	1	176.263	indigo	2	492.913	188.311
coenAS	coenia	1	178.044	indigo	2	492.913	188.311
coenAS	coenia	1	179.825	indigo	2	492.913	188.311
coenAS	coenia	1	179.833	indigo	2	492.913	188.311
coenAS	coenia	1	180.142	indigo	2	492.913	188.311
coenAS	coenia	1	188.727	indigo	2	492.913	188.311
coenAS	coenia	1	164.274	indigo	2	492.913	188.311
coenAS	coenia	1	175.389	indigo	2	492.913	188.311
coenAS	coenia	1	184.11	indigo	2	492.913	188.311
coenAS	coenia	1	185.32	indigo	2	492.913	188.311
coenAS	coenia	2	178.083	indigo	2	492.913	188.311
coenAS	coenia	2	184.831	indigo	2	492.913	188.311
coenAS	coenia	2	185.301	indigo	2	492.913	188.311
coenAS	coenia	2	188.316	indigo	2	492.913	188.311
coenAS	coenia	2	193.767	indigo	2	492.913	188.311
coenAS	coenia	2	197.582	indigo	2	492.913	188.311
coenAS	coenia	3	198.001	indigo	2	492.913	188.311
coenAS	coenia	3	206.346	indigo	2	492.913	188.311
coenAS	coenia	3	209.298	indigo	2	492.913	188.311
coenAS	coenia	3	212.863	indigo	2	492.913	188.311
coenAS	coenia	3	159.256	indigo	2	492.913	188.311
coenAS	coenia	3	162.804	indigo	2	492.913	188.311
coenAS	coenia	3	173.537	indigo	2	492.913	188.311
coenAS	coenia	3	180.692	indigo	2	492.913	188.311
coenAS	coenia	3	182.01	indigo	2	492.913	188.311
coenAS	coenia	4	183.509	indigo	2	492.913	188.311
coenAS	coenia	4	184.731	indigo	2	492.913	188.311
coenAS	coenia	4	189.316	indigo	2	492.913	188.311
coenAS	coenia	4	190.875	indigo	2	492.913	188.311
oritM	orithya	1	200.458	indigo	2	489.941	189.724
oritM	orithya	1	203.153	indigo	2	489.941	189.724
oritM	orithya	1	206.076	indigo	2	489.941	189.724
oritM	orithya	1	179.029	indigo	2	489.941	189.724
oritM	orithya	1	179.233	indigo	2	489.941	189.724
oritM	orithya	1	182.452	indigo	2	489.941	189.724
oritM	orithya	1	187.13	indigo	2	489.941	189.724
oritM	orithya	1	188.48	indigo	2	489.941	189.724
oritM	orithya	1	189.676	indigo	2	489.941	189.724
oritM	orithya	2	193.539	indigo	2	489.941	189.724
oritM	orithya	2	195.887	indigo	2	489.941	189.724
oritM	orithya	2	196.046	indigo	2	489.941	189.724
oritM	orithya	2	196.046	indigo	2	489.941	189.724
oritM	orithya	2	199.976	indigo	2	489.941	189.724
oritM	orithya	2	200.008	indigo	2	489.941	189.724
oritM	orithya	3	181.133	indigo	2	489.941	189.724
oritM	orithya	3	185.326	indigo	2	489.941	189.724
oritM	orithya	3	188.379	indigo	2	489.941	189.724
oritM	orithya	3	189.523	indigo	2	489.941	189.724
oritM	orithya	3	190.115	indigo	2	489.941	189.724
oritM	orithya	3	185.198	indigo	2	489.941	189.724
oritM	orithya	3	186.739	indigo	2	489.941	189.724
oritM	orithya	3	189.181	indigo	2	489.941	189.724
oritM	orithya	3	190.047	indigo	2	489.941	189.724
oritM	orithya	1	199.892	indigo	2	489.941	189.724
oritM	orithya	1	207.943	indigo	2	489.941	189.724
oritM	orithya	1	208.431	indigo	2	489.941	189.724
oritM	orithya	4	181.269	indigo	2	489.941	189.724
oritM	orithya	4	181.508	indigo	2	489.941	189.724
oritM	orithya	4	184.462	indigo	2	489.941	189.724
oritM	orithya	4	184.785	indigo	2	489.941	189.724
oritM	orithya	4	188.91	indigo	2	489.941	189.724
oritM	orithya	4	195.672	indigo	2	489.941	189.724
oritM	orithya	5	162.897	indigo	2	489.941	189.724
oritM	orithya	5	169.096	indigo	2	489.941	189.724
oritM	orithya	5	173.293	indigo	2	489.941	189.724
oritM	orithya	5	176.439	indigo	2	489.941	189.724
oritM	orithya	5	177.207	indigo	2	489.941	189.724
oritM	orithya	5	177.207	indigo	2	489.941	189.724
evarblue	evarete	1	178.668	indigo	2	505.124	200.099
evarblue	evarete	1	182.5	indigo	2	505.124	200.099
evarblue	evarete	1	185.846	indigo	2	505.124	200.099
evarblue	evarete	1	191.689	indigo	2	505.124	200.099
evarblue	evarete	1	195.837	indigo	2	505.124	200.099
evarblue	evarete	2	185.242	indigo	2	505.124	200.099
evarblue	evarete	2	190.672	indigo	2	505.124	200.099
evarblue	evarete	2	195.94	indigo	2	505.124	200.099
evarblue	evarete	2	197.717	indigo	2	505.124	200.099
evarblue	evarete	2	201.079	indigo	2	505.124	200.099
evarblue	evarete	2	202.467	indigo	2	505.124	200.099
evarblue	evarete	3	178.404	indigo	2	505.124	200.099
evarblue	evarete	3	181.863	indigo	2	505.124	200.099
evarblue	evarete	3	185.284	indigo	2	505.124	200.099
evarblue	evarete	3	185.834	indigo	2	505.124	200.099
evarblue	evarete	3	186.103	indigo	2	505.124	200.099
evarblue	evarete	3	191.077	indigo	2	505.124	200.099
evarblue	evarete	3	194.19	indigo	2	505.124	200.099
evarblue	evarete	3	196.476	indigo	2	505.124	200.099
evarblue	evarete	3	197.739	indigo	2	505.124	200.099
evarblue	evarete	3	216.668	indigo	2	505.124	200.099
evarblue	evarete	3	217.931	indigo	2	505.124	200.099
evarblue	evarete	3	223.418	indigo	2	505.124	200.099
evarblue	evarete	3	226.715	indigo	2	505.124	200.099
evarblue	evarete	4	203.194	indigo	2	505.124	200.099
evarblue	evarete	4	207.202	indigo	2	505.124	200.099
evarblue	evarete	4	200.396	indigo	2	505.124	200.099
evarblue	evarete	4	203.082	indigo	2	505.124	200.099
evarblue	evarete	4	217.763	indigo	2	505.124	200.099
evarblue	evarete	4	220.576	indigo	2	505.124	200.099
evarblue	evarete	4	221.783	indigo	2	505.124	200.099
octDS	octavia	1	186.373	blue	3	491.38	210.296
octDS	octavia	1	191.748	blue	3	491.38	210.296
octDS	octavia	1	195.503	blue	3	491.38	210.296
octDS	octavia	2	212.974	blue	3	491.38	210.296
octDS	octavia	2	222.833	blue	3	491.38	210.296
octDS	octavia	2	223.399	blue	3	491.38	210.296
octDS	octavia	2	219.194	blue	3	491.38	210.296
octDS	octavia	2	220.397	blue	3	491.38	210.296
octDS	octavia	2	229.076	blue	3	491.38	210.296
octDS	octavia	3	228.152	blue	3	491.38	210.296
octDS	octavia	3	231.742	blue	3	491.38	210.296
octDS	octavia	3	234.259	blue	3	491.38	210.296
octDS	octavia	3	205.056	blue	3	491.38	210.296
octDS	octavia	3	209.944	blue	3	491.38	210.296
octDS	octavia	3	215.303	blue	3	491.38	210.296
octDS	octavia	4	180.006	blue	3	491.38	210.296
octDS	octavia	4	184.24	blue	3	491.38	210.296
octDS	octavia	4	184.924	blue	3	491.38	210.296
octDS	octavia	4	194.92	blue	3	491.38	210.296
westblue	westermanni	1	207.943	blue	3	515.674	213.474
westblue	westermanni	1	223.535	blue	3	515.674	213.474
westblue	westermanni	1	226.306	blue	3	515.674	213.474
westblue	westermanni	2	210.351	blue	3	515.674	213.474
westblue	westermanni	2	214.275	blue	3	515.674	213.474
westblue	westermanni	2	215.393	blue	3	515.674	213.474
westblue	westermanni	2	215.877	blue	3	515.674	213.474
westblue	westermanni	2	216.254	blue	3	515.674	213.474
westblue	westermanni	2	216.344	blue	3	515.674	213.474
westblue	westermanni	3	194.594	blue	3	515.674	213.474
westblue	westermanni	3	202.106	blue	3	515.674	213.474
westblue	westermanni	3	202.302	blue	3	515.674	213.474
coenmKO	coenia	1	210.177	blue	3	533.699	213.686
coenmKO	coenia	1	211.412	blue	3	533.699	213.686
coenmKO	coenia	1	215.023	blue	3	533.699	213.686
coenmKO	coenia	1	227.015	blue	3	533.699	213.686
coenmKO	coenia	1	231.668	blue	3	533.699	213.686
coenmKO	coenia	1	198.167	blue	3	533.699	213.686
coenmKO	coenia	1	199.796	blue	3	533.699	213.686
coenmKO	coenia	1	203.448	blue	3	533.699	213.686
coenmKO	coenia	1	222.202	blue	3	533.699	213.686
coenmKO	coenia	2	210.072	blue	3	533.699	213.686
coenmKO	coenia	2	213.751	blue	3	533.699	213.686
coenmKO	coenia	2	224.33	blue	3	533.699	213.686
coenmKO	coenia	2	224.377	blue	3	533.699	213.686
coenmKO	coenia	3	193.412	blue	3	533.699	213.686
coenmKO	coenia	3	195.489	blue	3	533.699	213.686
coenmKO	coenia	3	204.532	blue	3	533.699	213.686
coenmKO	coenia	3	218.482	blue	3	533.699	213.686
coenmKO	coenia	3	222.236	blue	3	533.699	213.686
coenmKO	coenia	3	225.815	blue	3	533.699	213.686
coenmKO	coenia	3	202.71	blue	3	533.699	213.686
coenmKO	coenia	3	207.05	blue	3	533.699	213.686
coenmKO	coenia	3	217.602	blue	3	533.699	213.686
coenmKO	coenia	3	229.549	blue	3	533.699	213.686
coenmKO	coenia	4	202.487	blue	3	533.699	213.686
coenmKO	coenia	4	202.793	blue	3	533.699	213.686
coenmKO	coenia	4	203.786	blue	3	533.699	213.686
coenmKO	coenia	4	203.8	blue	3	533.699	213.686
coenmKO	coenia	4	212.173	blue	3	533.699	213.686
coenmKO	coenia	4	213.473	blue	3	533.699	213.686
coenmKO	coenia	4	222.691	blue	3	533.699	213.686
oritFteal	orithya	1	212.383	blue	3	541.796	219.151
oritFteal	orithya	1	215.854	blue	3	541.796	219.151
oritFteal	orithya	1	219.433	blue	3	541.796	219.151
oritFteal	orithya	2	206.122	blue	3	541.796	219.151
oritFteal	orithya	2	212.747	blue	3	541.796	219.151
oritFteal	orithya	2	215.522	blue	3	541.796	219.151
oritFteal	orithya	2	212.177	blue	3	541.796	219.151
oritFteal	orithya	2	218.433	blue	3	541.796	219.151
oritFteal	orithya	2	218.433	blue	3	541.796	219.151
oritFteal	orithya	2	219.946	blue	3	541.796	219.151
oritFteal	orithya	3	211.224	blue	3	541.796	219.151
oritFteal	orithya	3	214.948	blue	3	541.796	219.151
oritFteal	orithya	3	223.568	blue	3	541.796	219.151
oritFteal	orithya	3	223.568	blue	3	541.796	219.151
oritFteal	orithya	3	223.139	blue	3	541.796	219.151
oritFteal	orithya	3	224.867	blue	3	541.796	219.151
oritFteal	orithya	3	229.349	blue	3	541.796	219.151
octWS	octavia	1	211.532	green	4	561.187	229.104
octWS	octavia	1	213.621	green	4	561.187	229.104
octWS	octavia	1	218.012	green	4	561.187	229.104
octWS	octavia	1	223.533	green	4	561.187	229.104
octWS	octavia	1	217.031	green	4	561.187	229.104
octWS	octavia	1	221.553	green	4	561.187	229.104
octWS	octavia	1	224.817	green	4	561.187	229.104
octWS	octavia	1	227.72	green	4	561.187	229.104
octWS	octavia	1	239.875	green	4	561.187	229.104
octWS	octavia	2	193.769	green	4	561.187	229.104
octWS	octavia	2	195.994	green	4	561.187	229.104
octWS	octavia	3	243.715	green	4	561.187	229.104
octWS	octavia	3	246.193	green	4	561.187	229.104
octWS	octavia	3	248.901	green	4	561.187	229.104
octWS	octavia	3	254.843	green	4	561.187	229.104
octWS	octavia	3	261.079	green	4	561.187	229.104
evargreen	evarete	1	222.745	green	4	559.307	233.874
evargreen	evarete	1	225.693	green	4	559.307	233.874
evargreen	evarete	1	226.547	green	4	559.307	233.874
evargreen	evarete	1	226.925	green	4	559.307	233.874
evargreen	evarete	1	231.696	green	4	559.307	233.874
evargreen	evarete	1	234.206	green	4	559.307	233.874
evargreen	evarete	1	237.761	green	4	559.307	233.874
evargreen	evarete	2	233.84	green	4	559.307	233.874
evargreen	evarete	2	242.9	green	4	559.307	233.874
evargreen	evarete	2	245.308	green	4	559.307	233.874
evargreen	evarete	2	203.177	green	4	559.307	233.874
evargreen	evarete	2	206.864	green	4	559.307	233.874
evargreen	evarete	2	220.438	green	4	559.307	233.874
evargreen	evarete	2	223.038	green	4	559.307	233.874
evargreen	evarete	2	226.206	green	4	559.307	233.874
evargreen	evarete	3	246.391	green	4	559.307	233.874
evargreen	evarete	3	250.676	green	4	559.307	233.874
evargreen	evarete	3	254.802	green	4	559.307	233.874
evargreen	evarete	3	256.571	green	4	559.307	233.874
evargreen	evarete	3	256.781	green	4	559.307	233.874
evargreen	evarete	4	218.454	green	4	559.307	233.874
evargreen	evarete	4	221.267	green	4	559.307	233.874
