# Supplementary material for: Structural color in Junonia butterflies evolves by tuning scale lamina thickness
Source: eLife. 2020 Apr 7;9:e52187. doi: 10.7554/eLife.52187 (PMC7138606; doi:10.7554/eLife.52187)
Supplement: Figure 8—source data 2. [file elife-52187-fig8-data2.xlsx]

## Sheet: Sheet2
wl	coenia_CA_s1_1	coenia_CA_s1_2	coenia_CA_s2_1	coenia_CA_s2_2	coenia_CA_s3_1	coenia_CA_s3_2	almana_s1_1	almana_s1_2	almana_s2_1	almana_s2_2	almana_s3_1	almana_s3_2	evarete_brown_s1_1	evarete_brown_s1_2	evarete_brown_s2_1	evarete_brown_s2_2	evarete_brown_s3_1	evarete_brown_s3_2	orithya_Fbrown_s1_1	orithya_Fbrown_s1_2	orithya_Fbrown_s2_1	orithya_Fbrown_s2_2	orithya_Fbrown_s3_1	orithya_Fbrown_s3_2	rhadama_Fbrown_s1_1	rhadama_Fbrown_s1_2	rhadama_Fbrown_s2_1	rhadama_Fbrown_s2_2	rhadama_Fbrown_s3_1	rhadama_Fbrown_s3_2	westermanni_orange_s1_1	westermanni_orange_s1_2	westermanni_orange_s2_1	westermanni_orange_s2_2	westermanni_orange_s3_1	westermanni_orange_s3_2	hierta_yellow_s1_1	hierta_yellow_s1_2	hierta_yellow_s2_1	hierta_yellow_s2_2	hierta_yellow_s3_1	hierta_yellow_s3_2		octavia_redband_s1_1	octavia_redband_s1_2	octavia_redband_s2_1	octavia_redband_s2_2	octavia_redband_s3_1	octavia_redband_s3_2
400	0	0	0.014942	0.0125432	0	0	0.408113	0.531272	0.201808	0.0432865	0.256684	0.110005	0.118489	0	0	0	0	0.00622415	0.722397	0.346676	1.56476	1.46801	1.72132	1.71131	2.53355	1.95855	0.47277	0.124746	0.185157	0.269622	0.629292	0.350992	0.715532	0.768318	0.592404	1.45267	0	0	0.0484899	0	0	0		6.35986	5.65989	4.00781	3.75824	3.51282	5.45614
401	0.00827796	0.0204182	0.0100197	0.00804189	0.0133377	0.0351386	0.372111	0.483521	0.177886	0.0335478	0.227036	0.0940777	0.1001	0.00251688	0.0264475	0.0332819	0.0119666	0.00303857	0.677395	0.321159	1.49862	1.39732	1.64939	1.63816	2.45958	1.88588	0.452242	0.111586	0.163308	0.245171	0.585205	0.309367	0.658088	0.711852	0.548429	1.38197	0.00484184	0.041182	0.0357592	0.0227583	0.0159315	0.00513713		6.30546	5.62172	3.98716	3.7561	3.4904	5.44251
402	0.0177018	0.0418369	0.00601137	0.00447299	0.027677	0.0708626	0.337525	0.437693	0.155224	0.024961	0.199002	0.0792794	0.0829778	0.0058569	0.0536652	0.0673751	0.0246924	0.000946566	0.633659	0.296557	1.43383	1.32821	1.57889	1.56651	2.38673	1.81454	0.432129	0.0991479	0.142603	0.221775	0.542581	0.270054	0.602837	0.657363	0.506002	1.313	0.011043	0.0833121	0.0248375	0.0468205	0.0328347	0.011484		6.2507	5.58297	3.96602	3.75311	3.46761	5.42804
403	0.0283787	0.0643321	0.00296995	0.00190043	0.043125	0.107235	0.304436	0.393897	0.133905	0.0175684	0.172651	0.0656489	0.0672187	0.0100505	0.0817329	0.102359	0.0382022	0	0.591251	0.272888	1.37041	1.26074	1.50985	1.49639	2.31496	1.74452	0.412445	0.0874355	0.123117	0.199468	0.501467	0.233158	0.549848	0.604911	0.465173	1.24579	0.0186847	0.126435	0.0158	0.0722325	0.0507542	0.0191038		6.19552	5.54354	3.94432	3.74916	3.44439	5.41267
404	0.0404161	0.0879794	0.000948487	0.000388122	0.059789	0.14432	0.272926	0.352241	0.114011	0.0114123	0.14805	0.0532251	0.0529193	0.0151282	0.110731	0.138313	0.0525206	0.000250712	0.550233	0.250171	1.3084	1.19496	1.44232	1.42785	2.24426	1.67585	0.393202	0.0764514	0.104922	0.178285	0.461911	0.198779	0.499188	0.554553	0.425991	1.18034	0.0278485	0.170594	0.00872209	0.0990408	0.0697345	0.0280597		6.13982	5.5033	3.92202	3.74415	3.42065	5.39631
405	0.0539213	0.112855	0	0	0.0777763	0.18218	0.243078	0.312832	0.0956248	0.00653508	0.125267	0.0420466	0.0401763	0.0211204	0.140739	0.175317	0.0676724	0.00175054	0.510667	0.228425	1.24782	1.13094	1.37632	1.36091	2.17461	1.60854	0.374412	0.0661982	0.0880913	0.158264	0.42396	0.167022	0.450925	0.506348	0.388505	1.11665	0.0386156	0.215834	0.00367921	0.127291	0.0898201	0.0384149		6.08352	5.46213	3.89904	3.73801	3.39632	5.37891
406	0.0690014	0.139034	0.000177514	0.000799984	0.097194	0.220879	0.214973	0.275778	0.0788279	0.00297905	0.104371	0.0321524	0.029086	0.0280576	0.171837	0.21345	0.0836823	0.00455134	0.472616	0.207668	1.18871	1.06872	1.31191	1.29561	2.10599	1.54258	0.356088	0.0566789	0.0726991	0.139438	0.387661	0.137989	0.405127	0.460356	0.352764	1.05473	0.0510675	0.2622	0.00074672	0.157031	0.111056	0.0502325		6.02655	5.41991	3.87533	3.73062	3.37133	5.36039
407	0.0857639	0.166593	0.00153405	0.002852	0.118149	0.26048	0.188692	0.241188	0.063703	0.00078658	0.0854305	0.0235811	0.0197451	0.0359703	0.204105	0.252792	0.100575	0.00870495	0.436141	0.187919	1.13108	1.00837	1.2491	1.23197	2.03838	1.478	0.338242	0.047896	0.0588185	0.121843	0.353061	0.111783	0.361861	0.416635	0.318818	0.99459	0.0652853	0.309735	0	0.188305	0.133485	0.0635758		5.9688	5.37652	3.85083	3.72189	3.34558	5.34068
408	0.104316	0.195607	0.00412263	0.00621996	0.14075	0.301046	0.164318	0.209169	0.0503325	0	0.0685124	0.0163714	0.0122501	0.0448889	0.237624	0.293422	0.118375	0.0142632	0.401304	0.169197	1.07497	0.949943	1.18796	1.17004	1.97176	1.4148	0.320888	0.0398525	0.0465227	0.105514	0.320209	0.0885073	0.321195	0.375242	0.286715	0.936234	0.0813507	0.358484	0.00151443	0.221159	0.157154	0.078508		5.91021	5.33183	3.82548	3.71172	3.31902	5.31972
409	0.124765	0.226153	0.00799627	0.0109678	0.165102	0.342642	0.141934	0.179829	0.0387987	0.000661657	0.0536853	0.0105622	0.00669756	0.0548439	0.272473	0.335419	0.137107	0.021278	0.368168	0.15152	1.02041	0.8935	1.1285	1.10983	1.9061	1.353	0.304037	0.032551	0.0358852	0.0904872	0.289151	0.0682641	0.283196	0.336238	0.256505	0.879671	0.0993448	0.408491	0.00536539	0.255642	0.182106	0.0950921		5.85068	5.28573	3.79921	3.70002	3.29155	5.29743
410	0.146909	0.258086	0.0130438	0.0169697	0.191003	0.385127	0.121397	0.15297	0.0289444	0.00268175	0.040818	0.00608331	0.0029309	0.0657964	0.308532	0.378656	0.156733	0.029681	0.336626	0.134845	0.967333	0.83894	1.07067	1.05131	1.84146	1.2926	0.287681	0.0259929	0.0267928	0.0767042	0.259816	0.0508704	0.247756	0.299517	0.228101	0.824892	0.11912	0.459678	0.0114143	0.291673	0.208271	0.113213		5.79038	5.23845	3.77215	3.68698	3.26332	5.27394
411	0.170464	0.291203	0.0191173	0.0240522	0.218166	0.428322	0.102499	0.128307	0.020549	0.00594107	0.0297279	0.00283445	0.000708662	0.0776776	0.345608	0.422938	0.17719	0.0393537	0.306521	0.119114	0.915678	0.786116	1.01438	0.994377	1.77787	1.2336	0.271798	0.020176	0.0190667	0.064077	0.232089	0.0360599	0.214708	0.264928	0.201376	0.771884	0.140465	0.51193	0.019463	0.329138	0.235539	0.132706		5.72953	5.19028	3.74446	3.67284	3.23451	5.24942
412	0.195413	0.325494	0.0262148	0.0322076	0.246574	0.472224	0.0852193	0.10582	0.0135994	0.0104378	0.0204059	0.000808914	0	0.0904722	0.383672	0.468238	0.198471	0.0502726	0.277836	0.104333	0.865437	0.735015	0.959615	0.939033	1.71536	1.17598	0.256378	0.0150977	0.012682	0.0525954	0.205954	0.0238111	0.184032	0.232459	0.176319	0.720645	0.163364	0.565241	0.0294979	0.368026	0.263897	0.153561		5.66813	5.14127	3.71615	3.65764	3.20516	5.22389
413	0.221738	0.360948	0.034334	0.041428	0.27621	0.516831	0.0695369	0.0854869	0.00808261	0.0161703	0.012843	0	0.00077407	0.104166	0.422693	0.514532	0.220567	0.062414	0.250556	0.0905028	0.816604	0.685621	0.906367	0.885266	1.65391	1.11973	0.241409	0.0107556	0.00761341	0.042249	0.181395	0.0141022	0.155709	0.202099	0.15292	0.671171	0.187802	0.619604	0.0415053	0.408327	0.293332	0.175765		5.6062	5.09143	3.68722	3.64137	3.17527	5.19737
414	0.249422	0.397555	0.0434729	0.0517059	0.307059	0.562143	0.0554308	0.0672868	0.00398578	0.0231367	0.00702997	0.000401023	0.00300003	0.118743	0.46264	0.561795	0.243471	0.0757543	0.224668	0.0776279	0.769175	0.637921	0.854624	0.833068	1.59354	1.06484	0.226883	0.00714723	0.00383601	0.0330276	0.158396	0.00691186	0.12972	0.173838	0.131169	0.623459	0.213763	0.67501	0.0554714	0.450029	0.32383	0.199308		5.54376	5.04079	3.65768	3.62407	3.14488	5.16986
415	0.278448	0.435303	0.0536294	0.0630333	0.339103	0.608157	0.0428803	0.0511987	0.0012959	0.0313352	0.00295786	0.00200529	0.00664702	0.134188	0.503485	0.610002	0.267174	0.09027	0.200155	0.0657112	0.723146	0.5919	0.804376	0.782431	1.53426	1.01128	0.212788	0.00426996	0.00132468	0.0249209	0.136941	0.00221831	0.106047	0.147663	0.111055	0.577506	0.241233	0.731454	0.0713825	0.493123	0.355377	0.224179		5.48083	4.98937	3.62754	3.60573	3.114	5.1414
416	0.308798	0.474181	0.0648015	0.0754028	0.372326	0.654871	0.0318646	0.0372015	0	0.0407641	0.000617556	0.00480612	0.0116842	0.150488	0.545196	0.659129	0.291668	0.105937	0.177002	0.0547557	0.678513	0.547543	0.755611	0.733345	1.47606	0.959037	0.199115	0.00212133	5.43692e-05	0.0179187	0.117013	0	0.0846706	0.123564	0.0925679	0.533309	0.270197	0.788927	0.089225	0.537597	0.387962	0.250367		5.4174	4.93718	3.59681	3.58638	3.08264	5.11198
417	0.340456	0.514179	0.0769869	0.0888064	0.406711	0.702285	0.0223627	0.0252742	8.51184e-05	0.0514216	0	0.00879682	0.0180808	0.167626	0.587745	0.70915	0.316946	0.122733	0.155195	0.0447646	0.63527	0.504837	0.70832	0.685803	1.41895	0.908102	0.185853	0.00069885	0	0.0120107	0.0985973	0.000235332	0.0655712	0.101529	0.0756966	0.490865	0.300638	0.847423	0.108985	0.583441	0.421569	0.277861		5.35351	4.88427	3.5655	3.56603	3.05083	5.08163
418	0.373402	0.555286	0.0901837	0.103237	0.442241	0.750396	0.0143538	0.0153956	0.00153829	0.0633059	0.00109611	0.0139707	0.0258058	0.185588	0.631099	0.760041	0.342998	0.140633	0.134718	0.035741	0.593413	0.463766	0.662492	0.639796	1.36294	0.858458	0.172992	0	0.00113651	0.00718664	0.0816769	0.00290271	0.0487301	0.0815463	0.060431	0.450171	0.332543	0.906934	0.130649	0.630645	0.456185	0.306649		5.28916	4.83064	3.5336	3.5447	3.0186	5.05036
419	0.407945	0.597724	0.10455	0.11887	0.479216	0.799371	0.00805063	0.00785038	0.00457937	0.0765365	0.00409434	0.0204411	0.035103	0.204455	0.675467	0.812016	0.369897	0.159783	0.115744	0.0277581	0.55302	0.42449	0.618236	0.595409	1.308	0.810148	0.160568	5.01352e-05	0.00366407	0.00354511	0.0663818	0.00829086	0.0343517	0.06379	0.0469059	0.411252	0.366148	0.967613	0.154429	0.67936	0.491938	0.336922		5.22412	4.77598	3.50096	3.52213	2.98573	5.01799
420	0.444307	0.641658	0.120197	0.135835	0.517857	0.849325	0.00361858	0.0028532	0.00937087	0.0911964	0.00913165	0.0282913	0.0461696	0.224298	0.72102	0.865247	0.397698	0.180303	0.0984061	0.0208627	0.514147	0.387131	0.575639	0.552708	1.25409	0.76322	0.148616	0.000869097	0.00774403	0.00116358	0.0528161	0.0166177	0.022594	0.0483889	0.0352233	0.374129	0.401632	1.02957	0.180485	0.729703	0.528925	0.368818		5.15822	4.72004	3.46745	3.49813	2.95207	4.98435
421	0.482352	0.686984	0.137049	0.15405	0.558027	0.900178	0.000965686	0.000278328	0.0158139	0.10723	0.0161217	0.0374701	0.0589048	0.245087	0.767673	0.919643	0.426374	0.202139	0.082628	0.0150184	0.47676	0.351619	0.534652	0.511658	1.20124	0.717659	0.137125	0.00244611	0.0132931	0	0.0409251	0.0277553	0.0133684	0.0352652	0.0253234	0.33879	0.438887	1.09274	0.20872	0.781604	0.567093	0.402254		5.09156	4.66297	3.43315	3.47283	2.91772	4.94954
422	0.521942	0.733603	0.155031	0.173435	0.599593	0.951852	0	0	0.0238094	0.12458	0.0249783	0.047926	0.0732081	0.266789	0.815344	0.975114	0.455894	0.225233	0.0683347	0.0101892	0.440824	0.317886	0.495228	0.472221	1.14945	0.673451	0.126082	0.0047704	0.0202278	1.232e-05	0.0306544	0.0415758	0.00658656	0.0243413	0.017146	0.305224	0.477807	1.15704	0.239041	0.834996	0.606387	0.437143		5.02425	4.6049	3.39814	3.44633	2.88275	4.91365
423	0.562939	0.781412	0.174067	0.193908	0.642419	1.00427	0.000629583	0.00189245	0.0332585	0.143192	0.0356151	0.0596075	0.0889786	0.289375	0.86395	1.03157	0.486231	0.249528	0.0554509	0.00633875	0.406305	0.285863	0.457319	0.434361	1.09875	0.630583	0.115474	0.00783118	0.028465	0.00115855	0.0219494	0.0579513	0.00215992	0.0155395	0.0106313	0.273421	0.518286	1.22242	0.271351	0.889813	0.646754	0.4734		4.95639	4.54599	3.36249	3.41875	2.84725	4.87675
424	0.605205	0.830311	0.194083	0.215388	0.68637	1.05735	0.0027625	0.00582991	0.0440623	0.163009	0.0479457	0.0724632	0.106116	0.312813	0.913406	1.08892	0.517353	0.274967	0.0439011	0.00343083	0.373167	0.255481	0.420878	0.398041	1.04912	0.58904	0.10529	0.0116177	0.0379212	0.00339659	0.0147555	0.076754	0	0.00878222	0.00571937	0.243369	0.560216	1.2888	0.305556	0.945986	0.68814	0.51094		4.88809	4.48638	3.32628	3.3902	2.81131	4.83894
425	0.648603	0.880198	0.215003	0.237794	0.73131	1.11101	0.0063068	0.0116866	0.0561217	0.183975	0.0618839	0.0864417	0.124519	0.337072	0.96363	1.14708	0.549234	0.301495	0.03361	0.00142922	0.341376	0.226671	0.385856	0.363225	1.0006	0.548808	0.0955169	0.0161192	0.0485132	0.00668442	0.00901819	0.097856	1.832e-05	0.00399163	0.00235012	0.215057	0.603491	1.35611	0.341561	1.00345	0.73049	0.549676		4.81945	4.42621	3.28958	3.3608	2.77501	4.80029
426	0.692994	0.930971	0.236753	0.261045	0.777106	1.16519	0.0111706	0.0193368	0.069338	0.206033	0.0773435	0.101492	0.144087	0.362122	1.01454	1.20595	0.581843	0.329054	0.0245021	0.000297683	0.310897	0.199364	0.352206	0.329875	0.953188	0.509874	0.0861435	0.0213248	0.0601576	0.01098	0.00468286	0.121129	0.00212639	0.00109012	0.000463657	0.188475	0.648005	1.42428	0.379271	1.06213	0.77375	0.589524		4.75057	4.36562	3.25248	3.33066	2.73845	4.7609
427	0.738242	0.982529	0.259257	0.285061	0.823622	1.21978	0.0172618	0.0286547	0.083612	0.229129	0.094238	0.117561	0.16472	0.387931	1.06605	1.26544	0.615152	0.357587	0.0165021	0	0.281695	0.173492	0.319879	0.297957	0.906898	0.472223	0.0771571	0.0272238	0.0727711	0.0162413	0.00169498	0.146446	0.00623572	0	0	0.16361	0.69365	1.49324	0.41859	1.12197	0.817867	0.630399		4.68156	4.30476	3.21504	3.29989	2.7017	4.72085
428	0.784208	1.03477	0.282439	0.309759	0.870723	1.27473	0.0244886	0.0395145	0.0988449	0.253206	0.112481	0.1346	0.186317	0.414469	1.11808	1.32547	0.649131	0.387038	0.00953453	0.000499938	0.253736	0.148985	0.28883	0.267432	0.861741	0.435841	0.0685456	0.0338055	0.0862703	0.0224262	0	0.173679	0.0122578	0.000643586	0.000899192	0.140452	0.74032	1.56293	0.459425	1.18289	0.862786	0.672214		4.61252	4.24377	3.17735	3.26862	2.66486	4.68022
429	0.832152	1.08863	0.307019	0.335933	0.919693	1.33095	0.0336856	0.0531759	0.11603	0.278863	0.132887	0.153012	0.20988	0.442001	1.17138	1.38682	0.684083	0.417847	0.00424538	0.0021208	0.227363	0.126441	0.259405	0.238643	0.817453	0.400609	0.0603349	0.0410711	0.101333	0.0298951	7.44e-07	0.203949	0.0208448	0.00366229	0.00366568	0.119007	0.788918	1.63383	0.502657	1.2454	0.908916	0.71568		4.54248	4.18127	3.13864	3.23569	2.62713	4.63829
430	0.883078	1.14483	0.333562	0.364209	0.971549	1.38914	0.0455192	0.0706294	0.135947	0.306564	0.156098	0.173128	0.2362	0.470743	1.22658	1.45014	0.720245	0.450377	0.00115507	0.00511986	0.202846	0.10634	0.231893	0.211862	0.773842	0.366463	0.0525573	0.0490338	0.11851	0.0389386	0.00203093	0.238156	0.0325363	0.00957545	0.00870691	0.0992921	0.840175	1.70634	0.548991	1.30989	0.956593	0.761372		4.47064	4.11616	3.09832	3.20021	2.58789	4.59448
431	0.936463	1.203	0.361767	0.394252	1.02576	1.44891	0.0596459	0.0913463	0.158178	0.336056	0.181777	0.194784	0.264859	0.500587	1.28336	1.5151	0.757491	0.484455	0	0.00936186	0.180042	0.0884365	0.206158	0.186948	0.731029	0.333474	0.0452105	0.0577	0.137531	0.0494102	0.00593232	0.27584	0.0470748	0.0181223	0.0158174	0.0813116	0.89372	1.78027	0.598059	1.37618	1.00566	0.809001		4.39741	4.04903	3.0567	3.16266	2.54746	4.54907
432	0.991786	1.26275	0.391334	0.425731	1.08178	1.50986	0.0757219	0.114797	0.182306	0.367081	0.209584	0.217818	0.29544	0.531428	1.3414	1.58137	0.795693	0.519907	0.000516582	0.0147116	0.158806	0.0724878	0.182063	0.163759	0.689134	0.301712	0.0382918	0.0670765	0.158124	0.0611634	0.0115467	0.31654	0.0642029	0.0290421	0.0247916	0.0650698	0.949183	1.85543	0.649494	1.44407	1.05594	0.858276		4.32321	3.98045	3.01412	3.12352	2.50616	4.50237
433	1.04852	1.3237	0.421961	0.458312	1.13907	1.57159	0.0934035	0.140454	0.207912	0.399385	0.23918	0.242064	0.327527	0.56316	1.40039	1.64864	0.834724	0.556559	0.00244122	0.0210337	0.138993	0.0582495	0.159469	0.142154	0.648277	0.271246	0.0317989	0.0771699	0.180017	0.0740518	0.0187158	0.359797	0.0836634	0.042074	0.0354241	0.0505709	1.0062	1.93164	0.702928	1.51336	1.10729	0.908909		4.24845	3.911	2.97088	3.08327	2.46432	4.45468
434	1.10615	1.38545	0.453346	0.491662	1.19711	1.63371	0.112347	0.167787	0.23458	0.432712	0.270224	0.26736	0.360703	0.595675	1.46003	1.71658	0.874457	0.594237	0.00551032	0.028193	0.120459	0.0454777	0.138241	0.121989	0.608579	0.242146	0.0257294	0.087987	0.20294	0.0879289	0.0272814	0.405149	0.105199	0.0569572	0.0475094	0.0378193	1.06439	2.00869	0.757996	1.58386	1.15954	0.960609		4.17354	3.84125	2.9273	3.04239	2.42227	4.40628
435	1.16415	1.44763	0.48519	0.525449	1.25536	1.69582	0.132209	0.196268	0.26189	0.466805	0.302377	0.293542	0.394551	0.628868	1.52	1.78486	0.914764	0.632768	0.00946029	0.0360542	0.103059	0.0339283	0.11824	0.103125	0.57016	0.214483	0.0200807	0.0995342	0.226621	0.102648	0.0370852	0.452138	0.128552	0.0734311	0.0608419	0.0268191	1.1234	2.0864	0.814329	1.65536	1.21253	1.01309		4.09889	3.77178	2.88371	3.00136	2.38033	4.35747
436	1.222	1.50986	0.51719	0.55934	1.31328	1.75752	0.152645	0.225367	0.289426	0.50141	0.335301	0.320445	0.428653	0.662632	1.57999	1.85317	0.95552	0.671979	0.0140275	0.044482	0.0866503	0.0233574	0.0993298	0.0854191	0.533139	0.188325	0.0148504	0.111818	0.250788	0.118063	0.0479691	0.500301	0.153464	0.0912348	0.0752162	0.0175748	1.18285	2.16458	0.871561	1.72769	1.2661	1.06606		4.02491	3.70317	2.84043	2.96066	2.33883	4.30856
437	1.27917	1.57173	0.549045	0.593002	1.37033	1.81843	0.173311	0.254556	0.316769	0.536271	0.368656	0.347907	0.462592	0.696861	1.63968	1.92118	0.996596	0.711695	0.0189485	0.0533413	0.0710872	0.013521	0.0813734	0.0687297	0.497639	0.163744	0.0100361	0.124846	0.275171	0.134028	0.0597748	0.549179	0.17968	0.110108	0.0904268	0.0100907	1.24237	2.24303	0.929324	1.80063	1.32007	1.11922		3.95201	3.63598	2.79777	2.92078	2.2981	4.25983
438	1.33823	1.63517	0.582004	0.627932	1.42904	1.87998	0.196193	0.286521	0.345819	0.572402	0.404136	0.37685	0.498998	0.732613	1.70133	1.99103	1.03887	0.753589	0.0258189	0.0631481	0.0571009	0.0058145	0.0653765	0.0538921	0.463284	0.141278	0.00607268	0.138846	0.301741	0.151483	0.0737835	0.601326	0.209035	0.131559	0.107655	0.00460209	1.30403	2.32297	0.98961	1.87555	1.3757	1.17418		3.87813	3.56733	2.75432	2.87951	2.25629	4.20954
439	1.40152	1.70189	0.617247	0.665521	1.49175	1.9436	0.223036	0.323689	0.378336	0.610772	0.443277	0.40809	0.540146	0.770747	1.76684	2.06458	1.08309	0.799021	0.0360319	0.0744002	0.0453516	0.00147045	0.0521894	0.0416388	0.429691	0.121246	0.0032729	0.153974	0.33217	0.171244	0.0910624	0.659009	0.243088	0.156918	0.127943	0.00127286	1.36964	2.40543	1.05419	1.95361	1.434	1.23235		3.80139	3.49458	2.70875	2.83481	2.21178	4.15615
440	1.46817	1.77126	0.654369	0.705272	1.5576	2.00884	0.253145	0.365141	0.413691	0.651058	0.485499	0.441306	0.585094	0.810852	1.83539	2.14105	1.12894	0.847351	0.0490197	0.0869342	0.0355887	0	0.0414412	0.0316744	0.396965	0.103386	0.00145128	0.170128	0.365731	0.19297	0.111133	0.721338	0.281165	0.185653	0.150876	0	1.4385	2.49	1.12237	2.03431	1.49453	1.29317		3.7225	3.41873	2.66154	2.78742	2.16521	4.10027
441	1.5373	1.84261	0.692968	0.746691	1.62575	2.07525	0.285823	0.409957	0.451256	0.692937	0.530225	0.476176	0.632897	0.852521	1.90615	2.21965	1.17609	0.897936	0.0642146	0.100587	0.0275618	0.000914359	0.0327612	0.0237033	0.365213	0.0874376	0.000422271	0.187208	0.401699	0.216324	0.133515	0.78742	0.322594	0.217231	0.176038	0.00068049	1.50987	2.57622	1.19346	2.11715	1.55682	1.35608		3.64217	3.34076	2.61315	2.73805	2.11722	4.04254
442	1.60806	1.91532	0.732641	0.789281	1.69534	2.14238	0.320372	0.457219	0.490403	0.736086	0.576874	0.512378	0.682613	0.895343	1.9783	2.29961	1.22422	0.950136	0.0810486	0.115195	0.0210201	0.00372473	0.0257788	0.0174302	0.33454	0.0731392	3.54e-07	0.205111	0.43935	0.240967	0.157731	0.856366	0.3667	0.251121	0.203014	0.00321131	1.58304	2.66368	1.26676	2.20163	1.62042	1.42054		3.5611	3.26166	2.56404	2.68746	2.06846	3.98357
443	1.67957	1.98872	0.772985	0.832549	1.76553	2.20977	0.356095	0.506007	0.530503	0.780182	0.62487	0.54959	0.733296	0.938911	2.051	2.38015	1.27299	1.00331	0.0989542	0.130596	0.0157132	0.00794231	0.0201232	0.0125596	0.305053	0.0602298	0	0.223735	0.477957	0.26656	0.183301	0.927284	0.412811	0.28679	0.231389	0.00748945	1.65729	2.75193	1.34158	2.28726	1.68487	1.48599		3.47999	3.18242	2.51469	2.63637	2.01956	3.92398
444	1.75097	2.06219	0.813595	0.875997	1.83547	2.27699	0.392296	0.555402	0.570929	0.824902	0.673632	0.58749	0.784005	0.982815	2.12345	2.4605	1.3221	1.05681	0.117363	0.146625	0.0113905	0.0130783	0.0154236	0.00879601	0.276857	0.0484483	0.000235681	0.242979	0.516795	0.292764	0.209746	0.999283	0.460253	0.323706	0.260749	0.0134119	1.73188	2.84053	1.41722	2.37353	1.74971	1.55187		3.39954	3.10402	2.46557	2.58551	1.97118	3.86438
445	1.82139	2.13505	0.85407	0.919131	1.90432	2.34357	0.428278	0.604486	0.611051	0.869923	0.722582	0.625757	0.833795	1.02665	2.1948	2.53988	1.37122	1.11001	0.135709	0.16312	0.00780148	0.0186439	0.0113094	0.00584396	0.250058	0.0375333	0.000521869	0.262742	0.555139	0.31924	0.236587	1.07147	0.508352	0.361337	0.290677	0.0208756	1.80611	2.92906	1.493	2.45995	1.81449	1.61763		3.32047	3.02745	2.41713	2.53561	1.92394	3.80541
446	1.88996	2.20668	0.894006	0.961455	1.97122	2.40906	0.463344	0.65234	0.650242	0.91492	0.771142	0.664068	0.881722	1.07	2.26423	2.61751	1.42002	1.16226	0.153422	0.179918	0.00469555	0.0241503	0.00740978	0.00340799	0.224763	0.0272238	0.000673037	0.28292	0.592263	0.345651	0.263346	1.14296	0.556436	0.399152	0.320759	0.0297776	1.87925	3.01708	1.5682	2.54602	1.87875	1.68272		3.24348	2.9537	2.36985	2.48742	1.8785	3.74767
447	1.95581	2.27643	0.933	1.00247	2.03534	2.47302	0.496796	0.698043	0.687873	0.959572	0.818732	0.702101	0.926842	1.11246	2.33092	2.69261	1.46818	1.21291	0.169936	0.196855	0.00182217	0.0291088	0.00335404	0.00119265	0.201077	0.0172587	0.000503656	0.303414	0.627443	0.371657	0.289542	1.21286	0.60383	0.436617	0.350579	0.0400149	1.95059	3.10415	1.64215	2.63124	1.94204	1.74657		3.16926	2.88375	2.32419	2.44166	1.83549	3.69179
448	2.02119	2.3462	0.972465	1.04347	2.09875	2.53634	0.530108	0.743721	0.725052	1.00487	0.867297	0.740991	0.971021	1.15511	2.39637	2.76698	1.51665	1.26367	0.186976	0.215051	0	0.0348255	0.000455269	0	0.179751	0.00904125	0.000623763	0.32511	0.662519	0.398138	0.316639	1.2837	0.652908	0.475577	0.381433	0.0523687	2.02258	3.1924	1.71722	2.71777	2.00592	1.81105		3.09589	2.81542	2.27889	2.39662	1.79362	3.63581
449	2.08859	2.41798	1.0138	1.08587	2.16383	2.60012	0.565039	0.791814	0.763225	1.05185	0.918776	0.781848	1.01655	1.19914	2.46249	2.84268	1.56641	1.31637	0.206326	0.235433	5.20652e-05	0.0427162	0	0.000691621	0.161159	0.00378742	0.00164445	0.348708	0.699527	0.426059	0.346141	1.35816	0.705998	0.517854	0.414645	0.0674689	2.09769	3.28372	1.79575	2.80759	2.07196	1.87802		3.0213	2.74614	2.23255	2.35034	1.75133	3.57774
450	2.15746	2.49128	1.05657	1.12936	2.2301	2.66423	0.601325	0.841885	0.802278	1.10022	0.972582	0.824322	1.06313	1.24427	2.52909	2.91934	1.6172	1.37059	0.227499	0.257547	0.00173435	0.0524567	0.00157762	0.00306133	0.144845	0.00095455	0.00338177	0.373826	0.738033	0.455208	0.377633	1.43557	0.762363	0.562881	0.449845	0.0849847	2.17517	3.37734	1.87704	2.89996	2.13967	1.94691		2.94597	2.67633	2.18551	2.30317	1.70881	3.51815
451	2.22729	2.56558	1.10035	1.17365	2.29709	2.72854	0.638704	0.893493	0.842095	1.1497	1.02813	0.868058	1.11045	1.2902	2.59597	2.99657	1.66877	1.4259	0.25001	0.280941	0.00480285	0.0637224	0.00477754	0.00690295	0.130354	0	0.00565179	0.400081	0.777603	0.485373	0.410699	1.51529	0.821264	0.610094	0.486662	0.104586	2.25425	3.47248	1.96033	2.99412	2.20856	2.01718		2.87038	2.60641	2.13808	2.25546	1.66628	3.45759
452	2.29754	2.64036	1.14472	1.21842	2.36435	2.79292	0.676911	0.946198	0.882558	1.20002	1.08484	0.912705	1.15823	1.33668	2.66293	3.07401	1.72084	1.48186	0.273373	0.305161	0.00901353	0.0761891	0.00918913	0.0120103	0.117227	0.000381144	0.00827057	0.427091	0.817802	0.51634	0.444925	1.59664	0.881964	0.658927	0.524728	0.125941	2.33419	3.56837	2.04492	3.08932	2.27813	2.08828		2.79502	2.53679	2.09058	2.20758	1.62393	3.39663
453	2.36769	2.71512	1.18924	1.26338	2.43139	2.85723	0.715683	0.99956	0.923553	1.25089	1.14212	0.957909	1.20615	1.3834	2.72978	3.15128	1.77314	1.53805	0.297105	0.329754	0.0141224	0.0895324	0.0144018	0.0181772	0.105009	0.00155535	0.0110542	0.454473	0.858196	0.547899	0.479896	1.67896	0.943723	0.708814	0.563673	0.14872	2.41423	3.66423	2.13006	3.18482	2.34791	2.15965		2.72038	2.46789	2.04331	2.15987	1.58198	3.33583
454	2.43721	2.78934	1.23348	1.30823	2.49777	2.92135	0.754756	1.05314	0.964963	1.30204	1.19938	1.00332	1.25392	1.43011	2.79633	3.22799	1.82543	1.59405	0.320718	0.354267	0.0198854	0.103428	0.020005	0.0251974	0.0932437	0.00297999	0.0138186	0.481846	0.89835	0.579836	0.515195	1.76159	1.0058	0.75919	0.603126	0.172592	2.49363	3.75929	2.21504	3.27986	2.41741	2.23074		2.64695	2.40014	1.9966	2.11269	1.54064	3.27577
455	2.50557	2.86253	1.27702	1.35266	2.563	2.98514	0.793865	1.1065	1.00667	1.35318	1.25605	1.04858	1.30123	1.47651	2.86237	3.30379	1.87742	1.64942	0.343729	0.378246	0.0260586	0.117551	0.025588	0.0328649	0.0814736	0.00411244	0.01638	0.508825	0.93783	0.611939	0.550409	1.84386	1.06747	0.809489	0.642717	0.197227	2.57161	3.85278	2.29912	3.37369	2.48613	2.301		2.5752	2.33395	1.95077	2.0664	1.5001	3.21699
456	2.57225	2.93415	1.31943	1.39636	2.62663	3.04847	0.832748	1.15919	1.04857	1.40403	1.31153	1.09334	1.34779	1.52233	2.92771	3.37829	1.92887	1.70373	0.365651	0.401239	0.0323979	0.131578	0.0307402	0.0409733	0.0692425	0.00441006	0.0185544	0.53503	0.976202	0.643997	0.585122	1.92513	1.12798	0.859146	0.682077	0.222294	2.64744	3.9439	2.38158	3.46557	2.55359	2.36988		2.50563	2.26973	1.90613	2.02135	1.46058	3.16008
457	2.63782	3.00486	1.3615	1.43981	2.68928	3.11143	0.87172	1.21224	1.0907	1.45543	1.36697	1.13818	1.39434	1.56834	2.99261	3.45201	1.98051	1.75794	0.387463	0.424456	0.0395897	0.146212	0.036284	0.0500704	0.057509	0.00490013	0.0205635	0.561321	1.01413	0.676593	0.620092	2.00653	1.1887	0.90938	0.72187	0.248559	2.72257	4.03417	2.46418	3.5572	2.62063	2.43841		2.43696	2.20655	1.86173	1.97654	1.42173	3.10362
458	2.70327	3.07563	1.40424	1.48366	2.75189	3.17422	0.911278	1.2668	1.13325	1.50825	1.42378	1.18385	1.44171	1.61538	3.05745	3.52572	2.03317	1.81316	0.410357	0.449222	0.0483717	0.162281	0.0432205	0.0607556	0.0474176	0.00686545	0.0227522	0.588701	1.05253	0.710357	0.65628	2.08956	1.25134	0.961632	0.762943	0.276898	2.79879	4.12542	2.54891	3.65055	2.68837	2.50791		2.36781	2.14332	1.81657	1.93091	1.38312	3.04606
459	2.76864	3.14647	1.44753	1.52785	2.81444	3.23691	0.951429	1.3227	1.17625	1.56228	1.48179	1.23032	1.48974	1.66326	3.12224	3.5994	2.08666	1.86922	0.434169	0.475255	0.0585774	0.17965	0.0514076	0.0729006	0.0387912	0.0101467	0.0251205	0.616999	1.09135	0.745142	0.693577	2.17409	1.31572	1.01567	0.805207	0.307151	2.8759	4.21744	2.6354	3.74527	2.7567	2.57821		2.29847	2.08021	1.7709	1.88473	1.34477	2.98772
460	2.83396	3.21742	1.49127	1.57237	2.87692	3.29953	0.99218	1.37972	1.21974	1.61732	1.54083	1.27752	1.5383	1.7118	3.18699	3.67305	2.14082	1.92595	0.458737	0.502272	0.07004	0.198183	0.060703	0.0863768	0.0314522	0.0145845	0.0276687	0.646047	1.13054	0.7808	0.731873	2.25997	1.38163	1.07127	0.848568	0.339157	2.95365	4.30999	2.72327	3.84104	2.82551	2.64915		2.22925	2.01743	1.72498	1.83823	1.30673	2.92891
461	2.89928	3.28847	1.53535	1.61717	2.93933	3.36215	1.03354	1.43767	1.26376	1.67315	1.60072	1.3254	1.58722	1.76081	3.25172	3.74664	2.19546	1.98317	0.483898	0.529989	0.0825929	0.217743	0.0709647	0.101056	0.0252235	0.0200195	0.0303972	0.675672	1.17004	0.817185	0.771061	2.34705	1.44888	1.1282	0.892936	0.372755	3.03182	4.40285	2.81215	3.93751	2.89471	2.7206		2.16043	1.95516	1.67907	1.79168	1.26905	2.86994
462	2.96464	3.35965	1.57965	1.66222	3.00165	3.42481	1.07551	1.49635	1.30836	1.72958	1.66129	1.3739	1.63634	1.81013	3.31643	3.82018	2.25041	2.0407	0.509487	0.558123	0.0960696	0.238195	0.0820506	0.116809	0.0199275	0.0262924	0.0333062	0.705706	1.2098	0.854151	0.81103	2.4352	1.51727	1.18622	0.938218	0.407783	3.11019	4.49578	2.90166	4.03433	2.96418	2.79238		2.09232	1.8936	1.63342	1.74534	1.23176	2.81115
463	3.03008	3.43099	1.62408	1.70749	3.06386	3.48757	1.1181	1.55557	1.35358	1.7864	1.72235	1.42296	1.68553	1.85956	3.38114	3.89364	2.3055	2.09836	0.535341	0.586392	0.110303	0.259404	0.0938184	0.133509	0.015387	0.0332437	0.0363958	0.735978	1.24976	0.891549	0.851672	2.52426	1.58661	1.24511	0.984324	0.44408	3.18852	4.58857	2.99143	4.13118	3.03383	2.86434		2.02523	1.83294	1.58829	1.69945	1.19491	2.75283
464	3.09564	3.50248	1.6685	1.75294	3.12597	3.55049	1.16133	1.61512	1.39946	1.84339	1.78374	1.47254	1.73462	1.90892	3.44586	3.96701	2.36055	2.15598	0.561298	0.614513	0.125127	0.281232	0.106126	0.151025	0.0114247	0.0407143	0.0396665	0.766319	1.28987	0.929233	0.892877	2.6141	1.6567	1.30463	1.03116	0.481485	3.26659	4.68098	3.08107	4.2277	3.10355	2.93634		1.95944	1.77337	1.54392	1.65427	1.15854	2.69531
465	3.16138	3.57416	1.71283	1.79854	3.18795	3.61361	1.20518	1.67481	1.44604	1.90036	1.84528	1.52258	1.78346	1.95804	3.51059	4.04029	2.41538	2.21338	0.587194	0.642202	0.140375	0.303544	0.118831	0.169231	0.00786311	0.0485447	0.0431184	0.796557	1.33007	0.967057	0.934535	2.70457	1.72734	1.36456	1.07864	0.519836	3.34418	4.77278	3.17022	4.32355	3.17323	3.00821		1.89525	1.71509	1.50058	1.61007	1.12269	2.63891
466	3.22732	3.64603	1.75694	1.84425	3.2498	3.67699	1.24968	1.73444	1.49337	1.95709	1.90679	1.57302	1.8319	2.00672	3.57535	4.11346	2.46983	2.27039	0.612865	0.669177	0.15588	0.326204	0.131792	0.187997	0.00452497	0.0565755	0.0467518	0.826524	1.37032	1.00487	0.976539	2.79552	1.79834	1.42466	1.12667	0.558973	3.42105	4.86375	3.25849	4.41841	3.24278	3.0798		1.83297	1.65827	1.45852	1.56708	1.0874	2.58395
467	3.29243	3.71715	1.80066	1.88978	3.31049	3.73971	1.29473	1.79431	1.54113	2.01377	1.96855	1.62377	1.87992	2.05516	3.63947	4.18592	2.52374	2.32696	0.638552	0.695773	0.172089	0.349512	0.145493	0.207764	0.00186375	0.0650273	0.0504717	0.856366	1.41046	1.04332	1.01924	2.88709	1.86989	1.48544	1.17547	0.599557	3.49738	4.95375	3.34663	4.51272	3.31228	3.15122		1.77163	1.60216	1.41677	1.52414	1.05226	2.52917
468	3.35597	3.78686	1.84397	1.93499	3.36936	3.80112	1.34026	1.85485	1.5891	2.07077	2.03092	1.67485	1.9277	2.10371	3.70249	4.25731	2.57723	2.38327	0.664602	0.722538	0.18949	0.373822	0.160422	0.228971	0.000387353	0.0742312	0.0542177	0.886378	1.45044	1.08298	1.06301	2.97952	1.94236	1.54751	1.22532	0.642215	3.57353	5.04294	3.43555	4.60719	3.38192	3.2227		1.71024	1.54599	1.37439	1.48017	1.01692	2.47339
469	3.41844	3.85563	1.88706	1.98005	3.42694	3.86164	1.38631	1.91606	1.63737	2.12814	2.09392	1.72634	1.97538	2.1524	3.76475	4.32794	2.63051	2.43946	0.691017	0.749507	0.207978	0.399081	0.17644	0.251492	0	0.0841944	0.0580422	0.91661	1.49041	1.12364	1.10775	3.07285	2.01578	1.61078	1.27617	0.686735	3.6496	5.13157	3.52517	4.70185	3.45174	3.29432		1.64909	1.49004	1.33168	1.43557	0.981584	2.41701
470	3.48033	3.92393	1.93012	2.02515	3.48376	3.92171	1.43293	1.97793	1.68608	2.18596	2.15755	1.77833	2.02306	2.20129	3.82657	4.3981	2.68376	2.4957	0.717799	0.776717	0.227447	0.425236	0.193408	0.275198	0.000605928	0.0949238	0.0619975	0.947113	1.53047	1.16508	1.15336	3.16715	2.09022	1.67516	1.32797	0.732901	3.72569	5.21989	3.61541	4.79671	3.52178	3.36614		1.58844	1.43455	1.28896	1.39076	0.946425	2.36042
471	3.54214	3.99224	1.97332	2.07045	3.54036	3.98176	1.48017	2.04047	1.73533	2.24427	2.22181	1.83089	2.07089	2.2504	3.88828	4.46812	2.73721	2.55214	0.744948	0.804203	0.247791	0.452235	0.211189	0.299962	0.00210937	0.106426	0.0661358	0.977938	1.57075	1.20708	1.19976	3.26244	2.1657	1.74057	1.38069	0.780502	3.80187	5.30813	3.70619	4.89178	3.59207	3.43821		1.52857	1.37978	1.24654	1.34613	0.911629	2.30403
472	3.60436	4.06103	2.01684	2.11614	3.59728	4.04223	1.52806	2.10366	1.78524	2.30315	2.28671	1.88411	2.11898	2.29978	3.95021	4.53829	2.79104	2.60892	0.772466	0.832001	0.268905	0.480025	0.229643	0.325657	0.00441456	0.118709	0.0705093	1.00913	1.61136	1.24944	1.24686	3.35879	2.24229	1.80693	1.43427	0.829324	3.87826	5.39655	3.79741	4.9871	3.66265	3.5106		1.46974	1.32599	1.20472	1.30209	0.87738	2.24822
473	3.66749	4.13077	2.06087	2.16239	3.65503	4.10354	1.57667	2.1675	1.83592	2.36265	2.35224	1.93808	2.16747	2.34948	4.01269	4.60892	2.84548	2.66621	0.800354	0.860147	0.290682	0.508553	0.248632	0.352156	0.00742573	0.131779	0.0751705	1.04075	1.65244	1.29192	1.29455	3.45623	2.32003	1.87416	1.48867	0.879152	3.95493	5.48538	3.88899	5.08267	3.73357	3.58337		1.41223	1.27343	1.16381	1.25906	0.843863	2.19339
474	3.73202	4.20193	2.10558	2.20939	3.71415	4.16613	1.62603	2.23198	1.88751	2.42283	2.41842	1.99288	2.21648	2.39954	4.07605	4.68033	2.90071	2.72416	0.828614	0.888677	0.313018	0.537767	0.268018	0.379331	0.0110471	0.145643	0.0801715	1.07284	1.69411	1.33431	1.34275	3.55482	2.39896	1.94216	1.54386	0.929775	4.03198	5.57486	3.98086	5.17852	3.80485	3.65659		1.35631	1.22236	1.12412	1.21743	0.811261	2.13995
475	3.79845	4.27498	2.15116	2.25731	3.77518	4.23043	1.67619	2.29711	1.9401	2.48377	2.48525	2.04859	2.26613	2.45	4.14062	4.75282	2.95694	2.78293	0.857246	0.917626	0.335806	0.567613	0.287662	0.407055	0.015183	0.160308	0.0855647	1.10546	1.73648	1.3764	1.39136	3.65459	2.47913	2.01086	1.59978	0.980978	4.1095	5.66524	4.07292	5.27466	3.87654	3.73031		1.30225	1.17303	1.08596	1.17761	0.779758	2.08829
476	3.86494	4.348	2.19656	2.30518	3.83597	4.2945	1.72688	2.36247	1.99313	2.54489	2.55214	2.10464	2.31565	2.50027	4.20517	4.82506	3.0133	2.84165	0.886124	0.946684	0.3593	0.598248	0.307829	0.435723	0.0199495	0.175732	0.091179	1.13814	1.77902	1.41866	1.4403	3.75524	2.56017	2.0801	1.6563	1.03318	4.18657	5.75523	4.16473	5.37027	3.94795	3.80395		1.24938	1.12484	1.04846	1.13848	0.748641	2.0373
477	3.92968	4.41916	2.24085	2.35212	3.89448	4.35653	1.77787	2.42778	2.04607	2.60574	2.61868	2.16055	2.36436	2.54988	4.26851	4.89581	3.06896	2.89957	0.915157	0.975594	0.383787	0.62984	0.328849	0.465744	0.0255263	0.19188	0.0968427	1.17052	1.82123	1.46166	1.48959	3.8565	2.64179	2.14984	1.71339	1.0869	4.26246	5.84366	4.25607	5.46476	4.01855	3.87701		1.19695	1.0771	1.01071	1.09883	0.717218	1.9858
478	3.99321	4.48904	2.28441	2.39849	3.95137	4.41715	1.82926	2.49322	2.09912	2.66653	2.68513	2.21654	2.41254	2.59907	4.331	4.96549	3.1242	2.95699	0.944402	1.00447	0.40921	0.66235	0.35068	0.497008	0.0319125	0.208768	0.102606	1.20279	1.8633	1.50529	1.53933	3.95848	2.72411	2.22022	1.77113	1.14208	4.33754	5.93099	4.3472	5.55849	4.08864	3.94975		1.1451	1.02994	0.972901	1.05893	0.685708	1.93406
479	4.0561	4.55824	2.3276	2.44461	4.00732	4.47699	1.88114	2.55899	2.15247	2.72749	2.75175	2.27281	2.46046	2.64811	4.393	5.03453	3.17928	3.01421	0.973913	1.03344	0.435511	0.695742	0.373281	0.529404	0.0391071	0.226412	0.108521	1.23511	1.90538	1.54948	1.58962	4.06127	2.80728	2.29134	1.8296	1.19863	4.41217	6.01767	4.43835	5.65184	4.15852	4.02238		1.094	0.98349	0.935267	1.01906	0.654329	1.88236
480	4.1189	4.62738	2.3708	2.49083	4.063	4.53668	1.9336	2.62526	2.20632	2.78883	2.81879	2.32957	2.50842	2.69721	4.45489	5.10335	3.23449	3.07152	1.00375	1.06261	0.462636	0.729978	0.396609	0.56282	0.0471093	0.24483	0.114637	1.26767	1.94766	1.59412	1.64056	4.165	2.89142	2.36334	1.88888	1.2565	4.48671	6.10414	4.52978	5.74518	4.22847	4.09515		1.04379	0.937887	0.89802	0.979504	0.623298	1.83097
481	4.18216	4.69705	2.41437	2.53748	4.11909	4.59684	1.98676	2.69223	2.26086	2.85076	2.8865	2.38704	2.55669	2.74664	4.51701	5.17239	3.29009	3.12923	1.03396	1.09209	0.490526	0.765022	0.420623	0.597148	0.0559182	0.264037	0.121005	1.30064	1.9903	1.63914	1.69225	4.26975	2.97669	2.43633	1.94908	1.31562	4.56153	6.19085	4.62172	5.83887	4.29879	4.16828		0.994626	0.89326	0.861377	0.940531	0.592834	1.78017
482	4.24643	4.76784	2.4587	2.58492	4.17625	4.65811	2.0407	2.76008	2.31629	2.9135	2.95515	2.44542	2.60556	2.79663	4.57974	5.24206	3.34636	3.18762	1.0646	1.12202	0.519126	0.800836	0.445281	0.632277	0.065533	0.284049	0.127676	1.33421	2.03349	1.68443	1.74479	4.37565	3.06321	2.51043	2.01026	1.37592	4.63699	6.27826	4.71444	5.93329	4.36977	4.24202		0.946656	0.849742	0.825556	0.902422	0.563154	1.73023
483	4.31227	4.84036	2.50416	2.63347	4.23516	4.72112	2.09552	2.82899	2.37281	2.97728	3.02499	2.50493	2.65529	2.84742	4.64345	5.31279	3.40357	3.24701	1.09573	1.1525	0.548378	0.837384	0.470541	0.668095	0.0759527	0.304884	0.134701	1.36855	2.07738	1.72991	1.79826	4.48279	3.15112	2.58577	2.07253	1.43733	4.71346	6.36681	4.80817	6.02879	4.44171	4.31659		0.900033	0.807463	0.790772	0.865453	0.534476	1.68141
484	4.38024	4.9152	2.5511	2.68348	4.29649	4.78649	2.15132	2.89916	2.4306	3.04229	3.09628	2.56578	2.70618	2.89927	4.70849	5.385	3.462	3.30767	1.12741	1.18366	0.578227	0.874627	0.496362	0.704493	0.0871765	0.326558	0.14213	1.40385	2.12217	1.77549	1.85277	4.59129	3.24055	2.66247	2.13596	1.49979	4.79131	6.45696	4.90317	6.12576	4.51489	4.39224		0.854911	0.766556	0.757242	0.829903	0.507019	1.63401
485	4.45088	4.99297	2.59991	2.73528	4.36091	4.85486	2.2082	2.97077	2.48987	3.10877	3.16927	2.62817	2.75851	2.95241	4.77522	5.45913	3.52193	3.36992	1.15969	1.2156	0.608616	0.91253	0.522702	0.74136	0.0992034	0.349087	0.150014	1.44028	2.16801	1.82108	1.90842	4.70124	3.33165	2.74065	2.20064	1.56322	4.87089	6.54915	4.99967	6.22457	4.58961	4.46919		0.81144	0.727153	0.725182	0.796048	0.481	1.58829
486	4.52222	5.07165	2.6492	2.78745	4.42584	4.92387	2.26536	3.04277	2.54978	3.17568	3.24264	2.69116	2.81109	3.00598	4.84239	5.53368	3.58243	3.43256	1.19228	1.24788	0.639617	0.951064	0.549615	0.779097	0.111976	0.37233	0.158054	1.47716	2.21416	1.86658	1.96462	4.81232	3.4238	2.8197	2.2661	1.62745	4.95049	6.64163	5.09632	6.32351	4.66451	4.54656		0.769156	0.688867	0.694009	0.763257	0.455899	1.54355
487	4.59231	5.14921	2.6976	2.83863	4.48878	4.99125	2.32216	3.11426	2.60954	3.24209	3.31524	2.75387	2.86282	3.05912	4.90873	5.60717	3.64259	3.49448	1.22492	1.28005	0.671345	0.990255	0.577187	0.818096	0.125458	0.396173	0.16599	1.51385	2.25992	1.91205	2.02085	4.92418	3.51643	2.89908	2.33192	1.69244	5.02854	6.7327	5.19194	6.42106	4.73835	4.62351		0.727572	0.651287	0.663079	0.730786	0.431116	1.49901
488	4.66173	5.22624	2.74557	2.88931	4.55054	5.05771	2.37894	3.18563	2.66946	3.30837	3.38753	2.81665	2.91407	3.1121	4.97462	5.68005	3.70266	3.55604	1.25773	1.31226	0.703808	1.03015	0.605421	0.858241	0.139682	0.420676	0.173931	1.55056	2.30553	1.95762	2.07735	5.03691	3.60977	2.97902	2.39828	1.75834	5.10566	6.82293	5.28702	6.5178	4.8116	4.70031		0.686807	0.614506	0.632525	0.698751	0.406751	1.45483
489	4.7311	5.30331	2.79353	2.93996	4.61194	5.12397	2.43603	3.25727	2.72981	3.37489	3.46	2.87981	2.96524	3.16516	5.04044	5.75275	3.76291	3.61764	1.2908	1.34467	0.737011	1.07079	0.634324	0.89941	0.154681	0.445901	0.181989	1.58749	2.35126	2.00342	2.13435	5.15061	3.70402	3.05974	2.46536	1.82529	5.18244	6.91288	5.38208	6.61431	4.88474	4.77724		0.646979	0.578618	0.602479	0.667265	0.382904	1.41114
490	4.80099	5.381	2.84191	2.99107	4.67379	5.19076	2.49377	3.32959	2.7909	3.442	3.53313	2.9437	3.01672	3.21856	5.10656	5.82573	3.82359	3.67966	1.32423	1.37742	0.770964	1.11221	0.663899	0.941484	0.170487	0.471907	0.190274	1.62486	2.39736	2.04957	2.19206	5.26539	3.7994	3.14145	2.53331	1.89343	5.25949	7.00311	5.47762	6.71118	4.95823	4.85458		0.608208	0.543715	0.573073	0.636442	0.359677	1.3681
491	4.87203	5.45991	2.89114	3.04312	4.7369	5.25878	2.55249	3.40299	2.853	3.51007	3.60739	3.00864	3.06889	3.27257	5.17337	5.89943	3.88495	3.74248	1.35813	1.41067	0.805672	1.15447	0.694152	0.984346	0.187133	0.498755	0.198897	1.66288	2.44407	2.09621	2.25073	5.38133	3.89614	3.22438	2.60232	1.96293	5.33742	7.09419	5.57414	6.809	5.03255	4.93261		0.570612	0.509893	0.544438	0.606396	0.337167	1.32586
492	4.94479	5.54059	2.94167	3.09658	4.80208	5.32877	2.61253	3.47785	2.91642	3.57948	3.68327	3.07497	3.12214	3.32744	5.24125	5.97429	3.94726	3.8065	1.39261	1.44456	0.841142	1.1976	0.725088	1.02787	0.204651	0.526505	0.207966	1.70176	2.49166	2.14346	2.31057	5.49854	3.99444	3.30875	2.67256	2.03391	5.41682	7.18668	5.67216	6.90834	5.10818	5.0116		0.53431	0.477243	0.516706	0.577241	0.315476	1.28456
493	5.01987	5.62365	2.99392	3.15194	4.87014	5.40145	2.67422	3.55457	2.98143	3.65057	3.76124	3.14303	3.17686	3.38342	5.31057	6.05075	4.01078	3.87209	1.42775	1.47924	0.877383	1.24165	0.756712	1.07195	0.223074	0.555217	0.217595	1.7417	2.54037	2.19145	2.37181	5.61712	4.09452	3.39479	2.7442	2.10653	5.49831	7.28114	5.77218	7.0098	5.18558	5.09184		0.49942	0.44586	0.49001	0.549091	0.294704	1.24435
494	5.09788	5.70966	3.04832	3.20967	4.9419	5.47752	2.7379	3.63356	3.04833	3.72373	3.84178	3.21313	3.23344	3.44077	5.38172	6.12927	4.07576	3.93964	1.46368	1.51488	0.914401	1.28666	0.789028	1.11646	0.242435	0.584951	0.227891	1.78293	2.59046	2.24031	2.43469	5.73715	4.1966	3.4827	2.8174	2.18093	5.58249	7.37813	5.87471	7.11397	5.26524	5.17361		0.466061	0.415836	0.464481	0.52206	0.27495	1.20539
495	5.17793	5.79814	3.10417	3.2689	5.01595	5.55604	2.80269	3.71382	3.11633	3.79801	3.92397	3.28443	3.29105	3.49908	5.45382	6.20903	4.14197	4.00857	1.5002	1.55115	0.952197	1.33255	0.822064	1.16168	0.262693	0.615486	0.238655	1.82498	2.64145	2.28919	2.49867	5.85867	4.30043	3.57208	2.89181	2.25664	5.66821	7.47661	5.97887	7.21975	5.34629	5.25641		0.434164	0.387182	0.440125	0.496202	0.256266	1.16768
496	5.25878	5.88814	3.1605	3.32853	5.09044	5.6356	2.86764	3.79423	3.18456	3.87237	4.00667	3.35596	3.34871	3.55778	5.52586	6.28901	4.20899	4.07803	1.53706	1.58769	0.990762	1.37919	0.855831	1.20796	0.283786	0.6466	0.249626	1.86732	2.69277	2.33734	2.56314	5.98159	4.40561	3.66241	2.96698	2.33316	5.75404	7.57527	6.08354	7.32577	5.42765	5.33961		0.403551	0.359802	0.416804	0.471432	0.238579	1.13107
497	5.34048	5.97953	3.21738	3.38866	5.16552	5.7162	2.93293	3.87503	3.25322	3.94704	4.09001	3.42792	3.40657	3.61692	5.59802	6.3693	4.27677	4.14809	1.5743	1.62455	1.03009	1.4266	0.890312	1.25523	0.305712	0.678358	0.26083	1.91003	2.74446	2.3851	2.62821	6.10583	4.5121	3.75375	3.04296	2.41062	5.84013	7.67424	6.1888	7.43217	5.50942	5.42327		0.374182	0.333631	0.394434	0.447655	0.221803	1.09547
498	5.42306	6.07216	3.27488	3.4494	5.24136	5.79783	2.99879	3.95642	3.32249	4.02221	4.17413	3.50052	3.46477	3.67651	5.67046	6.45001	4.34525	4.21876	1.61194	1.66178	1.07018	1.47479	0.925488	1.30341	0.328467	0.710821	0.272293	1.95319	2.79658	2.43276	2.69398	6.23132	4.61989	3.84615	3.11983	2.48915	5.92666	7.77366	6.29474	7.53909	5.5917	5.50743		0.346013	0.308605	0.37293	0.424776	0.205853	1.06077
499	5.50657	6.16591	3.33306	3.51087	5.31811	5.88051	3.0654	4.03865	3.39258	4.09811	4.25918	3.57393	3.52347	3.73661	5.74338	6.53122	4.41439	4.2901	1.65	1.69944	1.11103	1.52376	0.961343	1.35244	0.352048	0.744054	0.284038	1.99687	2.8492	2.48065	2.76056	6.35799	4.72896	3.93965	3.19766	2.56889	6.01377	7.87366	6.40146	7.64667	5.67459	5.59215		0.319002	0.284661	0.352207	0.4027	0.190643	1.02689
500	5.59106	6.26063	3.39199	3.57316	5.39594	5.96425	3.13296	4.12192	3.46368	4.17495	4.34529	3.64836	3.5828	3.79723	5.81693	6.61304	4.48415	4.36214	1.68851	1.73757	1.15263	1.57352	0.997858	1.40225	0.376452	0.778119	0.296092	2.04116	2.90238	2.52908	2.82804	6.48575	4.83929	4.03432	3.27651	2.64996	6.10163	7.97439	6.50904	7.75505	5.7582	5.67747		0.293108	0.261733	0.332181	0.381335	0.176089	0.993711
501	5.67656	6.3562	3.45174	3.63641	5.47499	6.04904	3.20168	4.20646	3.53597	4.25295	4.4326	3.724	3.64291	3.85842	5.89129	6.69556	4.55447	4.43491	1.72748	1.77622	1.19498	1.62407	1.03502	1.45277	0.401676	0.81308	0.308479	2.08612	2.95618	2.57836	2.89654	6.61454	4.95085	4.1302	3.35645	2.73251	6.19039	8.07597	6.61758	7.86436	5.84264	5.76346		0.268287	0.239758	0.312767	0.360584	0.162104	0.961147
502	5.76313	6.45247	3.51236	3.70071	5.55544	6.1349	3.27177	4.2925	3.60966	4.33231	4.52126	3.80104	3.70396	3.92021	5.96665	6.77888	4.62531	4.50847	1.76696	1.81544	1.23806	1.67544	1.0728	1.50394	0.427718	0.849	0.321224	2.13185	3.01065	2.6288	2.96616	6.74427	5.06363	4.22735	3.43755	2.81666	6.28022	8.17856	6.72717	7.97474	5.928	5.85017		0.244499	0.218672	0.293881	0.340354	0.148603	0.929095
503	5.85081	6.54931	3.57394	3.76617	5.63743	6.22183	3.34342	4.38026	3.68493	4.41327	4.61141	3.87968	3.76607	3.98263	6.04316	6.86309	4.69662	4.58283	1.80695	1.8553	1.28189	1.72762	1.11119	1.55569	0.454573	0.885942	0.334353	2.17842	3.06586	2.68073	3.037	6.87488	5.1776	4.32582	3.51986	2.90254	6.37127	8.28228	6.83789	8.08633	6.01438	5.93764		0.2217	0.19841	0.275438	0.320549	0.135501	0.897457
504	5.93963	6.64658	3.63653	3.83291	5.72112	6.30983	3.41683	4.46996	3.76197	4.49602	4.70318	3.96012	3.82941	4.04572	6.121	6.94828	4.76836	4.65806	1.84748	1.89582	1.32645	1.78062	1.15017	1.60795	0.48224	0.92397	0.347891	2.2259	3.12188	2.73445	3.10917	7.00628	5.29274	4.42566	3.60346	2.99029	6.46371	8.38727	6.94984	8.19928	6.1019	6.02594		0.199848	0.178908	0.257354	0.301076	0.122712	0.866135
505	6.03056	6.74592	3.70074	3.90145	5.80745	6.40026	3.4918	4.56145	3.8405	4.58039	4.79673	4.04216	3.89422	4.10986	6.20019	7.03475	4.84106	4.7347	1.88882	1.93724	1.37199	1.83484	1.18998	1.66117	0.510883	0.963135	0.362041	2.27447	3.1791	2.78907	3.18283	7.13943	5.40991	4.52722	3.6885	3.07989	6.55824	8.49421	7.0638	8.31416	6.19131	6.11564		0.179332	0.160662	0.24023	0.282486	0.110698	0.835824
506	6.12415	6.84856	3.76689	3.97198	5.89682	6.49403	3.56799	4.65437	3.92008	4.666	4.89201	4.12546	3.96047	4.17525	6.28052	7.12255	4.91514	4.81308	1.93114	1.97962	1.41868	1.89052	1.23076	1.7157	0.540615	1.0034	0.376911	2.32414	3.23775	2.84362	3.25798	7.27504	5.52968	4.63065	3.775	3.1712	6.65514	8.6034	7.18017	8.43118	6.28298	6.20707		0.160461	0.144075	0.224568	0.265253	0.0998664	0.807098
507	6.21988	6.95377	3.83463	4.04416	5.98864	6.59042	3.64532	4.74861	4.00072	4.75278	4.98881	4.20996	4.02794	4.24168	6.36185	7.21148	4.99037	4.89288	1.97426	2.02282	1.4664	1.94746	1.27244	1.77139	0.571352	1.04469	0.392379	2.37477	3.29756	2.8983	3.33444	7.41268	5.65164	4.73572	3.86283	3.2641	6.75391	8.71437	7.29847	8.54993	6.37644	6.29989		0.143075	0.128951	0.210127	0.249171	0.0900494	0.779681
508	6.31724	7.06083	3.90358	4.11764	6.08232	6.68874	3.72373	4.84409	4.08239	4.84066	5.08696	4.29561	4.09641	4.30893	6.44405	7.30133	5.06651	4.97379	2.01804	2.06668	1.51501	2.00545	1.31489	1.82805	0.60301	1.08692	0.408326	2.42621	3.35828	2.95333	3.41205	7.55192	5.77537	4.84224	3.95187	3.35848	6.85408	8.82666	7.41825	8.67002	6.47123	6.39374		0.127012	0.11509	0.19667	0.234032	0.0810795	0.753296
509	6.4157	7.16898	3.97338	4.19205	6.17728	6.78827	3.80317	4.94071	4.1651	4.92956	5.18627	4.38234	4.16563	4.37679	6.52697	7.39188	5.14331	5.05548	2.06232	2.11105	1.5644	2.06428	1.35802	1.88552	0.635507	1.13004	0.424629	2.4783	3.41963	3.00891	3.49065	7.69233	5.90044	4.94996	4.042	3.45425	6.95514	8.93982	7.53903	8.79102	6.56686	6.48828		0.112111	0.102294	0.183958	0.219627	0.0727891	0.727663
510	6.51474	7.27751	4.04366	4.26705	6.2729	6.88831	3.88357	5.03836	4.24883	5.01941	5.28654	4.47011	4.23538	4.44505	6.61048	7.48294	5.22055	5.13763	2.10695	2.15578	1.61444	2.12374	1.40171	1.94362	0.668758	1.17396	0.441168	2.53091	3.48137	3.06526	3.57005	7.83349	6.02642	5.05867	4.13309	3.5513	7.0566	9.05338	7.66035	8.91255	6.66288	6.58316		0.0982112	0.0903638	0.171752	0.205749	0.0650108	0.702507
511	6.61384	7.38568	4.11407	4.34228	6.3686	6.98817	3.96488	5.13695	4.33358	5.11014	5.38759	4.55885	4.30543	4.51347	6.69445	7.57429	5.29798	5.21992	2.15178	2.20072	1.66499	2.18364	1.44587	2.00219	0.70268	1.21861	0.457821	2.58389	3.54323	3.12257	3.65009	7.97496	6.15289	5.16816	4.22501	3.64953	7.15798	9.16689	7.78173	9.03418	6.7588	6.67802		0.0851515	0.0791019	0.159813	0.192191	0.057577	0.67755
512	6.71247	7.49275	4.18423	4.41738	6.46379	7.08713	4.04704	5.23638	4.41935	5.20166	5.48923	4.64852	4.37555	4.58186	6.77873	7.66572	5.37536	5.30204	2.19665	2.24572	1.71594	2.24375	1.49039	2.06104	0.737189	1.26392	0.474469	2.63708	3.60495	3.18107	3.73061	8.11631	6.27943	5.2782	4.31764	3.74883	7.25878	9.27988	7.90272	9.15551	6.85417	6.77253		0.072771	0.0683093	0.147902	0.178744	0.0503202	0.652513
513	6.81011	7.59799	4.25379	4.49201	6.55787	7.1845	4.12999	5.33655	4.50611	5.29391	5.59126	4.73905	4.44551	4.64999	6.86319	7.75702	5.45246	5.38365	2.24141	2.29062	1.76716	2.30389	1.53516	2.12002	0.772203	1.30981	0.490989	2.69033	3.66628	3.24096	3.81143	8.25711	6.40562	5.38857	4.41086	3.84909	7.35851	9.3919	8.02283	9.27614	6.94851	6.86633		0.0609086	0.0577877	0.135782	0.165201	0.0430727	0.62712
514	6.90938	7.70433	4.32459	4.56807	6.65387	7.28339	4.21478	5.43861	4.59486	5.38796	5.69483	4.83135	4.51664	4.71908	6.94919	7.84952	5.53039	5.46641	2.28669	2.33619	1.81927	2.365	1.58075	2.17977	0.808183	1.35683	0.507934	2.7447	3.72835	3.30252	3.89372	8.39932	6.53332	5.50074	4.50575	3.95167	7.45968	9.50557	8.1446	9.39851	7.04411	6.96151		0.0499169	0.0478662	0.12403	0.152061	0.0362506	0.602056
515	7.01264	7.81457	4.39831	4.64726	6.75451	7.38673	4.3022	5.54343	4.6863	5.48462	5.80091	4.92609	4.59013	4.79018	7.03779	7.94438	5.61018	5.55176	2.33308	2.3831	1.87282	2.42796	1.62766	2.24094	0.845535	1.40544	0.525816	2.80103	3.79223	3.36573	3.97844	8.54473	6.66428	5.61596	4.60319	4.05759	7.56452	9.62319	8.27025	9.52475	7.14305	7.05988		0.0402138	0.038987	0.113301	0.139894	0.030322	0.578094
516	7.11898	7.9278	4.47429	4.72889	6.85875	7.49346	4.39177	5.65053	4.77996	5.58342	5.90908	5.02289	4.66547	4.86285	7.12844	8.04107	5.69144	5.63914	2.38039	2.43108	1.92761	2.49246	1.67569	2.30332	0.884094	1.45542	0.544449	2.85894	3.85755	3.43033	4.06517	8.69267	6.79788	5.73367	4.70273	4.16628	7.67218	9.74381	8.39889	9.65397	7.24457	7.16068		0.0317356	0.0311207	0.103474	0.128596	0.0251982	0.555088
517	7.2275	8.04308	4.5519	4.8123	6.96553	7.60257	4.48305	5.75944	4.87538	5.68391	6.01893	5.12135	4.74217	4.93667	7.22059	8.13912	5.77379	5.72799	2.4284	2.47988	1.98341	2.55817	1.72463	2.3667	0.923692	1.50657	0.563646	2.91804	3.92392	3.49603	4.15346	8.84249	6.93349	5.85332	4.80395	4.27717	7.78178	9.86648	8.52962	9.78527	7.34786	7.26313		0.0244187	0.024238	0.0944298	0.118065	0.0207903	0.532893
518	7.33728	8.1595	4.63049	4.8968	7.07379	7.713	4.57557	5.86967	4.9721	5.78562	6.13002	5.22108	4.81975	5.01119	7.31368	8.238	5.85684	5.81773	2.4769	2.52922	2.03999	2.62476	1.77428	2.43085	0.964162	1.55866	0.583224	2.97792	3.99098	3.56259	4.24287	8.99353	7.0705	5.97435	4.90641	4.38969	7.89246	9.99025	8.66155	9.91776	7.45214	7.36647		0.0181997	0.0183095	0.0860471	0.108197	0.0170097	0.511363
519	7.44742	8.27614	4.7094	4.98173	7.18249	7.82374	4.66887	5.98074	5.06966	5.8881	6.24194	5.32169	4.89769	5.08598	7.40714	8.33723	5.94021	5.90779	2.52568	2.57885	2.09714	2.69192	1.82445	2.49557	1.00534	1.61148	0.602995	3.0382	4.05833	3.62972	4.33296	9.14512	7.20828	6.09621	5.00967	4.50327	8.00336	10.1142	8.79377	10.0505	7.55664	7.46994		0.0130149	0.0133059	0.0782051	0.098891	0.0137676	0.490353
520	7.55701	8.39207	4.788	5.0664	7.29058	7.93373	4.7625	6.09217	5.16759	5.99087	6.35427	5.42279	4.97552	5.1606	7.50043	8.4363	6.0235	5.99762	2.57455	2.62851	2.15464	2.75932	1.87492	2.56065	1.04705	1.66481	0.622776	3.09848	4.1256	3.69716	4.4233	9.29662	7.34622	6.21834	5.11329	4.61734	8.11359	10.2373	8.9254	10.1827	7.66057	7.57277		0.00880071	0.00919781	0.0707834	0.0900428	0.0109751	0.469717
521	7.66515	8.50637	4.86564	5.15014	7.39701	8.04195	4.85598	6.20349	5.26543	6.09348	6.46658	5.524	5.05273	5.23463	7.59298	8.53471	6.10634	6.08663	2.62327	2.67791	2.21227	2.82663	1.9255	2.62587	1.08913	1.71844	0.64238	3.15836	4.19242	3.76465	4.51344	9.44735	7.48369	6.34019	5.21685	4.73132	8.22231	10.3587	9.05554	10.3134	7.76315	7.67419		0.00549368	0.005956	0.0636613	0.0815499	0.00854338	0.44931
522	7.77093	8.61812	4.94167	5.23228	7.50072	8.14736	4.94886	6.31421	5.36273	6.19546	6.57846	5.62491	5.12884	5.30762	7.68424	8.63195	6.18834	6.17427	2.67166	2.72681	2.26981	2.89354	1.97599	2.69103	1.13141	1.77216	0.661622	3.21746	4.25841	3.83191	4.60294	9.59665	7.62008	6.4612	5.31991	4.84465	8.32864	10.4774	9.18329	10.4417	7.86359	7.77344		0.0030302	0.00355108	0.0567181	0.0733096	0.00638377	0.428985
523	7.87344	8.7264	5.01545	5.31213	7.60066	8.24893	5.04069	6.42385	5.45902	6.29636	6.68948	5.72515	5.20334	5.37914	7.77365	8.72754	6.26911	6.25996	2.7195	2.77494	2.32703	2.95972	2.02618	2.7559	1.17373	1.82575	0.680317	3.27537	4.32318	3.89868	4.69137	9.74388	7.75477	6.58083	5.42203	4.95675	8.4317	10.5925	9.30775	10.5667	7.9611	7.86975		0.0013467	0.00195371	0.0498331	0.065219	0.00440744	0.408598
524	7.97648	8.83486	5.08971	5.39261	7.70121	8.35081	5.13399	6.53516	5.55698	6.39872	6.80192	5.82698	5.27841	5.4512	7.86404	8.82405	6.35052	6.34634	2.76781	2.8236	2.38517	3.02669	2.07711	2.82159	1.21707	1.88035	0.699232	3.33392	4.38813	3.9669	4.78103	9.89194	7.89059	6.70161	5.52577	5.07073	8.53532	10.7082	9.43311	10.6926	8.05933	7.96667		0.000335455	0.000878	0.0430968	0.057268	0.00267957	0.388161
525	8.08365	8.94701	5.16702	5.47644	7.80648	8.45696	5.23098	6.65054	5.65895	6.50476	6.91778	5.93236	5.35604	5.52568	7.95792	8.92381	6.43426	6.4358	2.8175	2.87397	2.44529	3.09585	2.1297	2.88905	1.26227	1.93697	0.71909	3.39478	4.45463	4.03818	4.87397	10.0436	8.03012	6.8259	5.63334	5.18929	8.64302	10.8284	9.56315	10.8233	8.16161	8.06745		0	0.000170384	0.0367098	0.0495719	0.00134679	0.367855
526	8.1937	9.0617	5.24647	5.56266	7.91506	8.56607	5.33072	6.76895	5.76391	6.61354	7.03623	6.04043	5.43553	5.60185	8.0543	9.02587	6.51966	6.52745	2.86823	2.92558	2.50695	3.16667	2.18359	2.9579	1.30896	1.99518	0.739643	3.45731	4.52227	4.11175	4.96936	10.1978	8.17243	6.95282	5.74376	5.3113	8.75354	10.9517	9.69645	10.9573	8.26667	8.17088		0.000443646	0	0.0307174	0.0422154	0.000442471	0.347787
527	8.30541	9.17778	5.32719	5.65031	8.02554	8.67682	5.4323	6.88937	5.87085	6.72413	7.15644	6.15035	5.51615	5.67902	8.15216	9.1293	6.60608	6.62039	2.91962	2.97798	2.56968	3.23861	2.23839	3.02774	1.35676	2.05457	0.760642	3.5209	4.59064	4.18682	5.06633	10.3535	8.31654	7.08151	5.85605	5.43562	8.86562	11.0767	9.83158	11.0931	8.37326	8.27573		0.00176971	0.000535989	0.0251648	0.0352838	0	0.328065
528	8.41754	9.2941	5.40829	5.73844	8.1365	8.7879	5.53476	7.01076	5.97876	6.83559	7.27758	6.26125	5.59718	5.7565	8.25049	9.23315	6.69285	6.71372	2.97134	3.03072	2.63304	3.31116	2.29374	3.09818	1.4053	2.11473	0.781838	3.58493	4.65932	4.26263	5.16405	10.51	8.46149	7.21109	5.96921	5.56112	8.97797	11.202	9.96708	11.2293	8.48014	8.38079		0.0040815	0.00194749	0.0200972	0.0288619	5.27544e-05	0.308796
529	8.52886	9.40953	5.48888	5.82608	8.24653	8.898	5.63718	7.13209	6.08662	6.94697	7.39881	6.37229	5.6779	5.83359	8.34829	9.3365	6.77932	6.80652	3.02302	3.08334	2.69657	3.38378	2.34926	3.16883	1.45421	2.17523	0.802981	3.64878	4.72792	4.33839	5.26168	10.666	8.60633	7.3407	6.08228	5.68664	9.08935	11.326	10.1015	11.3644	8.58605	8.48484		0.00748234	0.00440365	0.0155598	0.0230347	0.000634115	0.290087
530	8.63813	9.5229	5.56806	5.91227	8.35422	9.00578	5.73863	7.25233	6.19343	7.05735	7.51931	6.48262	5.7576	5.90958	8.44456	9.43841	6.86482	6.8979	3.07431	3.13539	2.75982	3.45594	2.40458	3.2393	1.50311	2.23566	0.823822	3.71182	4.79601	4.41334	5.35837	10.8208	8.75009	7.46946	6.19427	5.81106	9.19847	11.4475	10.2335	11.4971	8.68973	8.58666		0.0120755	0.0080736	0.0115977	0.0178872	0.00177746	0.272044
531	8.74413	9.63307	5.64495	5.99606	8.45814	9.10994	5.83816	7.37045	6.29817	7.16577	7.63825	6.59138	5.83555	5.98377	8.53828	9.53793	6.94871	6.98696	3.12486	3.18639	2.82234	3.52712	2.45933	3.3092	1.55163	2.2956	0.844112	3.77344	4.86319	4.48669	5.45326	10.9732	8.89182	7.5965	6.3042	5.93323	9.30407	11.5648	10.3615	11.6257	8.78993	8.68502		0.0179644	0.0131265	0.00825628	0.0135044	0.00351617	0.254775
532	8.84561	9.73889	5.71866	6.07649	8.5569	9.20917	5.93485	7.48542	6.39983	7.27131	7.75478	6.69771	5.91103	6.05547	8.62844	9.63413	7.03033	7.0728	3.17431	3.23591	2.88367	3.59679	2.51313	3.37813	1.59939	2.35463	0.863602	3.83302	4.92905	4.55767	5.54553	11.1223	9.03056	7.72097	6.41109	6.05201	9.40488	11.6766	10.4841	11.749	8.8854	8.77871		0.0252523	0.0197315	0.00558061	0.00997133	0.00588363	0.238388
533	8.94542	9.84292	5.79108	6.15567	8.65341	9.30616	6.03093	7.59978	6.50088	7.37634	7.87112	6.80396	5.98583	6.12636	8.71739	9.72933	7.11142	7.15735	3.22361	3.28503	2.94501	3.66625	2.56698	3.44718	1.64747	2.41403	0.882844	3.89198	4.99468	4.62817	5.63719	11.2707	9.16857	7.84498	6.51738	6.16994	9.50364	11.7859	10.6046	11.8699	8.97882	8.87034		0.03385	0.0276994	0.00349467	0.00711582	0.00887788	0.222586
534	9.04694	9.94823	5.86452	6.23619	8.75131	9.4043	6.12906	7.71649	6.60424	7.48362	7.98979	6.91276	6.06204	6.19841	8.80792	9.82623	7.194	7.24302	3.27382	3.33505	3.00771	3.73705	2.62202	3.51758	1.69706	2.4752	0.902507	3.95206	5.06133	4.70041	5.73064	11.4212	9.30856	7.97107	6.62596	6.29008	9.6037	11.8965	10.7267	11.9923	9.07348	8.96311		0.0435891	0.0367194	0.00189281	0.00471869	0.012465	0.207032
535	9.14979	10.0545	5.93876	6.31777	8.85026	9.50326	6.22892	7.83519	6.70955	7.5928	8.11044	7.02374	6.13939	6.27138	8.8997	9.92448	7.27778	7.32954	3.3248	3.38579	3.07159	3.80899	2.67809	3.58916	1.74799	2.53791	0.922519	4.01305	5.12883	4.77412	5.82559	11.5735	9.4502	8.09892	6.73647	6.41212	9.70472	12.0079	10.8502	12.1157	9.16905	9.05669		0.0544539	0.0467783	0.000775869	0.00279424	0.0166306	0.191763
536	9.25358	10.1613	6.01356	6.40014	8.94989	9.60271	6.33019	7.95551	6.81645	7.70352	8.23271	7.13653	6.21761	6.34504	8.99241	10.0237	7.3625	7.41668	3.37641	3.43712	3.13646	3.88186	2.73503	3.66174	1.80008	2.60195	0.942809	4.07475	5.19699	4.84904	5.92175	11.7271	9.59316	8.22822	6.84854	6.53574	9.80633	12.1197	10.9745	12.2397	9.26519	9.15077		0.0664289	0.0578626	0.000144659	0.00135677	0.0213601	0.176821
537	9.35791	10.2684	6.08868	6.48301	9.04986	9.70232	6.43256	8.07708	6.92459	7.81543	8.35627	7.25076	6.29645	6.41915	9.08574	10.1237	7.44788	7.50418	3.42848	3.48887	3.20216	3.95548	2.79268	3.73514	1.85315	2.66709	0.963305	4.13696	5.26564	4.92488	6.01885	11.8817	9.73713	8.35866	6.96182	6.66061	9.90821	12.2317	11.0993	12.3641	9.36159	9.24503		0.0794984	0.0699589	0	0.000420587	0.026639	0.162245
538	9.4624	10.3754	6.16389	6.56611	9.14982	9.80178	6.53572	8.19954	7.03361	7.92817	8.48076	7.36605	6.37565	6.49346	9.17936	10.2239	7.53363	7.5918	3.48088	3.54089	3.26848	4.02964	2.85089	3.80918	1.90703	2.73312	0.983935	4.19949	5.33459	5.00139	6.11661	12.0368	9.88178	8.48992	7.07595	6.78641	10.01	12.3435	11.2241	12.4884	9.45791	9.33914		0.0936467	0.0830539	0.000342714	0	0.0324527	0.148074
539	9.56666	10.482	6.23896	6.64916	9.24942	9.90075	6.63934	8.3225	7.14315	8.04139	8.60584	7.48203	6.45494	6.56775	9.27296	10.3241	7.61949	7.67928	3.53344	3.59301	3.33525	4.10415	2.9095	3.88368	1.96154	2.79982	1.00463	4.26215	5.40368	5.07828	6.21473	12.1922	10.0268	8.62169	7.19058	6.91282	10.1114	12.4546	11.3485	12.6123	9.55382	9.4328		0.108858	0.0971342	0.00117362	0.000109311	0.0387869	0.134348
540	9.67029	10.5878	6.31365	6.73188	9.34831	9.99891	6.74312	8.44561	7.25287	8.15474	8.73115	7.59833	6.53406	6.64178	9.36621	10.424	7.70517	7.76638	3.58603	3.64508	3.40229	4.17881	2.96835	3.95848	2.01652	2.86696	1.02531	4.32472	5.47271	5.15529	6.31293	12.3474	10.1718	8.75367	7.30534	7.03952	10.2119	12.5648	11.4722	12.7353	9.64899	9.52568		0.125117	0.112186	0.00249354	0.000762825	0.0456269	0.121107
541	9.77291	10.6925	6.38773	6.814	9.44613	10.0959	6.84674	8.5685	7.36241	8.26784	8.85635	7.71457	6.61274	6.71529	9.45879	10.5232	7.7904	7.85285	3.63849	3.69695	3.4694	4.25343	3.02729	4.03338	2.07177	2.93433	1.04591	4.38702	5.54152	5.23215	6.41094	12.502	10.3166	8.88554	7.41988	7.16618	10.3114	12.6737	11.5947	12.8572	9.7431	9.61746		0.142409	0.128197	0.00430329	0.00197485	0.0529583	0.10839
542	9.87413	10.7957	6.46096	6.89524	9.54254	10.1915	6.94987	8.69079	7.4714	8.38036	8.9811	7.83038	6.69073	6.78807	9.55039	10.6213	7.87491	7.93845	3.69067	3.74845	3.53641	4.3278	3.08615	4.10821	2.12713	3.0017	1.06636	4.44884	5.60993	5.30858	6.50846	12.6557	10.4607	9.01699	7.53385	7.29249	10.4094	12.7809	11.7156	12.9775	9.8358	9.70782		0.160716	0.145153	0.0066037	0.00375968	0.0607665	0.0962371
543	9.97355	10.897	6.53312	6.97532	9.63718	10.2853	7.05221	8.81212	7.5795	8.49194	9.10503	7.94539	6.76776	6.85986	9.64067	10.718	7.9584	8.02292	3.74242	3.79943	3.60313	4.40174	3.14478	4.1828	2.18242	3.06886	1.08658	4.51	5.67775	5.38432	6.60522	12.808	10.604	9.14772	7.64689	7.41812	10.5056	12.886	11.8345	13.0959	9.92677	9.79644		0.180024	0.163041	0.00939557	0.00613163	0.0690371	0.0846881
544	10.0708	10.9963	6.60397	7.05395	9.7297	10.377	7.15344	8.93211	7.68635	8.60221	9.22781	8.05922	6.84357	6.93043	9.72933	10.8129	8.04062	8.10601	3.79359	3.84973	3.66938	4.47504	3.20302	4.25696	2.23747	3.13558	1.1065	4.57028	5.74481	5.4591	6.70092	12.9586	10.7459	9.27739	7.75863	7.54276	10.5996	12.9887	11.951	13.2119	10.0157	9.88301		0.200317	0.181847	0.0126797	0.00910501	0.0777555	0.0737825
545	10.1654	11.093	6.67327	7.13088	9.81975	10.4662	7.25324	9.05041	7.79159	8.71083	9.34909	8.17151	6.91789	6.99954	9.81604	10.9058	8.12127	8.18748	3.84403	3.8992	3.73498	4.54751	3.26072	4.33051	2.29209	3.20164	1.12606	4.6295	5.81093	5.53264	6.7953	13.1071	10.8863	9.40572	7.86872	7.66607	10.691	13.0887	12.0646	13.3253	10.1022	9.9672		0.22158	0.201558	0.016457	0.0126941	0.0869072	0.06356
546	10.2571	11.1869	6.74078	7.20581	9.90699	10.5527	7.3513	9.16663	7.89487	8.81744	9.46851	8.28187	6.99048	7.06696	9.90048	10.9962	8.20009	8.26708	3.89359	3.94767	3.79973	4.61895	3.31771	4.40329	2.34612	3.26683	1.14517	4.68745	5.87593	5.60467	6.88805	13.2531	11.0248	9.53238	7.97681	7.78775	10.7797	13.1855	12.1751	13.4357	10.186	10.0487		0.243796	0.222161	0.0207283	0.0169132	0.0964778	0.0540602
547	10.3455	11.2776	6.80629	7.27847	9.99105	10.6361	7.44731	9.28042	7.99583	8.92168	9.58573	8.38993	7.06105	7.13244	9.98233	11.0839	8.2768	8.34456	3.94213	3.99499	3.86346	4.68917	3.37384	4.47511	2.39937	3.33093	1.16377	4.74394	5.93964	5.67493	6.9789	13.3962	11.1611	9.65707	8.08254	7.90746	10.8651	13.2789	12.2818	13.5426	10.2668	10.1272		0.266951	0.243643	0.0254942	0.0217767	0.106453	0.0453228
548	10.4301	11.3647	6.86954	7.34858	10.0716	10.7161	7.54094	9.39139	8.09411	9.0232	9.7004	8.49533	7.12935	7.19575	10.0613	11.1685	8.35112	8.41968	3.98948	4.04101	3.92599	4.75796	3.42895	4.54579	2.45168	3.3937	1.18178	4.79876	6.00187	5.74314	7.06757	13.5361	11.2948	9.77947	8.18554	8.02488	10.947	13.3684	12.3846	13.6458	10.3442	10.2023		0.291028	0.265989	0.0307558	0.0272988	0.116817	0.0373875
549	10.5106	11.448	6.93032	7.41587	10.1483	10.7924	7.63188	9.4992	8.18937	9.12164	9.81217	8.59769	7.19512	7.25664	10.137	11.2496	8.42278	8.49218	4.03551	4.08556	3.98713	4.82514	3.48289	4.61515	2.50286	3.45494	1.19914	4.85173	6.06245	5.80903	7.15377	13.6723	11.4257	9.89926	8.28547	8.1397	11.025	13.4537	12.4828	13.7447	10.4178	10.2738		0.316012	0.289187	0.0365137	0.0334939	0.127557	0.0302939
550	10.5865	11.5271	6.98838	7.48006	10.2207	10.8646	7.71982	9.60345	8.28124	9.21665	9.92069	8.69663	7.25809	7.31488	10.2091	11.3269	8.49149	8.56181	4.08006	4.1285	4.04669	4.8905	3.53549	4.68303	2.55274	3.51443	1.21577	4.90264	6.1212	5.87232	7.23722	13.8045	11.5533	10.0162	8.38196	8.25159	11.0987	13.5344	12.5762	13.8392	10.4875	10.3413		0.341887	0.313223	0.0427689	0.0403762	0.138658	0.0240818
551	10.6601	11.604	7.0449	7.54286	10.2905	10.9344	7.80697	9.70667	8.37215	9.31062	10.029	8.79506	7.32008	7.37212	10.2796	11.4027	8.55926	8.63017	4.12429	4.17089	4.10605	4.95554	3.58802	4.75096	2.60283	3.574	1.23217	4.95288	6.17982	5.93472	7.31984	13.936	11.6807	10.1332	8.4775	8.36278	11.1702	13.6124	12.6671	13.9316	10.5551	10.4068		0.369438	0.338771	0.0498082	0.0482302	0.150632	0.0186994
552	10.7333	11.6808	7.10109	7.60589	10.3593	11.0034	7.89537	9.81114	8.4643	9.40577	10.1398	8.89559	7.38273	7.42986	10.3501	11.4792	8.6279	8.69875	4.16927	4.21372	4.16646	5.0216	3.64159	4.8203	2.65444	3.63528	1.24879	5.00369	6.23977	5.99779	7.40341	14.0698	11.8103	10.253	8.57436	8.47529	11.2414	13.6896	12.7579	14.0243	10.6226	10.472		0.399228	0.366318	0.05783	0.0572299	0.163854	0.0140519
553	10.8058	11.7569	7.15669	7.66873	10.4269	11.0715	7.98439	9.91621	8.55704	9.50144	10.2521	8.99734	7.44556	7.48765	10.4202	11.5557	8.69687	8.76714	4.21463	4.25671	4.22751	5.08825	3.69584	4.89057	2.70711	3.69768	1.2655	5.0547	6.30048	6.06112	7.48741	14.2048	11.9412	10.3745	8.67186	8.58851	11.3118	13.7657	12.848	14.1167	10.6894	10.5366		0.430912	0.395571	0.0667027	0.0672241	0.178105	0.0101144
554	10.8771	11.8319	7.21149	7.73095	10.493	11.1381	8.07343	10.0212	8.64973	9.597	10.365	9.09946	7.50807	7.54506	10.4896	11.6317	8.76559	8.83495	4.26003	4.29957	4.2888	5.15506	3.75038	4.96126	2.76037	3.76066	1.28216	5.10554	6.3614	6.12429	7.57133	14.34	12.0725	10.4967	8.76931	8.70183	11.3809	13.8401	12.9368	14.208	10.7552	10.5999		0.464143	0.426236	0.0762944	0.0780616	0.193165	0.00686193
555	10.9467	11.9052	7.26525	7.79214	10.5573	11.203	8.16185	10.1254	8.74171	9.69181	10.4774	9.20109	7.56977	7.60164	10.5577	11.7065	8.83351	8.90177	4.30514	4.342	4.34994	5.2216	3.80484	5.0319	2.81374	3.82363	1.29865	5.15583	6.42197	6.18685	7.65464	14.4742	12.2033	10.6186	8.86605	8.81465	11.4483	13.9126	13.0237	14.2976	10.8194	10.6617		0.498574	0.458019	0.0864734	0.0895912	0.208815	0.00426947
556	11.0141	11.9765	7.31773	7.85185	10.6196	11.2659	8.24905	10.2282	8.83233	9.78522	10.5884	9.30137	7.63017	7.65694	10.6242	11.7795	8.90006	8.9672	4.34961	4.38372	4.41054	5.28745	3.85883	5.102	2.86675	3.88604	1.31482	5.20521	6.48162	6.24839	7.73683	14.6064	12.3325	10.7391	8.96139	8.92634	11.5136	13.9827	13.1082	14.3848	10.8815	10.7213		0.53386	0.490628	0.0971079	0.101662	0.224835	0.00231202
557	11.079	12.0451	7.36871	7.90968	10.6796	11.3264	8.33441	10.3289	8.92094	9.8766	10.6972	9.39944	7.68878	7.71052	10.6886	11.8501	8.9647	9.03085	4.39309	4.42443	4.47019	5.35217	3.91198	5.17106	2.91894	3.94731	1.33054	5.25328	6.53981	6.30849	7.81738	14.7355	12.4594	10.8573	9.05466	9.03629	11.5762	14.05	13.1896	14.469	10.9411	10.7784		0.569653	0.523769	0.108066	0.114122	0.241006	0.000964623
558	11.1407	12.1107	7.41795	7.9652	10.7372	11.3842	8.41731	10.4268	9.00689	9.9653	10.8026	9.49444	7.74511	7.76194	10.7506	11.9178	9.02685	9.0923	4.43524	4.46384	4.5285	5.41534	3.96391	5.23861	2.96983	4.00688	1.34569	5.29968	6.59596	6.36672	7.89578	14.8606	12.5829	10.972	9.14517	9.1439	11.6358	14.1142	13.2675	14.5495	10.9975	10.8324		0.605608	0.557147	0.119216	0.12682	0.257109	0.000202276
559	11.199	12.1727	7.46522	8.01798	10.7919	11.439	8.49714	10.5213	9.08953	10.0507	10.9038	9.58551	7.79867	7.81075	10.8096	11.9818	9.08596	9.15116	4.47572	4.50167	4.58508	5.47653	4.01425	5.30416	3.01895	4.06418	1.36012	5.34403	6.64953	6.42266	7.9715	14.9804	12.7022	11.0823	9.23226	9.24856	11.6918	14.1749	13.3412	14.6256	11.0504	10.883		0.641379	0.590471	0.130427	0.139606	0.272923	0
560	11.2532	12.2306	7.51029	8.0676	10.8437	11.4904	8.57327	10.6117	9.1682	10.1321	10.9997	9.6718	7.84896	7.85652	10.8653	12.0416	9.14146	9.20703	4.51418	4.53761	4.63952	5.53531	4.06261	5.36721	3.06583	4.11864	1.37369	5.38596	6.69996	6.47587	8.04404	15.0941	12.8162	11.1871	9.31524	9.34964	11.7439	14.2316	13.4101	14.6967	11.0992	10.9296		0.676618	0.623446	0.141566	0.152328	0.288229	0.000332808
561	11.3033	12.2844	7.55298	8.11452	10.8915	11.5381	8.64651	10.6987	9.2435	10.2102	11.0924	9.75463	7.89621	7.8994	10.9174	12.097	9.19369	9.25998	4.55106	4.57203	4.69251	5.59218	4.10955	5.42858	3.1115	4.17141	1.3864	5.42577	6.74832	6.52693	8.11397	15.2031	12.927	11.2887	9.39488	9.44821	11.7918	14.284	13.4741	14.7632	11.1441	10.9722		0.712761	0.657304	0.153138	0.165734	0.303875	0.00147715
562	11.3495	12.3346	7.59348	8.15955	10.9352	11.5824	8.71811	10.7836	9.31656	10.286	11.1843	9.83591	7.94117	7.94005	10.9661	12.1484	9.24351	9.31054	4.58707	4.60549	4.74498	5.64799	4.15587	5.48937	3.15717	4.22391	1.39836	5.46412	6.79599	6.57671	8.18229	15.31	13.0368	11.3897	9.4725	9.54565	11.8361	14.332	13.5339	14.8262	11.1857	11.0113		0.751162	0.693201	0.165633	0.180498	0.32068	0.0036466
563	11.3924	12.3816	7.63203	8.20277	10.9752	11.6235	8.78814	10.8666	9.38761	10.3598	11.2749	9.91562	7.9841	7.97871	11.0121	12.1964	9.29118	9.35897	4.62223	4.63804	4.79687	5.7028	4.20159	5.54955	3.20269	4.276	1.40971	5.50113	6.84288	6.62525	8.24911	15.4147	13.1453	11.4898	9.54821	9.64191	11.8773	14.3764	13.59	14.8861	11.2242	11.0474		0.791352	0.730734	0.178894	0.196355	0.338378	0.00672185
564	11.4324	12.4258	7.6689	8.24428	11.0124	11.662	8.85666	10.9478	9.45685	10.4317	11.3643	9.99374	8.02526	8.01564	11.0557	12.2417	9.33699	9.40555	4.6566	4.66973	4.84815	5.75669	4.24672	5.60909	3.2479	4.32753	1.42056	5.53694	6.88886	6.67258	8.31451	15.5171	13.2524	11.5886	9.62213	9.73691	11.9156	14.4177	13.6428	14.943	11.2602	11.0808		0.832864	0.769498	0.192763	0.213038	0.356704	0.0105836
565	11.47	12.4676	7.70436	8.28418	11.0474	11.6982	8.92375	11.0274	9.5245	10.502	11.452	10.0703	8.06492	8.05109	11.0974	12.2849	9.38119	9.45054	4.69021	4.70062	4.89876	5.80973	4.29126	5.66794	3.29263	4.37834	1.43102	5.57168	6.93381	6.71874	8.37859	15.6172	13.3578	11.6859	9.69438	9.8306	11.9515	14.4563	13.6928	14.9973	11.2938	11.1118		0.875229	0.809089	0.207085	0.230282	0.375393	0.0151125
566	11.5056	12.5074	7.73867	8.32254	11.0808	11.7325	8.98947	11.1054	9.59075	10.5709	11.5378	10.1452	8.10335	8.08531	11.1377	12.3266	9.42405	9.49423	4.72311	4.73075	4.94867	5.86201	4.33523	5.72608	3.33673	4.4283	1.44123	5.60548	6.97764	6.76377	8.44145	15.7151	13.4613	11.7813	9.76508	9.92291	11.9855	14.4928	13.7407	15.0492	11.3254	11.1409		0.91798	0.849105	0.221701	0.247822	0.394181	0.0201893
567	11.5399	12.5458	7.7721	8.35948	11.1132	11.7655	9.05391	11.1819	9.65582	10.6385	11.6216	10.2184	8.14081	8.11855	11.1771	12.3675	9.46585	9.53688	4.75533	4.76017	4.99782	5.9136	4.37864	5.78348	3.38004	4.47725	1.45128	5.63849	7.02021	6.80771	8.50319	15.8106	13.5626	11.8745	9.83434	10.0138	12.018	14.5278	13.7868	15.099	11.3554	11.1684		0.960647	0.88914	0.236456	0.265392	0.412801	0.0256946
568	11.5731	12.583	7.80492	8.39507	11.1453	11.7974	9.11712	11.2572	9.71993	10.705	11.703	10.29	8.17757	8.15108	11.2159	12.408	9.50684	9.57876	4.78692	4.78893	5.04619	5.96457	4.42151	5.84009	3.4224	4.52504	1.46131	5.67082	7.06142	6.85058	8.56388	15.9038	13.6616	11.9651	9.90229	10.1031	12.0493	14.5618	13.8317	15.147	11.3841	11.1948		1.00276	0.928791	0.251192	0.282727	0.430991	0.0315092
569	11.6059	12.6195	7.83737	8.42941	11.1778	11.8287	9.17917	11.3313	9.78327	10.7708	11.7818	10.36	8.21389	8.18313	11.2548	12.4489	9.5473	9.62015	4.81791	4.81707	5.09371	6.01501	4.46383	5.89588	3.46365	4.57154	1.47142	5.70263	7.10115	6.89243	8.62365	15.9946	13.7579	12.0529	9.96905	10.1909	12.0799	14.5953	13.8759	15.1934	11.4118	11.2203		1.04386	0.967654	0.265753	0.299561	0.448483	0.0375138
570	11.6356	12.6527	7.86812	8.46123	11.2078	11.8572	9.23906	11.4029	9.84418	10.8343	11.8574	10.4272	8.24799	8.21308	11.2916	12.4873	9.5855	9.65951	4.84764	4.84391	5.14021	6.06409	4.50513	5.95049	3.50373	4.61661	1.48106	5.73287	7.13885	6.93254	8.68159	16.0812	13.8508	12.137	10.0335	10.2767	12.1076	14.6259	13.9167	15.2364	11.4363	11.2429		1.08534	1.00701	0.28047	0.316678	0.466001	0.0440863
571	11.6601	12.6803	7.89593	8.48954	11.2326	11.8808	9.29603	11.4711	9.90128	10.8945	11.9295	10.491	8.27835	8.23953	11.3246	12.5204	9.61995	9.69549	4.87558	4.86891	5.18561	6.1112	4.54507	6.00371	3.54277	4.66032	1.4897	5.76073	7.17428	6.97039	8.737	16.1627	13.9402	12.2174	10.0947	10.3606	12.1304	14.6512	13.9519	15.2743	11.4558	11.2606		1.12865	1.04819	0.295738	0.334905	0.484324	0.0516136
572	11.6802	12.7031	7.92128	8.5149	11.2532	11.9003	9.3505	11.5364	9.95523	10.9519	11.9986	10.5519	8.30566	8.2631	11.3543	12.5492	9.65131	9.72865	4.90204	4.89236	5.23001	6.15666	4.58385	6.05574	3.58088	4.70281	1.49755	5.78659	7.20776	7.0063	8.79024	16.2398	14.0265	12.2946	10.1532	10.4426	12.1492	14.6721	13.9823	15.3078	11.471	11.2742		1.17343	1.09081	0.311497	0.354034	0.503274	0.0599899
573	11.6968	12.7223	7.94465	8.53785	11.2704	11.9165	9.4029	11.5992	10.0067	11.007	12.0652	10.6104	8.33059	8.2844	11.3815	12.5747	9.68022	9.75954	4.92731	4.91456	5.27354	6.20079	4.6217	6.10676	3.6182	4.74423	1.50479	5.81086	7.23961	7.04057	8.84166	16.3133	14.1103	12.3691	10.2093	10.523	12.1645	14.6894	14.0088	15.3377	11.4828	11.2845		1.21931	1.13452	0.327686	0.373863	0.522674	0.0691092
574	11.7107	12.7389	7.96651	8.55893	11.2853	11.9303	9.45368	11.6602	10.0563	11.0602	12.1297	10.667	8.35382	8.30404	11.4068	12.598	9.70733	9.78872	4.95167	4.93581	5.31631	6.24392	4.65885	6.15697	3.65484	4.78473	1.51161	5.83392	7.27017	7.07353	8.8916	16.384	14.1918	12.4415	10.2636	10.6019	12.1774	14.704	14.0324	15.3648	11.492	11.2923		1.26593	1.17896	0.344244	0.394184	0.542346	0.0788655
575	11.723	12.7537	7.98734	8.57867	11.2988	11.9426	9.50326	11.7198	10.1047	11.1122	12.1926	10.7221	8.37603	8.32263	11.4308	12.6199	9.73328	9.81673	4.97543	4.95641	5.35841	6.28638	4.6955	6.20654	3.69094	4.82444	1.51822	5.85618	7.29975	7.1055	8.94042	16.4528	14.2718	12.5123	10.3165	10.6796	12.1884	14.7167	14.054	15.3897	11.4995	11.2985		1.31292	1.22377	0.361111	0.414794	0.562112	0.089153
576	11.7344	12.7679	8.00761	8.59764	11.3119	11.954	9.55207	11.7785	10.1526	11.1634	12.2545	10.7763	8.39788	8.34079	11.4541	12.6416	9.75872	9.84413	4.99888	4.97665	5.39997	6.32849	4.73187	6.25568	3.72662	4.86353	1.52482	5.87803	7.3287	7.13678	8.98847	16.5205	14.3505	12.5823	10.3684	10.7562	12.1984	14.7284	14.0745	15.4132	11.5061	11.3036		1.35991	1.26859	0.378224	0.435487	0.581795	0.0998657
577	11.7459	12.7824	8.02781	8.61636	11.3254	11.9655	9.60056	11.8369	10.2006	11.2143	12.3156	10.8299	8.42007	8.35913	11.4775	12.664	9.78429	9.87149	5.02231	4.99684	5.4411	6.37058	4.76819	6.30457	3.76199	4.90213	1.53158	5.89988	7.35732	7.16769	9.0361	16.588	14.4286	12.6518	10.4198	10.832	12.2081	14.7399	14.0948	15.4359	11.5126	11.3087		1.40653	1.31304	0.395525	0.456059	0.601216	0.110898
578	11.7583	12.7981	8.0484	8.63538	11.3404	11.9778	9.64915	11.8955	10.2494	11.2654	12.3766	10.8836	8.44326	8.37825	11.5015	12.688	9.81065	9.89934	5.04602	5.01727	5.4819	6.41298	4.80467	6.3534	3.7972	4.94038	1.53871	5.92211	7.38596	7.19855	9.08367	16.656	14.5065	12.7215	10.4711	10.907	12.2184	14.7521	14.1159	15.4587	11.5199	11.3144		1.45242	1.35679	0.412951	0.476303	0.620199	0.122143
579	11.7725	12.8162	8.06986	8.65524	11.3578	11.9919	9.69827	11.9549	10.2996	11.3172	12.4379	10.9378	8.46814	8.39878	11.5268	12.7147	9.83844	9.92824	5.07029	5.03823	5.5225	6.456	4.84154	6.40237	3.83236	4.97844	1.54641	5.94513	7.41493	7.22967	9.13152	16.7253	14.5846	12.792	10.5228	10.9817	12.2299	14.7658	14.1386	15.4823	11.5287	11.3216		1.49722	1.39945	0.430442	0.496015	0.638565	0.133496
580	11.7853	12.8333	8.09043	8.67377	11.3743	12.0048	9.74648	12.0134	10.3491	11.3683	12.4976	10.9908	8.49207	8.41847	11.5513	12.741	9.86539	9.95622	5.09404	5.05863	5.56246	6.49872	4.87809	6.45079	3.86683	5.01559	1.55404	5.96757	7.44256	7.25962	9.17872	16.7926	14.6607	12.8603	10.5732	11.055	12.2399	14.7783	14.16	15.5039	11.5361	11.3273		1.54244	1.44254	0.448335	0.51599	0.656954	0.145427
581	11.7936	12.8458	8.1084	8.68889	11.3867	12.0137	9.79229	12.0693	10.3957	11.417	12.5539	11.0408	8.51251	8.4351	11.5727	12.7637	9.88923	9.98129	5.11617	5.07737	5.60136	6.54009	4.91358	6.49798	3.90005	5.05118	1.56096	5.98803	7.46734	7.28704	9.22423	16.8546	14.7327	12.924	10.6208	11.1263	12.2457	14.7867	14.1769	15.5207	11.5393	11.3288		1.58954	1.48744	0.466919	0.536985	0.67599	0.158366
582	11.7981	12.8547	8.12427	8.70125	11.3959	12.0193	9.83607	12.1232	10.4399	11.4637	12.6074	11.0883	8.53025	8.44933	11.5915	12.7836	9.91059	10.004	5.13701	5.09476	5.63933	6.58033	4.94818	6.54412	3.93222	5.08544	1.56732	6.00689	7.48983	7.31243	9.26824	16.9124	14.8014	12.9838	10.6661	11.1958	12.2479	14.7918	14.19	15.5336	11.539	11.3268		1.63798	1.53367	0.48606	0.558744	0.695476	0.172146
583	11.8	12.861	8.13855	8.71154	11.4028	12.0225	9.87819	12.1752	10.4824	11.5087	12.6586	11.1338	8.54607	8.46181	11.6085	12.8013	9.93009	10.025	5.15687	5.11113	5.67647	6.61965	4.98208	6.58939	3.96356	5.11861	1.57329	6.02453	7.51062	7.33625	9.31091	16.967	14.8675	13.041	10.7094	11.2637	12.2475	14.7942	14.2002	15.5435	11.536	11.3222		1.68726	1.58072	0.505624	0.581008	0.715217	0.186599
584	11.8	12.8655	8.15174	8.72041	11.4083	12.0241	9.91904	12.2258	10.5235	11.5523	12.7081	11.1778	8.56077	8.47319	11.6242	12.8177	9.94838	10.0448	5.17608	5.1268	5.7129	6.65826	5.01544	6.63397	3.9943	5.15092	1.57903	6.04131	7.5303	7.35897	9.35244	17.0194	14.9317	13.0964	10.7513	11.3303	12.2452	14.7947	14.2084	15.5511	11.5313	11.3159		1.73686	1.6281	0.525478	0.603519	0.735014	0.201558
585	11.7992	12.8692	8.16437	8.72854	11.4132	12.0247	9.95898	12.2753	10.564	11.5949	12.7564	11.2206	8.57515	8.48413	11.639	12.8336	9.96608	10.0639	5.19495	5.14209	5.74872	6.69637	5.04843	6.67803	4.02464	5.1826	1.5847	6.05759	7.54943	7.38108	9.393	17.0707	14.9949	13.151	10.7922	11.3958	12.2419	14.794	14.2154	15.5573	11.5256	11.3086		1.78626	1.6753	0.545489	0.626021	0.754671	0.216855
586	11.7983	12.873	8.17693	8.73659	11.4184	12.0253	9.99839	12.3241	10.6043	11.6367	12.8041	11.2629	8.58998	8.49528	11.6537	12.8496	9.98382	10.0829	5.21379	5.15731	5.78405	6.73419	5.08123	6.72175	4.05481	5.2139	1.59047	6.07377	7.56859	7.40304	9.43278	17.1221	15.0578	13.2059	10.8325	11.4604	12.2383	14.7929	14.2219	15.5629	11.5199	11.3011		1.83494	1.72182	0.565522	0.648254	0.773991	0.232322
587	11.7985	12.8778	8.18994	8.74525	11.4249	12.0266	10.0377	12.3725	10.645	11.6782	12.8517	11.305	8.60606	8.5073	11.6688	12.8667	10.0022	10.1024	5.23293	5.17278	5.81901	6.77192	5.11401	6.76531	4.08502	5.24504	1.59649	6.09019	7.58837	7.42533	9.47195	17.1744	15.1211	13.262	10.8728	11.5244	12.2353	14.792	14.2289	15.5687	11.5148	11.2944		1.8824	1.76716	0.585445	0.669962	0.792776	0.247794
588	11.8005	12.8846	8.20392	8.75516	11.4335	12.0293	10.0771	12.4209	10.6866	11.7197	12.8998	11.3473	8.62418	8.52083	11.6849	12.8855	10.022	10.123	5.25269	5.18883	5.8537	6.80979	5.14694	6.80888	4.11549	5.27626	1.60293	6.10725	7.60935	7.44842	9.51069	17.2289	15.1857	13.3204	10.9134	11.588	12.2336	14.7921	14.2372	15.5756	11.5113	11.2891		1.92811	1.81083	0.605123	0.690886	0.81083	0.263101
589	11.8016	12.8906	8.21727	8.76417	11.4419	12.031	10.1151	12.4675	10.7274	11.7598	12.9457	11.3881	8.64165	8.5338	11.6997	12.9037	10.0409	10.1422	5.2718	5.20421	5.88724	6.84694	5.17923	6.85122	4.14535	5.30643	1.60922	6.12346	7.6295	7.47044	9.54805	17.2815	15.248	13.3772	10.9523	11.6493	12.2302	14.7901	14.2435	15.5799	11.5066	11.2823		1.97341	1.85417	0.625089	0.711678	0.828549	0.278785
590	11.7988	12.893	8.22838	8.77007	11.4473	12.0288	10.1498	12.5107	10.7655	11.7973	12.987	11.4254	8.65579	8.54413	11.7111	12.9187	10.0569	10.1578	5.28905	5.21771	5.91892	6.88259	5.21015	6.89129	4.17378	5.33453	1.6148	6.13744	7.64684	7.48957	9.5832	17.3283	15.3048	13.4288	10.9875	11.7065	12.2223	14.7833	14.245	15.5782	11.4977	11.271		2.0198	1.89865	0.645853	0.733064	0.84642	0.295402
591	11.793	12.8926	8.23772	8.77351	11.4506	12.0237	10.1821	12.5511	10.8015	11.8328	13.0247	11.4599	8.66742	8.55239	11.7199	12.9312	10.0706	10.1707	5.30486	5.22977	5.9491	6.91705	5.23999	6.92959	4.20106	5.36098	1.61985	6.14969	7.66197	7.50646	9.6165	17.3707	15.3574	13.4763	11.0198	11.7606	12.2107	14.7726	14.2425	15.5718	11.4856	11.2561		2.06696	1.94396	0.667254	0.754903	0.864382	0.31281
592	11.785	12.8901	8.24575	8.77511	11.4522	12.0164	10.2125	12.5894	10.836	11.8665	13.0597	11.4923	8.67734	8.55919	11.7268	12.9421	10.0828	10.1816	5.31967	5.24078	5.97816	6.95059	5.26905	6.96662	4.2275	5.38617	1.62455	6.16068	7.67551	7.52172	9.64832	17.4099	15.4069	13.521	11.05	11.8124	12.1965	14.7591	14.2371	15.562	11.4711	11.2386		2.11457	1.98979	0.689129	0.777054	0.882374	0.330866
593	11.7756	12.8864	8.25292	8.77552	11.4528	12.0078	10.2417	12.6264	10.8694	11.8991	13.093	11.5233	8.68636	8.56513	11.7325	12.952	10.0939	10.1914	5.33388	5.25116	6.00647	6.98352	5.29762	7.0029	4.25336	5.41053	1.62907	6.1709	7.68808	7.53597	9.67903	17.4472	15.4546	13.5641	11.0786	11.8626	12.1807	14.7438	14.2299	15.55	11.455	11.2195		2.16235	2.03583	0.711317	0.799374	0.900336	0.349426
594	11.7656	12.8821	8.25968	8.77538	11.4532	11.9985	10.2703	12.6626	10.9023	11.9309	13.1255	11.5535	8.6953	8.57079	11.7378	12.9617	10.1046	10.2008	5.34793	5.26133	6.03439	7.01614	5.32597	7.03892	4.27894	5.43445	1.63359	6.18085	7.7003	7.54984	9.70901	17.4838	15.5016	13.6067	11.1066	11.9121	12.1641	14.7277	14.2218	15.537	11.4383	11.1997		2.20997	2.08175	0.733656	0.821723	0.918207	0.368347
595	11.7558	12.878	8.26651	8.77532	11.4538	11.9895	10.2989	12.6988	10.9353	11.9624	13.1582	11.5836	8.70496	8.57678	11.7434	12.9719	10.1157	10.2108	5.36222	5.2717	6.0623	7.04873	5.35441	7.07519	4.30453	5.45835	1.63829	6.191	7.71279	7.56395	9.73862	17.521	15.5493	13.65	11.1347	11.9617	12.1478	14.7119	14.2139	15.5244	11.4217	11.1803		2.25713	2.12726	0.755983	0.843958	0.935926	0.387487
596	11.7471	12.8748	8.27386	8.77598	11.4553	11.9815	10.3282	12.7357	10.9689	11.9941	13.192	11.6143	8.71616	8.58369	11.7501	12.9833	10.1276	10.2221	5.37718	5.28267	6.09057	7.08159	5.38323	7.11221	4.33042	5.48263	1.64335	6.20185	7.72615	7.57893	9.76822	17.56	15.5987	13.6953	11.1636	12.0122	12.1328	14.6975	14.2072	15.5133	11.4061	11.1621		2.30352	2.17202	0.778137	0.865939	0.953434	0.406701
597	11.7402	12.8735	8.28218	8.77799	11.4585	11.9753	10.3587	12.7739	11.0036	12.0263	13.2279	11.6462	8.7297	8.59212	11.7586	12.9966	10.1412	10.2355	5.39324	5.29466	6.11956	7.11502	5.4127	7.15049	4.35689	5.50771	1.64894	6.21387	7.74101	7.59539	9.7982	17.6022	15.6512	13.7437	11.1941	12.0645	12.1201	14.6854	14.2027	15.505	11.3924	11.1462		2.34884	2.21574	0.799955	0.887523	0.970669	0.425848
598	11.7359	12.8745	8.29194	8.78201	11.4638	11.9717	10.3913	12.8142	11.0401	12.0596	13.2668	11.68	8.7464	8.60266	11.7696	13.0126	10.1569	10.2519	5.4108	5.30809	6.14965	7.1493	5.44314	7.19053	4.38423	5.53399	1.65525	6.22757	7.75798	7.61396	9.82891	17.6487	15.7079	13.7964	11.2268	12.1194	12.1105	14.6767	14.2014	15.5008	11.3814	11.1335		2.39277	2.25809	0.821276	0.908569	0.98757	0.444784
599	11.7312	12.8754	8.30147	8.78552	11.4694	11.9672	10.4239	12.8542	11.0768	12.0927	13.3057	11.7136	8.76413	8.61343	11.7804	13.0291	10.1728	10.2684	5.42861	5.32153	6.17933	7.18346	5.47368	7.23071	4.41142	5.56002	1.66166	6.24133	7.77529	7.63243	9.8586	17.6965	15.7652	13.8504	11.2595	12.1741	12.101	14.6678	14.1999	15.4965	11.3705	11.1209		2.43602	2.29974	0.842648	0.929363	1.00416	0.463984
600	11.7231	12.8733	8.3091	8.78613	11.473	11.9587	10.4544	12.8916	11.1125	12.1241	13.3414	11.7447	8.78049	8.62245	11.7883	13.0437	10.1868	10.2823	5.4453	5.33354	6.20717	7.21651	5.50343	7.26934	4.43745	5.58432	1.66757	6.25351	7.79105	7.64861	9.88566	17.7418	15.8195	13.9025	11.2898	12.2259	12.0881	14.6551	14.1949	15.4877	11.357	11.1053		2.47939	2.34149	0.864622	0.950259	1.02054	0.483928
601	11.7126	12.8691	8.31532	8.7846	11.4752	11.9472	10.4833	12.9269	11.1472	12.1541	13.3746	11.774	8.79593	8.63022	11.7941	13.0569	10.1994	10.2944	5.46119	5.34453	6.23362	7.24868	5.53259	7.30684	4.46261	5.60733	1.67314	6.26453	7.80566	7.66311	9.91069	17.7853	15.8715	13.9531	11.3181	12.2755	12.0728	14.6396	14.1873	15.4756	11.3415	11.0873		2.52278	2.38325	0.88704	0.971217	1.03672	0.504481
602	11.7005	12.8635	8.32061	8.78172	11.4765	11.9339	10.5112	12.9609	11.1812	12.183	13.4061	11.8019	8.81089	8.63722	11.7986	13.0693	10.2111	10.3053	5.4766	5.35488	6.25915	7.28024	5.56133	7.34363	4.48717	5.62945	1.67854	6.27483	7.81953	7.67655	9.9343	17.8276	15.922	14.0028	11.3451	12.3236	12.0559	14.6223	14.1779	15.4613	11.3247	11.0679		2.56606	2.42491	0.909744	0.992199	1.05275	0.525505
603	11.6877	12.8573	8.32545	8.77823	11.4775	11.9199	10.5384	12.9941	11.2147	12.2111	13.4369	11.8291	8.82583	8.64394	11.8026	13.0815	10.2225	10.3158	5.49181	5.36499	6.28424	7.31144	5.58985	7.38013	4.51142	5.6511	1.68395	6.28483	7.83308	7.68954	9.9571	17.8692	15.9719	14.0522	11.3714	12.371	12.0384	14.6042	14.1677	15.4461	11.3072	11.0479		2.60911	2.46636	0.932574	1.01316	1.06866	0.546865
604	11.6753	12.8513	8.33034	8.77492	11.4787	11.9063	10.5654	13.0272	11.248	12.2387	13.4676	11.856	8.84118	8.65087	11.8069	13.0939	10.234	10.3268	5.50716	5.37525	6.30936	7.34254	5.61834	7.41677	4.53565	5.67271	1.68952	6.29494	7.84672	7.70272	9.97968	17.911	16.022	14.1018	11.3975	12.4183	12.021	14.5862	14.1576	15.431	11.2898	11.0281		2.65181	2.50751	0.955372	1.03407	1.08447	0.568423
605	11.6641	12.8463	8.33575	8.77255	11.4805	11.8943	10.5928	13.0606	11.2813	12.266	13.4991	11.8832	8.85738	8.65849	11.8122	13.1072	10.2462	10.3389	5.52294	5.38605	6.33496	7.37379	5.64698	7.45397	4.56015	5.69468	1.69543	6.3056	7.86085	7.71669	10.0027	17.9533	16.0732	14.1521	11.4242	12.4662	12.0047	14.5696	14.1484	15.4173	11.2729	11.0093		2.69405	2.54825	0.97798	1.05489	1.10022	0.590044
606	11.655	12.8431	8.34216	8.77189	11.4835	11.885	10.621	13.0952	11.3148	12.2934	13.5322	11.9113	8.87489	8.6673	11.8195	13.1219	10.2596	10.3528	5.53946	5.39778	6.36152	7.40545	5.67598	7.49215	4.58518	5.71744	1.70185	6.31722	7.87588	7.73208	10.0266	17.9968	16.1261	14.2037	11.4518	12.5155	11.9904	14.5551	14.1411	15.4061	11.2573	10.9923		2.7357	2.58848	1.00024	1.07556	1.11595	0.611591
607	11.649	12.8424	8.35007	8.77371	11.4882	11.8795	10.6505	13.1314	11.3488	12.3211	13.5677	11.9408	8.89414	8.67778	11.8294	13.1384	10.2746	10.3695	5.55703	5.41084	6.38951	7.43777	5.70552	7.53173	4.61106	5.74139	1.70893	6.33024	7.89224	7.74949	10.0522	18.0422	16.1818	14.2572	11.4811	12.5669	11.9788	14.5439	14.1367	15.3985	11.2437	10.978		2.77665	2.62809	1.02199	1.09607	1.13167	0.632928
608	11.6443	12.8429	8.3586	8.7766	11.4937	11.8759	10.6805	13.1683	11.3828	12.3485	13.6043	11.9704	8.91484	8.68942	11.8406	13.1561	10.2906	10.3878	5.57527	5.42462	6.41795	7.47019	5.73533	7.57223	4.63726	5.76585	1.71645	6.34393	7.90936	7.76795	10.0782	18.0893	16.2394	14.3125	11.5115	12.6196	11.9685	14.5341	14.1334	15.3928	11.2307	10.9649		2.81662	2.66681	1.04333	1.11621	1.14714	0.654197
609	11.6388	12.8427	8.36661	8.77873	11.4988	11.8715	10.7101	13.2044	11.4164	12.3749	13.6402	11.9987	8.93635	8.70135	11.8512	13.1737	10.3063	10.4063	5.59358	5.43826	6.44565	7.50203	5.76501	7.61289	4.66313	5.78987	1.72406	6.35732	7.92642	7.78609	10.1032	18.1371	16.2976	14.3688	11.542	12.6721	11.9575	14.5234	14.1292	15.3863	11.2168	10.9513		2.85547	2.70448	1.06446	1.13587	1.1621	0.675636
610	11.6327	12.842	8.3742	8.78024	11.5035	11.8665	10.7394	13.2399	11.4496	12.4003	13.6757	12.0258	8.95861	8.71357	11.8614	13.1911	10.3218	10.4249	5.61197	5.45181	6.47271	7.53337	5.79458	7.65369	4.68872	5.8135	1.73178	6.37046	7.94346	7.80399	10.1272	18.1858	16.3564	14.4262	11.5724	12.7245	11.9459	14.512	14.1242	15.3792	11.2021	10.9373		2.89335	2.74123	1.08542	1.15512	1.17663	0.697254
611	11.6261	12.8409	8.38144	8.78127	11.508	11.8611	10.7683	13.2748	11.4824	12.4248	13.7106	12.0519	8.98153	8.72604	11.8713	13.2086	10.3371	10.4438	5.63044	5.4653	6.49924	7.56427	5.82405	7.69462	4.71407	5.8368	1.7396	6.38342	7.96047	7.8217	10.1503	18.235	16.4156	14.4844	11.6029	12.7767	11.9339	14.5	14.1185	15.3716	11.1868	10.9229		2.93037	2.77717	1.10625	1.17403	1.19079	0.719058
612	11.6192	12.8395	8.38842	8.78194	11.5123	11.8555	10.7969	13.3092	11.5149	12.4485	13.7452	12.0771	9.00506	8.73875	11.881	13.2262	10.3524	10.4629	5.64899	5.47876	6.52535	7.5948	5.85343	7.73566	4.73924	5.85982	1.74753	6.39624	7.97748	7.8393	10.1727	18.2846	16.4752	14.5432	11.6333	12.8288	11.9215	14.4874	14.1123	15.3636	11.1709	10.9082		2.96666	2.81242	1.12698	1.19266	1.20463	0.741056
613	11.612	12.8379	8.39522	8.78241	11.5165	11.8498	10.8252	13.3432	11.547	12.4715	13.7795	12.1016	9.02912	8.75167	11.8906	13.2438	10.3676	10.4822	5.66763	5.49224	6.55115	7.62504	5.88274	7.7768	4.76426	5.88262	1.7556	6.409	7.9945	7.85687	10.1945	18.3346	16.5351	14.6026	11.6636	12.8807	11.9089	14.4746	14.1057	15.3554	11.1546	10.8933		3.00234	2.84711	1.14764	1.21108	1.21822	0.763256
614	11.6048	12.8362	8.40192	8.78281	11.5208	11.8441	10.8533	13.3768	11.5788	12.4938	13.8135	12.1255	9.05363	8.76478	11.9002	13.2616	10.3829	10.5017	5.68635	5.50577	6.57675	7.65506	5.91198	7.81803	4.7892	5.90525	1.7638	6.42174	8.01155	7.87446	10.2159	18.3847	16.5952	14.6624	11.6937	12.9325	11.8961	14.4615	14.0987	15.3469	11.138	10.8784		3.03755	2.88134	1.16827	1.22936	1.23162	0.785666
615	11.5978	12.8347	8.40862	8.78326	11.5252	11.8388	10.8811	13.4101	11.6104	12.5155	13.8475	12.1491	9.07852	8.77808	11.91	13.2796	10.3983	10.5215	5.70518	5.51939	6.60226	7.68494	5.94116	7.85932	4.81408	5.92777	1.77214	6.43452	8.02864	7.89215	10.2369	18.4348	16.6554	14.7225	11.7235	12.9841	11.8833	14.4485	14.0917	15.3384	11.1212	10.8634		3.07239	2.91525	1.1889	1.24757	1.2449	0.808295
616	11.591	12.8334	8.41539	8.78392	11.5298	11.8338	10.9086	13.4432	11.6417	12.5367	13.8813	12.1724	9.10373	8.79152	11.92	13.2979	10.4138	10.5416	5.72409	5.53312	6.6278	7.71473	5.97031	7.90067	4.83897	5.95022	1.78064	6.44739	8.0458	7.91001	10.2576	18.4849	16.7156	14.7826	11.7532	13.0356	11.8705	14.4355	14.0846	15.33	11.1045	10.8486		3.107	2.94894	1.20957	1.26577	1.25811	0.831149
617	11.5847	12.8324	8.42232	8.78492	11.5347	11.8295	10.9361	13.4761	11.6729	12.5576	13.9152	12.1957	9.12918	8.80509	11.9305	13.3165	10.4295	10.5619	5.74311	5.54702	6.65346	7.74451	5.99942	7.94206	4.8639	5.97267	1.78929	6.46043	8.06303	7.92811	10.2783	18.5346	16.7759	14.8427	11.7825	13.087	11.858	14.4228	14.0777	15.3218	11.0878	10.834		3.14151	2.98254	1.2303	1.28404	1.27133	0.854237
618	11.5789	12.8319	8.42948	8.7864	11.54	11.826	10.9633	13.509	11.7038	12.5781	13.9492	12.219	9.1548	8.81878	11.9415	13.3354	10.4455	10.5826	5.76223	5.5611	6.67936	7.77436	6.02852	7.98348	4.88894	5.99517	1.79812	6.47367	8.08035	7.94652	10.2989	18.584	16.836	14.9025	11.8114	13.1381	11.8457	14.4104	14.071	15.3138	11.0714	10.8198		3.17603	3.01616	1.25113	1.30244	1.28461	0.877567
619	11.5739	12.8319	8.43697	8.78848	11.5458	11.8234	10.9904	13.5418	11.7347	12.5983	13.9834	12.2425	9.18051	8.83255	11.9531	13.3548	10.4617	10.6035	5.78146	5.57542	6.70561	7.80434	6.05761	8.02491	4.91411	6.01777	1.80713	6.48718	8.09779	7.9653	10.3197	18.6328	16.8959	14.962	11.8399	13.1891	11.8338	14.3986	14.0646	15.3062	11.0553	10.8059		3.2107	3.04992	1.2721	1.32103	1.29801	0.901146
620	11.5698	12.8327	8.44487	8.79132	11.5522	11.822	11.0175	13.5747	11.7654	12.6184	14.0179	12.2664	9.20625	8.8464	11.9655	13.3746	10.4784	10.6248	5.80081	5.59	6.73232	7.83454	6.0867	8.06633	4.93947	6.04053	1.81633	6.50102	8.11535	7.98454	10.3407	18.6809	16.9556	15.021	11.868	13.24	11.8225	14.3874	14.0588	15.2991	11.0397	10.7925		3.24563	3.08395	1.29324	1.3399	1.3116	0.924984
621	11.5668	12.8344	8.45326	8.79505	11.5593	11.8219	11.0444	13.6077	11.796	12.6384	14.0527	12.2909	9.23194	8.86029	11.9787	13.395	10.4955	10.6465	5.82026	5.60489	6.7596	7.86501	6.11581	8.10774	4.96508	6.06349	1.82572	6.51524	8.13304	8.00429	10.362	18.7281	17.0149	15.0794	11.8955	13.2906	11.8118	14.3771	14.0537	15.2927	11.0248	10.7797		3.28095	3.11836	1.31458	1.35909	1.32545	0.949087
622	11.5649	12.837	8.46222	8.7998	11.5671	11.8232	11.0713	13.641	11.8266	12.6583	14.088	12.316	9.25752	8.87421	11.993	13.4159	10.5131	10.6685	5.83984	5.62011	6.78757	7.89582	6.14495	8.14912	4.99096	6.08672	1.83532	6.52991	8.1509	8.02462	10.3838	18.7744	17.0738	15.1369	11.9225	13.3411	11.8018	14.3677	14.0493	15.287	11.0106	10.7676		3.31679	3.15326	1.33616	1.37869	1.3396	0.973463
623	11.5645	12.8406	8.47185	8.80571	11.5758	11.8262	11.0982	13.6745	11.8572	12.6784	14.1238	12.342	9.28291	8.88814	12.0084	13.4375	10.5312	10.6908	5.85953	5.63571	6.81631	7.92706	6.17413	8.19045	5.01718	6.11028	1.84513	6.54506	8.16893	8.04562	10.4063	18.8196	17.1322	15.1935	11.9489	13.3915	11.7927	14.3595	14.0459	15.2821	10.9972	10.7563		3.35327	3.18879	1.358	1.39876	1.35413	0.998121
624	11.5655	12.8456	8.48221	8.81292	11.5855	11.831	11.1251	13.7083	11.8878	12.6986	14.1602	12.3691	9.30803	8.90205	12.025	13.4597	10.5499	10.7136	5.87935	5.65172	6.84596	7.9588	6.20336	8.23172	5.04378	6.1342	1.85516	6.56078	8.18715	8.06734	10.4294	18.8635	17.19	15.2489	11.9746	13.4416	11.7846	14.3524	14.0434	15.2782	10.9849	10.7458		3.39051	3.22505	1.38015	1.41936	1.3691	1.02307
625	11.5683	12.8518	8.4934	8.82157	11.5963	11.8378	11.152	13.7426	11.9185	12.719	14.1973	12.3972	9.33283	8.91592	12.043	13.4827	10.5692	10.7368	5.8993	5.66817	6.87662	7.99109	6.23265	8.27291	5.0708	6.15855	1.86543	6.5771	8.20557	8.08985	10.4534	18.9061	17.2471	15.3032	11.9996	13.4916	11.7775	14.3468	14.0422	15.2754	10.9737	10.7364		3.42865	3.26216	1.40264	1.44057	1.38457	1.04831
626	11.5729	12.8596	8.50553	8.83158	11.6084	11.8471	11.179	13.7772	11.9488	12.7392	14.2355	12.4261	9.35833	8.93014	12.0626	13.5067	10.5894	10.761	5.9196	5.6852	6.90835	8.02383	6.26226	8.31476	5.09819	6.18348	1.87612	6.59398	8.22446	8.11349	10.4779	18.9483	17.3052	15.3574	12.0242	13.5423	11.7716	14.3423	14.0421	15.274	10.963	10.7278		3.46659	3.29941	1.42504	1.4618	1.40006	1.07377
627	11.5792	12.8688	8.51853	8.84267	11.6222	11.8591	11.2061	13.8121	11.9786	12.7587	14.2749	12.4551	9.38537	8.945	12.0838	13.532	10.6104	10.7868	5.94037	5.70281	6.94101	8.0568	6.29232	8.35779	5.12584	6.20899	1.88733	6.61127	8.24396	8.13833	10.5022	18.9913	17.3655	15.4127	12.0486	13.5943	11.7667	14.3386	14.0429	15.2739	10.9519	10.7198		3.5034	3.33613	1.44701	1.48252	1.41513	1.09938
628	11.5869	12.8791	8.53221	8.85466	11.6371	11.8731	11.2331	13.8472	12.0079	12.7777	14.3152	12.4841	9.41355	8.96033	12.1063	13.5582	10.632	10.8139	5.96152	5.7209	6.97443	8.08995	6.3227	8.40167	5.15369	6.23494	1.89897	6.62894	8.26391	8.16414	10.5265	19.0347	17.4274	15.4686	12.0728	13.6472	11.7628	14.3356	14.0444	15.275	10.9408	10.7123		3.53941	3.37247	1.46869	1.50293	1.42993	1.12516
629	11.5956	12.8903	8.5464	8.86737	11.6529	11.8887	11.26	13.8824	12.0369	12.7962	14.356	12.5133	9.44246	8.97597	12.1298	13.5851	10.6541	10.8418	5.98293	5.73935	7.00842	8.12324	6.35326	8.44607	5.1817	6.26118	1.91092	6.6469	8.28417	8.19065	10.5508	19.0781	17.4901	15.5249	12.0967	13.7005	11.7595	14.3333	14.0465	15.2768	10.9297	10.7054		3.57495	3.40862	1.49023	1.52321	1.4446	1.15113
630	11.6051	12.9021	8.5609	8.88064	11.6693	11.9053	11.2868	13.9176	12.0656	12.8143	14.3971	12.5426	9.4717	8.99175	12.154	13.6125	10.6765	10.8702	6.00448	5.75806	7.04279	8.15662	6.38387	8.49067	5.20982	6.28755	1.92309	6.66512	8.30457	8.2176	10.5751	19.1211	17.5531	15.581	12.1203	13.754	11.7567	14.3314	14.049	15.2792	10.9188	10.6987		3.61034	3.44474	1.51179	1.54354	1.45929	1.17733
631	11.6151	12.9141	8.57553	8.89427	11.6859	11.9224	11.3135	13.9526	12.0942	12.8321	14.4382	12.5721	9.50087	9.00751	12.1785	13.6401	10.6991	10.8987	6.02607	5.7769	7.07737	8.19005	6.41439	8.53514	5.238	6.3139	1.93537	6.68353	8.32497	8.24474	10.5995	19.1635	17.6155	15.6366	12.1435	13.807	11.7542	14.33	14.0518	15.2818	10.9082	10.6924		3.64592	3.481	1.53349	1.56411	1.47413	1.20378
632	11.6252	12.9262	8.59012	8.9081	11.7023	11.9395	11.3399	13.9875	12.1227	12.8498	14.4789	12.6018	9.52955	9.02308	12.2032	13.6677	10.7217	10.9271	6.04758	5.79577	7.11196	8.22346	6.44467	8.57916	5.26619	6.34008	1.94765	6.70208	8.34521	8.2718	10.6239	19.2048	17.6768	15.6913	12.1662	13.8593	11.7517	14.3289	14.0546	15.2843	10.8982	10.6863		3.68201	3.51758	1.5555	1.58509	1.48928	1.2305
633	11.6351	12.938	8.60446	8.92194	11.7182	11.9561	11.366	14.0221	12.1513	12.8674	14.519	12.6316	9.55736	9.03829	12.2277	13.6951	10.7441	10.9549	6.0689	5.81454	7.14639	8.25682	6.47458	8.62239	5.29434	6.36595	1.95983	6.7207	8.36513	8.29853	10.6484	19.2447	17.7363	15.7447	12.1885	13.9104	11.7492	14.3281	14.0573	15.2865	10.8887	10.6804		3.71896	3.55466	1.57795	1.60667	1.50486	1.25753
634	11.6444	12.9492	8.61839	8.93563	11.7334	11.9715	11.3918	14.0562	12.1802	12.8849	14.5582	12.6617	9.58388	9.05298	12.2517	13.7219	10.7661	10.9818	6.08991	5.83312	7.18047	8.29008	6.50398	8.66452	5.32241	6.39134	1.9718	6.73935	8.3846	8.32467	10.6731	19.2828	17.7933	15.7963	12.2102	13.9599	11.7464	14.3275	14.0598	15.288	10.8801	10.6745		3.75707	3.59239	1.601	1.62903	1.52102	1.28488
635	11.653	12.9595	8.63171	8.94897	11.7474	11.9853	11.4172	14.0899	12.2093	12.9027	14.596	12.692	9.60872	9.06699	12.2748	13.748	10.7877	11.0075	6.11051	5.85138	7.21401	8.32319	6.53274	8.70521	5.35035	6.41611	1.98347	6.75796	8.40344	8.34997	10.6979	19.3187	17.8471	15.8458	12.2312	14.0074	11.7432	14.3269	14.0619	15.2885	10.8724	10.6687		3.79669	3.63095	1.62478	1.65235	1.53791	1.31259
636	11.6618	12.9701	8.64453	8.96258	11.7613	12.0001	11.4424	14.1238	12.2386	12.9202	14.6342	12.7235	9.63286	9.08039	12.2986	13.7746	10.8093	11.0334	6.13093	5.86987	7.24801	8.35639	6.56112	8.74518	5.37789	6.44029	1.99514	6.777	8.42181	8.37522	10.7233	19.3528	17.8992	15.8938	12.2509	14.0535	11.7405	14.3281	14.0648	15.2896	10.8659	10.6637		3.83642	3.66959	1.64864	1.67607	1.55493	1.34017
637	11.672	12.9819	8.65715	8.97707	11.7764	12.0181	11.4675	14.1584	12.268	12.9373	14.674	12.757	9.65748	9.09347	12.3243	13.8027	10.8316	11.0608	6.15147	5.88909	7.28333	8.38992	6.5895	8.78529	5.40496	6.46412	2.00716	6.79687	8.44003	8.40128	10.7495	19.3857	17.9517	15.941	12.2687	14.0994	11.7396	14.3323	14.0696	15.2926	10.8606	10.6604		3.87494	3.70764	1.67196	1.69958	1.57153	1.36728
638	11.6833	12.9948	8.66972	8.99235	11.7925	12.0386	11.4925	14.1935	12.2974	12.9541	14.7151	12.7919	9.68241	9.10636	12.3515	13.8319	10.8545	11.0895	6.17212	5.9089	7.31967	8.42373	6.61786	8.82549	5.43175	6.48772	2.01947	6.81741	8.45816	8.42799	10.7766	19.4175	18.0041	15.9875	12.2851	14.145	11.7399	14.3388	14.0758	15.297	10.8561	10.6584		3.91276	3.74536	1.69499	1.72306	1.5879	1.39417
639	11.6955	13.0085	8.68239	9.0083	11.8091	12.0607	11.5175	14.2289	12.3269	12.9707	14.7568	12.8278	9.7075	9.11918	12.3798	13.8621	10.8778	11.1188	6.1929	5.92911	7.35667	8.45779	6.6462	8.8657	5.45845	6.51125	2.03202	6.83846	8.47631	8.45517	10.804	19.4485	18.0565	16.0335	12.3007	14.1903	11.7411	14.3469	14.083	15.3023	10.8525	10.6573		3.95037	3.78303	1.71797	1.74667	1.60427	1.42106
640	11.7085	13.0227	8.6953	9.02481	11.8262	12.0837	11.5425	14.2645	12.3564	12.9873	14.7988	12.8641	9.7326	9.13208	12.4087	13.8927	10.9014	11.1485	6.21378	5.94958	7.39403	8.49205	6.67454	8.90585	5.48528	6.53484	2.04473	6.85985	8.49454	8.48265	10.8318	19.4789	18.1084	16.079	12.316	14.2353	11.7428	14.3556	14.0907	15.308	10.8494	10.6567		3.98826	3.82093	1.74113	1.77057	1.62083	1.44821
641	11.7219	13.0373	8.70859	9.04176	11.8434	12.1066	11.5675	14.2999	12.3861	13.0039	14.8404	12.9003	9.75754	9.14518	12.4379	13.9234	10.9253	11.178	6.23478	5.97014	7.4314	8.52644	6.70286	8.94588	5.51243	6.55864	2.05753	6.88141	8.51295	8.51026	10.8597	19.509	18.1597	16.1242	12.3314	14.2801	11.7445	14.3643	14.0985	15.3137	10.8467	10.6563		4.02694	3.85932	1.76474	1.79494	1.63779	1.47584
642	11.7355	13.0519	8.72241	9.05906	11.8605	12.1288	11.5925	14.3351	12.4157	13.0206	14.8813	12.936	9.78218	9.15862	12.4668	13.954	10.9493	11.2069	6.25589	5.99062	7.46845	8.56094	6.73116	8.98572	5.5401	6.58278	2.07038	6.90298	8.53162	8.53783	10.8873	19.539	18.2101	16.1691	12.3474	14.3246	11.746	14.3723	14.1058	15.3189	10.8442	10.6557		4.06689	3.89849	1.78902	1.81994	1.65535	1.50421
643	11.7492	13.0664	8.7369	9.07657	11.8773	12.1493	11.6175	14.3698	12.4455	13.0377	14.9209	12.9705	9.80636	9.17254	12.495	13.9839	10.9733	11.2349	6.2771	6.01086	7.50487	8.5955	6.75945	9.0253	5.5685	6.6074	2.0832	6.92441	8.55063	8.56519	10.9147	19.5691	18.2595	16.2138	12.3645	14.3687	11.7468	14.3787	14.1123	15.3231	10.8416	10.6544		4.10861	3.93871	1.81422	1.84573	1.67374	1.53355
644	11.7626	13.0804	8.7522	9.09421	11.8933	12.1675	11.6426	14.4038	12.4754	13.0552	14.9587	13.0034	9.82993	9.18705	12.5221	14.013	10.9972	11.2614	6.29842	6.03071	7.54031	8.63006	6.78772	9.06456	5.59781	6.63265	2.09593	6.94552	8.57006	8.59216	10.9415	19.5995	18.3076	16.2584	12.3832	14.4126	11.7466	14.3828	14.1174	15.3258	10.8389	10.6522		4.15259	3.98025	1.84058	1.87247	1.69314	1.5641
645	11.776	13.0936	8.76773	9.11204	11.909	12.1847	11.6665	14.4357	12.5047	13.0718	14.9944	13.0351	9.85158	9.20115	12.5486	14.0408	11.0206	11.286	6.31922	6.05	7.5751	8.66418	6.81526	9.10243	5.62743	6.65776	2.10829	6.96579	8.589	8.61866	10.9681	19.6272	18.3529	16.301	12.4009	14.4547	11.7448	14.3851	14.1211	15.3267	10.8358	10.6487		4.19803	4.02267	1.86776	1.90011	1.71316	1.59524
646	11.7897	13.1059	8.7829	9.13024	11.9245	12.2031	11.6884	14.4649	12.5332	13.0865	15.0283	13.0662	9.87058	9.21398	12.5752	14.0676	11.0434	11.3088	6.33907	6.06882	7.6098	8.69758	6.84155	9.13824	5.65669	6.68203	2.12015	6.98503	8.6067	8.64479	10.995	19.6498	18.3944	16.3399	12.4151	14.4938	11.7416	14.3868	14.1236	15.326	10.8327	10.6442		4.24385	4.06537	1.89526	1.92839	1.73329	1.6263
647	11.8036	13.1176	8.79787	9.14882	11.94	12.2223	11.7087	14.492	12.561	13.0999	15.0607	13.0969	9.88757	9.22589	12.6019	14.0935	11.0657	11.3304	6.35823	6.08729	7.64445	8.73048	6.8669	9.17249	5.68574	6.7057	2.13166	7.00356	8.6235	8.67069	11.0221	19.6683	18.433	16.376	12.4268	14.5307	11.7375	14.388	14.1252	15.3242	10.8295	10.639		4.29011	4.10838	1.92308	1.95726	1.75358	1.65741
648	11.8178	13.129	8.8128	9.16776	11.9555	12.242	11.7281	14.5177	12.5884	13.1124	15.092	13.1273	9.90323	9.23722	12.6288	14.1189	11.0878	11.351	6.37697	6.10557	7.67908	8.76309	6.89163	9.20567	5.71472	6.72901	2.14298	7.0217	8.63975	8.69645	11.0494	19.6842	18.4695	16.4102	12.4367	14.566	11.7327	14.3889	14.1264	15.3215	10.8265	10.6334		4.33687	4.15174	1.95125	1.98664	1.7741	1.6887
649	11.8323	13.1404	8.82784	9.18709	11.9711	12.262	11.7469	14.5428	12.6155	13.1244	15.1229	13.1577	9.9182	9.24835	12.6558	14.1442	11.1098	11.3712	6.39554	6.1238	7.71371	8.79562	6.91605	9.23827	5.74379	6.7522	2.15428	7.03976	8.6558	8.72219	11.0767	19.6986	18.5046	16.4432	12.4459	14.6004	11.7278	14.3897	14.1274	15.3185	10.8237	10.6278		4.38422	4.19547	1.97976	2.01646	1.79492	1.72029
650	11.8472	13.1522	8.84317	9.20679	11.9868	12.282	11.7658	14.568	12.6426	13.1364	15.1535	13.188	9.93316	9.25961	12.6829	14.1697	11.132	11.3914	6.41421	6.14213	7.74838	8.82828	6.94047	9.27081	5.77309	6.77551	2.16571	7.05809	8.67199	8.74804	11.1039	19.7128	18.5393	16.476	12.4552	14.6345	11.723	14.3906	14.1286	15.3155	10.8213	10.6224		4.43221	4.23962	2.00863	2.04665	1.81608	1.75234
651	11.8624	13.1646	8.85894	9.22688	12.0025	12.3017	11.7852	14.594	12.6699	13.149	15.1845	13.2184	9.94876	9.27137	12.7101	14.1956	11.1546	11.412	6.43325	6.16071	7.78312	8.86131	6.96521	9.30376	5.80277	6.79917	2.17743	7.07699	8.68867	8.7741	11.131	19.7279	18.5742	16.5092	12.4654	14.6691	11.7189	14.3919	14.1302	15.3129	10.8194	10.6175		4.4809	4.2842	2.03788	2.07714	1.83765	1.78497
652	11.8781	13.178	8.8753	9.24734	12.0185	12.3208	11.8056	14.6215	12.6977	13.1625	15.2161	13.2492	9.96566	9.28397	12.7375	14.2223	11.1779	11.4334	6.45292	6.17968	7.81795	8.89489	6.99058	9.33764	5.83298	6.82343	2.1896	7.09679	8.70618	8.80048	11.1579	19.7453	18.6103	16.5438	12.4774	14.7047	11.7157	14.3935	14.1325	15.3113	10.8181	10.6136		4.53038	4.32927	2.0675	2.10787	1.85969	1.81831
653	11.8941	13.1927	8.89243	9.2682	12.0346	12.3391	11.8276	14.6512	12.7261	13.1774	15.2489	13.2803	9.98453	9.29778	12.7651	14.25	11.2019	11.4561	6.47347	6.19918	7.8529	8.92926	7.01689	9.37294	5.86386	6.84852	2.20238	7.11782	8.72488	8.82732	11.1844	19.7661	18.6482	16.5806	12.4923	14.7422	11.7139	14.3959	14.1359	15.3109	10.8175	10.6109		4.5807	4.37484	2.09752	2.13875	1.88226	1.8525
654	11.9107	13.209	8.91047	9.28944	12.051	12.3564	11.8516	14.6839	12.7553	13.1943	15.2833	13.3121	10.006	9.31314	12.7928	14.2792	11.2269	11.4806	6.49518	6.21936	7.88802	8.96463	7.04446	9.41014	5.89556	6.87468	2.21593	7.14039	8.74511	8.85471	11.2105	19.7916	18.6889	16.6203	12.5107	14.782	11.714	14.3991	14.1408	15.3122	10.8177	10.6097		4.63192	4.42096	2.12793	2.16973	1.90542	1.88767
655	11.9301	13.2279	8.93078	9.31271	12.0693	12.3746	11.8785	14.72	12.7869	13.2139	15.3205	13.3457	10.0297	9.33062	12.8231	14.3113	11.2544	11.5069	6.51858	6.24098	7.92442	9.00213	7.07352	9.44957	5.92889	6.90242	2.23021	7.16499	8.76722	8.884	11.238	19.8217	18.7326	16.663	12.5326	14.8247	11.717	14.4047	14.1485	15.3164	10.8204	10.6109		4.68541	4.46849	2.15951	2.20183	1.9299	1.92431
656	11.9541	13.2498	8.954	9.33907	12.0908	12.3954	11.9079	14.7588	12.8215	13.2362	15.361	13.3818	10.0543	9.35015	12.8576	14.3471	11.285	11.5348	6.5437	6.26436	7.96281	9.04223	7.10385	9.4908	5.96417	6.93176	2.24501	7.19156	8.79101	8.91591	11.2681	19.8546	18.7784	16.7074	12.5569	14.8694	11.7232	14.4134	14.1596	15.3237	10.8263	10.6149		4.74192	4.51796	2.19271	2.23581	1.95608	1.96256
657	11.9812	13.2738	8.97929	9.36761	12.1144	12.418	11.9392	14.7995	12.8581	13.2605	15.4036	13.4197	10.0798	9.37113	12.8949	14.3854	11.3177	11.5637	6.57005	6.28895	8.00253	9.08416	7.13507	9.53328	6.00085	6.96226	2.26023	7.21956	8.81602	8.94962	11.3	19.8895	18.8257	16.7531	12.5829	14.9156	11.7318	14.4242	14.1732	15.3332	10.8346	10.6208		4.80068	4.56886	2.22711	2.27116	1.98353	2.00205
658	12.01	13.2992	9.00576	9.39742	12.1392	12.4414	11.9715	14.8415	12.8957	13.2858	15.4474	13.4586	10.1058	9.393	12.9337	14.4252	11.3517	11.5932	6.59712	6.31425	8.04297	9.12712	7.16681	9.57645	6.03839	6.99344	2.27575	7.24847	8.8418	8.98431	11.3327	19.9256	18.8736	16.7994	12.61	14.9625	11.7417	14.4363	14.188	15.3439	10.8443	10.6279		4.86091	4.62069	2.26231	2.30738	2.0118	2.0424
659	12.0391	13.325	9.03258	9.42762	12.164	12.4646	12.0041	14.8837	12.9335	13.3114	15.4912	13.4976	10.1321	9.41516	12.9727	14.4652	11.3859	11.623	6.62441	6.33973	8.08347	9.17032	7.19868	9.61976	6.07624	7.02484	2.29146	7.27779	8.86788	9.01917	11.3653	19.962	18.9214	16.8457	12.6376	15.0094	11.752	14.4486	14.2032	15.3549	10.8544	10.6353		4.92182	4.67295	2.29789	2.34396	2.04045	2.08326
660	12.0673	13.3504	9.05887	9.45729	12.1879	12.4868	12.0362	14.9256	12.9705	13.3364	15.5339	13.5358	10.1583	9.43703	13.0106	14.5045	11.4195	11.6524	6.65143	6.36485	8.12342	9.213	7.23032	9.66264	6.11385	7.056	2.30725	7.30699	8.89378	9.05338	11.397	19.9977	18.9681	16.8915	12.665	15.0557	11.7617	14.4601	14.2176	15.3652	10.8641	10.6424		4.98263	4.72514	2.33341	2.3804	2.06904	2.12425
661	12.0931	13.3746	9.08377	9.48553	12.2099	12.507	12.0669	14.9663	13.0058	13.36	15.5746	13.5726	10.1842	9.45802	13.046	14.5419	11.4516	11.6812	6.67768	6.3891	8.16216	9.25435	7.26135	9.70454	6.15066	7.08646	2.32302	7.33555	8.91906	9.08611	11.4269	20.032	19.0131	16.9362	12.6916	15.1007	11.77	14.47	14.2302	15.3737	10.8724	10.6484		5.04256	4.77675	2.36848	2.41619	2.09713	2.165
662	12.1151	13.3967	9.10643	9.51145	12.229	12.5243	12.0954	15.0051	13.0383	13.3814	15.6122	13.607	10.2095	9.47756	13.0777	14.5763	11.4811	11.7088	6.70265	6.41195	8.19908	9.29359	7.29139	9.74489	6.18612	7.11575	2.33866	7.36296	8.94325	9.11656	11.454	20.064	19.0555	16.9791	12.7169	15.1436	11.7757	14.4773	14.2399	15.3797	10.8783	10.6525		5.10082	4.82728	2.40268	2.45082	2.12429	2.20514
663	12.132	13.4159	9.12597	9.53415	12.2442	12.5378	12.121	15.041	13.0672	13.3997	15.6456	13.6382	10.234	9.49506	13.1042	14.6065	11.5073	11.7349	6.72585	6.43287	8.23352	9.32994	7.32006	9.78314	6.21969	7.1434	2.35405	7.38868	8.96588	9.1439	11.4775	20.0927	19.0946	17.0198	12.7401	15.1838	11.7781	14.4809	14.2457	15.3819	10.8809	10.654		5.15663	4.87624	2.43557	2.4838	2.15006	2.24431
664	12.1463	13.4339	9.14398	9.55533	12.2574	12.5492	12.1454	15.0759	13.0944	13.4167	15.677	13.668	10.2583	9.51169	13.1283	14.635	11.5318	11.7604	6.74831	6.45294	8.26678	9.365	7.34817	9.82049	6.25243	7.1703	2.36945	7.41386	8.98789	9.16972	11.4992	20.1202	19.1319	17.0595	12.7626	15.2227	11.7791	14.483	14.2498	15.3826	10.8822	10.6544		5.21151	4.92456	2.46797	2.51608	2.17532	2.28323
665	12.1614	13.4528	9.16247	9.57715	12.2709	12.5606	12.1704	15.1117	13.1223	13.4344	15.7091	13.6985	10.2832	9.52888	13.153	14.6643	11.5571	11.7866	6.77128	6.47347	8.30044	9.40072	7.37668	9.85835	6.28567	7.19753	2.38515	7.43982	9.01042	9.19599	11.5211	20.1487	19.1696	17.0997	12.7862	15.2621	11.7811	14.4859	14.2548	15.384	10.8844	10.6558		5.26736	4.97345	2.50088	2.5489	2.20116	2.32281
666	12.1769	13.4722	9.18127	9.59938	12.2845	12.5718	12.1959	15.1482	13.1504	13.4525	15.7415	13.7293	10.3085	9.54645	13.1781	14.6943	11.5827	11.8131	6.79458	6.49429	8.33429	9.43684	7.40545	9.89653	6.31925	7.22499	2.4011	7.46637	9.03334	9.2225	11.543	20.1779	19.2073	17.1402	12.8104	15.3018	11.7837	14.4894	14.2603	15.3859	10.8873	10.6578		5.32395	5.02278	2.5342	2.58212	2.22744	2.36294
667	12.1925	13.4919	9.20018	9.62179	12.2979	12.5827	12.2216	15.185	13.1786	13.4708	15.7738	13.7601	10.3341	9.56423	13.2032	14.7244	11.6086	11.8399	6.81806	6.51521	8.36812	9.47311	7.43434	9.9348	6.35304	7.25257	2.41723	7.49328	9.05649	9.24902	11.5648	20.2073	19.2447	17.1808	12.8352	15.3415	11.7868	14.4931	14.266	15.3879	10.8905	10.6601		5.38108	5.07243	2.5678	2.61561	2.25404	2.40352
668	12.2079	13.5117	9.21904	9.64416	12.311	12.593	12.2471	15.2218	13.2065	13.489	15.8057	13.7907	10.3598	9.58206	13.2279	14.7543	11.6342	11.8667	6.84155	6.53608	8.40173	9.50927	7.46319	9.97296	6.38689	7.28016	2.43351	7.52036	9.07973	9.27533	11.5861	20.2367	19.2817	17.2212	12.8602	15.3809	11.7897	14.4965	14.2715	15.3897	10.8938	10.6625		5.43854	5.12228	2.60159	2.64923	2.28083	2.44443
669	12.2226	13.5314	9.23766	9.66626	12.3235	12.6025	12.2723	15.2584	13.2338	13.5068	15.8367	13.8208	10.3855	9.59974	13.2517	14.7837	11.6595	11.8932	6.86487	6.55671	8.43491	9.54506	7.49188	10.0108	6.42064	7.30767	2.44988	7.54741	9.10291	9.30121	11.6067	20.2656	19.3178	17.2612	12.8851	15.4198	11.7923	14.4995	14.2765	15.3911	10.8968	10.6647		5.49611	5.1722	2.63545	2.68285	2.30767	2.48557
670	12.2363	13.5505	9.25585	9.68785	12.3352	12.611	12.2969	15.2944	13.2602	13.524	15.8666	13.8499	10.411	9.61712	13.2744	14.8121	11.6841	11.9194	6.88786	6.57693	8.46745	9.58024	7.52024	10.0481	6.45414	7.33497	2.46628	7.5742	9.12589	9.32643	11.6263	20.2936	19.3528	17.3004	12.9098	15.4579	11.7942	14.5015	14.2805	15.3916	10.8992	10.6663		5.55357	5.22207	2.66928	2.71634	2.33443	2.52683
671	12.2488	13.569	9.27344	9.70872	12.3458	12.6184	12.3206	15.3295	13.2855	13.5402	15.895	13.878	10.4362	9.63401	13.2955	14.8393	11.7078	11.9448	6.91036	6.59657	8.49915	9.61453	7.54815	10.0847	6.48726	7.36196	2.48267	7.60055	9.14853	9.35078	11.6448	20.3204	19.3865	17.3387	12.9339	15.495	11.795	14.5023	14.2833	15.391	10.9009	10.6672		5.61073	5.27177	2.70296	2.74957	2.36098	2.56809
672	12.2597	13.5865	9.29023	9.72863	12.3552	12.6243	12.3431	15.3635	13.3093	13.5552	15.9215	13.9045	10.461	9.65024	13.3147	14.8648	11.7302	11.9694	6.93218	6.61545	8.5298	9.64769	7.57546	10.1202	6.51985	7.38853	2.49898	7.62623	9.17068	9.37403	11.6618	20.3457	19.4185	17.3757	12.9572	15.5309	11.7943	14.5015	14.2845	15.3889	10.9013	10.6671		5.66735	5.32118	2.7364	2.7824	2.38719	2.60925
673	12.2686	13.6027	9.30606	9.74735	12.363	12.6287	12.3641	15.396	13.3314	13.5688	15.9457	13.9294	10.4851	9.66564	13.3316	14.8883	11.7512	11.9929	6.95318	6.63341	8.55919	9.67946	7.60202	10.1547	6.55175	7.41457	2.51517	7.65105	9.19219	9.39596	11.6772	20.3689	19.4485	17.4113	12.9795	15.5651	11.7919	14.4987	14.2837	15.3851	10.9003	10.6656		5.72324	5.37017	2.76947	2.8147	2.41294	2.65021
674	12.2763	13.6183	9.32135	9.76541	12.3699	12.632	12.3843	15.4276	13.3524	13.5815	15.9685	13.9531	10.5089	9.6806	13.3471	14.9106	11.7713	12.0158	6.97371	6.65083	8.58779	9.7104	7.62814	10.1884	6.5833	7.44035	2.53133	7.67545	9.21339	9.41707	11.6914	20.391	19.4772	17.4459	13.0013	15.5984	11.7884	14.4948	14.2817	15.3802	10.8985	10.6633		5.77889	5.41902	2.80244	2.8468	2.43852	2.69121
675	12.2837	13.6339	9.3366	9.78342	12.3764	12.6347	12.4044	15.4592	13.3731	13.5941	15.9907	13.9765	10.5328	9.69559	13.3622	14.9327	11.7912	12.0386	6.99424	6.66816	8.61613	9.74121	7.6542	10.2219	6.61493	7.46615	2.5476	7.69995	9.23466	9.43797	11.7053	20.4128	19.5053	17.4803	13.0234	15.6313	11.7848	14.4906	14.2795	15.375	10.8968	10.6611		5.83488	5.4681	2.83561	2.87906	2.46429	2.73254
676	12.2908	13.6494	9.35176	9.80131	12.3824	12.6368	12.4243	15.4906	13.3935	13.6065	16.0124	13.9996	10.5566	9.71057	13.3767	14.9545	11.8109	12.0613	7.0147	6.68537	8.64417	9.77181	7.68016	10.2552	6.64656	7.49194	2.56397	7.72451	9.25595	9.45859	11.7186	20.4344	19.5328	17.5143	13.0455	15.6639	11.7811	14.4861	14.2769	15.3696	10.8951	10.6588		5.89114	5.51733	2.86894	2.91144	2.49021	2.77416
677	12.2974	13.6647	9.36674	9.819	12.388	12.6381	12.4439	15.5218	13.4134	13.6186	16.0333	14.0221	10.5805	9.72546	13.3905	14.9758	11.8303	12.0838	7.03505	6.70239	8.67183	9.80211	7.70597	10.2883	6.67815	7.51769	2.58044	7.74907	9.27724	9.47885	11.7313	20.4556	19.5595	17.5479	13.0677	15.696	11.777	14.4812	14.2739	15.3638	10.8931	10.6563		5.94758	5.56669	2.90238	2.94386	2.51622	2.81605
678	12.3034	13.6799	9.38148	9.83641	12.3929	12.6387	12.4631	15.5528	13.4327	13.6303	16.0534	14.0441	10.6043	9.74021	13.4035	14.9966	11.8493	12.106	7.05523	6.71916	8.69906	9.83203	7.7316	10.321	6.70964	7.54333	2.59699	7.77358	9.29846	9.49867	11.7434	20.4762	19.5854	17.581	13.0899	15.7276	11.7726	14.4757	14.2704	15.3574	10.8909	10.6537		6.00413	5.61612	2.93589	2.97629	2.54228	2.85816
679	12.3087	13.6948	9.39592	9.85347	12.3972	12.6384	12.4818	15.5834	13.4513	13.6416	16.0726	14.0654	10.628	9.75476	13.4156	15.0167	11.8677	12.128	7.07519	6.73563	8.72577	9.86149	7.75702	10.3533	6.74098	7.56885	2.61361	7.79799	9.31959	9.51797	11.7546	20.4963	19.6103	17.6136	13.1119	15.7586	11.7677	14.4695	14.2661	15.3505	10.8884	10.6507		6.0607	5.66557	2.96943	3.00865	2.56834	2.90046
680	12.3131	13.7094	9.40998	9.8701	12.4007	12.6373	12.5	15.6135	13.4691	13.6522	16.0908	14.086	10.6518	9.76906	13.4266	15.0359	11.8856	12.1496	7.09487	6.75176	8.75192	9.89042	7.78219	10.3852	6.77212	7.59419	2.63031	7.82223	9.34056	9.53669	11.7649	20.5158	19.6344	17.6456	13.1337	15.7889	11.7621	14.4626	14.2611	15.3428	10.8853	10.6473		6.11721	5.715	3.00296	3.0409	2.59435	2.9429
681	12.3165	13.7235	9.4236	9.88622	12.4034	12.6351	12.5176	15.6432	13.486	13.6622	16.1078	14.1057	10.6754	9.78304	13.4364	15.0543	11.9028	12.1708	7.11422	6.76748	8.77743	9.91872	7.80706	10.4165	6.80301	7.61932	2.64707	7.84626	9.36135	9.55473	11.7742	20.5344	19.6574	17.677	13.1553	15.8185	11.7558	14.4547	14.2552	15.3343	10.8817	10.6434		6.1736	5.76436	3.03643	3.07297	2.62027	2.98546
682	12.3188	13.7372	9.4367	9.90176	12.4052	12.6319	12.5345	15.6723	13.5018	13.6715	16.1237	14.1245	10.6989	9.79665	13.4449	15.0716	11.9192	12.1916	7.13319	6.78273	8.80224	9.94633	7.83161	10.4474	6.83358	7.6442	2.66388	7.87003	9.3819	9.57203	11.7824	20.5522	19.6792	17.7076	13.1764	15.8473	11.7487	14.4458	14.2483	15.3249	10.8774	10.639		6.22976	5.8136	3.0698	3.10482	2.64605	3.02809
683	12.3201	13.7504	9.44934	9.91676	12.4061	12.6278	12.5507	15.7009	13.5167	13.6801	16.1383	14.1424	10.7223	9.80992	13.4521	15.088	11.9349	12.2119	7.1518	6.79756	8.82639	9.97329	7.85584	10.4777	6.86388	7.66884	2.68076	7.89356	9.40225	9.58864	11.7896	20.5692	19.7001	17.7376	13.1973	15.8753	11.7409	14.436	14.2405	15.3147	10.8725	10.6341		6.28577	5.86276	3.10309	3.13648	2.67171	3.07082
684	12.3204	13.7633	9.46158	9.93131	12.4063	12.6227	12.5664	15.729	13.5308	13.6881	16.152	14.1595	10.7456	9.82292	13.4582	15.1036	11.95	12.2319	7.17013	6.81204	8.84998	9.99971	7.87982	10.5075	6.89397	7.6933	2.69769	7.91692	9.42243	9.60466	11.7959	20.5855	19.7199	17.7669	13.218	15.9026	11.7324	14.4254	14.2319	15.3037	10.8671	10.6288		6.34171	5.91189	3.13638	3.16803	2.69733	3.11369
685	12.32	13.7758	9.47344	9.94544	12.4057	12.6167	12.5815	15.7566	13.5441	13.6956	16.1647	14.1759	10.7688	9.83566	13.4632	15.1184	11.9645	12.2516	7.18819	6.82616	8.87301	10.0256	7.90353	10.5369	6.92385	7.71757	2.71469	7.94013	9.44247	9.62008	11.8013	20.6011	19.7387	17.7957	13.2384	15.9292	11.7234	14.4141	14.2226	15.2921	10.8612	10.6231		6.39761	5.961	3.16965	3.19947	2.7229	3.15671
686	12.3186	13.788	9.48491	9.95913	12.4043	12.6098	12.596	15.7839	13.5567	13.7025	16.1763	14.1916	10.7919	9.84813	13.4672	15.1324	11.9784	12.2709	7.20597	6.83994	8.89547	10.0509	7.92699	10.5658	6.95353	7.74167	2.73175	7.96318	9.46235	9.63492	11.8057	20.616	19.7566	17.8238	13.2586	15.9552	11.7137	14.4019	14.2124	15.2797	10.8549	10.617		6.45346	6.01009	3.20292	3.2308	2.74843	3.19987
687	12.3164	13.7998	9.496	9.97239	12.4022	12.6019	12.6101	15.8107	13.5684	13.7089	16.187	14.2066	10.815	9.86035	13.4702	15.1456	11.9917	12.2899	7.22348	6.85338	8.91738	10.0758	7.95019	10.5943	6.98301	7.76559	2.74888	7.98608	9.48208	9.64918	11.8094	20.6302	19.7735	17.8513	13.2787	15.9804	11.7035	14.3891	14.2015	15.2667	10.8481	10.6105		6.50926	6.05916	3.23618	3.26204	2.77392	3.24318
688	12.3134	13.8113	9.50672	9.98522	12.3993	12.5932	12.6236	15.8371	13.5794	13.7147	16.1966	14.2208	10.838	9.87231	13.472	15.158	12.0044	12.3085	7.24073	6.86648	8.93874	10.1001	7.97314	10.6223	7.0123	7.78933	2.76607	8.00882	9.50167	9.66286	11.8121	20.6437	19.7895	17.8782	13.2985	16.0051	11.6927	14.3755	14.1899	15.2529	10.8409	10.6037		6.56502	6.10821	3.26943	3.29318	2.79937	3.28664
689	12.3095	13.8224	9.51706	9.99763	12.3957	12.5836	12.6366	15.8631	13.5896	13.7199	16.2053	14.2343	10.8609	9.88401	13.4729	15.1697	12.0166	12.3269	7.2577	6.87923	8.95954	10.1239	7.99584	10.6499	7.04138	7.81289	2.78333	8.03142	9.52111	9.67597	11.8139	20.6566	19.8045	17.9046	13.3181	16.029	11.6813	14.3611	14.1775	15.2385	10.8333	10.5965		6.62074	6.15725	3.30268	3.32421	2.82479	3.33026
690	12.3048	13.8332	9.52702	10.0096	12.3913	12.5731	12.649	15.8886	13.5991	13.7247	16.2129	14.2471	10.8837	9.89547	13.4727	15.1806	12.0282	12.3449	7.27441	6.89165	8.9798	10.1471	8.01829	10.677	7.07028	7.83629	2.80066	8.05387	9.5404	9.6885	11.8149	20.6688	19.8185	17.9303	13.3376	16.0523	11.6693	14.346	14.1644	15.2234	10.8252	10.5889		6.67643	6.20628	3.33593	3.35516	2.85017	3.37403
691	12.2992	13.8437	9.53662	10.0212	12.3863	12.5617	12.661	15.9138	13.6077	13.7289	16.2196	14.2592	10.9064	9.90667	13.4715	15.1908	12.0392	12.3625	7.29086	6.90374	8.99952	10.1699	8.04049	10.7038	7.09898	7.85951	2.81805	8.07618	9.55956	9.70047	11.815	20.6803	19.8315	17.9555	13.3568	16.0749	11.6567	14.3302	14.1505	15.2076	10.8167	10.581		6.73209	6.25529	3.36918	3.38601	2.87553	3.41796
692	12.2928	13.8538	9.54585	10.0324	12.3804	12.5493	12.6724	15.9385	13.6157	13.7325	16.2253	14.2705	10.9291	9.91763	13.4692	15.2002	12.0497	12.3799	7.30705	6.9155	9.01869	10.1921	8.06245	10.73	7.12749	7.88256	2.83551	8.09835	9.57858	9.71187	11.8143	20.6912	19.8436	17.9801	13.3759	16.0969	11.6436	14.3136	14.1359	15.1912	10.8078	10.5727		6.78772	6.3043	3.40243	3.41677	2.90085	3.46204
693	12.2856	13.8636	9.55472	10.0431	12.3739	12.5361	12.6833	15.9628	13.6229	13.7357	16.2301	14.2812	10.9516	9.92835	13.466	15.2088	12.0596	12.3969	7.32299	6.92693	9.03733	10.2139	8.08417	10.7559	7.15582	7.90544	2.85304	8.12039	9.59747	9.72271	11.8127	20.7014	19.8548	18.0041	13.3948	16.1182	11.6299	14.2963	14.1205	15.174	10.7984	10.5641		6.84333	6.3533	3.43569	3.44745	2.92615	3.50629
694	12.2776	13.8731	9.56322	10.0535	12.3666	12.5221	12.6937	15.9868	13.6293	13.7383	16.2338	14.2912	10.9742	9.93883	13.4617	15.2167	12.0689	12.4136	7.33867	6.93803	9.05543	10.2351	8.10564	10.7813	7.18397	7.92816	2.87064	8.14229	9.61622	9.73299	11.8102	20.711	19.865	18.0275	13.4135	16.1389	11.6157	14.2783	14.1045	15.1562	10.7887	10.5551		6.89892	6.4023	3.46895	3.47804	2.95142	3.5507
695	12.2687	13.8823	9.57136	10.0634	12.3586	12.5071	12.7036	16.0103	13.635	13.7404	16.2366	14.3005	10.9966	9.94907	13.4565	15.2239	12.0777	12.43	7.3541	6.94882	9.073	10.2559	8.12688	10.8063	7.21193	7.95071	2.8883	8.16407	9.63484	9.74272	11.8069	20.7199	19.8743	18.0504	13.4321	16.1589	11.6009	14.2597	14.0877	15.1378	10.7785	10.5457		6.9545	6.4513	3.50222	3.50855	2.97668	3.59527
696	12.2591	13.8912	9.57915	10.073	12.3498	12.4912	12.713	16.0334	13.64	13.7419	16.2385	14.3091	11.019	9.95908	13.4502	15.2304	12.086	12.4461	7.36929	6.95928	9.09005	10.2762	8.14788	10.8309	7.23972	7.9731	2.90604	8.18571	9.65332	9.7519	11.8028	20.7282	19.8826	18.0727	13.4505	16.1783	11.5856	14.2403	14.0702	15.1187	10.768	10.5361		7.01006	6.5003	3.5355	3.53898	3.00191	3.64
697	12.2486	13.8997	9.58659	10.0822	12.3404	12.4745	12.7219	16.0562	13.6442	13.743	16.2394	14.317	11.0413	9.96885	13.4429	15.2361	12.0937	12.4619	7.38422	6.96942	9.10657	10.2959	8.16864	10.855	7.26733	7.99533	2.92385	8.20723	9.67169	9.76053	11.7978	20.7358	19.89	18.0944	13.4687	16.1971	11.5697	14.2202	14.052	15.099	10.757	10.526		7.06561	6.5493	3.56879	3.56933	3.02712	3.6849
698	12.2374	13.9079	9.59367	10.0909	12.3302	12.4569	12.7303	16.0786	13.6477	13.7436	16.2394	14.3242	11.0635	9.9784	13.4347	15.2412	12.1009	12.4774	7.39892	6.97926	9.12257	10.3152	8.18918	10.8788	7.29476	8.0174	2.94172	8.22864	9.68992	9.76862	11.792	20.7429	19.8965	18.1156	13.4868	16.2152	11.5534	14.1994	14.0331	15.0786	10.7456	10.5157		7.12117	6.5983	3.6021	3.59961	3.05232	3.72997
699	12.2253	13.9159	9.60041	10.0993	12.3194	12.4384	12.7382	16.1005	13.6505	13.7436	16.2384	14.3308	11.0857	9.98772	13.4255	15.2455	12.1075	12.4926	7.41338	6.98878	9.13806	10.334	8.20948	10.9021	7.32203	8.03932	2.95967	8.24992	9.70804	9.77617	11.7853	20.7493	19.9021	18.1362	13.5047	16.2327	11.5364	14.1779	14.0136	15.0576	10.7339	10.505		7.17672	6.64732	3.63542	3.62982	3.07751	3.77521
700	12.2125	13.9235	9.6068	10.1073	12.3078	12.4191	12.7456	16.1221	13.6526	13.7432	16.2364	14.3367	11.1078	9.99682	13.4153	15.2491	12.1136	12.5075	7.4276	6.99799	9.15303	10.3524	8.22955	10.925	7.34913	8.06107	2.97769	8.27109	9.72603	9.78318	11.7779	20.7551	19.9067	18.1562	13.5225	16.2496	11.519	14.1557	13.9933	15.0359	10.7218	10.494		7.23227	6.69634	3.66876	3.65995	3.10268	3.82063
[truncated: 78 more columns]
