# Supplementary material for: Structural color in Junonia butterflies evolves by tuning scale lamina thickness
Source: eLife. 2020 Apr 7;9:e52187. doi: 10.7554/eLife.52187 (PMC7138606; doi:10.7554/eLife.52187)
Supplement: Figure 9—source data 1. [file elife-52187-fig9-data1.xlsx]

## Sheet: hiertBlue
wl	hierta_blue_s3_1	hierta_blue_s3_2	hierta_blue_s1_1	hierta_blue_s1_2	hierta_blue_s2_1	hierta_blue_s2_2	hierta_yellow_s1_1	hierta_yellow_s1_2	hierta_yellow_s4_1	hierta_yellow_s4_2	hierta_yellow_s2_1	hierta_yellow_s2_2	hierta_yellow_s3_1	hierta_yellow_s3_2		octavia_blue_s1_1	octavia_blue_s1_2	octavia_blue_s4_1	octavia_blue_s4_2	octavia_blue_s2_1	octavia_blue_s2_2	octavia_blue_s3_1	octavia_blue_s3_2	octavia_red_s1_1	octavia_red_s1_2	octavia_red_s4_1	octavia_red_s4_2	octavia_red_s2_1	octavia_red_s2_2	octavia_red_s3_1	octavia_red_s3_2	octavia_redband_s1_1	octavia_redband_s1_2	octavia_redband_s2_1	octavia_redband_s2_2	octavia_redband_s3_1	octavia_redband_s3_2	octavia_redband_s4_1	octavia_redband_s4_2		orithya_male_s1_1	orithya_male_s1_2	orithya_male_s2_1	orithya_male_s2_2	orithya_male_s3_1	orithya_male_s3_2	orithya_female_green_s1_1	orithya_female_green_s1_2	orithya_female_green_s2_1
400	0.00420337	0.00166247	0.0085123	0.02256	0.000300444	0.00190975	0.20129	0.199284	0.238078	0.235983	0.196336	0.184252	0.230075	0.228717		0.0428263	0.038129	0.0254089	0.0228666	0.0232691	0.0302476	0.0363459	0.0339808	0.129879	0.128744	0.0974957	0.103105	0.128113	0.126838	0.109645	0.100412	0.281631	0.282955	0.322486	0.327477	0.292898	0.283446	0.320408	0.304618		0.111176	0.104096	0.107479	0.100794	0.122619	0.133469	0.175324	0.179405	0.149083
401	0.00400228	0.00164852	0.00855631	0.0224429	0.000290008	0.0020797	0.198997	0.196979	0.236392	0.233933	0.194274	0.182258	0.227876	0.226386		0.0425511	0.0381238	0.0251196	0.0225139	0.0230456	0.0296501	0.0358583	0.0335432	0.129948	0.128718	0.097513	0.10287	0.128096	0.126986	0.109278	0.100411	0.281497	0.2835	0.323065	0.327884	0.294425	0.284955	0.322149	0.305674		0.110701	0.103745	0.106771	0.100255	0.122081	0.132521	0.174482	0.178397	0.148061
402	0.00380509	0.00163506	0.00859905	0.0223273	0.000279737	0.00224576	0.196734	0.1947	0.234707	0.231892	0.192227	0.180281	0.225688	0.224072		0.0422784	0.0381156	0.0248332	0.0221662	0.0228238	0.0290616	0.0353767	0.033111	0.13002	0.128697	0.0975316	0.102641	0.128086	0.127139	0.108921	0.100412	0.281377	0.284048	0.323651	0.328302	0.295943	0.286457	0.323883	0.306734		0.110228	0.103392	0.10607	0.0997211	0.121546	0.131584	0.173646	0.177397	0.147044
403	0.00361214	0.001622	0.00863978	0.0222123	0.000269674	0.00240732	0.1945	0.192448	0.233022	0.229861	0.190198	0.17832	0.223515	0.221776		0.0420086	0.0381041	0.0245499	0.0218238	0.0226032	0.0284829	0.0349016	0.0326847	0.130096	0.128682	0.0975507	0.102418	0.128081	0.127296	0.108574	0.100416	0.281272	0.284599	0.324244	0.328733	0.297451	0.28795	0.325608	0.307798		0.109753	0.103036	0.105377	0.099191	0.121013	0.130659	0.172811	0.176405	0.146029
404	0.0034238	0.00160921	0.00867777	0.0220975	0.000259867	0.00256377	0.192299	0.190225	0.231338	0.227842	0.188187	0.176378	0.221356	0.219498		0.041742	0.0380892	0.0242701	0.0214872	0.0223838	0.0279146	0.0344336	0.0322649	0.130174	0.128671	0.0975693	0.102201	0.128082	0.127457	0.108236	0.100422	0.281182	0.285152	0.324845	0.329177	0.298948	0.289434	0.327324	0.308864		0.109278	0.102676	0.104692	0.0986645	0.120482	0.129744	0.171978	0.17542	0.145016
405	0.00324042	0.00159657	0.00871229	0.0219821	0.000250359	0.00271448	0.19013	0.18803	0.229657	0.225835	0.186195	0.174457	0.219213	0.217241		0.0414792	0.0380709	0.023994	0.0211568	0.0221653	0.0273572	0.033973	0.0318524	0.130255	0.128665	0.0975868	0.10199	0.128088	0.127623	0.107907	0.100429	0.281109	0.285706	0.325455	0.329633	0.300434	0.290905	0.329027	0.309933		0.1088	0.102311	0.104015	0.0981416	0.119951	0.128842	0.171145	0.174441	0.144005
406	0.00306235	0.00158397	0.00874259	0.0218656	0.000241198	0.00285886	0.187997	0.185864	0.227979	0.223841	0.184225	0.172557	0.217087	0.215004		0.0412204	0.038049	0.023722	0.0208329	0.0219475	0.0268114	0.0335203	0.0314476	0.130339	0.128664	0.0976021	0.101786	0.128099	0.127792	0.107588	0.100437	0.281052	0.286262	0.326073	0.330104	0.301907	0.292364	0.330718	0.311003		0.108318	0.101941	0.103347	0.0976219	0.119421	0.127952	0.17031	0.173467	0.142993
407	0.00288995	0.0015713	0.00876795	0.0217474	0.000232429	0.00299627	0.185899	0.183727	0.226305	0.221863	0.182277	0.17068	0.214979	0.21279		0.0409661	0.0380234	0.0234544	0.020516	0.0217301	0.0262779	0.033076	0.0310512	0.130424	0.128667	0.0976145	0.101589	0.128113	0.127965	0.107277	0.100445	0.281015	0.286818	0.326701	0.330589	0.303367	0.293809	0.332393	0.312074		0.107832	0.101563	0.102686	0.0971052	0.11889	0.127075	0.169472	0.172498	0.141979
408	0.00272357	0.00155843	0.00878762	0.0216267	0.000224096	0.00312611	0.183839	0.181621	0.224637	0.219901	0.180352	0.168827	0.212891	0.210599		0.0407167	0.037994	0.0231915	0.0202064	0.0215129	0.0257572	0.0326406	0.0306638	0.130512	0.128674	0.0976232	0.101398	0.12813	0.128141	0.106974	0.100453	0.280996	0.287375	0.327338	0.331089	0.304813	0.295238	0.334052	0.313145		0.107341	0.101178	0.102034	0.0965911	0.118358	0.126211	0.168629	0.171532	0.140964
409	0.00256358	0.00154524	0.00880087	0.021503	0.000216247	0.00324777	0.181818	0.179546	0.222973	0.217957	0.178453	0.167001	0.210823	0.208433		0.0404725	0.0379607	0.0229337	0.0199046	0.0212958	0.0252499	0.0322144	0.030286	0.1306	0.128686	0.0976273	0.101215	0.128149	0.12832	0.10668	0.100459	0.280997	0.287931	0.327986	0.331604	0.306243	0.29665	0.335692	0.314216		0.106844	0.100784	0.101391	0.0960795	0.117823	0.125361	0.16778	0.170571	0.139945
410	0.00240918	0.00153201	0.00880899	0.0213774	0.000208764	0.00336202	0.179832	0.1775	0.221315	0.216027	0.176577	0.165197	0.208774	0.206289		0.0402331	0.037924	0.0226803	0.0196097	0.0210789	0.024755	0.0317965	0.029917	0.130691	0.128701	0.0976279	0.101038	0.128172	0.128503	0.106395	0.100466	0.281017	0.288487	0.328643	0.332134	0.307658	0.298048	0.337317	0.315288		0.106342	0.100384	0.100755	0.0955709	0.117288	0.124525	0.166927	0.169613	0.138925
411	0.00225934	0.00151909	0.0088139	0.0212517	0.000201507	0.00347025	0.177877	0.175481	0.219658	0.214109	0.17472	0.163413	0.20674	0.204164		0.0399973	0.0378844	0.0224306	0.0193208	0.0208629	0.024271	0.0313857	0.0295555	0.130784	0.128722	0.0976271	0.100867	0.1282	0.128689	0.106118	0.100473	0.281053	0.289044	0.329308	0.332678	0.30906	0.299434	0.33893	0.316362		0.105837	0.099979	0.100128	0.0950663	0.116755	0.123701	0.166074	0.168662	0.137906
412	0.00211409	0.00150652	0.0088158	0.0211259	0.000194488	0.00357277	0.175952	0.173488	0.218002	0.212204	0.172882	0.161648	0.20472	0.202057		0.0397649	0.0378418	0.0221845	0.0190376	0.0206479	0.0237977	0.0309818	0.0292012	0.130881	0.128747	0.0976251	0.100701	0.128233	0.128878	0.105851	0.100481	0.281106	0.289604	0.329983	0.333235	0.310451	0.300809	0.340533	0.317439		0.105331	0.0995701	0.0995087	0.0945656	0.116222	0.122889	0.165223	0.167718	0.136888
413	0.00197341	0.00149431	0.00881491	0.0210002	0.000187714	0.00366989	0.174055	0.17152	0.216349	0.210309	0.171062	0.159902	0.202715	0.199969		0.0395359	0.037796	0.0219418	0.0187604	0.0204339	0.0233348	0.0305849	0.0288537	0.13098	0.128778	0.0976224	0.100541	0.128272	0.129071	0.105592	0.100491	0.281174	0.290165	0.330666	0.333805	0.311829	0.302174	0.342125	0.318519		0.104823	0.0991573	0.0988973	0.0940687	0.115692	0.122089	0.164373	0.16678	0.135871
414	0.00183733	0.0014825	0.00881143	0.0208747	0.000181197	0.0037619	0.172186	0.169577	0.214696	0.208426	0.169261	0.158174	0.200725	0.197899		0.03931	0.0377469	0.0217027	0.018489	0.0202211	0.0228823	0.0301949	0.0285129	0.131082	0.128815	0.0976192	0.100387	0.128316	0.129268	0.105343	0.100503	0.281259	0.290728	0.331357	0.334389	0.313197	0.303529	0.343707	0.319602		0.104314	0.0987406	0.0982938	0.0935756	0.115163	0.121301	0.163525	0.16585	0.134857
415	0.00170584	0.00147112	0.00880557	0.0207496	0.000174947	0.00384913	0.170344	0.167657	0.213045	0.206553	0.167478	0.156465	0.198748	0.195848		0.0390871	0.0376945	0.021467	0.0182233	0.0200095	0.0224399	0.0298119	0.0281784	0.131188	0.128856	0.0976159	0.10024	0.128366	0.129469	0.105104	0.100517	0.281358	0.291294	0.332057	0.334985	0.314555	0.304875	0.345279	0.320688		0.103803	0.0983203	0.0976983	0.0930864	0.114636	0.120524	0.162678	0.164926	0.133844
416	0.00157895	0.00146019	0.00879755	0.020625	0.000168973	0.00393187	0.168528	0.16576	0.211396	0.204692	0.165713	0.154774	0.196786	0.193815		0.0388669	0.0376385	0.0212347	0.0179635	0.0197992	0.0220074	0.0294358	0.0278499	0.131297	0.128903	0.0976128	0.100098	0.128421	0.129675	0.104873	0.100533	0.281473	0.291863	0.332765	0.335595	0.315904	0.306211	0.346843	0.321777		0.103292	0.0978966	0.0971107	0.0926008	0.114111	0.119757	0.161834	0.164011	0.132834
417	0.00145668	0.00144975	0.00878757	0.0205011	0.000163285	0.00401043	0.166737	0.163885	0.209747	0.202841	0.163965	0.1531	0.194838	0.191801		0.0386495	0.0375789	0.0210057	0.0177095	0.0195903	0.0215847	0.0290665	0.0275272	0.13141	0.128955	0.0976103	0.0999632	0.128483	0.129886	0.104653	0.100552	0.281603	0.292435	0.33348	0.336217	0.317244	0.307538	0.348398	0.322869		0.10278	0.0974695	0.0965311	0.092119	0.113587	0.119001	0.160992	0.163103	0.131827
418	0.00133902	0.00143982	0.00877584	0.020378	0.000157893	0.00408511	0.16497	0.162031	0.208099	0.201	0.162234	0.151445	0.192904	0.189806		0.0384345	0.0375156	0.0207799	0.0174612	0.0193829	0.0211716	0.0287041	0.0272099	0.131525	0.129012	0.0976088	0.0998348	0.12855	0.130102	0.104442	0.100574	0.281747	0.29301	0.334204	0.336852	0.318577	0.308857	0.349946	0.323964		0.102268	0.0970393	0.0959594	0.0916408	0.113066	0.118256	0.160154	0.162203	0.130823
419	0.00122702	0.00143053	0.00876079	0.0202545	0.000152954	0.00415449	0.163232	0.160201	0.206455	0.199172	0.160524	0.14981	0.190986	0.187831		0.0382229	0.0374483	0.0205583	0.01722	0.0191764	0.0207695	0.0283497	0.0268998	0.131645	0.129075	0.0976059	0.0997132	0.128622	0.130322	0.104241	0.100597	0.281909	0.293588	0.334937	0.337502	0.319901	0.310164	0.351482	0.325062		0.101753	0.0966036	0.0953961	0.0911658	0.112544	0.117521	0.159315	0.161309	0.12982
420	0.00112138	0.00142192	0.00874116	0.0201295	0.000148563	0.00421728	0.161525	0.158395	0.204815	0.19736	0.158837	0.1482	0.189087	0.185881		0.0380155	0.0373769	0.0203413	0.0169871	0.0189705	0.0203797	0.028004	0.0265982	0.131767	0.129143	0.0975998	0.0995982	0.128698	0.130546	0.104048	0.100621	0.282091	0.294168	0.33568	0.338167	0.321212	0.311457	0.353004	0.326161		0.101234	0.0961609	0.0948416	0.0906934	0.112021	0.116799	0.158473	0.160422	0.128814
421	0.00102158	0.00141394	0.00871758	0.0200037	0.000144641	0.00427402	0.159848	0.156613	0.203179	0.195562	0.157173	0.146613	0.187204	0.183953		0.0378118	0.0373017	0.0201285	0.0167615	0.0187653	0.0200014	0.0276666	0.0263045	0.131892	0.129217	0.0975915	0.0994898	0.128777	0.130774	0.103865	0.100645	0.282292	0.294749	0.336433	0.338848	0.322513	0.312737	0.354512	0.327262		0.100711	0.0957121	0.0942957	0.0902241	0.111498	0.116089	0.15763	0.159542	0.127808
422	0.000927143	0.00140651	0.0086907	0.0198775	0.000141107	0.00432525	0.158198	0.154855	0.201545	0.193777	0.155529	0.145047	0.185338	0.182045		0.0376116	0.0372227	0.0199197	0.0165428	0.0185611	0.0196342	0.0273368	0.026018	0.132021	0.129297	0.0975817	0.0993877	0.12886	0.131006	0.10369	0.100671	0.28251	0.295333	0.337196	0.339544	0.323803	0.314005	0.356009	0.328366		0.100186	0.0952582	0.093758	0.0897581	0.110975	0.11539	0.156787	0.158668	0.126803
423	0.000837549	0.00139956	0.00866116	0.0197515	0.000137881	0.00437151	0.156573	0.153117	0.199913	0.192004	0.153903	0.1435	0.183487	0.180157		0.0374144	0.0371402	0.0197144	0.0163302	0.0183579	0.0192773	0.0270142	0.025738	0.132152	0.129382	0.0975715	0.0992919	0.128949	0.131242	0.103525	0.100698	0.282744	0.295919	0.337967	0.340253	0.325082	0.315263	0.357496	0.329472		0.0996588	0.0948002	0.0932284	0.0892957	0.110453	0.114703	0.155945	0.157801	0.125799
424	0.000752299	0.00139302	0.00862961	0.0196262	0.000134884	0.00441333	0.154971	0.151401	0.198283	0.190241	0.152295	0.141971	0.181649	0.178287		0.03722	0.0370544	0.0195122	0.016123	0.0181562	0.0189301	0.0266982	0.0254639	0.132287	0.129472	0.0975618	0.0992021	0.129045	0.131483	0.10337	0.100729	0.282994	0.296508	0.338747	0.340976	0.326353	0.316512	0.358975	0.330581		0.0991313	0.0943391	0.0927067	0.0888372	0.109934	0.114026	0.155105	0.156941	0.124799
425	0.00067089	0.00138682	0.00859669	0.0195022	0.000132036	0.00445125	0.153391	0.149705	0.196652	0.188487	0.150703	0.140457	0.179824	0.176433		0.0370279	0.0369654	0.0193128	0.0159206	0.0179559	0.0185921	0.0263883	0.0251951	0.132426	0.129567	0.0975535	0.0991183	0.129147	0.131728	0.103224	0.100762	0.283257	0.2971	0.339535	0.341712	0.327614	0.317754	0.360446	0.331695		0.0986043	0.0938759	0.0921927	0.088383	0.109417	0.11336	0.15427	0.15609	0.123802
426	0.00059282	0.00138089	0.00856306	0.01938	0.000129256	0.00448581	0.15183	0.148027	0.19502	0.18674	0.149124	0.138957	0.17801	0.174594		0.0368379	0.0368734	0.0191158	0.0157223	0.0177575	0.0182626	0.0260838	0.0249308	0.132568	0.129667	0.0975476	0.0990403	0.129257	0.131979	0.103089	0.100799	0.283532	0.297697	0.34033	0.342459	0.328867	0.31899	0.361912	0.332812		0.0980789	0.0934116	0.0916861	0.0879333	0.108905	0.112704	0.15344	0.155246	0.122811
427	0.000517585	0.00137515	0.00852934	0.0192601	0.000126465	0.00451755	0.150286	0.146368	0.193385	0.185	0.147558	0.137469	0.176206	0.172769		0.0366495	0.0367786	0.0189208	0.0155273	0.017561	0.0179409	0.0257844	0.0246704	0.132713	0.129773	0.0975449	0.0989679	0.129375	0.132234	0.102963	0.10084	0.283819	0.298297	0.341132	0.343217	0.330113	0.320221	0.363375	0.333935		0.0975559	0.0929472	0.0911867	0.0874885	0.108398	0.112058	0.152617	0.154412	0.121826
428	0.000444682	0.00136955	0.0084962	0.0191431	0.000123583	0.00454699	0.148757	0.144725	0.191748	0.183264	0.146002	0.135991	0.174411	0.170955		0.0364624	0.0366812	0.0187274	0.0153351	0.0173667	0.0176265	0.0254894	0.0244133	0.132862	0.129883	0.0975464	0.098901	0.129502	0.132496	0.102848	0.100885	0.284116	0.298902	0.34194	0.343986	0.331351	0.321449	0.364834	0.335062		0.0970364	0.0924837	0.0906943	0.0870489	0.107896	0.111421	0.151801	0.153587	0.120849
429	0.000379029	0.00136265	0.00845614	0.0190232	0.000121302	0.00457	0.147258	0.143106	0.190118	0.181548	0.144471	0.134541	0.17264	0.169172		0.0362799	0.0365768	0.0185376	0.0151499	0.0171724	0.0173253	0.0252042	0.0241631	0.133012	0.129995	0.0975469	0.0988454	0.129634	0.132764	0.102744	0.100934	0.284433	0.29951	0.342759	0.344772	0.33258	0.32266	0.366276	0.336188		0.0965112	0.0920096	0.0902112	0.0866103	0.107391	0.110796	0.150975	0.152762	0.119872
430	0.000324496	0.00135353	0.00840337	0.0188956	0.000120175	0.00458316	0.145799	0.141513	0.188502	0.179862	0.142977	0.133134	0.170905	0.167433		0.0361045	0.0364622	0.0183532	0.014975	0.0169765	0.0170419	0.024933	0.023923	0.133161	0.130108	0.0975417	0.0988052	0.129766	0.133042	0.102651	0.100982	0.284778	0.300119	0.343593	0.34558	0.333797	0.323845	0.367687	0.337306		0.0959729	0.0915161	0.0897393	0.0861698	0.106875	0.110183	0.150123	0.151934	0.118888
431	0.000279004	0.00134295	0.00834107	0.018763	0.000119913	0.00458808	0.144375	0.139946	0.186896	0.178199	0.141513	0.13176	0.169198	0.165728		0.0359349	0.0363395	0.0181733	0.014809	0.0167797	0.0167739	0.0246735	0.0236916	0.133309	0.130222	0.0975328	0.0987777	0.1299	0.133326	0.102567	0.10103	0.285147	0.30073	0.344441	0.346408	0.335002	0.325007	0.369074	0.338419		0.0954253	0.0910081	0.0892775	0.0857292	0.106352	0.109582	0.149254	0.151104	0.1179
432	0.000240476	0.00133163	0.00827246	0.0186278	0.000120226	0.00458636	0.14298	0.1384	0.185297	0.176555	0.140075	0.130414	0.167513	0.164052		0.0357698	0.0362107	0.0179974	0.0146503	0.0165831	0.0165188	0.0244235	0.0234678	0.133458	0.130339	0.0975221	0.09876	0.130038	0.133616	0.102494	0.101081	0.285537	0.301344	0.3453	0.347253	0.336198	0.326154	0.370444	0.339532		0.0948722	0.0904905	0.0888249	0.0852901	0.105827	0.108994	0.148376	0.150277	0.116912
433	0.000206834	0.0013203	0.00820071	0.0184926	0.000120826	0.00457961	0.141608	0.136875	0.1837	0.174923	0.138655	0.129088	0.165845	0.162397		0.0356078	0.036078	0.0178247	0.0144972	0.0163875	0.0162743	0.0241807	0.0232502	0.133611	0.130461	0.0975114	0.0987494	0.130182	0.133912	0.102431	0.101133	0.285942	0.30196	0.346169	0.348112	0.337383	0.32729	0.371803	0.340646		0.0943174	0.0899682	0.0883804	0.0848545	0.105302	0.108416	0.147498	0.149456	0.115926
434	0.000176	0.00130971	0.00812901	0.0183597	0.000121423	0.00456945	0.140252	0.135366	0.1821	0.173298	0.137248	0.127773	0.164186	0.160754		0.0354477	0.0359433	0.0176545	0.0143482	0.0161938	0.0160379	0.0239429	0.0230375	0.133767	0.130589	0.0975027	0.0987431	0.130333	0.134211	0.102378	0.101189	0.28636	0.30258	0.347045	0.348984	0.338559	0.328421	0.373158	0.341766		0.0937646	0.0894461	0.0879432	0.0844241	0.104782	0.107849	0.146628	0.148644	0.114945
435	0.000145898	0.00130059	0.00806057	0.0182317	0.000121729	0.00455749	0.138908	0.133873	0.180495	0.171672	0.135848	0.126464	0.162529	0.159115		0.0352881	0.0358088	0.017486	0.0142017	0.016003	0.0158072	0.0237078	0.0228285	0.133929	0.130724	0.0974979	0.0987384	0.130494	0.134513	0.102333	0.101249	0.286787	0.303203	0.347926	0.349866	0.339726	0.329552	0.374515	0.342895		0.0932178	0.088929	0.0875121	0.0840007	0.104271	0.107292	0.145774	0.147845	0.113972
436	0.000114448	0.00129366	0.00799858	0.0181111	0.000121453	0.00454534	0.137569	0.132393	0.178879	0.170041	0.13445	0.125152	0.160869	0.157474		0.0351278	0.0356763	0.0173185	0.014056	0.0158159	0.0155797	0.0234731	0.0226218	0.134098	0.130869	0.0974988	0.0987325	0.130666	0.134817	0.102298	0.101314	0.287219	0.303832	0.348811	0.350754	0.340885	0.33069	0.375882	0.344035		0.0926806	0.088422	0.0870863	0.0835861	0.103774	0.106744	0.144945	0.147063	0.113011
437	7.95747e-05	0.00128967	0.00794622	0.0180004	0.000120308	0.0045346	0.13623	0.130923	0.177248	0.168397	0.133047	0.123829	0.159198	0.155823		0.0349653	0.0355481	0.0171514	0.0139097	0.0156334	0.015353	0.0232366	0.0224161	0.134275	0.131023	0.0975074	0.0987226	0.130852	0.135121	0.102271	0.101384	0.287651	0.304465	0.349698	0.351647	0.342036	0.331839	0.377264	0.345191		0.0921569	0.0879299	0.0866647	0.0831821	0.103293	0.106206	0.144148	0.146301	0.112064
438	4.80138e-05	0.00128796	0.00788945	0.0178917	0.000118692	0.0045079	0.134933	0.129489	0.175618	0.16677	0.131674	0.12253	0.157543	0.154187		0.0348104	0.035422	0.0169868	0.013769	0.0154482	0.0151425	0.0230046	0.0222257	0.134458	0.131189	0.0975072	0.098711	0.131044	0.13542	0.102254	0.101451	0.288117	0.305099	0.35061	0.352569	0.343151	0.332972	0.378625	0.346352		0.0916247	0.0874297	0.0862541	0.082787	0.102817	0.105695	0.14335	0.145543	0.111112
439	2.65809e-05	0.00128735	0.00781515	0.0177768	0.000117176	0.00445127	0.133711	0.128113	0.174003	0.165183	0.130362	0.121284	0.155928	0.152593		0.0346713	0.0352945	0.016827	0.0136403	0.0152541	0.0149613	0.0227837	0.0220621	0.134643	0.131364	0.0974845	0.0987018	0.131235	0.135711	0.10225	0.101506	0.288646	0.30573	0.351566	0.35354	0.344208	0.334063	0.379932	0.347505		0.0910646	0.0869006	0.0858602	0.082398	0.102334	0.105225	0.142517	0.144775	0.11014
440	1.33152e-05	0.00128778	0.00772786	0.017658	0.000115725	0.00437143	0.132548	0.126783	0.172398	0.163627	0.1291	0.12008	0.154344	0.151032		0.0345445	0.0351657	0.0166715	0.0135213	0.015054	0.0148041	0.0225722	0.0219197	0.13483	0.131547	0.0974454	0.0986952	0.131429	0.135997	0.102258	0.101554	0.289224	0.306359	0.352557	0.354551	0.345219	0.335121	0.381196	0.348656		0.0904842	0.0863502	0.0854805	0.0820149	0.101848	0.104788	0.141661	0.144001	0.109153
441	6.25605e-06	0.00128921	0.00763214	0.0175374	0.000114305	0.00427511	0.13143	0.125489	0.170799	0.162095	0.127873	0.118909	0.152784	0.149498		0.0344262	0.0350355	0.0165197	0.0134102	0.0148506	0.0146652	0.0223686	0.0217931	0.135021	0.131739	0.0973959	0.0986915	0.131626	0.13628	0.102276	0.101598	0.289838	0.306987	0.353574	0.355592	0.346196	0.336156	0.382432	0.349806		0.0898914	0.0857861	0.0851124	0.0816375	0.101361	0.104376	0.140792	0.143227	0.108159
442	3.44285e-06	0.00129157	0.00753253	0.0174173	0.000112881	0.00416903	0.130341	0.12422	0.169202	0.160576	0.126671	0.117759	0.15124	0.147982		0.0343129	0.0349041	0.0163712	0.0133049	0.0146466	0.0145392	0.0221712	0.0216769	0.135216	0.131937	0.0973422	0.0986908	0.131829	0.136564	0.102304	0.101641	0.290477	0.307617	0.354607	0.356653	0.347152	0.337178	0.383653	0.350959		0.0892937	0.0852161	0.0847534	0.0812657	0.100876	0.103982	0.139922	0.142458	0.107164
443	2.9149e-06	0.00129483	0.00743359	0.0172998	0.000111419	0.00405993	0.129266	0.122966	0.167603	0.159062	0.12548	0.11662	0.149704	0.146476		0.034201	0.0347714	0.0162253	0.0132035	0.0144449	0.0144206	0.0219783	0.0215655	0.135414	0.132142	0.0972902	0.0986934	0.132038	0.13685	0.10234	0.101686	0.291127	0.308249	0.355647	0.357727	0.348098	0.338195	0.38487	0.352119		0.0886989	0.0846479	0.084401	0.0808993	0.100397	0.103599	0.139062	0.141699	0.106174
444	2.71153e-06	0.00129892	0.00733988	0.0171871	0.000109885	0.00395452	0.128189	0.121717	0.165996	0.157543	0.124288	0.11548	0.148166	0.144973		0.034087	0.0346375	0.0160816	0.0131038	0.0142482	0.0143038	0.0217883	0.0214536	0.135618	0.132353	0.097246	0.0986993	0.132257	0.137142	0.102384	0.101738	0.291776	0.308885	0.356684	0.358802	0.349046	0.339217	0.386098	0.353287		0.0881147	0.0840891	0.0840526	0.080538	0.0999271	0.103218	0.138224	0.140956	0.105196
445	8.72049e-07	0.00130379	0.00725594	0.0170814	0.000108243	0.00385954	0.127096	0.120462	0.164378	0.156012	0.123083	0.114329	0.146621	0.143464		0.0339672	0.0345023	0.0159396	0.0130039	0.0140592	0.0141835	0.0215996	0.0213356	0.135826	0.132567	0.0972158	0.0987089	0.132487	0.137442	0.102435	0.101799	0.29241	0.309527	0.357709	0.35987	0.350008	0.340254	0.387348	0.354467		0.0875487	0.0835475	0.0837057	0.0801818	0.0994689	0.102832	0.137418	0.140234	0.104236
446	-4.5642e-06	0.00130939	0.00718633	0.0169849	0.000106461	0.00378171	0.125972	0.119191	0.162743	0.154457	0.121852	0.113156	0.145059	0.141942		0.0338382	0.034366	0.0157986	0.0129018	0.0138808	0.014054	0.0214105	0.0212062	0.13604	0.132786	0.0972055	0.0987222	0.132729	0.137753	0.10249	0.101872	0.293017	0.310176	0.358712	0.360921	0.350997	0.341314	0.388635	0.355663		0.0870087	0.0830307	0.0833577	0.0798305	0.0990257	0.102433	0.136657	0.139539	0.103301
447	-1.55579e-05	0.00131567	0.00713559	0.0168998	0.000104503	0.00372776	0.124803	0.117895	0.161088	0.152872	0.120582	0.11195	0.143472	0.140399		0.0336963	0.0342285	0.0156582	0.0127954	0.0137157	0.0139099	0.0212194	0.0210597	0.13626	0.133008	0.0972213	0.0987396	0.132986	0.138078	0.102551	0.101962	0.293583	0.310833	0.359683	0.361944	0.352024	0.342408	0.38997	0.356878		0.0865024	0.0825464	0.0830061	0.0794839	0.0986008	0.102014	0.13595	0.138874	0.102398
448	-2.59789e-05	0.00133274	0.00710689	0.0168368	0.000102598	0.00368846	0.123616	0.11659	0.1594	0.151256	0.119296	0.110725	0.141857	0.138843		0.0335454	0.0340916	0.0155217	0.0127004	0.0135627	0.0137656	0.021033	0.0209103	0.136512	0.133267	0.0972635	0.0987623	0.133276	0.138427	0.102639	0.10208	0.294183	0.311542	0.360685	0.363007	0.3531	0.34356	0.391375	0.358151		0.0860247	0.0820829	0.0826664	0.0791545	0.0982014	0.101597	0.135311	0.138258	0.101515
449	-2.94986e-05	0.00136738	0.00709718	0.0168007	0.000100955	0.00365018	0.122444	0.115299	0.157675	0.149621	0.118024	0.109501	0.140221	0.137288		0.0333922	0.0339563	0.0153919	0.0126294	0.0134179	0.013637	0.0208576	0.0207731	0.136812	0.133587	0.0973254	0.0987912	0.133611	0.138804	0.102773	0.102229	0.294879	0.312328	0.36177	0.364167	0.354222	0.344776	0.392848	0.359504		0.0855636	0.0816237	0.0823515	0.0788507	0.0978287	0.101203	0.134734	0.137696	0.100638
450	-2.77797e-05	0.00141454	0.0071017	0.0167842	9.95091e-05	0.00361304	0.121286	0.114018	0.155923	0.147973	0.116762	0.10828	0.138572	0.135736		0.0332372	0.0338217	0.0152675	0.012576	0.0132799	0.0135203	0.020691	0.0206449	0.137146	0.133951	0.0974024	0.0988252	0.133978	0.139202	0.102939	0.1024	0.295644	0.313168	0.362912	0.365395	0.355374	0.346037	0.394369	0.360915		0.0851161	0.0811694	0.0820554	0.0785662	0.0974764	0.100828	0.134205	0.137174	0.0997675
451	-2.24851e-05	0.0014692	0.00711568	0.0167804	9.81935e-05	0.00357716	0.120137	0.112747	0.154155	0.146317	0.115509	0.107061	0.136916	0.134188		0.0330808	0.0336868	0.0151472	0.012534	0.0131475	0.0134121	0.020531	0.0205224	0.137502	0.134342	0.0974899	0.0988634	0.134366	0.139613	0.103127	0.102586	0.296448	0.31404	0.364087	0.366663	0.356541	0.347322	0.395918	0.36236		0.0846795	0.0807205	0.0817718	0.0782945	0.0971382	0.100464	0.13371	0.136682	0.0989044
452	-1.52775e-05	0.0015263	0.00713436	0.0167819	9.69429e-05	0.00354267	0.118994	0.111485	0.152379	0.144659	0.114261	0.105848	0.135262	0.132647		0.0329234	0.0335508	0.0150297	0.0124969	0.0130192	0.0133086	0.0203752	0.0204023	0.137866	0.134744	0.0975834	0.0989049	0.134764	0.14003	0.103325	0.102778	0.297262	0.314921	0.365268	0.367944	0.35771	0.348611	0.397476	0.363818		0.0842506	0.0802776	0.0814948	0.0780291	0.0968079	0.100108	0.133235	0.136206	0.09805
453	-7.81986e-06	0.00158081	0.00715298	0.0167818	9.56916e-05	0.00350969	0.117853	0.110228	0.150607	0.143007	0.113015	0.10464	0.133616	0.131114		0.0327657	0.0334127	0.0149138	0.0124585	0.012894	0.0132064	0.0202213	0.0202813	0.138225	0.135138	0.0976781	0.0989488	0.135161	0.140444	0.103521	0.102968	0.298058	0.315788	0.366431	0.36921	0.358866	0.349885	0.399023	0.365265		0.0838267	0.0798412	0.0812182	0.0777638	0.0964792	0.099751	0.132767	0.135736	0.0972052
454	-1.77491e-06	0.00162768	0.00716678	0.0167729	9.43739e-05	0.00347833	0.116712	0.108977	0.148848	0.141364	0.11177	0.10344	0.131988	0.12959		0.032608	0.0332715	0.0147982	0.0124125	0.0127703	0.0131018	0.0200673	0.0201561	0.138564	0.135509	0.0977696	0.0989941	0.135544	0.140849	0.103704	0.103147	0.298805	0.316616	0.367549	0.370431	0.359994	0.351124	0.400539	0.366679		0.0834047	0.0794117	0.0809358	0.077492	0.0961458	0.099389	0.132291	0.135257	0.0963712
455	1.19452e-06	0.00166189	0.00717099	0.016748	9.29241e-05	0.00344873	0.115566	0.107729	0.147112	0.139738	0.110522	0.102247	0.130383	0.128077		0.0324508	0.0331264	0.0146816	0.0123524	0.0126469	0.0129913	0.0199107	0.0200233	0.138871	0.135837	0.0978531	0.09904	0.135903	0.141238	0.103861	0.103308	0.299474	0.317383	0.368595	0.371578	0.361081	0.352309	0.402005	0.368037		0.0829819	0.0789899	0.0806417	0.0772075	0.0958015	0.0990154	0.131794	0.13476	0.0955488
456	-5.74382e-07	0.00167838	0.00716087	0.0167002	9.12765e-05	0.00342099	0.114413	0.106483	0.14541	0.138133	0.109269	0.101064	0.128809	0.126577		0.0322946	0.0329764	0.0145628	0.012272	0.0125226	0.0128711	0.0197493	0.0198797	0.139132	0.136108	0.0979243	0.0990854	0.136227	0.141602	0.103982	0.103442	0.300036	0.318066	0.369543	0.372622	0.362112	0.353418	0.403401	0.369316		0.0825551	0.0785762	0.0803296	0.0769037	0.09544	0.0986244	0.131261	0.134231	0.0947393
457	-3.73814e-06	0.00168464	0.0071469	0.0166467	8.94075e-05	0.00340006	0.113243	0.105232	0.143699	0.136522	0.108003	0.0998795	0.127242	0.125083		0.0321346	0.0328163	0.0144424	0.0121801	0.0124058	0.0127508	0.0195911	0.0197265	0.139385	0.136365	0.0980136	0.0991476	0.136563	0.141981	0.104108	0.103586	0.300588	0.318765	0.37049	0.373667	0.363163	0.354543	0.404823	0.370613		0.0821393	0.0781751	0.0800152	0.0765977	0.0950823	0.0982271	0.130728	0.133698	0.0939524
458	-4.24067e-06	0.00169125	0.00714148	0.0166076	8.73574e-05	0.0033892	0.112052	0.103976	0.141943	0.134877	0.106722	0.0986838	0.125656	0.123587		0.0319671	0.0326435	0.0143221	0.0120896	0.0123038	0.0126406	0.0194439	0.0195682	0.139669	0.136661	0.0981475	0.0992397	0.136959	0.142409	0.104282	0.103774	0.30123	0.319579	0.371531	0.374817	0.364304	0.355765	0.406361	0.37202		0.0817476	0.0777891	0.0797158	0.0763082	0.0947499	0.0978376	0.130233	0.133193	0.0931943
459	-2.67588e-06	0.00169776	0.00714265	0.0165792	8.51562e-05	0.00338609	0.110848	0.102718	0.140153	0.133209	0.105431	0.0974818	0.124058	0.122093		0.0317939	0.0324607	0.014202	0.0119997	0.0122132	0.0125381	0.0193052	0.0194056	0.139975	0.136983	0.098315	0.0993541	0.137399	0.142874	0.10449	0.103995	0.301935	0.320473	0.372638	0.37604	0.365508	0.357056	0.40798	0.373504		0.0813753	0.0774157	0.079428	0.0760312	0.0944369	0.0974543	0.129768	0.132711	0.0924601
460	3.62304e-07	0.00170374	0.00714844	0.0165581	8.28338e-05	0.00338841	0.109637	0.101461	0.138342	0.131527	0.104135	0.0962781	0.122456	0.120603		0.0316169	0.0322707	0.0140821	0.0119098	0.0121308	0.012441	0.0191723	0.01924	0.140295	0.137321	0.0985047	0.0994837	0.137868	0.143361	0.104722	0.104237	0.302674	0.321415	0.373781	0.377305	0.366746	0.358384	0.409646	0.375035		0.0810174	0.0770523	0.0791485	0.0757626	0.0941376	0.0970755	0.129324	0.132246	0.0917452
461	4.27998e-06	0.00170873	0.00715689	0.0165406	8.04201e-05	0.0033938	0.108425	0.10021	0.136524	0.129842	0.102839	0.0950772	0.120857	0.11912		0.0314377	0.0320762	0.0139626	0.0118191	0.0120533	0.012347	0.0190427	0.0190724	0.140619	0.137664	0.0987057	0.099621	0.13835	0.143858	0.104964	0.104487	0.30342	0.322372	0.374932	0.378582	0.367992	0.359722	0.411327	0.37658		0.080669	0.0766965	0.0788739	0.0754983	0.0938463	0.0966995	0.128894	0.131791	0.0910447
462	8.48324e-06	0.00171231	0.00716606	0.0165232	7.79452e-05	0.00339996	0.107219	0.098967	0.13471	0.128164	0.101549	0.0938837	0.119269	0.117647		0.0312583	0.0318799	0.0138434	0.011727	0.0119774	0.0122537	0.0189137	0.018904	0.140937	0.137999	0.0989068	0.0997587	0.138829	0.144351	0.105204	0.104735	0.304145	0.323309	0.37606	0.379839	0.369218	0.361039	0.412989	0.378108		0.0803251	0.0763458	0.0786008	0.0752342	0.0935571	0.0963246	0.12847	0.131341	0.0903538
463	1.23782e-05	0.00171403	0.00717396	0.0165024	7.54391e-05	0.00340454	0.106024	0.0977369	0.132915	0.126503	0.100269	0.0927022	0.117697	0.116185		0.0310806	0.0316845	0.0137248	0.0116327	0.0118997	0.0121589	0.018783	0.0187357	0.141241	0.138317	0.0990968	0.0998895	0.13929	0.144827	0.105431	0.104967	0.30482	0.324194	0.377135	0.381044	0.370398	0.362305	0.414599	0.379586		0.0799809	0.0759977	0.0783258	0.0749663	0.0932643	0.0959493	0.128042	0.13089	0.0896678
464	1.53709e-05	0.00171346	0.00717866	0.0164747	7.29318e-05	0.00340521	0.104848	0.096523	0.13115	0.12487	0.0990045	0.0915372	0.116151	0.114739		0.0309062	0.0314929	0.0136067	0.0115356	0.0118171	0.0120601	0.0186478	0.0185687	0.14152	0.138606	0.0992646	0.100006	0.139717	0.145272	0.105631	0.105173	0.305416	0.324991	0.378128	0.382164	0.371502	0.363491	0.416122	0.380984		0.0796314	0.0756497	0.0780455	0.0746906	0.0929621	0.0955718	0.127603	0.130432	0.0889819
465	1.68674e-05	0.00171016	0.00717818	0.0164365	7.04531e-05	0.00339965	0.103697	0.0953287	0.129429	0.123274	0.0977611	0.0903934	0.114637	0.11331		0.0307371	0.0313076	0.0134892	0.011435	0.0117263	0.0119552	0.0185055	0.0184041	0.141767	0.138854	0.0993992	0.100101	0.140094	0.145673	0.105793	0.10534	0.305906	0.325666	0.379007	0.383167	0.372505	0.364567	0.417525	0.382268		0.0792717	0.0752992	0.0777565	0.0744028	0.0926448	0.0951905	0.127144	0.129961	0.0882913
466	1.62739e-05	0.00170368	0.00717057	0.0163842	6.80332e-05	0.00338551	0.102575	0.0941576	0.127764	0.121725	0.0965436	0.0892753	0.113162	0.111901		0.030575	0.0311315	0.0133725	0.0113301	0.0116238	0.0118417	0.0183537	0.018243	0.14197	0.139051	0.0994894	0.100167	0.140407	0.146017	0.105904	0.105457	0.306259	0.326185	0.379742	0.38402	0.373379	0.365503	0.418775	0.383409		0.0788969	0.0749438	0.0774555	0.0740991	0.0923066	0.0948038	0.126657	0.129472	0.0875913
467	1.40968e-05	0.00168968	0.00716133	0.0163213	6.48993e-05	0.00336244	0.101461	0.0929902	0.126107	0.120188	0.0953248	0.088158	0.111703	0.110494		0.0304213	0.0309589	0.0132584	0.0112163	0.0115177	0.0117281	0.0181976	0.0180804	0.142158	0.139218	0.0995736	0.100238	0.140705	0.146354	0.106005	0.105563	0.306563	0.326659	0.380425	0.384834	0.374234	0.36641	0.420007	0.384522		0.0785178	0.0745913	0.0771513	0.0737889	0.0919663	0.0944228	0.126165	0.128979	0.0868936
468	1.13566e-05	0.00166563	0.00715635	0.0162543	6.04965e-05	0.00333294	0.100329	0.0918095	0.124409	0.118627	0.0940807	0.0870194	0.110238	0.109071		0.0302746	0.0307831	0.0131483	0.0110912	0.0114171	0.0116227	0.0180441	0.0179119	0.142361	0.139386	0.0996904	0.100347	0.141039	0.146733	0.106136	0.105699	0.306907	0.327203	0.381153	0.385723	0.375174	0.367394	0.421349	0.385722		0.0781474	0.0742496	0.0768536	0.0734836	0.0916432	0.0940568	0.125693	0.128501	0.0862113
469	8.23101e-06	0.00163386	0.00715427	0.0161839	5.51816e-05	0.00329897	0.0991873	0.0906226	0.122686	0.117053	0.0928209	0.0858686	0.108771	0.107641		0.030133	0.0306048	0.0130414	0.0109578	0.0113206	0.0115234	0.0178927	0.0177392	0.14257	0.139549	0.0998288	0.100481	0.141397	0.14714	0.106286	0.105854	0.307269	0.327786	0.381901	0.386652	0.376166	0.368424	0.422758	0.386975		0.0777839	0.0739166	0.0765606	0.0731814	0.0913321	0.0937018	0.125236	0.128033	0.0855424
470	4.89733e-06	0.00159669	0.00715373	0.016111	4.93113e-05	0.0032625	0.0980438	0.0894365	0.120954	0.115477	0.0915553	0.0847146	0.107309	0.106212		0.0299944	0.0304249	0.0129366	0.0108193	0.0112268	0.0114279	0.0177429	0.0175642	0.142779	0.139705	0.0999778	0.10063	0.141765	0.147559	0.106446	0.106016	0.307627	0.328377	0.382645	0.387591	0.377173	0.369465	0.42419	0.388244		0.0774255	0.07359	0.0762701	0.0728806	0.091028	0.0933533	0.124788	0.127573	0.0848845
471	1.53305e-06	0.00155645	0.00715335	0.0160364	4.32423e-05	0.00322548	0.0969058	0.0882583	0.119226	0.113908	0.0902939	0.0835665	0.105859	0.104792		0.0298569	0.0302441	0.0128332	0.0106788	0.0111343	0.0113339	0.0175941	0.0173886	0.142981	0.13985	0.100126	0.10078	0.142129	0.147975	0.106603	0.106175	0.307958	0.328944	0.38336	0.388505	0.37816	0.370485	0.425603	0.389494		0.0770703	0.0732677	0.0759803	0.0725795	0.0907257	0.0930071	0.124344	0.127116	0.0842353
472	-1.68438e-06	0.00151544	0.00715178	0.0159609	3.73314e-05	0.00318989	0.0957804	0.0870947	0.117519	0.112357	0.0890462	0.0824334	0.104427	0.103388		0.0297186	0.0300634	0.0127304	0.0105392	0.0110416	0.0112392	0.0174461	0.0172142	0.143168	0.139981	0.100263	0.100922	0.142475	0.148373	0.106747	0.10632	0.308239	0.329456	0.384021	0.389362	0.379092	0.37145	0.426954	0.390689		0.0767167	0.0729476	0.0756892	0.0722765	0.0904201	0.092659	0.123899	0.126659	0.0835925
473	-4.5775e-06	0.001476	0.00714765	0.0158853	3.19352e-05	0.00315768	0.0946749	0.0859527	0.115848	0.110835	0.0878223	0.0813242	0.103018	0.102007		0.0295773	0.0298835	0.0126273	0.0104036	0.0109474	0.0111415	0.0172983	0.0170429	0.143332	0.140094	0.100378	0.101042	0.142791	0.148738	0.106866	0.106439	0.308448	0.329882	0.384603	0.390128	0.379933	0.372326	0.428199	0.391794		0.0763627	0.0726273	0.0753948	0.0719697	0.0901061	0.0923047	0.123448	0.126198	0.0829538
474	-6.96885e-06	0.00144044	0.00713959	0.0158104	2.74104e-05	0.00313081	0.0935964	0.0848389	0.114227	0.109352	0.0866319	0.080248	0.101639	0.100659		0.0294312	0.0297053	0.0125229	0.0102752	0.0108503	0.0110386	0.0171502	0.0168763	0.143467	0.140186	0.100459	0.101129	0.143062	0.149056	0.106951	0.106521	0.308563	0.330188	0.38508	0.39077	0.380649	0.373082	0.429294	0.392772		0.0760066	0.0723049	0.0750951	0.0716576	0.0897785	0.09194	0.122986	0.125731	0.082317
475	-8.68098e-06	0.00141109	0.00712624	0.015737	2.41139e-05	0.00311126	0.0925521	0.0837601	0.112672	0.107919	0.0854849	0.0792138	0.100297	0.0993511		0.0292783	0.0295295	0.0124165	0.010157	0.0107488	0.0109282	0.0170013	0.0167162	0.143566	0.140252	0.100495	0.101172	0.143276	0.14931	0.10699	0.106556	0.30856	0.330344	0.385428	0.391253	0.381203	0.373683	0.430198	0.39359		0.0756467	0.071978	0.0747881	0.0713383	0.0894323	0.0915605	0.122507	0.125253	0.0816797
476	-9.5749e-06	0.00137957	0.00710563	0.0156553	2.17906e-05	0.003096	0.0915299	0.0827027	0.111154	0.106514	0.0843578	0.0782079	0.0989783	0.0980625		0.0291281	0.029359	0.0123139	0.010044	0.0106461	0.0108108	0.016852	0.0165598	0.143656	0.140311	0.100507	0.101196	0.143461	0.149535	0.107007	0.106563	0.30849	0.330417	0.385705	0.391652	0.381687	0.374213	0.43103	0.394342		0.0752855	0.0716563	0.0744722	0.0710094	0.0890689	0.0911693	0.122021	0.12477	0.0810379
477	-9.73331e-06	0.00133765	0.00707767	0.0155573	1.98985e-05	0.00308085	0.0905138	0.0816501	0.109638	0.105109	0.0832239	0.0772109	0.0976677	0.0967714		0.0289897	0.0291948	0.0122201	0.00992963	0.0105459	0.0106887	0.0167032	0.0164032	0.143764	0.140378	0.10052	0.101232	0.143653	0.149768	0.107028	0.10657	0.308412	0.330486	0.385977	0.392051	0.3822	0.374763	0.431917	0.395133		0.0749269	0.0713487	0.0741479	0.0706707	0.088695	0.0907729	0.121541	0.124291	0.0803909
478	-9.31126e-06	0.00128781	0.00704379	0.0154467	1.83632e-05	0.00306604	0.0895046	0.0806041	0.108126	0.10371	0.0820879	0.0762238	0.0963674	0.095482		0.0288595	0.0290354	0.0121331	0.00981447	0.0104478	0.0105633	0.0165549	0.0162467	0.143882	0.140445	0.100531	0.101275	0.143845	0.150003	0.107049	0.106572	0.308316	0.330539	0.386232	0.392438	0.382721	0.375317	0.432832	0.395939		0.0745705	0.0710522	0.0738171	0.0703245	0.0883126	0.0903723	0.121065	0.123815	0.0797416
479	-8.4638e-06	0.00123253	0.00700547	0.0153271	1.71106e-05	0.00305179	0.0885036	0.0795665	0.106625	0.102318	0.0809548	0.0752474	0.0950793	0.0941988		0.0287346	0.0288789	0.012051	0.0096991	0.0103511	0.0104358	0.0164074	0.0160908	0.144001	0.140509	0.100537	0.101319	0.144031	0.150234	0.107065	0.106567	0.308192	0.330562	0.386458	0.392797	0.38323	0.375854	0.433743	0.396738		0.0742163	0.0707639	0.0734816	0.0699729	0.0879239	0.0899686	0.120592	0.123341	0.0790929
480	-7.346e-06	0.00117431	0.00696415	0.0152023	1.60666e-05	0.00303833	0.0875116	0.0785391	0.105137	0.100939	0.0798292	0.0742827	0.0938055	0.092926		0.0286115	0.0287236	0.0119717	0.0095841	0.0102552	0.0103074	0.0162609	0.0159358	0.144112	0.140562	0.100535	0.101358	0.144205	0.150454	0.107072	0.106551	0.30803	0.330544	0.386642	0.393113	0.383707	0.376357	0.434623	0.397507		0.073864	0.0704808	0.0731431	0.069618	0.087531	0.0895629	0.120121	0.122868	0.0784479
481	-6.11291e-06	0.00111561	0.00692128	0.0150758	1.51568e-05	0.00302587	0.0865297	0.0775237	0.103668	0.0995765	0.078716	0.0733306	0.092548	0.0916679		0.0284871	0.0285678	0.0118934	0.00947005	0.0101597	0.0101792	0.0161157	0.0157822	0.144205	0.1406	0.100522	0.101389	0.144362	0.150656	0.107066	0.10652	0.307819	0.330473	0.386771	0.393373	0.38413	0.376807	0.43544	0.398222		0.0735134	0.0701999	0.0728036	0.0692622	0.087136	0.0891561	0.11965	0.122396	0.0778094
482	-4.91958e-06	0.00105895	0.00687831	0.0149515	1.43072e-05	0.00301465	0.0855588	0.076522	0.102221	0.0982334	0.0776199	0.0723919	0.0913089	0.090429		0.0283582	0.0284098	0.0118141	0.00935753	0.010064	0.0100525	0.0159718	0.0156303	0.144272	0.140615	0.100495	0.101406	0.144496	0.150834	0.107041	0.106472	0.307551	0.330335	0.386834	0.393562	0.38448	0.377185	0.436167	0.398862		0.0731643	0.0699181	0.0724648	0.0689074	0.0867413	0.0887494	0.119177	0.121923	0.0771804
483	-3.92107e-06	0.00100679	0.0068367	0.0148328	1.34436e-05	0.00300487	0.0845999	0.0755358	0.1008	0.0969139	0.0765458	0.0714676	0.0900902	0.0892134		0.0282214	0.0282479	0.0117316	0.00924713	0.00996747	0.0099285	0.0158295	0.0154805	0.144305	0.140602	0.10045	0.101404	0.144601	0.150982	0.106993	0.106403	0.307214	0.330119	0.386817	0.393665	0.384735	0.377473	0.436772	0.399403		0.0728164	0.0696324	0.0721285	0.0685559	0.0863487	0.0883437	0.118702	0.121449	0.0765639
484	-3.27244e-06	0.000961627	0.0067979	0.0147237	1.24917e-05	0.00299678	0.083654	0.0745667	0.0994102	0.0956217	0.0754985	0.0705586	0.088894	0.0880256		0.0280737	0.0280804	0.0116442	0.00913943	0.00986961	0.00980836	0.0156891	0.0153333	0.144293	0.140556	0.100386	0.101378	0.14467	0.151093	0.106918	0.10631	0.306799	0.329811	0.386709	0.393668	0.384875	0.377652	0.437228	0.399822		0.0724696	0.06934	0.0717964	0.0682099	0.0859607	0.0879402	0.118223	0.120973	0.0759628
485	-3.12875e-06	0.000925948	0.00676335	0.0146276	1.13773e-05	0.00299058	0.082722	0.0736166	0.0980554	0.0943606	0.0744826	0.0696658	0.0877222	0.0868698		0.0279117	0.0279055	0.0115498	0.009035	0.00976985	0.0096933	0.0155507	0.0151889	0.144228	0.14047	0.100298	0.101321	0.144698	0.15116	0.106812	0.106189	0.306296	0.3294	0.386495	0.393557	0.38488	0.377704	0.437503	0.400097		0.0721236	0.0690377	0.0714705	0.0678715	0.0855792	0.0875399	0.117738	0.120495	0.07538
486	-3.14824e-06	0.000894092	0.00673089	0.014539	1.05865e-05	0.00298714	0.0818171	0.0726974	0.0967434	0.0931379	0.0735025	0.0688065	0.0865822	0.0857481		0.0277437	0.0277317	0.0114505	0.00893142	0.00966628	0.00957411	0.0154114	0.0150455	0.144153	0.140379	0.100201	0.101253	0.144706	0.151205	0.106688	0.106051	0.305742	0.328927	0.386225	0.393369	0.384809	0.377681	0.437698	0.400302		0.0717794	0.0687396	0.0711475	0.0675307	0.0851941	0.0871364	0.117246	0.120015	0.0748139
487	-2.92804e-06	0.000859499	0.00669751	0.0144498	1.05284e-05	0.00298671	0.0809466	0.0718146	0.0954747	0.0919537	0.0725553	0.0679912	0.0854764	0.0846567		0.0275788	0.0275667	0.01135	0.00882628	0.00955824	0.00944322	0.0152689	0.0149012	0.144105	0.140315	0.100107	0.101189	0.144716	0.15125	0.106564	0.105905	0.305172	0.328433	0.385941	0.393147	0.384727	0.377638	0.437914	0.400515		0.0714376	0.0684586	0.0708233	0.0671781	0.0847962	0.0867243	0.116749	0.119538	0.0742598
488	-2.53154e-06	0.000823302	0.00666345	0.0143605	1.10132e-05	0.00298864	0.0801027	0.0709602	0.094242	0.0908017	0.0716352	0.0672104	0.0843994	0.0835909		0.0274153	0.0274072	0.0112485	0.00872023	0.00944708	0.00930423	0.0151242	0.0147567	0.14407	0.140263	0.100011	0.101125	0.144719	0.151287	0.106434	0.105749	0.304575	0.327906	0.38563	0.392882	0.384618	0.377563	0.438122	0.400714		0.0710979	0.0681898	0.0704982	0.0668172	0.084389	0.086306	0.116248	0.119063	0.0737164
489	-2.02213e-06	0.000786635	0.00662894	0.0142712	1.18514e-05	0.00299227	0.0792774	0.0701263	0.093038	0.0896754	0.0707363	0.0664545	0.0833455	0.0825464		0.0272514	0.0272503	0.0111464	0.00861392	0.00933415	0.00916079	0.0149785	0.0146128	0.144033	0.140209	0.0999086	0.101056	0.14471	0.151311	0.106292	0.10558	0.30394	0.327334	0.385276	0.392564	0.384467	0.377442	0.438292	0.400877		0.0707599	0.0679283	0.0701724	0.0664513	0.0839758	0.0858838	0.115743	0.118588	0.073182
490	-1.4632e-06	0.000750631	0.0065942	0.0141822	1.28533e-05	0.00299695	0.0784631	0.069305	0.0918554	0.088568	0.0698528	0.065714	0.0823092	0.0815187		0.0270853	0.0270927	0.011044	0.00850798	0.00922081	0.00901652	0.0148329	0.0144702	0.143979	0.14014	0.0997942	0.100975	0.144681	0.151315	0.106135	0.105395	0.303256	0.326705	0.384866	0.392184	0.384259	0.377263	0.438395	0.400983		0.0704232	0.0676692	0.0698463	0.0660836	0.0835601	0.08546	0.115237	0.118113	0.0726551
491	-9.18131e-07	0.000716425	0.00655948	0.014094	1.38292e-05	0.00300203	0.0776521	0.0684885	0.0906869	0.0874733	0.0689788	0.0649794	0.0812852	0.0805033		0.0269152	0.0269315	0.0109415	0.00840307	0.00910839	0.00887504	0.0146884	0.0143296	0.143893	0.140042	0.0996632	0.100879	0.144626	0.151291	0.105958	0.105191	0.302511	0.326008	0.384383	0.391732	0.383977	0.377013	0.438402	0.40101		0.0700873	0.0674076	0.0695201	0.0657175	0.0831453	0.085037	0.114731	0.117639	0.0721342
492	-4.50317e-07	0.000685148	0.006525	0.0140067	1.45896e-05	0.00300684	0.0768368	0.0676691	0.0895252	0.0863846	0.0681086	0.0642412	0.0802678	0.0794957		0.0267394	0.0267636	0.0108394	0.00829982	0.00899825	0.00873997	0.0145462	0.0141918	0.14376	0.1399	0.0995106	0.100761	0.144538	0.151235	0.105755	0.104966	0.301694	0.325231	0.383815	0.3912	0.383607	0.376679	0.438285	0.400937		0.0697519	0.0671386	0.0691941	0.0653564	0.0827348	0.0846171	0.114227	0.117163	0.0716178
493	-1.23144e-07	0.000657936	0.00649099	0.0139207	1.49448e-05	0.00301074	0.0760096	0.0668391	0.0883631	0.0852954	0.0672362	0.0634898	0.0792515	0.0784914		0.0265562	0.0265857	0.0107379	0.00819889	0.00889173	0.00861495	0.0144073	0.0140575	0.143566	0.139702	0.0993316	0.100617	0.14441	0.151138	0.105522	0.104716	0.300795	0.324363	0.383146	0.390579	0.383132	0.376247	0.438013	0.400742		0.0694166	0.0668574	0.0688686	0.0650036	0.082332	0.0842027	0.113726	0.116686	0.0711043
494	0	0.000635921	0.00645769	0.0138363	1.47051e-05	0.00301307	0.075163	0.0659908	0.0871932	0.0841992	0.0663559	0.0627158	0.0782309	0.0774861		0.0263637	0.026395	0.0106373	0.00810091	0.00879019	0.0085036	0.0142729	0.0139275	0.143295	0.139433	0.0991212	0.100442	0.144234	0.150994	0.105254	0.104438	0.299803	0.323393	0.382362	0.389859	0.382539	0.375706	0.437558	0.400402		0.0690809	0.066559	0.0685438	0.0646624	0.0819404	0.0837962	0.113229	0.116207	0.0705923
495	0	0.000619272	0.00642678	0.013759	1.40068e-05	0.0030192	0.0743259	0.0651533	0.0860485	0.0831294	0.0654966	0.061951	0.0772364	0.0765076		0.0261658	0.0261982	0.0105363	0.00800736	0.00868901	0.00840124	0.0141389	0.0138018	0.142989	0.139137	0.0989019	0.100257	0.14404	0.15083	0.104973	0.104151	0.298758	0.32236	0.381513	0.389079	0.381859	0.375085	0.436987	0.39997		0.0687489	0.0662515	0.0682239	0.0643306	0.0815561	0.0833985	0.112734	0.115728	0.0701031
496	0	0.000606868	0.00639923	0.0136923	1.31398e-05	0.00303347	0.0735262	0.0643549	0.0849598	0.082116	0.0646848	0.061228	0.0762948	0.0755803		0.0259671	0.0260031	0.0104334	0.00791852	0.00858344	0.00830066	0.0140013	0.0136798	0.142693	0.138859	0.0986946	0.100086	0.143853	0.150671	0.1047	0.103868	0.297697	0.321306	0.380648	0.388275	0.381132	0.37442	0.436377	0.3995		0.0684236	0.0659454	0.0679113	0.0640031	0.0811728	0.0830076	0.112236	0.115252	0.0696533
497	0	0.000597907	0.00637422	0.0136337	1.21454e-05	0.00305375	0.072755	0.0635867	0.0839162	0.0811476	0.0639109	0.0605378	0.0753957	0.0746942		0.0257669	0.0258087	0.0103288	0.00783322	0.00847464	0.00820172	0.0138612	0.0135607	0.142396	0.138586	0.0984917	0.0999197	0.143665	0.150509	0.104428	0.103584	0.296609	0.320218	0.379754	0.387434	0.380352	0.373704	0.435715	0.398982		0.0681036	0.06564	0.067604	0.063679	0.0807901	0.0826217	0.111737	0.114777	0.0692339
498	0	0.00059159	0.00635088	0.0135806	1.10647e-05	0.00307786	0.0720035	0.0628401	0.082907	0.0802129	0.063165	0.0598712	0.0745284	0.0738391		0.0255644	0.0256134	0.0102228	0.0077503	0.00836377	0.00810428	0.0137196	0.0134437	0.142088	0.138308	0.0982857	0.0997509	0.143467	0.150334	0.104149	0.103292	0.295484	0.319086	0.378816	0.386546	0.379511	0.372929	0.434985	0.398406		0.0677872	0.0653344	0.0673	0.0633572	0.080408	0.0822389	0.111236	0.114303	0.068836
499	0	0.000587116	0.00632839	0.0135305	9.93875e-06	0.00310365	0.071263	0.0621065	0.0819212	0.0793005	0.0624374	0.0592194	0.0736824	0.0730051		0.025359	0.0254161	0.0101155	0.00766858	0.00825197	0.00800819	0.0135776	0.0133281	0.141759	0.138012	0.0980692	0.0995719	0.14325	0.15014	0.103856	0.102987	0.294311	0.317899	0.377822	0.385598	0.378602	0.372089	0.434175	0.397761		0.0674729	0.0650278	0.0669974	0.0630366	0.0800261	0.0818574	0.110734	0.11383	0.0684508
500	0	0.000583685	0.00630589	0.0134808	8.80881e-06	0.00312896	0.0705249	0.0613772	0.0809481	0.0783991	0.0617186	0.0585732	0.0728469	0.072182		0.0251499	0.0252155	0.010007	0.00758691	0.0081404	0.0079133	0.0134361	0.013213	0.141399	0.137686	0.0978346	0.0993753	0.143006	0.149918	0.103543	0.102661	0.293078	0.316645	0.376757	0.384577	0.37762	0.371177	0.433268	0.397035		0.0671589	0.0647193	0.0666941	0.0627164	0.0796442	0.0814753	0.110231	0.113356	0.0680694
501	0	0.000580495	0.00628255	0.013429	7.716e-06	0.00315164	0.0697804	0.0606437	0.079977	0.0774972	0.0609988	0.0579237	0.0720115	0.0713598		0.0249364	0.0250103	0.00989771	0.00750412	0.00803021	0.00781948	0.0132963	0.0130979	0.140998	0.137318	0.0975744	0.0991533	0.142726	0.14966	0.103202	0.10231	0.291776	0.315315	0.37561	0.383473	0.376558	0.370184	0.432252	0.396218		0.0668437	0.0644081	0.0663882	0.0623954	0.0792622	0.0810908	0.109729	0.112881	0.0676828
502	0	0.000576746	0.00625752	0.0133724	6.70147e-06	0.00316951	0.0690211	0.0598976	0.078997	0.0765834	0.0602682	0.0572619	0.0711656	0.0705284		0.0247177	0.0247992	0.00978767	0.00741904	0.00792255	0.00772657	0.0131593	0.0129818	0.140547	0.136897	0.0972811	0.0988983	0.142401	0.149356	0.102825	0.101926	0.290392	0.313897	0.374365	0.382274	0.375408	0.369105	0.431112	0.395299		0.0665258	0.0640933	0.0660777	0.0620727	0.0788798	0.080702	0.109226	0.112404	0.0672822
503	0	0.000571639	0.00622996	0.0133086	5.80637e-06	0.00318043	0.0682385	0.0591305	0.0779972	0.0756465	0.0595173	0.0565788	0.0702985	0.0696777		0.0244933	0.0245809	0.00967711	0.00733051	0.00781857	0.00763443	0.013026	0.0128641	0.140035	0.136411	0.0969473	0.0986027	0.142024	0.149	0.102407	0.101505	0.288918	0.312382	0.373012	0.380969	0.374164	0.367932	0.429834	0.394267		0.0662034	0.063774	0.0657605	0.0617472	0.0784967	0.0803071	0.108725	0.111925	0.0668587
504	0	0.000564372	0.00619904	0.0132349	5.07186e-06	0.00318224	0.0674241	0.0583339	0.076967	0.074675	0.0587362	0.0558653	0.0693996	0.0687977		0.0242623	0.0243541	0.00956621	0.00723736	0.00771943	0.00754292	0.0128975	0.0127439	0.139453	0.135848	0.0965653	0.0982589	0.141584	0.148582	0.101939	0.101039	0.287343	0.310758	0.371537	0.379546	0.37282	0.366658	0.428403	0.393111		0.0658751	0.0634495	0.0654348	0.0614179	0.0781129	0.0799041	0.108224	0.111442	0.0664034
505	0	0.000556739	0.00616535	0.0131596	4.18867e-06	0.00318449	0.0666005	0.0575318	0.0759413	0.0737032	0.0579512	0.0551442	0.0685037	0.0679247		0.0240227	0.0241197	0.00945745	0.00714502	0.007626	0.00745929	0.0127789	0.0126291	0.138829	0.135248	0.0961656	0.0979016	0.141118	0.148141	0.101448	0.100552	0.285708	0.309073	0.37	0.37806	0.371396	0.365313	0.426854	0.391873		0.0655549	0.0631241	0.0651105	0.061097	0.0777385	0.0795029	0.107737	0.110967	0.0659443
506	0	0.00055085	0.00613017	0.0130912	2.90445e-06	0.00319612	0.0657927	0.0567498	0.074956	0.072767	0.0571911	0.0544412	0.0676459	0.0670945		0.023774	0.0238799	0.00935234	0.00705857	0.00753756	0.00738861	0.0126725	0.0125258	0.138196	0.134651	0.095777	0.0975627	0.140659	0.147712	0.100959	0.100066	0.284054	0.307367	0.368456	0.376564	0.369912	0.363925	0.425227	0.390594		0.065254	0.0628015	0.0647968	0.0607936	0.0773809	0.0791121	0.107272	0.110508	0.0655106
507	0	0.000546377	0.00609368	0.0130272	1.34567e-06	0.003214	0.0649961	0.0559825	0.0740016	0.0718578	0.0564499	0.0537516	0.0668168	0.0662963		0.0235178	0.0236353	0.0092497	0.00697638	0.00745292	0.0073275	0.0125751	0.0124307	0.137546	0.134048	0.09539	0.0972305	0.140195	0.147281	0.100464	0.0995752	0.28237	0.305628	0.366887	0.375037	0.368364	0.362484	0.423514	0.38926		0.0649664	0.06248	0.06449	0.0605025	0.0770348	0.0787281	0.106822	0.110058	0.0650947
508	0	0.000542991	0.00605602	0.0129653	-3.61194e-07	0.00323503	0.0642061	0.0552245	0.0730683	0.0709669	0.0557218	0.0530707	0.066007	0.0655196		0.0232561	0.0233867	0.00914832	0.00689678	0.00737087	0.00727256	0.0124835	0.0123406	0.136872	0.133426	0.0949949	0.0968933	0.139715	0.146837	0.0999565	0.0990719	0.280645	0.303843	0.365272	0.373464	0.366747	0.360982	0.42171	0.38786		0.0646861	0.0621578	0.0641864	0.0602183	0.076695	0.0783475	0.106379	0.109613	0.0646893
509	0	0.000540367	0.00601737	0.0129032	-2.08965e-06	0.00325608	0.063418	0.0544706	0.0721465	0.0700857	0.0550006	0.052394	0.065207	0.0647535		0.0229904	0.0231346	0.009047	0.00681814	0.00729023	0.00722037	0.0123947	0.0122522	0.136167	0.132775	0.0945821	0.0965392	0.13921	0.146366	0.0994286	0.0985492	0.278866	0.301998	0.363594	0.371827	0.365055	0.359409	0.419808	0.38638		0.0644072	0.0618333	0.0638822	0.0599357	0.0763565	0.0779669	0.105937	0.109169	0.064287
510	0	0.000538175	0.00597789	0.0128385	-3.71323e-06	0.00327405	0.0626274	0.0537154	0.0712267	0.0692055	0.0542807	0.0517169	0.0644073	0.0639874		0.0227224	0.0228797	0.00894455	0.00673879	0.00720978	0.00716756	0.0123054	0.0121622	0.135425	0.132085	0.0941418	0.0961566	0.138667	0.145856	0.0988727	0.0980001	0.277024	0.300083	0.361834	0.370108	0.363284	0.357756	0.417801	0.384808		0.0641236	0.0615047	0.0635739	0.0596494	0.076014	0.0775826	0.105489	0.108719	0.0638802
511	0	0.000536089	0.00593774	0.0127688	-5.10545e-06	0.00328582	0.0618298	0.0529538	0.0702993	0.0683176	0.0535559	0.0510347	0.0635984	0.0632105		0.0224541	0.0226227	0.00883975	0.00665708	0.00712832	0.00711071	0.0122126	0.0120675	0.134638	0.131345	0.0936645	0.0957338	0.138075	0.145294	0.0982815	0.0974176	0.275108	0.298083	0.359975	0.368292	0.361429	0.356013	0.415683	0.383131		0.0638294	0.0611703	0.0632577	0.0593541	0.0756623	0.0771913	0.105027	0.108258	0.0634616
512	0	0.000533781	0.00589708	0.0126918	-6.13982e-06	0.00328827	0.0610206	0.0521804	0.0693545	0.0674134	0.0528203	0.0503429	0.062771	0.0624122		0.0221869	0.0223643	0.00873141	0.00657138	0.00704467	0.00704642	0.0121131	0.0119648	0.1338	0.130544	0.0931406	0.0952589	0.137424	0.144668	0.0976473	0.0967947	0.273107	0.295988	0.357997	0.366361	0.359484	0.354171	0.413448	0.381336		0.0635186	0.0608283	0.0629299	0.0590446	0.0752964	0.0767894	0.104545	0.107782	0.0630237
513	0	0.000530922	0.00585607	0.0126052	-6.68988e-06	0.00327829	0.0601955	0.0513902	0.0683828	0.0664841	0.0520681	0.0496367	0.0619154	0.0615816		0.0219227	0.0221051	0.00861834	0.00648001	0.00695761	0.00697131	0.0120036	0.0118507	0.132903	0.129671	0.0925602	0.0947202	0.136703	0.143965	0.0969627	0.0961245	0.271011	0.293785	0.355885	0.364301	0.357445	0.352221	0.411088	0.37941		0.0631851	0.0604771	0.0625868	0.0587153	0.074911	0.0763735	0.104035	0.107285	0.0625591
514	0	0.000528903	0.00581372	0.0125106	-7.33605e-06	0.00325666	0.0593502	0.0505795	0.067402	0.0655414	0.0513059	0.0489178	0.0610461	0.0607366		0.0216507	0.0218373	0.00850452	0.00638718	0.0068741	0.00689548	0.0118969	0.0117347	0.131959	0.128744	0.0919407	0.0941443	0.135934	0.143212	0.0962344	0.0954184	0.268844	0.291505	0.353681	0.362156	0.355313	0.350171	0.408594	0.377374		0.0628455	0.060127	0.0622364	0.0583833	0.0745203	0.075953	0.103522	0.106786	0.062082
515	0	0.000529019	0.00576918	0.0124114	-8.60452e-06	0.00322729	0.0584866	0.0497512	0.0664344	0.0646022	0.0505447	0.0481922	0.0601829	0.0599005		0.0213614	0.0215548	0.00839408	0.00629752	0.00680027	0.00682962	0.0118051	0.0116267	0.130979	0.127784	0.0913039	0.0935621	0.135145	0.142443	0.0954748	0.0946917	0.266633	0.289185	0.351436	0.359976	0.353092	0.348036	0.405965	0.375254		0.0625176	0.0597872	0.0618881	0.0580659	0.0741394	0.0755381	0.10303	0.106305	0.0616102
516	0	0.000530808	0.00572282	0.0123083	-1.02875e-05	0.00319179	0.0576092	0.04891	0.0654776	0.0636665	0.0497848	0.0474617	0.0593249	0.0590716		0.0210588	0.0212608	0.00828601	0.00621011	0.00673371	0.00677116	0.0117242	0.0115244	0.129966	0.126792	0.090648	0.0929683	0.134332	0.141652	0.0946851	0.0939432	0.264376	0.286819	0.349141	0.357752	0.350785	0.34582	0.40321	0.373049		0.0621973	0.059454	0.0615404	0.0577584	0.073765	0.0751267	0.102552	0.105835	0.0611416
517	0	0.000533807	0.00567501	0.012202	-1.2177e-05	0.00315177	0.0567225	0.0480607	0.0645291	0.0627337	0.0490264	0.0467283	0.058471	0.058248		0.0207468	0.0209585	0.00817931	0.00612398	0.006672	0.00671753	0.0116503	0.0114256	0.128917	0.125764	0.0899707	0.0923578	0.13349	0.140833	0.0938665	0.0931717	0.26207	0.284402	0.346791	0.355476	0.348397	0.343522	0.400339	0.370758		0.0618807	0.0591236	0.0611917	0.0574563	0.0733937	0.0747164	0.102082	0.105371	0.0606739
518	0	0.000537552	0.00562615	0.012093	-1.40653e-05	0.00310885	0.055831	0.047208	0.0635863	0.0618037	0.0482699	0.0459938	0.0576203	0.0574278		0.0204293	0.0206511	0.00807296	0.0060382	0.00661272	0.00666618	0.0115796	0.011328	0.127834	0.124702	0.0892701	0.0917254	0.132616	0.139981	0.0930202	0.092376	0.259713	0.281929	0.344379	0.353138	0.345931	0.341147	0.397362	0.36838		0.0615635	0.0587925	0.0608406	0.0571548	0.0730221	0.0743049	0.101613	0.104907	0.0602051
519	0	0.00054158	0.00557659	0.0119821	-1.57446e-05	0.00306463	0.0549392	0.0463566	0.0626469	0.0608762	0.0475156	0.0452601	0.0567717	0.056609		0.0201103	0.0203418	0.00796596	0.00595181	0.00655345	0.00661455	0.0115082	0.0112293	0.126715	0.123604	0.0885438	0.0910659	0.131704	0.139091	0.0921474	0.0915548	0.257303	0.279397	0.341898	0.35073	0.343389	0.338695	0.394286	0.365915		0.0612419	0.0584567	0.0604854	0.0568494	0.072647	0.0738901	0.101138	0.104437	0.0597331
520	0	0.000545428	0.00552672	0.0118697	-1.7007e-05	0.00302072	0.0540513	0.045511	0.0617081	0.0599509	0.0467639	0.0445292	0.0559243	0.05579		0.0197937	0.0200337	0.00785729	0.00586388	0.00649177	0.00656006	0.0114321	0.0111274	0.12556	0.12247	0.08779	0.0903743	0.130752	0.138158	0.0912492	0.0907068	0.254836	0.276801	0.339342	0.348245	0.340774	0.336168	0.391121	0.36336		0.0609117	0.0581127	0.0601248	0.0565355	0.0722648	0.0734698	0.100651	0.103956	0.0592555
521	0	0.000548632	0.00547691	0.0117567	-1.76446e-05	0.00297873	0.0531717	0.0446758	0.0607677	0.0590275	0.046015	0.043803	0.055077	0.0549687		0.0194832	0.01973	0.00774595	0.00577346	0.00642528	0.00650015	0.0113474	0.01102	0.12437	0.121297	0.0870064	0.0896453	0.129754	0.137175	0.0903269	0.089831	0.252312	0.274136	0.336706	0.345674	0.338091	0.333569	0.387877	0.360715		0.0605688	0.0577568	0.0597571	0.0562084	0.0718723	0.0730415	0.100144	0.103459	0.0587703
522	0	0.00055073	0.00542754	0.0116434	-1.74496e-05	0.00294028	0.0523048	0.0438555	0.0598229	0.0581057	0.0452693	0.0430833	0.0542289	0.0541434		0.0191829	0.0194339	0.00763092	0.0056796	0.00635154	0.00643226	0.0112503	0.0109048	0.123144	0.120087	0.0861909	0.0888737	0.128706	0.136139	0.0893816	0.088926	0.249728	0.271398	0.333982	0.343009	0.335342	0.330899	0.384563	0.35798		0.0602092	0.0573851	0.0593808	0.0558636	0.071466	0.0726031	0.0996111	0.102938	0.0582754
523	0	0.000551258	0.00537899	0.0115307	-1.62142e-05	0.00290697	0.0514549	0.0430548	0.0588714	0.0571852	0.044527	0.0423721	0.0533788	0.0533121		0.0188965	0.0191485	0.00751121	0.00558135	0.00626814	0.00635383	0.0111368	0.0107795	0.121881	0.118837	0.0853416	0.0880544	0.127605	0.135042	0.0884146	0.0879907	0.247081	0.268583	0.331165	0.340244	0.332531	0.328161	0.381188	0.355152		0.0598289	0.056994	0.0589945	0.0554963	0.0710426	0.0721524	0.0990456	0.10239	0.0577686
524	0	0.00055378	0.00533069	0.0114149	-1.42858e-05	0.0028671	0.0505866	0.0422375	0.0579053	0.0562532	0.0437759	0.0416512	0.0525155	0.0524643		0.0186072	0.0188561	0.00738204	0.00547461	0.00617757	0.00626796	0.011009	0.0106453	0.120557	0.117517	0.0844399	0.0871749	0.126437	0.133873	0.0873961	0.0870045	0.244347	0.26567	0.328242	0.337372	0.329592	0.32529	0.377641	0.352162		0.0594326	0.0565864	0.0585999	0.0551128	0.0706086	0.0716933	0.0984554	0.101826	0.0572475
525	0	0.000561272	0.00528188	0.011293	-1.21489e-05	0.002811	0.0496718	0.0413747	0.0569223	0.0553015	0.0430075	0.0409061	0.0516324	0.0515951		0.0182993	0.0185416	0.00724139	0.00535772	0.00608428	0.00617965	0.0108727	0.0105056	0.119155	0.116109	0.0834763	0.0862328	0.125199	0.132627	0.0863054	0.0859556	0.241513	0.262652	0.325211	0.334402	0.326481	0.322242	0.373836	0.348965		0.0590283	0.0561686	0.0582	0.0547225	0.0701723	0.071231	0.0978538	0.101263	0.056713
526	0	0.000572386	0.00523262	0.0111662	-9.80117e-06	0.00274326	0.0487256	0.0404814	0.0559284	0.0543369	0.0422278	0.0401448	0.0507361	0.0507113		0.0179786	0.0182115	0.00709237	0.00523341	0.00598876	0.00608918	0.0107298	0.0103613	0.11769	0.11463	0.0824618	0.0852388	0.123901	0.131318	0.0851566	0.0848554	0.238598	0.259548	0.322088	0.331347	0.323228	0.319048	0.369826	0.345599		0.0586168	0.055742	0.0577951	0.0543261	0.069733	0.0707652	0.0972419	0.100697	0.056168
527	0	0.000585773	0.00518295	0.0110359	-7.24015e-06	0.0026685	0.0477628	0.0395726	0.0549295	0.0533662	0.0414428	0.0393748	0.049833	0.0498196		0.0176509	0.0178725	0.00693809	0.00510438	0.00589154	0.00599683	0.010582	0.0102137	0.116176	0.113098	0.0814075	0.0842031	0.122552	0.129954	0.0839643	0.0837154	0.235619	0.256373	0.318891	0.328219	0.319864	0.315741	0.365659	0.342099		0.0581986	0.0553081	0.0573857	0.0539238	0.06929	0.0702957	0.0966209	0.100128	0.0556149
528	0	0.000600087	0.00513293	0.0109036	-4.46353e-06	0.00259134	0.0467982	0.038663	0.0539315	0.0523961	0.0406584	0.038604	0.0489299	0.0489267		0.0173219	0.0175313	0.00678165	0.00497337	0.00579312	0.00590289	0.010431	0.0100636	0.114629	0.11153	0.0803245	0.0831363	0.121162	0.128548	0.0827425	0.0825469	0.232593	0.253147	0.315635	0.325031	0.316419	0.312351	0.361386	0.338504		0.0577746	0.0548684	0.056972	0.0535163	0.0688427	0.0698221	0.0959917	0.0995519	0.0550567
529	0	0.00061398	0.00508262	0.0107705	-1.46896e-06	0.00251637	0.0458464	0.0377673	0.0529404	0.0514334	0.0398807	0.0378399	0.048033	0.0480395		0.0169975	0.0171944	0.00662616	0.00484308	0.005694	0.00580764	0.0102787	0.00991238	0.113061	0.109943	0.0792238	0.0820488	0.119741	0.127109	0.0815058	0.0813615	0.229536	0.249885	0.312335	0.321795	0.312924	0.30891	0.357058	0.334849		0.0573454	0.0544244	0.0565544	0.0531039	0.0683903	0.0693442	0.0953557	0.098967	0.054496
530	0	0.000626104	0.00503207	0.0106381	1.74592e-06	0.00244822	0.0449219	0.0369001	0.0519621	0.0504849	0.0391156	0.0370904	0.0471491	0.0471648		0.0166833	0.0168684	0.00647472	0.00471625	0.00559471	0.00571135	0.0101268	0.00976092	0.111488	0.108355	0.0781164	0.0809509	0.118299	0.125649	0.0802683	0.0801706	0.226466	0.246604	0.309005	0.318522	0.309411	0.305449	0.352724	0.331172		0.0569117	0.0539775	0.0561333	0.0526871	0.0679322	0.0688617	0.0947138	0.0983712	0.0539355
531	0	0.000635112	0.00498134	0.0105076	5.18347e-06	0.00239149	0.0440392	0.0360757	0.0510025	0.0495574	0.0383691	0.0363632	0.0462845	0.0463091		0.0163851	0.01656	0.00633045	0.00459558	0.00549573	0.00561432	0.00997707	0.00961037	0.109922	0.106782	0.0770133	0.0798532	0.116846	0.124178	0.0790444	0.0789856	0.223397	0.243319	0.305661	0.315224	0.305909	0.302	0.348435	0.32751		0.0564743	0.0535292	0.055709	0.0522665	0.0674677	0.0683743	0.0940672	0.0977621	0.0533778
532	0	0.000639655	0.00493049	0.0103805	8.84604e-06	0.00235079	0.0432125	0.0353085	0.0500675	0.0486576	0.0376472	0.035666	0.0454459	0.0454794		0.0161085	0.0162755	0.00619643	0.00448381	0.0053976	0.00551682	0.00983135	0.00946178	0.108378	0.10524	0.0759257	0.0787661	0.115391	0.122708	0.0778485	0.0778181	0.220346	0.240046	0.302316	0.311912	0.30245	0.298595	0.344241	0.323899		0.0560338	0.0530809	0.055282	0.0518424	0.0669962	0.0678817	0.093417	0.0971375	0.0528258
533	0	0.000640533	0.00487839	0.010251	1.32394e-05	0.00231986	0.0424112	0.03457	0.0491365	0.0477651	0.0369332	0.0349807	0.0446128	0.0446544		0.0158416	0.0160018	0.006066	0.00437514	0.0052966	0.00541478	0.00968324	0.0093088	0.106804	0.103672	0.074812	0.0776462	0.113886	0.121188	0.0766348	0.0766251	0.217237	0.23671	0.298898	0.308517	0.298922	0.295121	0.339988	0.320213		0.0555751	0.0526174	0.05484	0.0514013	0.0665047	0.0673706	0.0927427	0.0964818	0.0522639
534	0	0.000639593	0.0048241	0.0101135	1.87658e-05	0.0022894	0.0415976	0.0338241	0.0481873	0.0468575	0.036208	0.0342859	0.0437626	0.0438111		0.0155695	0.0157219	0.00593092	0.00426248	0.00518929	0.00530462	0.00952604	0.00914528	0.105149	0.10202	0.0736284	0.076449	0.112285	0.119567	0.0753536	0.0753616	0.214	0.233237	0.295337	0.304978	0.295208	0.291462	0.335507	0.316315		0.0550851	0.0521249	0.054373	0.0509317	0.0659832	0.0668307	0.0920267	0.0957845	0.0516772
535	0	0.000637056	0.00476792	0.00996913	2.52726e-05	0.00225944	0.0407752	0.0330737	0.0472236	0.045938	0.0354745	0.033584	0.0428989	0.0429532		0.0152936	0.0154373	0.00579202	0.00414655	0.00507655	0.00518739	0.00936097	0.00897264	0.103423	0.100293	0.0723828	0.0751831	0.110596	0.117856	0.0740127	0.0740358	0.210652	0.229648	0.291654	0.301313	0.291327	0.287636	0.330824	0.312227		0.0545679	0.0516073	0.0538841	0.0504373	0.0654357	0.0662658	0.0912741	0.0950507	0.0510691
536	0	0.000633142	0.00471013	0.00981896	3.26071e-05	0.00223002	0.0399473	0.0323215	0.0462493	0.04501	0.0347353	0.0328774	0.0420253	0.0420842		0.0150151	0.0151495	0.0056501	0.00402808	0.00495925	0.00506413	0.00918927	0.00879229	0.101636	0.0985021	0.0710831	0.0738571	0.108831	0.116065	0.0726201	0.0726559	0.207212	0.22596	0.287866	0.297542	0.287301	0.283665	0.325963	0.307973		0.0540276	0.0510683	0.0533769	0.049922	0.064866	0.0656799	0.0904906	0.0942856	0.0504433
537	0	0.000628074	0.00465103	0.00966417	4.06164e-05	0.00220118	0.0391173	0.0315705	0.0452682	0.044077	0.033993	0.0321685	0.0411452	0.0412078		0.0147354	0.01486	0.00550598	0.0039078	0.00483829	0.00493589	0.00901218	0.00860564	0.0997987	0.0966589	0.0697371	0.0724794	0.107	0.114206	0.0711837	0.07123	0.203696	0.222193	0.283992	0.293682	0.28315	0.279569	0.320951	0.303575		0.0534683	0.0505118	0.0528544	0.0493894	0.0642782	0.0650768	0.0896813	0.0934945	0.0498032
538	0	0.000622071	0.00459093	0.0095059	4.9148e-05	0.00217295	0.0382886	0.0308234	0.0442841	0.0431422	0.0332503	0.0314599	0.0402623	0.0403278		0.0144558	0.01457	0.00536045	0.00378644	0.00471453	0.00480371	0.00883094	0.00841412	0.0979199	0.0947736	0.0683527	0.0710587	0.105112	0.112288	0.0697114	0.0697662	0.200123	0.218364	0.280051	0.289751	0.278894	0.275368	0.315812	0.299056		0.0528939	0.0499417	0.0523201	0.0488432	0.063676	0.0644604	0.0888518	0.0926825	0.0491523
539	0	0.000615355	0.0045301	0.00934532	5.8049e-05	0.00214537	0.0374646	0.030083	0.0433006	0.0422092	0.0325099	0.0307539	0.03938	0.0394478		0.0141777	0.0142811	0.00521434	0.00366473	0.00458886	0.00466864	0.00864677	0.00821912	0.0960098	0.0928567	0.0669377	0.0696035	0.103178	0.110322	0.0682112	0.0682729	0.196507	0.214489	0.276058	0.285766	0.274553	0.271083	0.310573	0.29444		0.0523086	0.0493618	0.0517772	0.0482873	0.0630634	0.0638347	0.0880073	0.0918547	0.0484943
540	0	0.000608147	0.00446885	0.00918355	6.71667e-05	0.00211849	0.0366485	0.0293521	0.0423218	0.0412812	0.0317745	0.030053	0.0385019	0.0385714		0.0139024	0.0139947	0.00506845	0.0035434	0.00446215	0.00453172	0.00846092	0.00802207	0.0940781	0.0909183	0.0655	0.0681224	0.101209	0.108319	0.066691	0.0667581	0.192867	0.210587	0.272031	0.281745	0.27015	0.266734	0.30526	0.289749		0.0517165	0.048776	0.051229	0.0477252	0.0624442	0.0632034	0.0871532	0.0910165	0.0478326
541	0	0.000600669	0.00440748	0.00902175	7.63483e-05	0.00209232	0.0358436	0.0286334	0.0413513	0.0403616	0.0310468	0.0293596	0.0376315	0.0377023		0.0136312	0.0137121	0.00492359	0.00342317	0.0043353	0.004394	0.00827462	0.00782438	0.092134	0.0889687	0.0640474	0.066624	0.0992144	0.106289	0.0651588	0.06523	0.189216	0.206673	0.267986	0.277702	0.265703	0.26234	0.299896	0.285006		0.0511215	0.0481881	0.0506789	0.0471609	0.0618225	0.0625706	0.0862949	0.0901729	0.0471707
542	0	0.000593142	0.00434627	0.00886106	8.54413e-05	0.00206692	0.0350531	0.0279296	0.0403929	0.0394539	0.0303294	0.0286761	0.0367724	0.0368443		0.0133654	0.0134349	0.00478058	0.00330478	0.00420916	0.00425651	0.00808911	0.00762746	0.0901869	0.0870176	0.0625879	0.0651169	0.0972044	0.104243	0.0636224	0.0636968	0.185571	0.202762	0.263938	0.273654	0.261234	0.257923	0.294509	0.280234		0.0505278	0.0476019	0.0501301	0.046598	0.061202	0.06194	0.0854378	0.0893291	0.0465122
543	0	0.000585785	0.00428552	0.00870263	9.42928e-05	0.00204232	0.0342804	0.0272434	0.0394504	0.0385613	0.029625	0.0280051	0.0359281	0.0360008		0.0131064	0.0131644	0.00464022	0.00318895	0.00408464	0.00412031	0.00790562	0.00743273	0.0882459	0.0850749	0.0611292	0.0636095	0.0951893	0.102192	0.0620898	0.0621667	0.181944	0.19887	0.259902	0.269615	0.256762	0.253503	0.289124	0.275455		0.0499394	0.0470213	0.0495859	0.0460402	0.0605867	0.0613156	0.0845873	0.0884904	0.0458606
544	0	0.000578822	0.00422553	0.00854761	0.00010275	0.00201855	0.0335285	0.0265775	0.0385276	0.0376873	0.0289363	0.0273489	0.0351021	0.0351757		0.0128554	0.012902	0.00450333	0.00307641	0.00396259	0.00398643	0.00772538	0.00724161	0.0863198	0.08315	0.0596792	0.0621105	0.0931793	0.100145	0.0605689	0.0606477	0.178352	0.19501	0.255892	0.265601	0.25231	0.2491	0.283766	0.270694		0.0493604	0.0464502	0.0490496	0.0454912	0.0599805	0.0607014	0.0837487	0.087662	0.0452194
545	0	0.000572472	0.00416658	0.00839715	0.00011066	0.00199566	0.0328008	0.0259347	0.0376284	0.0368353	0.028266	0.0267099	0.0342979	0.0343726		0.0126137	0.0126491	0.00437071	0.00296789	0.00384392	0.00385593	0.00754964	0.00705549	0.0844174	0.0812524	0.0582459	0.0606285	0.0911848	0.0981133	0.0590677	0.0591482	0.174806	0.191197	0.251923	0.261623	0.247896	0.244735	0.27846	0.265973		0.0487949	0.0458924	0.0485245	0.0449549	0.0593872	0.0601011	0.0829273	0.0868489	0.0445921
546	0	0.000566958	0.00410899	0.00825239	0.000117871	0.00197368	0.0321004	0.0253175	0.0367565	0.0360086	0.0276167	0.0260907	0.0335191	0.0335952		0.0123828	0.0124072	0.00424318	0.00286412	0.00372948	0.00372984	0.00737962	0.0068758	0.0825474	0.0793914	0.0568369	0.0591719	0.0892159	0.0961078	0.057594	0.0576763	0.171321	0.187445	0.248008	0.257697	0.243542	0.240427	0.273234	0.261314		0.0482468	0.0453517	0.0480139	0.0444349	0.0588109	0.0595186	0.0821286	0.0860565	0.0439823
547	0	0.000562499	0.00405303	0.00811447	0.000124229	0.00195265	0.0314304	0.0247286	0.0359157	0.0352107	0.0269912	0.0254937	0.0327693	0.032847		0.0121638	0.0121776	0.00412154	0.00276583	0.00362018	0.00360921	0.00721657	0.00670396	0.0807182	0.0775759	0.0554603	0.0577494	0.0872828	0.0941389	0.0561559	0.0562401	0.167908	0.183766	0.244159	0.253834	0.239267	0.236198	0.268111	0.256741		0.0477203	0.044832	0.0475212	0.043935	0.0582553	0.058958	0.081358	0.0852898	0.0433935
548	0	0.000559318	0.00399901	0.00798455	0.000129582	0.00193261	0.030794	0.0241708	0.0351097	0.0344448	0.026392	0.0249213	0.0320519	0.0321319		0.011958	0.0119618	0.0040066	0.00267374	0.00351687	0.00349509	0.00706172	0.00654137	0.0789382	0.075815	0.0541239	0.0563696	0.0853958	0.092217	0.0547612	0.0548478	0.164581	0.180172	0.240389	0.250048	0.235094	0.232067	0.263117	0.252276		0.0472194	0.0443372	0.0470495	0.0434589	0.0577244	0.058423	0.0806207	0.0845542	0.0428292
549	0	0.000557635	0.00394722	0.00786376	0.000133778	0.00191359	0.0301943	0.0236465	0.0343425	0.0337144	0.025822	0.0243758	0.0313705	0.0314534		0.0117669	0.0117611	0.00389918	0.00258859	0.00342045	0.00338851	0.0069163	0.00638945	0.0772156	0.0741174	0.0528354	0.055041	0.0835651	0.0903528	0.0534179	0.0535076	0.161351	0.176677	0.236709	0.24635	0.231041	0.228055	0.258279	0.247943		0.0467483	0.043871	0.0466023	0.0430104	0.0572221	0.0579175	0.0799222	0.0838547	0.042293
550	0	0.000557671	0.00389796	0.00775327	0.000136662	0.00189562	0.0296345	0.0231585	0.0336177	0.0330229	0.0252836	0.0238599	0.0307287	0.0308152		0.0115916	0.0115769	0.00380009	0.0025111	0.00333179	0.00329053	0.00678156	0.00624962	0.0755584	0.0724918	0.0516028	0.0537722	0.0818009	0.0885567	0.0521339	0.0522276	0.15823	0.173291	0.233133	0.242751	0.22713	0.224183	0.253622	0.243764		0.0463109	0.0434373	0.0461828	0.0425932	0.0567523	0.0574455	0.0792679	0.0831965	0.0417883
551	0	0.000560621	0.00384654	0.00764604	0.000138707	0.00187907	0.0291025	0.0226995	0.0329132	0.0323504	0.0247628	0.0233592	0.0301111	0.0301978		0.0114288	0.0114043	0.00370822	0.00244039	0.00324346	0.00319362	0.00664691	0.00611273	0.0738789	0.0708556	0.0503627	0.0524932	0.0800026	0.0867275	0.0508456	0.0509422	0.155073	0.169863	0.22951	0.239101	0.223188	0.220276	0.24894	0.239546		0.045872	0.0430007	0.0457615	0.0421763	0.0562791	0.0569721	0.0786102	0.0825292	0.0412895
552	0	0.000566987	0.0037893	0.00753545	0.000140488	0.00186425	0.0285851	0.0222602	0.0322076	0.0316779	0.0242455	0.0228599	0.0295017	0.0295818		0.0112742	0.0112377	0.00362158	0.00237471	0.00314899	0.00309105	0.0065031	0.00597037	0.0721046	0.0691385	0.0490594	0.0511426	0.0780852	0.084779	0.0494966	0.0495933	0.151763	0.166272	0.225722	0.23528	0.219065	0.216185	0.244055	0.235119		0.0454011	0.0425306	0.0453131	0.0417327	0.0557719	0.0564673	0.0779079	0.0818101	0.0407734
553	0	0.000575952	0.00372806	0.00742324	0.000142015	0.00185113	0.0280835	0.0218402	0.0315062	0.0310104	0.0237346	0.0223655	0.0289029	0.0289714		0.0111276	0.0110775	0.00353964	0.00231346	0.00305074	0.00298506	0.00635339	0.00582502	0.0702653	0.067367	0.047712	0.0497419	0.0760821	0.0827448	0.0481063	0.0482008	0.148352	0.162573	0.221823	0.231344	0.214815	0.211964	0.239027	0.230546		0.0449093	0.0420384	0.044847	0.0412719	0.0552424	0.0559423	0.0771762	0.0810557	0.0402473
554	0	0.000586698	0.00366462	0.00731115	0.000143295	0.00183972	0.0275986	0.0214389	0.0308144	0.0303525	0.0232333	0.0218794	0.0283171	0.0283708		0.0109889	0.010924	0.0034619	0.00225607	0.00295103	0.00287789	0.00620099	0.00567915	0.0683909	0.0655676	0.0463399	0.0483124	0.0740268	0.0806582	0.0466937	0.0467845	0.144891	0.158818	0.217867	0.227347	0.210491	0.207666	0.23392	0.225885		0.0444076	0.0415357	0.0443729	0.0408033	0.0547022	0.0554084	0.0764302	0.080283	0.0397187
555	0	0.000598408	0.00360081	0.00720091	0.000144335	0.00183	0.0271317	0.0210559	0.0301374	0.0297091	0.0227445	0.021405	0.0277466	0.027784		0.0108576	0.0107777	0.00338783	0.00220196	0.00285221	0.00277178	0.00604916	0.00553524	0.0665106	0.0637661	0.0449624	0.0468755	0.071953	0.0785528	0.045278	0.0453643	0.141429	0.155061	0.213904	0.223341	0.206147	0.203347	0.228794	0.221198		0.0439071	0.0410337	0.0439001	0.0403364	0.054163	0.0548768	0.0756849	0.0795086	0.0391949
556	0	0.000610264	0.00353844	0.00709426	0.000145145	0.00182195	0.0266839	0.0206908	0.0294804	0.0290849	0.0222714	0.0209456	0.027194	0.0272152		0.0107338	0.0106389	0.00331691	0.00215054	0.00275662	0.00266897	0.00590112	0.00539576	0.0646529	0.0619879	0.0435986	0.0454525	0.0698941	0.0764621	0.0438784	0.0439599	0.138013	0.151351	0.209983	0.219377	0.201837	0.199059	0.223711	0.216544		0.0434189	0.040544	0.0434382	0.0398805	0.0536365	0.0543586	0.0749554	0.0787493	0.0386832
557	0	0.000621451	0.00347931	0.00699293	0.000145733	0.00181556	0.0262563	0.0203429	0.0288488	0.0284848	0.0218169	0.0205047	0.0266614	0.0266686		0.0106172	0.010508	0.00324863	0.00210124	0.00266659	0.00257168	0.00576012	0.0052632	0.0628462	0.060258	0.042268	0.0440649	0.0678838	0.0744195	0.0425139	0.0425911	0.13469	0.147736	0.206152	0.215503	0.197614	0.194858	0.218735	0.211984		0.0429541	0.040078	0.0429966	0.0394451	0.0531343	0.0538652	0.0742567	0.0780218	0.0381911
558	0	0.000631149	0.00342526	0.00689867	0.000146105	0.00181082	0.02585	0.020012	0.0282479	0.0279136	0.0213841	0.0200856	0.0261514	0.0261482		0.0105076	0.0103854	0.00318246	0.00205347	0.00258448	0.00248217	0.00562938	0.00514003	0.0611181	0.0586012	0.0409897	0.042734	0.0659554	0.0724584	0.0412039	0.0412779	0.131505	0.144264	0.202457	0.211768	0.193533	0.190797	0.213926	0.207579		0.0425238	0.039647	0.0425849	0.0390397	0.0526682	0.0534078	0.073604	0.077343	0.0377259
559	0	0.000638542	0.00337808	0.00681321	0.00014627	0.00180772	0.0254662	0.0196975	0.0276828	0.0273759	0.020976	0.0196917	0.0256662	0.0256583		0.0104048	0.0102715	0.00311789	0.00200665	0.00251261	0.00240267	0.00551215	0.00502872	0.0594959	0.0570417	0.039783	0.0414813	0.0641426	0.0706123	0.0399674	0.04004	0.1285	0.140981	0.198942	0.208215	0.189646	0.186931	0.209346	0.203388		0.0421391	0.0392625	0.0422126	0.0386738	0.0522497	0.0529976	0.0730123	0.0767295	0.0372949
560	0	0.000642813	0.0033396	0.00673828	0.000146236	0.00180624	0.025106	0.0193989	0.0271589	0.0268768	0.0205957	0.0193264	0.0252083	0.025203		0.0103086	0.0101667	0.0030544	0.0019602	0.00245334	0.00233542	0.00541166	0.00493177	0.0580068	0.0556036	0.0386672	0.040328	0.0624789	0.0689147	0.0388235	0.0388971	0.125718	0.137929	0.19565	0.20489	0.186008	0.183313	0.205058	0.199473		0.0418109	0.0389359	0.041889	0.0383567	0.0518905	0.0526458	0.0724966	0.0761981	0.0369056
561	0	0.000646498	0.00330803	0.00667394	0.000145304	0.00180798	0.0247806	0.0191313	0.0266767	0.0264149	0.0202434	0.0189884	0.0247814	0.0247832		0.010227	0.0100766	0.00299439	0.00191731	0.00240504	0.00227708	0.00532197	0.00484686	0.0565755	0.0542221	0.0375927	0.039221	0.0608682	0.0672668	0.0377245	0.0377993	0.123012	0.134949	0.192424	0.201627	0.182471	0.179794	0.200898	0.19567		0.0415225	0.0386464	0.0415947	0.0380716	0.0515682	0.0523275	0.0720318	0.0757182	0.0365423
562	0	0.000652223	0.00328007	0.00661817	0.000142994	0.00181396	0.0244959	0.0189049	0.0262299	0.0259839	0.0199154	0.0186728	0.0243847	0.0243948		0.0101656	0.0100046	0.00294009	0.00188073	0.00236387	0.00222276	0.00523534	0.00476954	0.0551199	0.0528257	0.0365042	0.0381	0.0592074	0.0655637	0.0366161	0.03669	0.120231	0.131883	0.189109	0.198264	0.178875	0.176211	0.196685	0.191802		0.0412496	0.0383665	0.0413053	0.0377962	0.0512539	0.0520129	0.0715835	0.0752497	0.0361858
563	0	0.000659305	0.00325524	0.00656961	0.000139646	0.00182331	0.0242451	0.0187124	0.0258144	0.0255804	0.0196094	0.0183776	0.0240148	0.024034		0.0101202	0.00994728	0.00289066	0.00184924	0.00232879	0.00217234	0.00515231	0.00469905	0.0536563	0.0514277	0.0354122	0.0369756	0.0575199	0.0638303	0.0355083	0.0355797	0.117416	0.128773	0.185749	0.194848	0.175253	0.1726	0.192456	0.187906		0.0409921	0.0380983	0.0410233	0.0375319	0.05095	0.0517057	0.071153	0.0747953	0.0358384
564	0	0.000667059	0.00323307	0.00652693	0.000135599	0.00183517	0.0240212	0.0185462	0.0254258	0.0252013	0.0193228	0.0181007	0.0236677	0.0236971		0.0100868	0.00990145	0.00284528	0.00182163	0.00229876	0.00212571	0.0050734	0.00463461	0.0522003	0.050041	0.0343274	0.0358588	0.0558288	0.0620912	0.0344106	0.0344787	0.114604	0.125663	0.182384	0.191425	0.171641	0.168994	0.188246	0.184019		0.0407499	0.0378436	0.0407515	0.0372798	0.0506589	0.0514099	0.0707418	0.0743576	0.0355021
565	0	0.000674802	0.00321311	0.00648878	0.000131193	0.00184867	0.0238173	0.0183989	0.0250598	0.0248431	0.0190529	0.0178401	0.0233399	0.0233805		0.0100614	0.00986383	0.00280313	0.00179667	0.00227275	0.00208276	0.00499915	0.00457545	0.0507679	0.0486786	0.0332602	0.0347604	0.0541573	0.0603711	0.0333329	0.0333976	0.111832	0.122593	0.179057	0.188037	0.168073	0.165431	0.184092	0.180176		0.0405231	0.0376043	0.0404923	0.0370412	0.0503829	0.0511294	0.0703512	0.0739391	0.0351793
566	0	0.000681851	0.00319488	0.00645382	0.000126767	0.00186294	0.0236265	0.0182631	0.024712	0.0245028	0.0187973	0.0175938	0.0230275	0.0230805		0.0100399	0.00983114	0.0027634	0.00177313	0.00224973	0.00204338	0.00493008	0.0045208	0.0493744	0.0473533	0.0322214	0.0336911	0.0525286	0.0586949	0.0322849	0.0323467	0.109137	0.119605	0.175805	0.184727	0.164581	0.161944	0.18003	0.176415		0.0403117	0.0373824	0.0402482	0.0368174	0.0501246	0.0508681	0.0699827	0.0735424	0.0348719
567	0	0.00068752	0.0031779	0.0064207	0.000122659	0.00187711	0.023442	0.0181315	0.0243781	0.0241769	0.0185534	0.0173597	0.0227269	0.0227934		0.0100183	0.00980011	0.00272525	0.00174981	0.00222865	0.00200745	0.00486674	0.00446989	0.0480352	0.0460777	0.0312214	0.0326617	0.0509659	0.0570872	0.0312763	0.0313364	0.106554	0.116737	0.172669	0.181536	0.161201	0.158569	0.176097	0.172774		0.0401156	0.0371796	0.040022	0.0366096	0.0498861	0.0506299	0.0696376	0.0731703	0.0345823
568	0	0.000691127	0.00316172	0.00638807	0.00011921	0.00189032	0.023257	0.0179965	0.0240538	0.0238622	0.0183186	0.0171357	0.0224344	0.0225154		0.00999252	0.00976746	0.00268786	0.00172547	0.0022085	0.00197486	0.00480966	0.00442195	0.0467653	0.0448642	0.0302708	0.031683	0.0494924	0.0555727	0.030317	0.0303773	0.104118	0.114027	0.169685	0.178505	0.157966	0.155341	0.172328	0.169287		0.0399347	0.036998	0.0398162	0.036419	0.04967	0.0504186	0.0693173	0.0728252	0.0343124
569	0	0.000691987	0.00314587	0.0063546	0.000116758	0.0019017	0.0230646	0.0178508	0.0237347	0.0235555	0.0180905	0.01692	0.0221461	0.022243		0.00995849	0.00972994	0.00265042	0.00169889	0.00218823	0.00194549	0.00475936	0.00437621	0.0455799	0.0437252	0.0293803	0.0307658	0.0481314	0.0541761	0.0294166	0.0294796	0.101863	0.111513	0.166889	0.175671	0.15491	0.152295	0.168759	0.165993		0.0397692	0.0368393	0.0396333	0.036247	0.0494786	0.0502381	0.0690232	0.0725098	0.0340647
570	0	0.000690882	0.00313256	0.00632763	0.000114024	0.00191226	0.0228946	0.0177238	0.0234449	0.0232786	0.017886	0.0167269	0.0218788	0.021996		0.00992963	0.00970033	0.00261947	0.0016773	0.00217878	0.00192658	0.004725	0.00434165	0.0444682	0.042653	0.0285418	0.0299054	0.0468574	0.0528649	0.028573	0.0286419	0.0997305	0.109122	0.164199	0.172953	0.151996	0.149393	0.165355	0.162853		0.0396343	0.0367192	0.0394799	0.0361073	0.0493233	0.050098	0.068773	0.0722381	0.0338521
571	0	0.000689119	0.00312384	0.00631376	0.000109743	0.00192348	0.0227748	0.0176436	0.0232056	0.0230502	0.0177198	0.0165687	0.0216483	0.0217924		0.00991954	0.00969099	0.00260036	0.00166697	0.00218878	0.00192316	0.00471234	0.00432523	0.0434069	0.0416285	0.027739	0.0290873	0.0456287	0.0515905	0.0277742	0.0278521	0.0976435	0.106762	0.161519	0.170251	0.14916	0.146568	0.162051	0.159801		0.0395411	0.0366466	0.0393581	0.0360081	0.0492098	0.0500008	0.0685774	0.0720171	0.0336818
572	0	0.000686804	0.00311897	0.00631049	0.000104274	0.00193518	0.0226957	0.017601	0.0230085	0.0228623	0.0175857	0.0164401	0.0214493	0.0216254		0.00992452	0.00969798	0.00259037	0.00166528	0.00221372	0.00193188	0.00471682	0.00432319	0.042391	0.0406477	0.0269692	0.0283076	0.0444434	0.0503535	0.027016	0.0271051	0.0956053	0.104441	0.15886	0.167575	0.146402	0.143819	0.158844	0.156833		0.0394827	0.0366133	0.0392635	0.0359425	0.0491314	0.0499399	0.0684275	0.0718392	0.0335462
573	0	0.000684042	0.00311724	0.0063153	9.79767e-05	0.00194715	0.0226476	0.017587	0.0228455	0.022707	0.0174775	0.0163356	0.0212766	0.0214881		0.00994089	0.00971738	0.00258683	0.0016696	0.00224908	0.00194937	0.00473385	0.00433174	0.0414162	0.0397061	0.02623	0.0275623	0.0433	0.0491548	0.0262939	0.0263957	0.0936194	0.102167	0.156237	0.164936	0.143719	0.141144	0.155729	0.153946		0.0394523	0.0366111	0.0391917	0.0359037	0.0490816	0.0499087	0.0683145	0.0716968	0.033438
574	0	0.000680939	0.00311789	0.00632569	9.12114e-05	0.00195919	0.0226211	0.0175925	0.0227082	0.0225761	0.017389	0.0162498	0.0211248	0.0213738		0.00996495	0.00974526	0.00258704	0.00167731	0.00229036	0.00197224	0.00475887	0.00434712	0.0404776	0.0387996	0.0255191	0.0268474	0.0421966	0.0479952	0.0256037	0.0257189	0.0916891	0.0999472	0.153661	0.162346	0.141108	0.138541	0.152702	0.151136		0.039443	0.0366319	0.0391384	0.0358848	0.0490539	0.0499008	0.0682295	0.0715823	0.0333498
575	0	0.000677602	0.00312021	0.00633916	8.43374e-05	0.00197113	0.0226066	0.0176082	0.0225883	0.0224617	0.0173142	0.0161773	0.0209886	0.0212757		0.009993	0.0097777	0.00258832	0.00168577	0.00233304	0.00199715	0.00478732	0.00436554	0.0395708	0.0379241	0.0248341	0.0261591	0.0411317	0.0468754	0.0249409	0.0250694	0.0898177	0.0977899	0.151145	0.159816	0.138567	0.136006	0.14976	0.1484		0.039448	0.0366675	0.0390992	0.0358788	0.0490419	0.0499097	0.0681637	0.0714879	0.0332743
576	0	0.000674136	0.00312346	0.00635319	7.77146e-05	0.00198276	0.0225944	0.0176253	0.0224776	0.0223558	0.0172467	0.0161128	0.020863	0.0211868		0.0100213	0.00981076	0.00258798	0.00169236	0.00237262	0.00202071	0.00481463	0.00438324	0.0386913	0.0370753	0.0241724	0.0254933	0.0401035	0.0457963	0.0243012	0.0244423	0.0880084	0.0957023	0.148702	0.157355	0.136095	0.133539	0.146897	0.145734		0.0394606	0.0367098	0.0390699	0.0358789	0.0490389	0.0499286	0.0681082	0.0714061	0.033204
577	0	0.000670646	0.00312691	0.00636529	7.17025e-05	0.0019939	0.0225752	0.0176345	0.0223678	0.0222504	0.0171804	0.0160509	0.0207424	0.0211005		0.0100463	0.00984051	0.00258333	0.00169446	0.00240459	0.00203957	0.00483621	0.00439643	0.0378347	0.0362493	0.0235316	0.0248462	0.0391103	0.0447587	0.0236801	0.0238322	0.0862647	0.0936915	0.146343	0.154973	0.133689	0.131136	0.14411	0.143134		0.0394737	0.0367505	0.0390459	0.0358781	0.0490384	0.0499512	0.0680541	0.0713292	0.0331316
578	0	0.00066724	0.00312982	0.00637294	6.6661e-05	0.00200434	0.0225392	0.0176268	0.0222506	0.0221375	0.0171091	0.015986	0.0206219	0.02101		0.0100641	0.00986303	0.00257168	0.00168943	0.00242443	0.00205034	0.00484752	0.00440135	0.0369964	0.035442	0.0229094	0.0242137	0.0381505	0.0437632	0.0230734	0.0232341	0.0845895	0.0917648	0.144079	0.152682	0.131347	0.128796	0.141395	0.140597		0.0394807	0.0367816	0.039023	0.0358696	0.0490339	0.0499709	0.0679926	0.0712496	0.0330497
579	0	0.000664021	0.00313147	0.00637365	6.29497e-05	0.0020139	0.022477	0.017593	0.0221178	0.0220092	0.0170267	0.015913	0.0204959	0.0209083		0.0100712	0.00987438	0.00255035	0.00167465	0.00242763	0.00204967	0.00484397	0.00439421	0.0361722	0.0346493	0.0223033	0.023592	0.0372224	0.0428107	0.0224766	0.0226429	0.0829862	0.0899293	0.141922	0.150489	0.129067	0.126517	0.138748	0.138119		0.0394746	0.0367949	0.0389969	0.0358466	0.0490189	0.0499811	0.0679147	0.0711596	0.0329509
580	0	0.000658401	0.00313318	0.00637657	5.84362e-05	0.00202023	0.0224116	0.0175585	0.0220057	0.0219011	0.0169623	0.015859	0.0203904	0.0208271		0.0100747	0.00988519	0.00252565	0.00165537	0.00242908	0.00205143	0.00484383	0.00439262	0.035388	0.0338958	0.0217413	0.0230124	0.0363627	0.0419332	0.0219212	0.0220927	0.0814869	0.0882007	0.139872	0.148398	0.126907	0.124351	0.136239	0.135755		0.0394948	0.0368334	0.0389995	0.0358417	0.0490334	0.0500239	0.0678698	0.0711058	0.0328704
581	0	0.000648527	0.00313668	0.00639072	5.1315e-05	0.00202212	0.0223694	0.0175508	0.0219482	0.0218465	0.0169424	0.0158486	0.0203285	0.020795		0.010084	0.00990711	0.00250499	0.0016382	0.00244401	0.00206886	0.0048646	0.0044127	0.0346661	0.0332023	0.0212448	0.0225003	0.035598	0.0411511	0.0214333	0.0216122	0.0801077	0.0865797	0.137912	0.146394	0.124906	0.122337	0.133919	0.133547		0.039575	0.0369352	0.0390572	0.035885	0.0491114	0.0501349	0.0679008	0.0711282	0.0328403
582	0	0.000635611	0.00314189	0.00641337	4.24357e-05	0.0020211	0.0223461	0.0175638	0.0219329	0.0218331	0.0169567	0.0158719	0.0203009	0.0208012		0.0100982	0.00993777	0.00248732	0.00162257	0.00246847	0.00209766	0.00490053	0.00444849	0.0339963	0.0325591	0.0208015	0.0220428	0.034911	0.0404475	0.021	0.0211879	0.0788282	0.0850506	0.136032	0.144468	0.123039	0.12045	0.131756	0.13147		0.0397007	0.0370845	0.0391569	0.035965	0.0492378	0.0502977	0.0679895	0.0712089	0.0328484
583	0	0.000620866	0.00314871	0.00644179	3.2648e-05	0.00201871	0.0223373	0.0175919	0.0219475	0.021849	0.0169951	0.015919	0.0202984	0.0208347		0.0101165	0.00997479	0.00247156	0.0016079	0.00249851	0.00213351	0.00494587	0.00449401	0.0333689	0.0319569	0.020399	0.021627	0.0342847	0.0398058	0.0206087	0.0208064	0.0776282	0.083598	0.13422	0.14261	0.121277	0.118665	0.129716	0.129498		0.0398572	0.0372656	0.0392857	0.0360703	0.0493973	0.0504962	0.0681177	0.0713304	0.0328828
584	0	0.000605504	0.00315706	0.00647324	2.28016e-05	0.00201648	0.0223387	0.017629	0.0219798	0.0218818	0.0170473	0.0159803	0.0203119	0.0208846		0.010138	0.0100158	0.00245665	0.00159362	0.00253017	0.00217209	0.00499487	0.00454332	0.0327738	0.0313862	0.020025	0.02124	0.0337018	0.0392093	0.0202467	0.0204544	0.076488	0.0822069	0.132466	0.140808	0.119592	0.116955	0.127769	0.127606		0.0400298	0.0374628	0.0394307	0.0361896	0.0495746	0.0507139	0.0682671	0.0714748	0.0329313
585	0	0.000590739	0.00316684	0.00650498	1.37462e-05	0.00201593	0.0223461	0.0176692	0.0220174	0.0219195	0.0171031	0.0160458	0.020332	0.0209399		0.010162	0.0100584	0.00244151	0.00157916	0.00255951	0.00220908	0.00504178	0.00459044	0.0322014	0.0308376	0.019667	0.0208689	0.0331453	0.0386412	0.0199013	0.0201185	0.0753879	0.0808623	0.130759	0.139055	0.117957	0.115297	0.12588	0.125769		0.0402038	0.0376603	0.0395787	0.0363115	0.0497546	0.0509347	0.0684196	0.0716245	0.032982
586	0	0.000577782	0.00317796	0.00653429	6.3314e-06	0.0020186	0.022355	0.0177067	0.0220481	0.02195	0.0171522	0.0161058	0.0203496	0.0209898		0.0101876	0.0101003	0.00242509	0.00156394	0.00258255	0.00224018	0.00508086	0.00462941	0.0316419	0.0303018	0.0193128	0.0205008	0.0325978	0.0380848	0.0195599	0.0197852	0.0743086	0.0795497	0.129089	0.137339	0.116344	0.113665	0.124018	0.123961		0.0403645	0.0378425	0.0397168	0.0364245	0.0499219	0.0511422	0.0685569	0.0717618	0.0330227
587	0	0.000567847	0.00319034	0.00655843	1.40698e-06	0.00202602	0.0223613	0.0177357	0.0220595	0.0219611	0.0171846	0.0161504	0.0203555	0.0210233		0.0102139	0.010139	0.00240632	0.00154739	0.00259536	0.00226106	0.00510636	0.00465427	0.0310855	0.0297695	0.0189501	0.0201229	0.0320424	0.0375234	0.0192097	0.0194412	0.0732307	0.0782545	0.127446	0.135651	0.114726	0.112034	0.12215	0.122159		0.0404972	0.0379936	0.039832	0.0365173	0.0500613	0.0513202	0.0686609	0.0718689	0.0330413
588	0	0.000562146	0.00320387	0.00657466	-1.77414e-07	0.00203973	0.0223606	0.0177501	0.0220394	0.0219407	0.0171898	0.0161699	0.0203404	0.0210296		0.0102402	0.0101721	0.00238412	0.00152893	0.00259397	0.0022674	0.00511254	0.00465904	0.0305227	0.0292316	0.0185664	0.0197221	0.0314618	0.0369403	0.018838	0.0190731	0.0721352	0.0769624	0.125819	0.133982	0.113075	0.110378	0.120243	0.120336		0.0405873	0.0380979	0.0399114	0.0365785	0.0501575	0.0514525	0.0687133	0.0719282	0.0330259
589	0	0.000558715	0.00321985	0.00658759	9.29796e-07	0.00206231	0.0223674	0.0177627	0.0220197	0.0219189	0.0171946	0.0161923	0.0203312	0.0210394		0.010268	0.0102072	0.00235925	0.00150689	0.00258331	0.00226694	0.00510694	0.00465354	0.0299875	0.0287181	0.0181992	0.019336	0.0309088	0.0363912	0.0184793	0.0187169	0.0710949	0.0757301	0.124257	0.132377	0.111483	0.108782	0.118403	0.118576		0.0406746	0.0381938	0.0399958	0.0366368	0.0502541	0.0515851	0.0687574	0.071988	0.0330022
590	0	0.00055485	0.00323923	0.00660322	3.3758e-06	0.002094	0.0223964	0.0177887	0.0220352	0.0219292	0.0172281	0.0162473	0.0203564	0.0210858		0.0102991	0.0102519	0.00233334	0.00148066	0.00257101	0.00226963	0.00510097	0.00465094	0.0295138	0.0282594	0.0178874	0.0190039	0.0304381	0.0359326	0.0181707	0.0184116	0.0701794	0.0746115	0.122802	0.130877	0.110044	0.10733	0.116738	0.116964		0.0408022	0.0383246	0.0401271	0.0367243	0.0503973	0.0517673	0.0688425	0.0721005	0.0330007
591	0	0.00055065	0.00326146	0.00662099	6.95372e-06	0.00213282	0.0224432	0.0178255	0.0220786	0.021965	0.017284	0.0163277	0.0204087	0.0211605		0.0103332	0.0103041	0.00230667	0.00145128	0.00255715	0.00227449	0.00509464	0.0046503	0.0290911	0.0278469	0.0176211	0.0187161	0.0300355	0.0355485	0.0179038	0.0181484	0.069366	0.0735882	0.121437	0.129465	0.108732	0.105997	0.115219	0.115475		0.0409603	0.0384819	0.0402941	0.0368341	0.0505759	0.0519872	0.0689595	0.0722538	0.0330167
592	0	0.000546216	0.00328597	0.00664031	1.14567e-05	0.00217676	0.0225037	0.0178708	0.0221423	0.0220194	0.017356	0.0164263	0.0204809	0.0212557		0.01037	0.0103616	0.00227954	0.00141979	0.00254184	0.00228058	0.00508795	0.00465071	0.0287093	0.0274719	0.0173902	0.0184629	0.0296865	0.0352229	0.0176702	0.0179185	0.0686322	0.0726421	0.120146	0.128124	0.107519	0.104761	0.113816	0.114087		0.041139	0.0386575	0.0404854	0.0369597	0.0507787	0.0522331	0.0690993	0.0724359	0.0330454
593	0	0.000541649	0.00331218	0.0066606	1.66778e-05	0.00222382	0.0225734	0.0179221	0.0222186	0.0220859	0.0174379	0.0165358	0.0205659	0.0213632		0.0104092	0.0104225	0.00225223	0.00138722	0.00252517	0.00228691	0.00508094	0.00465124	0.0283582	0.0271259	0.0171845	0.0182348	0.0293768	0.0349399	0.0174614	0.0177131	0.0679555	0.0717551	0.118912	0.12684	0.106381	0.103598	0.112499	0.112776		0.0413285	0.038843	0.0406897	0.0370943	0.0509946	0.052493	0.0692529	0.0726347	0.033082
594	0	0.000537047	0.00333953	0.00668129	2.24102e-05	0.00227202	0.0226483	0.0179771	0.0223002	0.0221575	0.0175233	0.016649	0.0206563	0.021475		0.0104504	0.0104846	0.00222504	0.0013546	0.00250724	0.00229254	0.0050736	0.00465096	0.0280278	0.0268003	0.0169941	0.018022	0.0290922	0.0346836	0.0172691	0.0175235	0.0673139	0.0709096	0.117717	0.125596	0.10529	0.102483	0.11124	0.111518		0.0415189	0.03903	0.0408957	0.0372313	0.0512125	0.0527553	0.0694112	0.0728382	0.0331217
595	0	0.000532513	0.00336744	0.00670179	2.84471e-05	0.00231934	0.0227239	0.0180331	0.0223794	0.0222276	0.017606	0.0167588	0.020745	0.0215832		0.0104935	0.0105459	0.00219824	0.00132297	0.00248816	0.00229649	0.00506596	0.00464895	0.0277078	0.0264867	0.016809	0.0178149	0.0288182	0.0344379	0.0170848	0.0173406	0.0666852	0.0700879	0.116546	0.124376	0.10422	0.101392	0.110009	0.110289		0.0417005	0.0392102	0.041092	0.0373641	0.0514211	0.053008	0.0695651	0.0730346	0.0331596
596	0	0.000528145	0.00339536	0.00672152	3.45815e-05	0.0023638	0.0227961	0.0180879	0.0224487	0.0222894	0.0176796	0.0168577	0.0208249	0.0216797		0.010538	0.0106043	0.00217213	0.00129336	0.00246801	0.0022978	0.00505803	0.00464428	0.0273883	0.0261766	0.0166189	0.0176038	0.0285405	0.0341869	0.0169001	0.0171558	0.0660476	0.0692725	0.115382	0.123166	0.103145	0.100303	0.108776	0.109067		0.0418633	0.0393752	0.0412673	0.0374859	0.0516092	0.0532393	0.0697055	0.0732118	0.033191
597	0	0.000524044	0.00342271	0.00673991	4.06065e-05	0.00240339	0.0228606	0.018139	0.0225006	0.0223362	0.017738	0.0169386	0.0208886	0.0217564		0.0105837	0.0106576	0.00214699	0.00126682	0.0024469	0.0022955	0.00504983	0.00463604	0.0270592	0.0258615	0.016414	0.017379	0.0282449	0.0339147	0.0167065	0.0169603	0.0653793	0.068446	0.11421	0.12195	0.102039	0.0991916	0.107512	0.107826		0.0419975	0.0395166	0.0414103	0.03759	0.0517658	0.0534374	0.0698232	0.0733578	0.033211
598	0	0.000520311	0.00344893	0.00675637	4.63154e-05	0.00243613	0.022913	0.018184	0.0225276	0.0223612	0.0177747	0.0169944	0.0209289	0.0218053		0.0106302	0.0107038	0.00212311	0.00124436	0.00242492	0.00228863	0.00504136	0.00462329	0.0267105	0.025533	0.0161841	0.0171308	0.027917	0.0336053	0.0164958	0.0167451	0.0646586	0.0675914	0.113013	0.120713	0.100875	0.0980333	0.106187	0.106544		0.0420933	0.0396262	0.0415095	0.0376699	0.0518796	0.0535905	0.0699094	0.0734607	0.0332149
599	0	0.00051887	0.00347688	0.00676927	5.42516e-05	0.00247312	0.0229809	0.0182377	0.0225539	0.0223864	0.0178112	0.0170544	0.0209769	0.021858		0.0106858	0.0107534	0.00210422	0.00122644	0.00239915	0.00227853	0.00503096	0.00460749	0.0263849	0.0252299	0.0159598	0.0168873	0.0276047	0.033314	0.0162977	0.0165417	0.063958	0.0667744	0.111837	0.119513	0.0997375	0.0969196	0.104901	0.105315		0.0421704	0.0397215	0.0415909	0.0377466	0.0519725	0.0537275	0.0699833	0.0735464	0.0332161
600	0	0.000520907	0.00350912	0.00677821	6.63067e-05	0.00252388	0.023087	0.0183129	0.0226044	0.0224339	0.0178688	0.0171466	0.0210612	0.0219446		0.0107561	0.0108155	0.00209242	0.00121212	0.00236747	0.00226716	0.00501742	0.0045906	0.0261218	0.0249874	0.015773	0.016678	0.0273564	0.0330957	0.0161418	0.0163809	0.0633503	0.0660584	0.110731	0.118407	0.0987128	0.0959384	0.103752	0.104229		0.0422532	0.0398238	0.0416846	0.0378421	0.052072	0.0538816	0.0700685	0.073646	0.033229
601	0	0.000525414	0.00354461	0.00678444	8.12954e-05	0.00258393	0.0232201	0.0184032	0.0226723	0.0224976	0.0179414	0.0172614	0.0211713	0.022055		0.0108369	0.0108864	0.00208558	0.00120037	0.00233116	0.00225442	0.00500149	0.00457249	0.0259065	0.0247915	0.0156158	0.0164961	0.0271583	0.0329343	0.0160189	0.0162533	0.0628148	0.065422	0.109682	0.117376	0.0977777	0.0950611	0.102712	0.103257		0.0423391	0.0399304	0.0417862	0.0379503	0.0521753	0.0540468	0.0701615	0.0737549	0.0332504
602	0	0.000531382	0.00358229	0.00678923	9.80327e-05	0.00264884	0.023369	0.0185026	0.0227508	0.0225712	0.0180227	0.0173888	0.0212969	0.0221792		0.010924	0.0109621	0.00208155	0.00119018	0.00229152	0.00224024	0.00498388	0.00455303	0.0257242	0.0246282	0.0154801	0.0163346	0.0269965	0.0328136	0.0159202	0.0161495	0.0623305	0.0648441	0.10868	0.116399	0.0969091	0.0942588	0.101754	0.102365		0.0424254	0.0400385	0.0418913	0.0380656	0.0522799	0.0542175	0.0702591	0.0738685	0.0332768
603	0	0.000537803	0.00362112	0.00679384	0.000115333	0.00271415	0.0235224	0.0186048	0.022833	0.0226486	0.0181067	0.0175193	0.0214276	0.022307		0.0110134	0.0110387	0.00207819	0.00118051	0.00224984	0.00222454	0.00496534	0.00453208	0.0255603	0.0244838	0.0153581	0.0161865	0.0268572	0.0327172	0.0158365	0.0160601	0.061877	0.0643037	0.107714	0.115458	0.0960837	0.0935029	0.100848	0.101525		0.0425092	0.0401453	0.0419956	0.038182	0.0523831	0.0543878	0.0703578	0.0739825	0.0333051
604	0	0.00054367	0.00366005	0.00679952	0.000132012	0.0027754	0.0236692	0.0187036	0.0229121	0.0227235	0.018187	0.017643	0.021553	0.0224285		0.0111008	0.0111123	0.00207338	0.00117034	0.0022074	0.00220723	0.00494659	0.0045095	0.0254003	0.0243443	0.0152419	0.0160449	0.0267265	0.032629	0.0157588	0.0159756	0.0614337	0.0637799	0.106771	0.114535	0.0952784	0.0927646	0.0999665	0.100704		0.042588	0.0402483	0.0420944	0.0382937	0.0524821	0.0545519	0.0704545	0.0740922	0.0333319
605	0	0.000547974	0.00369803	0.00680754	0.000146884	0.00282815	0.0237979	0.018793	0.0229812	0.0227897	0.0182576	0.0177502	0.0216626	0.0225336		0.011182	0.011179	0.00206497	0.00115866	0.0021655	0.00218825	0.00492836	0.00448517	0.0252293	0.0241959	0.0151234	0.0159027	0.0265907	0.0325326	0.015678	0.0158866	0.0609801	0.0632521	0.105842	0.11361	0.0944699	0.0920153	0.0990814	0.0998725		0.042659	0.0403445	0.0421836	0.038395	0.0525744	0.054704	0.0705456	0.0741932	0.0333538
606	0	0.000549707	0.00373402	0.00681916	0.000158764	0.00286794	0.0238974	0.0188666	0.0230335	0.0228411	0.0183123	0.0178313	0.021746	0.0226122		0.0112528	0.011235	0.00205083	0.00114443	0.00212543	0.0021675	0.00491138	0.00445894	0.025033	0.0240248	0.0149948	0.015753	0.0264358	0.0324119	0.0155852	0.0157838	0.0604959	0.0626994	0.104916	0.112666	0.093635	0.0912263	0.0981642	0.0989988		0.0427195	0.0404313	0.0422585	0.0384799	0.0526574	0.0548383	0.0706279	0.0742809	0.0333676
607	0	0.000547861	0.00376696	0.00683562	0.000166467	0.00289032	0.0239564	0.0189184	0.0230622	0.0228713	0.0183449	0.0178764	0.0217929	0.0226542		0.0113092	0.0112764	0.00202881	0.00112664	0.00208847	0.00214491	0.00489639	0.00443069	0.0247966	0.0238172	0.014848	0.0155888	0.0262481	0.0322507	0.0154712	0.0156575	0.0599608	0.0621015	0.103981	0.111684	0.0927505	0.0903688	0.0971868	0.0980522		0.0427668	0.0405059	0.0423149	0.0385427	0.0527282	0.054949	0.0706981	0.0743508	0.03337
608	-1.76313e-09	0.000543658	0.00380036	0.00685768	0.000171204	0.00289806	0.0239929	0.0189603	0.0230785	0.0228916	0.0183644	0.0178971	0.0218198	0.0226728		0.0113603	0.0113088	0.00199884	0.00110548	0.00204967	0.00211721	0.00488089	0.00439733	0.0245463	0.0236007	0.0146992	0.0154254	0.0260558	0.032081	0.0153575	0.0155267	0.0594122	0.0615024	0.103068	0.110702	0.0918632	0.0894959	0.0962074	0.0970909		0.0428032	0.0405731	0.0423608	0.0385925	0.0527957	0.055046	0.0707639	0.0744127	0.033369
609	-6.75276e-09	0.000539045	0.00383801	0.00688477	0.000175058	0.00289757	0.0240321	0.0190077	0.0230978	0.0229165	0.0183836	0.0179116	0.0218495	0.0226878		0.0114175	0.0113405	0.00196281	0.0010821	0.00200383	0.00208181	0.00486215	0.0043565	0.0243162	0.0234099	0.0145686	0.0152814	0.0258944	0.0319436	0.0152694	0.015415	0.0588985	0.0609561	0.102211	0.109766	0.0910322	0.0886765	0.0952989	0.0961898		0.0428333	0.0406391	0.042407	0.038642	0.0528694	0.0551426	0.0708344	0.0744786	0.033374
610	-1.45193e-08	0.000534098	0.00387927	0.00691623	0.000178153	0.0028898	0.0240732	0.0190598	0.0231193	0.0229449	0.0184023	0.0179202	0.0218814	0.0226993		0.0114798	0.0113714	0.00192156	0.00105685	0.00195195	0.0020397	0.00484052	0.00430912	0.0241046	0.0232422	0.0144543	0.015155	0.0257609	0.0318352	0.0152042	0.0153204	0.0584164	0.0604573	0.101404	0.108871	0.0902524	0.0879059	0.0944545	0.0953434		0.0428575	0.0407033	0.0424529	0.0386906	0.0529477	0.0552379	0.0709086	0.0745474	0.0333838
611	-2.4613e-08	0.000528893	0.00392349	0.00695138	0.000180613	0.00287572	0.0241154	0.0191153	0.0231422	0.022976	0.0184201	0.0179232	0.0219145	0.0227073		0.011546	0.0114014	0.00187589	0.00103009	0.001895	0.00199184	0.00481639	0.00425609	0.0239093	0.0230949	0.0143548	0.0150443	0.0256522	0.0317525	0.015159	0.0152411	0.0579625	0.0600005	0.100643	0.108013	0.0895188	0.0871792	0.0936677	0.0945463		0.042876	0.0407652	0.0424975	0.038738	0.053029	0.0553312	0.0709851	0.0746183	0.033397
612	-3.65843e-08	0.000523506	0.00397003	0.00698955	0.000182562	0.00285629	0.0241579	0.0191731	0.0231659	0.0230089	0.0184367	0.017921	0.021948	0.0227116		0.0116153	0.0114304	0.00182663	0.00100219	0.00183398	0.00193921	0.00479011	0.00419833	0.0237284	0.0229652	0.0142683	0.0149474	0.0255653	0.0316922	0.0151309	0.0151752	0.0575335	0.0595806	0.0999227	0.10719	0.0888263	0.0864916	0.0929317	0.0937929		0.0428893	0.0408244	0.0425404	0.0387836	0.0531117	0.0554217	0.0710628	0.0746901	0.0334124
613	-4.99836e-08	0.000518013	0.00401825	0.00703007	0.000184123	0.00283248	0.0241998	0.0192322	0.0231896	0.0230425	0.0184517	0.0179137	0.021981	0.0227125		0.0116865	0.0114582	0.0017746	0.000973509	0.00176985	0.00188279	0.00476205	0.00413676	0.0235599	0.0228505	0.014193	0.0148624	0.025497	0.0316511	0.0151171	0.0151208	0.0571258	0.059192	0.0992377	0.106396	0.0881699	0.0858385	0.0922399	0.0930779		0.0428978	0.0408803	0.0425808	0.0388268	0.0531942	0.0555086	0.0711406	0.074762	0.0334287
614	-6.43612e-08	0.000512492	0.00406751	0.00707228	0.00018542	0.00280524	0.0242405	0.0192915	0.0232125	0.0230759	0.0184648	0.0179019	0.0220126	0.0227098		0.0117587	0.0114847	0.00172063	0.000944406	0.0017036	0.00182355	0.00473259	0.00407229	0.0234019	0.022748	0.0141272	0.0147874	0.0254444	0.0316258	0.0151146	0.0150759	0.0567363	0.0588297	0.0985832	0.105627	0.0875446	0.0852149	0.0915856	0.0923956		0.0429018	0.0409325	0.0426179	0.0388672	0.053275	0.0555911	0.0712171	0.0748329	0.0334445
615	-7.92675e-08	0.000507017	0.00411717	0.00711548	0.000186577	0.00277555	0.0242791	0.01935	0.0232339	0.0231082	0.0184756	0.0178856	0.0220421	0.0227036		0.0118307	0.0115098	0.00166554	0.000915244	0.00163621	0.00176246	0.00470208	0.00400582	0.0232524	0.0226551	0.0140692	0.0147205	0.0254044	0.031613	0.0151207	0.0150387	0.0563617	0.0584882	0.0979544	0.104881	0.0869452	0.0846161	0.0909622	0.0917407		0.0429018	0.0409805	0.0426512	0.0389042	0.0533525	0.0556685	0.0712912	0.0749017	0.0334585
616	-9.42528e-08	0.000501666	0.00416658	0.00715903	0.000187717	0.00274436	0.0243149	0.0194064	0.0232531	0.0231384	0.0184837	0.0178653	0.0220686	0.0226938		0.0119016	0.0115334	0.00161014	0.000886385	0.00156866	0.0017005	0.00467091	0.00393829	0.0231095	0.0225691	0.0140172	0.0146598	0.0253738	0.0316095	0.0151325	0.0150073	0.0559985	0.0581625	0.0973461	0.104152	0.0863669	0.0840374	0.090363	0.0911076		0.042898	0.0410238	0.0426798	0.0389373	0.0534251	0.0557399	0.0713618	0.0749675	0.0334695
617	-1.08868e-07	0.000496515	0.0042151	0.00720223	0.000188964	0.00271264	0.024347	0.0194598	0.0232693	0.0231656	0.018489	0.0178413	0.0220912	0.0226806		0.0119702	0.0115554	0.00155527	0.000858191	0.00150194	0.00163864	0.00463943	0.0038706	0.0229712	0.0224872	0.0139696	0.0146035	0.0253497	0.0316118	0.0151471	0.0149797	0.0556435	0.0578472	0.0967537	0.103437	0.0858045	0.0834738	0.0897813	0.0904908		0.0428909	0.0410618	0.0427031	0.0389661	0.0534912	0.0558045	0.0714276	0.0750294	0.0334761
618	-1.22662e-07	0.000491639	0.00426209	0.00724444	0.000190442	0.00268136	0.0243746	0.0195091	0.0232817	0.0231888	0.0184909	0.0178138	0.022109	0.0226638		0.0120357	0.0115756	0.00150174	0.000831024	0.00143702	0.00157786	0.00460801	0.00380366	0.0228355	0.0224068	0.0139246	0.0145497	0.0253291	0.0316169	0.0151617	0.014954	0.0552935	0.0575373	0.0961722	0.102732	0.0852531	0.0829207	0.0892105	0.0898849		0.0428809	0.0410941	0.0427204	0.03899	0.0535492	0.0558616	0.0714875	0.0750862	0.0334771
619	-1.35187e-07	0.000487116	0.00430692	0.00728496	0.000192274	0.00265147	0.024397	0.0195531	0.0232897	0.0232071	0.0184892	0.0177832	0.0221212	0.0226434		0.0120968	0.0115939	0.00145037	0.000805246	0.0013749	0.00151913	0.00457702	0.00373839	0.0227005	0.0223251	0.0138805	0.0144964	0.0253087	0.0316213	0.0151734	0.0149284	0.0549452	0.0572274	0.0955969	0.102034	0.0847075	0.0823733	0.088644	0.0892844		0.0428683	0.0411201	0.042731	0.0390085	0.0535975	0.0559104	0.0715402	0.075137	0.0334711
620	-1.45992e-07	0.000483021	0.00434893	0.00732313	0.000194584	0.00262395	0.0244134	0.0195909	0.0232924	0.0232195	0.0184836	0.0177497	0.022127	0.0226196		0.0121527	0.0116103	0.001402	0.000781219	0.00131654	0.00146343	0.00454683	0.00367571	0.0225643	0.0222396	0.0138355	0.0144419	0.0252857	0.0316217	0.0151793	0.014901	0.0545952	0.0569125	0.0950229	0.101338	0.0841628	0.0818267	0.088075	0.0886837		0.0428535	0.0411395	0.0427341	0.039021	0.0536347	0.0559501	0.0715845	0.0751808	0.0334569
621	-1.54628e-07	0.000479431	0.00438749	0.00735828	0.000197495	0.00259975	0.0244229	0.0196212	0.0232892	0.023225	0.0184736	0.0177137	0.0221256	0.0225923		0.0122022	0.0116245	0.00135743	0.000759304	0.00126292	0.00141173	0.00451781	0.00361652	0.0224249	0.0221475	0.013788	0.0143841	0.0252568	0.0316149	0.0151767	0.0148697	0.0542405	0.0565873	0.0944454	0.100641	0.0836139	0.0812762	0.0874968	0.0880775		0.042837	0.0411516	0.0427292	0.0390271	0.053659	0.0559799	0.0716193	0.0752166	0.0334331
622	-1.60645e-07	0.000476422	0.00442195	0.00738973	0.000201132	0.00257984	0.0244248	0.019643	0.0232792	0.0232228	0.0184589	0.0176755	0.0221159	0.0225614		0.0122442	0.0116366	0.00131749	0.000739864	0.00121505	0.001365	0.00449032	0.00356175	0.0222804	0.0220461	0.0137362	0.0143212	0.0252192	0.0315976	0.0151625	0.0148328	0.0538776	0.0562468	0.0938597	0.099939	0.0830558	0.080717	0.0869029	0.0874602		0.042819	0.041156	0.0427154	0.0390263	0.0536689	0.055999	0.0716434	0.0752433	0.0333985
623	-1.63594e-07	0.000474071	0.00445168	0.00741683	0.000205618	0.00256519	0.0244183	0.0196553	0.0232618	0.0232119	0.0184392	0.0176354	0.0220973	0.0225271		0.0122779	0.0116462	0.00128301	0.000723259	0.00117388	0.00132423	0.00446473	0.0035123	0.0221288	0.0219327	0.0136783	0.0142513	0.0251696	0.0315664	0.015134	0.0147883	0.0535034	0.0558858	0.0932612	0.0992283	0.0824835	0.0801442	0.0862866	0.0868263		0.0427999	0.0411522	0.0426921	0.039018	0.0536629	0.0560066	0.0716555	0.0752601	0.0333518
624	-1.63025e-07	0.000472453	0.00447603	0.00743888	0.000211077	0.00255675	0.0244027	0.0196569	0.0232362	0.0231912	0.0184142	0.0175937	0.0220688	0.0224892		0.012302	0.0116534	0.0012548	0.000709853	0.00114041	0.00129038	0.00444141	0.00346909	0.0219683	0.0218048	0.0136127	0.0141726	0.0251051	0.0315181	0.0150883	0.0147343	0.0531148	0.0554992	0.0926451	0.0985053	0.0818918	0.0795532	0.0856412	0.0861703		0.0427802	0.0411397	0.0426586	0.0390018	0.0536393	0.0560019	0.0716546	0.0752658	0.0332916
625	-1.58488e-07	0.000471645	0.00449435	0.00745523	0.000217633	0.00255549	0.024377	0.0196468	0.0232017	0.02316	0.0183835	0.0175506	0.0220296	0.0224479		0.0123157	0.011658	0.00123369	0.000700006	0.00111561	0.00126442	0.00442072	0.00343303	0.0217968	0.0216595	0.0135376	0.0140831	0.0250226	0.0314493	0.0150226	0.0146689	0.0527084	0.055082	0.0920067	0.0977662	0.0812759	0.0789391	0.08496	0.0854868		0.0427602	0.041118	0.0426141	0.0389771	0.0535965	0.0559843	0.0716393	0.0752595	0.0332166
626	-8.39404e-07	0.000470776	0.00450823	0.00746796	0.000225052	0.00256031	0.0243577	0.0196345	0.0231515	0.0231158	0.0183418	0.0174971	0.021971	0.0223946		0.0123273	0.0116692	0.00122455	0.000697884	0.00110385	0.00124826	0.00440539	0.00340715	0.0216279	0.0215142	0.0134613	0.0139883	0.0249368	0.0313712	0.0149405	0.0146009	0.0523009	0.0546517	0.0913708	0.0970375	0.0806566	0.0783286	0.0842611	0.0848017		0.0427302	0.0410779	0.0425526	0.0389425	0.0535299	0.0559514	0.0716013	0.0752379	0.0331284
627	-2.67753e-06	0.000469043	0.00451976	0.00747956	0.000232965	0.00256893	0.0243572	0.0196283	0.0230822	0.0230585	0.0182858	0.0174262	0.0218881	0.0223236		0.0123441	0.0116934	0.00122947	0.000705766	0.00110658	0.00124169	0.00439685	0.00339211	0.0214739	0.0213845	0.0133918	0.0138949	0.0248624	0.0312965	0.0148493	0.0145395	0.051909	0.0542285	0.0907618	0.0963426	0.0800563	0.0777474	0.0835674	0.0841414		0.0426827	0.0410142	0.0424705	0.0388979	0.0534387	0.055903	0.0715369	0.0752002	0.0330301
628	-5.34594e-06	0.000466629	0.00452912	0.00748993	0.00024129	0.00258051	0.0243682	0.0196251	0.0229979	0.0229906	0.0182186	0.0173417	0.0217861	0.0222385		0.0123637	0.0117261	0.00124507	0.000721182	0.00112044	0.00124253	0.00439351	0.0033853	0.0213308	0.0212661	0.0133278	0.0138029	0.0247967	0.0312243	0.014751	0.0144829	0.0515288	0.0538114	0.0901741	0.0956739	0.0794717	0.0771895	0.0828796	0.0835013		0.0426216	0.040932	0.0423716	0.0388447	0.0533271	0.0558412	0.0714521	0.075149	0.0329233
629	-8.5177e-06	0.000463714	0.00453648	0.00749898	0.000249943	0.00259422	0.0243839	0.0196217	0.0229027	0.0229145	0.0181431	0.0172474	0.02167	0.022143		0.0123832	0.0117631	0.00126795	0.000741666	0.00114207	0.00124863	0.00439379	0.00338413	0.0211946	0.0211543	0.0132675	0.0137122	0.0247369	0.0311538	0.0146479	0.0144297	0.0511568	0.0533994	0.0896023	0.0950238	0.0788995	0.0766489	0.0821984	0.0828769		0.0425507	0.0408365	0.0422594	0.0387841	0.0531996	0.0557681	0.0713529	0.075087	0.0328095
630	-1.18659e-05	0.000460479	0.00454201	0.00750661	0.000258843	0.00260925	0.0243972	0.019615	0.0228007	0.0228327	0.0180621	0.0171472	0.0215449	0.0220409		0.0123999	0.0117998	0.00129474	0.000764747	0.0011681	0.0012578	0.00439613	0.00338599	0.0210616	0.0210446	0.0132093	0.0136229	0.02468	0.0310842	0.0145422	0.014378	0.0507894	0.0529915	0.0890409	0.0943847	0.0783366	0.0761193	0.0815244	0.0822636		0.0424739	0.0407328	0.0421374	0.0387175	0.0530603	0.0556856	0.0712452	0.0750168	0.0326901
631	-1.50635e-05	0.000457105	0.00454589	0.00751274	0.000267906	0.00262476	0.024401	0.0196019	0.0226961	0.0227477	0.0179787	0.0170448	0.0214158	0.0219359		0.0124114	0.0118321	0.00132205	0.00078796	0.00119516	0.0012679	0.00439895	0.00338828	0.0209279	0.0209325	0.0131517	0.0135349	0.0246234	0.0310145	0.0144361	0.0143263	0.0504231	0.0525867	0.0884845	0.0937491	0.0777796	0.0755949	0.0808583	0.0816567		0.0423951	0.0406263	0.0420094	0.0386463	0.0529137	0.0555958	0.0711351	0.0749411	0.0325667
632	-1.77837e-05	0.000453772	0.0045483	0.00751726	0.000277049	0.00263992	0.0243883	0.0195793	0.0225928	0.0226617	0.0178957	0.016944	0.0212879	0.0218316		0.0124148	0.0118555	0.00134651	0.000808835	0.00121988	0.00127673	0.00440067	0.0033884	0.0207894	0.0208134	0.0130929	0.0134483	0.0245641	0.030944	0.0143317	0.0142731	0.0500541	0.052184	0.0879279	0.0931096	0.0772254	0.0750695	0.0802008	0.0810516		0.0423179	0.0405221	0.0418788	0.0385717	0.0527641	0.0555009	0.0710284	0.0748626	0.0324407
633	-1.96994e-05	0.000450663	0.00454939	0.00752008	0.000286191	0.00265391	0.024352	0.019544	0.0224952	0.0225774	0.0178161	0.0168487	0.0211662	0.0217319		0.0124074	0.0118656	0.00136472	0.000824903	0.00123891	0.00128215	0.00439971	0.00338373	0.0206424	0.0206827	0.0130315	0.0133631	0.0244994	0.0308719	0.0142312	0.0142166	0.049679	0.0517824	0.0873656	0.0924586	0.0766708	0.0745371	0.0795526	0.0804438		0.0422464	0.0404254	0.0417492	0.0384952	0.0526157	0.0554028	0.0709312	0.0747839	0.0323136
634	-2.04838e-05	0.000447958	0.00454936	0.00752112	0.000295249	0.0026659	0.0242852	0.0194929	0.0224071	0.022497	0.0177428	0.0167627	0.0210557	0.0216404		0.0123867	0.0118581	0.0013733	0.000833698	0.00124887	0.00128198	0.00439451	0.00337169	0.020483	0.020536	0.0129658	0.0132792	0.0244264	0.0307972	0.0141368	0.0141552	0.0492942	0.0513809	0.0867924	0.0917887	0.0761124	0.0739915	0.0789144	0.0798287		0.0421844	0.0403414	0.0416244	0.038418	0.0524729	0.0553036	0.0708494	0.0747076	0.0321869
635	-1.981e-05	0.000445838	0.00454836	0.00752027	0.000304139	0.00267506	0.0241808	0.019423	0.0223329	0.0224231	0.0176788	0.0166897	0.0209616	0.0215608		0.01235	0.0118286	0.00136888	0.000832751	0.00124641	0.00127405	0.00438347	0.00334967	0.0203072	0.0203686	0.0128942	0.0131966	0.0243423	0.0307192	0.0140508	0.0140873	0.0488962	0.0509785	0.0862029	0.0910928	0.0755471	0.0734268	0.0782867	0.0792016		0.0421357	0.0402753	0.0415077	0.0383416	0.05234	0.0552053	0.0707891	0.0746364	0.0320621
636	-1.83281e-05	0.000444328	0.00454299	0.00751515	0.00031217	0.00267997	0.0240333	0.0193242	0.0222585	0.0223434	0.0176154	0.0166178	0.0208672	0.0214849		0.0122906	0.0117791	0.00135803	0.000826109	0.00124004	0.00126316	0.0043703	0.0033241	0.0201105	0.0201737	0.0128197	0.0131157	0.0242484	0.0306363	0.0139595	0.0140126	0.0484864	0.0505711	0.0856093	0.0903775	0.0749754	0.0728471	0.0776609	0.0785585		0.0420965	0.0402155	0.0413787	0.0382561	0.0521887	0.0550945	0.0707413	0.0745635	0.0319283
637	-1.68586e-05	0.000443262	0.00453076	0.00750437	0.00031896	0.00268054	0.0238475	0.0191937	0.0221701	0.0222468	0.0175436	0.0165344	0.0207555	0.0214028		0.0122074	0.0117162	0.00134908	0.000819337	0.00123933	0.00125498	0.00435923	0.00330232	0.0198941	0.0199519	0.0127462	0.0130364	0.0241489	0.0305485	0.0138514	0.0139328	0.0480703	0.0501572	0.085026	0.0896564	0.0744015	0.0722622	0.07703	0.0779021		0.0420598	0.0401482	0.0412197	0.0381537	0.0519956	0.05496	0.0706931	0.0744813	0.0317763
638	-1.53298e-05	0.000442533	0.00451321	0.00748932	0.000324891	0.00267793	0.0236319	0.0190392	0.0220714	0.0221376	0.0174655	0.0164428	0.0206311	0.021316		0.0121058	0.0116425	0.00134123	0.000812243	0.00124249	0.00124867	0.0043495	0.00328304	0.0196634	0.0197103	0.0126736	0.0129587	0.0240452	0.0304572	0.0137317	0.0138493	0.0476497	0.0497391	0.0844513	0.0889319	0.0738279	0.0716745	0.076398	0.0772374		0.0420247	0.0400753	0.0410389	0.0380382	0.0517719	0.0548071	0.070644	0.0743911	0.0316103
639	-1.36701e-05	0.000442039	0.00449191	0.00747141	0.000330346	0.00267331	0.0233949	0.0188681	0.0219664	0.0220201	0.0173832	0.0163459	0.0204986	0.0212256		0.0119912	0.0115605	0.00133369	0.000804632	0.00124774	0.0012434	0.00434035	0.00326499	0.0194236	0.0194558	0.0126015	0.0128823	0.0239386	0.0303636	0.0136056	0.0137634	0.0472266	0.0493194	0.0838833	0.0882065	0.073257	0.0710863	0.0757688	0.0765698		0.0419901	0.0399984	0.0408445	0.0379135	0.051529	0.0546413	0.0705933	0.0742946	0.0314345
640	-1.18078e-05	0.000441671	0.00446839	0.00745201	0.000335706	0.00266786	0.0231448	0.0186879	0.0218588	0.0218987	0.0172988	0.016247	0.0203625	0.0211331		0.0118692	0.0114726	0.00132567	0.000796313	0.00125328	0.00123831	0.00433104	0.00324689	0.0191799	0.0191953	0.0125298	0.012807	0.0238305	0.0302692	0.0134781	0.0136765	0.0468032	0.0489005	0.0833204	0.0874825	0.072691	0.0705	0.0751463	0.0759045		0.041955	0.0399193	0.0406446	0.0377834	0.0512784	0.0544679	0.0705406	0.0741931	0.0312531
641	-9.67131e-06	0.000441327	0.0044442	0.00743254	0.000341354	0.00266274	0.0228901	0.0185061	0.0217527	0.0217776	0.0172143	0.0161492	0.0202274	0.0210396		0.0117452	0.0113813	0.0013164	0.000787092	0.00125733	0.00123258	0.0043208	0.00322745	0.0189375	0.018936	0.0124582	0.0127328	0.0237224	0.0301752	0.0133545	0.01359	0.0463814	0.048485	0.0827607	0.0867624	0.0721325	0.069918	0.0745342	0.0752467		0.0419183	0.0398398	0.0404474	0.0376519	0.0510314	0.0542923	0.0704853	0.0740882	0.0310701
642	-7.18887e-06	0.0004409	0.00442091	0.00741438	0.000347672	0.00265912	0.0226391	0.0183302	0.0216517	0.0216613	0.0171318	0.0160556	0.0200979	0.0209466		0.0116245	0.0112892	0.00130507	0.000776777	0.00125809	0.00122535	0.00430888	0.00320541	0.0187016	0.0186846	0.0123866	0.0126593	0.0236156	0.030083	0.0132399	0.0135053	0.0459632	0.0480752	0.0822026	0.0860485	0.0715837	0.0693426	0.0739366	0.0746017		0.0418791	0.0397618	0.0402611	0.0375228	0.0507995	0.0541201	0.0704269	0.0739813	0.0308897
643	-4.28888e-06	0.000440285	0.00440006	0.00739892	0.000355042	0.00265818	0.0224001	0.0181677	0.0215599	0.021554	0.0170535	0.0159692	0.0199785	0.0208554		0.0115127	0.0111987	0.00129091	0.000765174	0.00125378	0.00121579	0.00429453	0.00317947	0.0184775	0.0184482	0.0123147	0.0125864	0.0235116	0.0299939	0.0131395	0.0134237	0.0455505	0.0476738	0.0816442	0.0853433	0.071047	0.0687762	0.0733573	0.0739746		0.0418363	0.0396869	0.0400938	0.0374001	0.0505939	0.0539564	0.0703649	0.0738739	0.0307162
644	-8.99679e-07	0.000439377	0.0043832	0.00738758	0.000363847	0.00266108	0.0221816	0.0180261	0.021481	0.02146	0.0169814	0.0158933	0.0198738	0.0207672		0.0114151	0.0111123	0.00127312	0.000752091	0.0012426	0.00120305	0.00427699	0.00314837	0.0182703	0.0182337	0.0122422	0.0125138	0.0234117	0.0299093	0.0130583	0.0133467	0.0451454	0.047283	0.0810839	0.0846491	0.0705249	0.0682211	0.0728002	0.0733708		0.0417889	0.0396169	0.0399537	0.0372875	0.0504262	0.0538069	0.0702987	0.0737674	0.0305536
645	3.87077e-06	0.000439518	0.004369	0.00738166	0.000375387	0.00266836	0.0219322	0.017872	0.0214093	0.0213693	0.0169099	0.0158236	0.0197767	0.0206804		0.0113065	0.0110121	0.00125055	0.000736905	0.001225	0.00118787	0.00425437	0.0031116	0.0180538	0.0180086	0.0121686	0.0124435	0.0233096	0.029826	0.0129893	0.0132671	0.0447271	0.0468883	0.080521	0.083936	0.0700159	0.0676645	0.072266	0.0727745		0.0417495	0.0395543	0.0398286	0.0371728	0.0502788	0.0536578	0.0702375	0.0736664	0.0303876
646	1.05494e-05	0.000441786	0.00435485	0.00738046	0.000390172	0.00267931	0.0216081	0.0176748	0.0213366	0.0212703	0.016833	0.0157538	0.0196774	0.0205926		0.0111641	0.0108832	0.00122337	0.000719448	0.00120327	0.00117171	0.00422613	0.00307022	0.0178044	0.0177431	0.0120934	0.0123768	0.0231994	0.0297402	0.0129216	0.0131787	0.0442793	0.0464767	0.0799565	0.0831811	0.0695162	0.0670953	0.0717508	0.0721691		0.0417277	0.0394984	0.0397011	0.0370433	0.0501275	0.0534939	0.070188	0.073572	0.0302037
647	1.86601e-05	0.000445681	0.00434033	0.00738228	0.0004074	0.0026932	0.0212289	0.0174454	0.0212632	0.0211649	0.016752	0.0156842	0.0195767	0.0205041		0.0109963	0.0107326	0.00119271	0.000700205	0.00117839	0.00115486	0.00419357	0.00302532	0.0175315	0.0174485	0.0120172	0.0123128	0.0230833	0.0296527	0.0128551	0.0130838	0.0438108	0.0460534	0.0793914	0.0823971	0.0690247	0.0665178	0.071251	0.0715586		0.0417187	0.0394469	0.0395719	0.0369026	0.0499729	0.0533182	0.070146	0.0734814	0.0300058
648	2.77269e-05	0.000450704	0.00432504	0.00738545	0.000426268	0.00270932	0.0208138	0.017195	0.0211896	0.0210552	0.0166682	0.0156152	0.0194751	0.0204151		0.0108117	0.0105675	0.00115974	0.000679663	0.00115133	0.00113759	0.00415794	0.00297797	0.0172445	0.0171359	0.0119404	0.0122508	0.0229633	0.029564	0.0127897	0.012985	0.0433299	0.0456234	0.0788267	0.0815965	0.0685402	0.0659367	0.0707632	0.0709469		0.0417172	0.0393973	0.0394417	0.036754	0.0498158	0.0531339	0.0701071	0.0733918	0.0297979
649	3.72737e-05	0.000456355	0.00430854	0.00738829	0.000445973	0.00272695	0.0203822	0.0169346	0.0211159	0.0209431	0.0165832	0.015547	0.0193733	0.0203259		0.0106188	0.0103948	0.00112561	0.000658307	0.00112307	0.00112016	0.00412052	0.00292925	0.0169529	0.0168163	0.0118635	0.0121899	0.0228415	0.0294748	0.0127252	0.0128847	0.0428454	0.0451917	0.0782633	0.0807917	0.0680617	0.0653565	0.070284	0.0703381		0.0417181	0.0393471	0.039311	0.036601	0.0496571	0.052944	0.0700671	0.0733	0.0295838
650	4.68245e-05	0.000462133	0.00429045	0.00738912	0.000465714	0.00274536	0.0199534	0.0166752	0.0210426	0.0208306	0.0164983	0.01548	0.019272	0.0202367		0.0104263	0.0102218	0.00109147	0.000636625	0.00109458	0.00110285	0.0040826	0.00288024	0.0166658	0.0165008	0.0117868	0.0121293	0.0227199	0.0293859	0.0126616	0.0127853	0.0423656	0.0447632	0.0777024	0.0799953	0.0675879	0.0647817	0.06981	0.0697361		0.0417164	0.0392939	0.0391806	0.036447	0.0494976	0.0527516	0.0700217	0.0732034	0.0293674
651	5.59033e-05	0.000467539	0.00427033	0.00738626	0.000484686	0.00276385	0.0195466	0.0164278	0.02097	0.0207196	0.0164149	0.0154145	0.0191718	0.0201479		0.0102425	0.0100554	0.00105847	0.000615102	0.00106684	0.00108593	0.00404543	0.00283202	0.0163927	0.0162005	0.011711	0.0120683	0.0226006	0.0292978	0.0125988	0.0126893	0.0418992	0.044343	0.0771448	0.0792194	0.0671178	0.0642169	0.0693376	0.0691447		0.041707	0.0392351	0.0390511	0.0362954	0.0493379	0.0525597	0.0699667	0.0730988	0.0291527
652	6.40341e-05	0.000472072	0.00424779	0.00737802	0.000502089	0.00278169	0.0191808	0.0162034	0.0208983	0.0206122	0.0163344	0.0153507	0.0190734	0.0200595		0.0100761	0.00990266	0.00102776	0.000594225	0.00104083	0.00106968	0.00401031	0.00278566	0.0161427	0.0159263	0.0116363	0.0120059	0.0224857	0.0292112	0.0125366	0.0125993	0.0414544	0.0439361	0.0765916	0.0784764	0.0666501	0.0636667	0.0688636	0.0685681		0.0416847	0.0391682	0.0389231	0.0361496	0.049179	0.0523713	0.0698978	0.0729834	0.0289436
653	7.07407e-05	0.000475234	0.00422241	0.00736274	0.000517118	0.00279815	0.0188751	0.0160129	0.0208279	0.0205104	0.0162581	0.0152889	0.0189775	0.019972		0.00993555	0.00977062	0.00100051	0.000574479	0.00101753	0.00105435	0.0039785	0.00274223	0.0159253	0.0156893	0.0115632	0.0119414	0.0223772	0.0291268	0.0124749	0.0125175	0.0410397	0.0435473	0.0760436	0.0777783	0.0661838	0.0631355	0.0683843	0.0680102		0.0416446	0.0390909	0.0387974	0.0360131	0.0490215	0.0521895	0.0698107	0.0728543	0.028744
654	7.55472e-05	0.000476522	0.00419378	0.00733872	0.000528972	0.00281253	0.0186486	0.0158673	0.0207592	0.0204161	0.0161875	0.0152296	0.0188846	0.0198856		0.00982931	0.00966632	0.000977859	0.000556351	0.000997908	0.00104024	0.00395129	0.00270283	0.0157495	0.0155004	0.0114923	0.0118739	0.0222772	0.0290452	0.0124135	0.0124466	0.0406636	0.0431817	0.0755019	0.0771372	0.0657176	0.062628	0.0678965	0.0674749		0.0415814	0.0390007	0.0386745	0.0358893	0.0488663	0.0520175	0.0697012	0.0727085	0.0285578
655	7.96041e-05	0.000473694	0.00415968	0.00730377	0.000541552	0.00283431	0.0184667	0.0157526	0.0206953	0.0203299	0.016118	0.015171	0.0187929	0.0197928		0.00974372	0.00957381	0.000958601	0.000537815	0.000980678	0.00102857	0.00392837	0.00266886	0.0156026	0.0153446	0.011422	0.0118034	0.0221813	0.0289679	0.0123559	0.0123844	0.0403058	0.0428265	0.0749556	0.0765276	0.0652541	0.062133	0.0674114	0.0669599		0.0415039	0.0389002	0.0385592	0.0357707	0.0487201	0.051847	0.0695778	0.0725538	0.028372
656	8.42311e-05	0.000465927	0.00411924	0.00725852	0.000558319	0.00287038	0.0182842	0.0156465	0.0206379	0.0202499	0.0160448	0.0151118	0.0187006	0.0196885		0.0096598	0.00947438	0.000940533	0.000516975	0.00096381	0.00101979	0.00390803	0.00263987	0.0154651	0.0151992	0.011351	0.011731	0.0220842	0.028895	0.0123045	0.0123268	0.0399435	0.0424679	0.0743966	0.0759187	0.0647962	0.061638	0.0669407	0.0664589		0.0414238	0.0387943	0.0384538	0.0356484	0.0485864	0.0516693	0.0694515	0.0723988	0.0281738
657	8.92055e-05	0.000454855	0.00407402	0.00720554	0.000577805	0.00291612	0.0181042	0.0155478	0.0205852	0.0201743	0.0159696	0.0150529	0.0186081	0.0195768		0.00957805	0.00937091	0.000923321	0.000494516	0.000947167	0.00101299	0.00388935	0.00261416	0.0153366	0.0150633	0.0112795	0.0116572	0.0219868	0.0288252	0.0122576	0.0122728	0.0395805	0.0421089	0.0738299	0.075314	0.0643435	0.0611455	0.0664813	0.0659704		0.0413405	0.0386838	0.038355	0.0355239	0.0484607	0.0514862	0.069321	0.0722415	0.0279672
658	9.43048e-05	0.000442112	0.00402559	0.00714741	0.000598546	0.00296691	0.0179301	0.0154553	0.0205352	0.0201012	0.0158937	0.0149949	0.0185161	0.0194614		0.00949895	0.00926626	0.000906633	0.00047112	0.000930609	0.00100723	0.00387143	0.00259004	0.0152165	0.0149362	0.011208	0.0115829	0.0218897	0.0287573	0.0122137	0.0122216	0.0392211	0.0417525	0.0732606	0.0747174	0.0638957	0.0606577	0.0660301	0.0654925		0.0412533	0.0385694	0.0382595	0.0353983	0.0483388	0.0512997	0.0691855	0.07208	0.0277563
659	9.93063e-05	0.000429331	0.00397554	0.00708671	0.000619075	0.00301813	0.0177648	0.0153677	0.0204861	0.020029	0.0158185	0.0149385	0.0184252	0.0193463		0.00942301	0.0091633	0.000890132	0.000447471	0.000913999	0.0010016	0.00385336	0.00256578	0.0151044	0.014817	0.0111366	0.0115087	0.0217938	0.0286899	0.0121713	0.0121724	0.038869	0.0414016	0.0726936	0.0741325	0.0634523	0.060177	0.065584	0.0650237		0.0411615	0.0384517	0.0381641	0.0352732	0.0482164	0.0511117	0.069044	0.0719126	0.0275453
660	0.000103988	0.000418146	0.00392544	0.00702602	0.000637926	0.00306518	0.0176115	0.0152838	0.020436	0.0199557	0.0157456	0.0148846	0.0183358	0.0192353		0.00935072	0.00906488	0.000873487	0.000424252	0.000897199	0.000995185	0.00383425	0.00253971	0.0149998	0.0147049	0.0110659	0.0114354	0.0216997	0.0286218	0.012129	0.0121242	0.0385283	0.0410592	0.0721339	0.073563	0.063013	0.0597058	0.0651401	0.0645621		0.0410644	0.0383315	0.0380657	0.0351498	0.0480893	0.050924	0.0688953	0.0717372	0.0273381
661	0.000108126	0.000410191	0.00387685	0.00696791	0.000653633	0.00310342	0.0174733	0.0152023	0.0203829	0.0198797	0.0156764	0.0148337	0.0182486	0.0191323		0.00928259	0.00897387	0.000856362	0.000402148	0.000880069	0.000987065	0.00381318	0.0025101	0.0149023	0.0145991	0.0109961	0.0113637	0.0216083	0.0285517	0.012085	0.0120761	0.0382029	0.0407282	0.0715866	0.0730125	0.0625774	0.0592464	0.0646952	0.0641062		0.0409614	0.0382094	0.0379608	0.0350294	0.0479531	0.0507386	0.0687385	0.0715521	0.027139
662	0.000111499	0.0004071	0.00383136	0.00691496	0.000664729	0.00312824	0.0173533	0.015122	0.0203251	0.0197991	0.0156122	0.0147868	0.0181642	0.0190412		0.00921911	0.00889313	0.000838425	0.000381842	0.000862472	0.000976318	0.00378925	0.00247525	0.0148114	0.0144988	0.0109277	0.0112942	0.0215204	0.0284781	0.012038	0.0120274	0.0378967	0.0404116	0.0710564	0.0724846	0.0621452	0.0588012	0.0642462	0.0636541		0.0408519	0.0380862	0.0378464	0.0349136	0.0478035	0.0505574	0.0685725	0.0713553	0.0269519
663	0.000113883	0.000410506	0.00379054	0.00686976	0.000669749	0.00313503	0.0172548	0.0150417	0.0202605	0.0197121	0.0155547	0.0147445	0.018083	0.0189659		0.00916077	0.0088255	0.00081934	0.000364017	0.00084427	0.000962027	0.00376155	0.00243347	0.0147266	0.0144033	0.0108608	0.0112278	0.0214366	0.0284	0.0119863	0.011977	0.0376138	0.0401122	0.0705483	0.071983	0.0617159	0.0583724	0.0637902	0.0632043		0.040735	0.0379625	0.0377192	0.0348035	0.0476363	0.0503823	0.0683964	0.071145	0.026781
664	0.000115703	0.000417403	0.00375089	0.00682588	0.000671131	0.00313095	0.0171759	0.0149661	0.020193	0.0196231	0.0155012	0.0147059	0.018004	0.0188991		0.00910791	0.00876674	0.000799317	0.000347016	0.000825489	0.000945662	0.00373116	0.00238768	0.0146513	0.0143163	0.010795	0.011163	0.0213563	0.0283198	0.0119327	0.0119276	0.0373487	0.0398254	0.0700522	0.0715038	0.0612889	0.0579559	0.0633323	0.0627606		0.0406105	0.0378367	0.0375839	0.0346975	0.047458	0.0502101	0.0682107	0.070923	0.0266194
665	0.000117497	0.000423904	0.00370834	0.00677624	0.000672163	0.00312601	0.0171118	0.0148999	0.0201271	0.0195369	0.0154485	0.0146696	0.0179255	0.0188316		0.0090601	0.00871066	0.000778826	0.000328932	0.000806267	0.000929219	0.00369983	0.00234176	0.0145883	0.0142415	0.0107295	0.0110982	0.0212783	0.0282409	0.0118807	0.0118816	0.0370932	0.0395444	0.0695557	0.0710398	0.0608641	0.0575459	0.0628798	0.0623277		0.0404791	0.037707	0.0374474	0.034593	0.0472781	0.0500365	0.0680172	0.0706926	0.0264579
666	0.000119215	0.000430325	0.00366361	0.00672233	0.00067265	0.00311985	0.0170606	0.0148414	0.0200625	0.0194526	0.0153969	0.0146355	0.0178478	0.0187641		0.00901672	0.00865722	0.000757931	0.000310073	0.000786634	0.000912572	0.00366775	0.0022954	0.014536	0.0141771	0.0106643	0.0110335	0.0212021	0.0281628	0.0118303	0.0118385	0.0368471	0.0392699	0.0690606	0.0705902	0.0604423	0.057143	0.0624324	0.0619048		0.0403413	0.0375738	0.0373096	0.0344898	0.0470964	0.0498618	0.0678166	0.0704545	0.0262972
667	0.000120807	0.000436984	0.00361741	0.00666568	0.000672402	0.00311212	0.0170206	0.0147887	0.0199986	0.0193695	0.0153464	0.0146034	0.0177712	0.0186975		0.00897716	0.00860634	0.000736694	0.000290748	0.000766617	0.000895592	0.00363508	0.0022483	0.0144927	0.0141216	0.0105995	0.0109693	0.0211277	0.0280852	0.0117813	0.0117975	0.0366102	0.0390021	0.0685684	0.070154	0.0600242	0.0567476	0.0619898	0.0614911		0.0401979	0.0374377	0.0371705	0.0343877	0.0469129	0.0496863	0.0676095	0.0702091	0.026138
668	0.000122224	0.000444197	0.00357045	0.00660781	0.000671224	0.00310246	0.01699	0.0147402	0.0199349	0.0192866	0.0152975	0.0145733	0.017696	0.0186328		0.00894079	0.00855799	0.000715178	0.000271264	0.000746246	0.000878152	0.00360197	0.00220015	0.0144568	0.0140734	0.010535	0.0109057	0.0210547	0.0280076	0.0117336	0.0117581	0.036382	0.0387416	0.0680807	0.0697304	0.0596107	0.0563603	0.0615519	0.061086		0.0400496	0.0372993	0.0370301	0.0342867	0.0467274	0.0495101	0.0673967	0.0699568	0.0259809
669	0.000123417	0.000452279	0.00352344	0.00655022	0.000668924	0.00309051	0.0169669	0.0146941	0.0198708	0.0192031	0.0152504	0.0145449	0.0176223	0.0185706		0.00890699	0.00851211	0.000693446	0.00025193	0.000725549	0.000860123	0.00356861	0.00215067	0.0144267	0.014031	0.0104709	0.010843	0.020983	0.0279297	0.0116871	0.0117194	0.0361623	0.0384889	0.0675993	0.0693185	0.0592024	0.0559816	0.0611184	0.0606886		0.039897	0.037159	0.0368884	0.0341865	0.0465399	0.0493336	0.0671787	0.0696983	0.0258267
670	0.000124335	0.000461549	0.00347708	0.00649444	0.000665309	0.00307591	0.0169497	0.0146488	0.0198059	0.019118	0.0152052	0.0145181	0.0175504	0.018512		0.00887513	0.00846863	0.00067156	0.000233054	0.000704556	0.000841379	0.00353516	0.00209953	0.0144008	0.0139928	0.0104073	0.0107813	0.0209124	0.0278509	0.0116417	0.0116809	0.0359509	0.0382442	0.0671257	0.0689173	0.0588002	0.055612	0.0606891	0.0602982		0.0397408	0.0370173	0.0367454	0.0340871	0.0463501	0.049157	0.0669564	0.0694338	0.0256759
671	0.000124929	0.000472321	0.0034321	0.00644198	0.000660186	0.0030583	0.0169364	0.0146025	0.0197397	0.0190306	0.0151622	0.0144927	0.0174805	0.0184576		0.00884461	0.00842751	0.000649583	0.000214944	0.000683295	0.000821791	0.00350179	0.00204645	0.0143775	0.0139572	0.0103441	0.0107209	0.0208426	0.027771	0.0115973	0.0116418	0.0357474	0.0380081	0.0666616	0.0685261	0.0584048	0.0552519	0.0602638	0.0599141		0.0395817	0.0368748	0.036601	0.0339882	0.0461581	0.0489806	0.0667303	0.0691641	0.0255294
672	0.00012515	0.000484913	0.0033892	0.00639437	0.000653363	0.00303733	0.0169254	0.0145534	0.0196716	0.0189399	0.0151217	0.0144687	0.0174129	0.0184085		0.00881479	0.0083887	0.000627578	0.000197908	0.000661794	0.000801231	0.00346866	0.00199113	0.0143551	0.0139226	0.0102814	0.010662	0.0207733	0.0276896	0.0115537	0.0116015	0.0355515	0.0377811	0.0662084	0.0681438	0.058017	0.0549018	0.0598421	0.0595355		0.0394204	0.036732	0.0364552	0.0338898	0.0459636	0.0488046	0.0665013	0.0688895	0.0253876
673	0.000124948	0.00049964	0.0033491	0.0063531	0.000644646	0.00301263	0.0169148	0.0144999	0.0196012	0.0188451	0.0150839	0.0144459	0.0173479	0.0183653		0.00878507	0.00835213	0.000605607	0.000182254	0.000640083	0.000779572	0.00343594	0.00193325	0.0143321	0.0138875	0.0102192	0.0106048	0.0207044	0.0276061	0.0115109	0.0115593	0.0353631	0.0375634	0.0657679	0.0677697	0.0576376	0.0545623	0.059424	0.0591617		0.0392576	0.0365893	0.036308	0.0337917	0.0457666	0.0486292	0.0662698	0.0686105	0.0252514
674	0.000124522	0.000515611	0.0033105	0.00631537	0.000634574	0.00298511	0.0169057	0.0144447	0.0195299	0.0187483	0.0150483	0.0144244	0.0172849	0.0183259		0.00875588	0.00831664	0.000583137	0.000167059	0.000617748	0.000756922	0.0034034	0.00187326	0.0143107	0.0138542	0.0101574	0.0105491	0.0206362	0.0275216	0.0114701	0.0115165	0.0351814	0.0373545	0.0653364	0.0674039	0.0572656	0.0542318	0.0590117	0.0587946		0.0390922	0.0364467	0.0361598	0.0336939	0.0455685	0.0484538	0.0660361	0.0683266	0.0251194
675	0.000124061	0.00053185	0.00327169	0.00627747	0.000623738	0.0029558	0.0169009	0.0143917	0.0194593	0.0186521	0.015014	0.0144046	0.0172234	0.0182877		0.00872829	0.00828153	0.000559754	0.000151345	0.000594492	0.000733514	0.00337069	0.00181184	0.0142945	0.0138261	0.0100957	0.0104944	0.0205691	0.0274373	0.0114321	0.0114746	0.0350063	0.0371532	0.0649096	0.0670475	0.0568993	0.0539087	0.0586071	0.0584365		0.0389226	0.0363034	0.0360111	0.0335965	0.0453702	0.0482776	0.0657991	0.068037	0.0249902
676	0.0001235	0.000548554	0.00323273	0.0062396	0.000612017	0.00292455	0.0169014	0.014341	0.0193891	0.0185559	0.0149812	0.0143864	0.0171634	0.018251		0.00870262	0.00824749	0.000535695	0.000135342	0.000570517	0.000709406	0.0033378	0.00174901	0.0142837	0.0138034	0.0100342	0.0104407	0.0205031	0.027353	0.0113965	0.0114337	0.0348385	0.0369595	0.0644879	0.0667011	0.0565387	0.0535933	0.058209	0.0580869		0.0387488	0.036159	0.0358616	0.0334998	0.0451713	0.0481007	0.0655584	0.0677413	0.0248636
677	0.000122772	0.000565919	0.0031937	0.00620196	0.000599294	0.00289122	0.0169083	0.0142924	0.0193189	0.0184595	0.01495	0.0143699	0.0171049	0.0182165		0.00867918	0.0082152	0.0005112	0.000119278	0.000546025	0.000684654	0.00330473	0.00168481	0.0142783	0.0137861	0.00997306	0.0103879	0.0204384	0.0272685	0.0113626	0.0113936	0.0346784	0.0367734	0.0640718	0.0663655	0.0561836	0.0532861	0.0578165	0.0577454		0.0385709	0.0360132	0.035711	0.0334038	0.0449711	0.0479232	0.0653133	0.0674396	0.0247399
678	0.000121813	0.00058414	0.00315466	0.00616473	0.000585449	0.00285567	0.0169225	0.0142462	0.0192484	0.0183624	0.0149206	0.0143551	0.017048	0.0181846		0.00865826	0.00818533	0.000486507	0.000103385	0.000521219	0.000659317	0.00327146	0.0016193	0.0142786	0.0137745	0.00991233	0.010336	0.0203748	0.0271836	0.01133	0.0113543	0.0345267	0.0365949	0.063662	0.0660411	0.0558339	0.0529875	0.0574284	0.0574116		0.0383888	0.0358655	0.0355593	0.0333086	0.0447689	0.0477454	0.0650632	0.0671317	0.0246189
679	0.000120555	0.000603413	0.00311569	0.00612812	0.000570365	0.00281773	0.016945	0.0142023	0.0191771	0.0182641	0.014893	0.0143419	0.0169926	0.0181558		0.00864018	0.00815857	0.000461855	8.78904e-05	0.0004963	0.000633452	0.003238	0.00155249	0.0142845	0.0137686	0.00985211	0.0102849	0.0203126	0.0270981	0.011298	0.0113156	0.0343838	0.036424	0.0632588	0.0657287	0.0554895	0.0526979	0.0570437	0.0570851		0.0382025	0.0357156	0.0354062	0.0332144	0.0445642	0.0475675	0.0648075	0.0668174	0.0245008
680	0.000118933	0.000623935	0.00307686	0.00609232	0.000553923	0.00277727	0.016977	0.0141608	0.0191048	0.0181643	0.0148674	0.0143304	0.0169389	0.0181306		0.00862524	0.00813559	0.000437484	7.30248e-05	0.000471472	0.000607116	0.00320433	0.00148444	0.0142964	0.0137685	0.00979247	0.0102345	0.0202516	0.0270119	0.0112662	0.0112776	0.0342504	0.0362606	0.0628628	0.0654287	0.0551504	0.0524177	0.0566613	0.0567655		0.038012	0.0355631	0.0352515	0.0331212	0.0443563	0.0473895	0.0645456	0.0664966	0.0243855
681	0.000116881	0.0006459	0.00303823	0.00605754	0.000536004	0.00273414	0.0170193	0.0141217	0.019031	0.0180625	0.0148439	0.0143206	0.0168868	0.0181094		0.00861376	0.00811707	0.000413632	5.90175e-05	0.000446937	0.000580366	0.00317044	0.00141519	0.0143142	0.0137745	0.0097335	0.0101847	0.0201918	0.0269247	0.011234	0.01124	0.0341269	0.0361049	0.0624745	0.0651419	0.0548163	0.0521474	0.05628	0.0564523		0.0378174	0.0354076	0.0350951	0.0330292	0.0441448	0.0472118	0.0642769	0.0661693	0.0242732
682	0.000114333	0.000669505	0.00299987	0.00602395	0.000516489	0.00268818	0.017073	0.014085	0.0189555	0.0179585	0.0148225	0.0143125	0.0168363	0.0180928		0.00860604	0.00810371	0.000390537	4.60979e-05	0.000422896	0.000553261	0.00313633	0.00134477	0.0143382	0.0137865	0.0096753	0.0101356	0.0201335	0.0268365	0.0112008	0.0112029	0.034014	0.0359567	0.0620943	0.0648689	0.0544871	0.0518872	0.0558989	0.0561452		0.0376185	0.0352488	0.0349366	0.0329384	0.0439288	0.0470344	0.0640008	0.0658352	0.0241639
683	0.000111351	0.000694616	0.00296176	0.00599144	0.00049548	0.00263954	0.0171371	0.0140506	0.0188785	0.0178524	0.0148034	0.0143062	0.0167876	0.0180804		0.00860173	0.00809484	0.000367995	3.40857e-05	0.000399178	0.000525753	0.00310198	0.00127311	0.0143681	0.0138044	0.00961775	0.0100871	0.0200764	0.0267473	0.0111671	0.0111662	0.0339111	0.0358161	0.0617219	0.0646089	0.054163	0.0516369	0.0555189	0.0558444		0.0374156	0.035087	0.0347763	0.0328488	0.0437088	0.0468572	0.0637179	0.0654945	0.0240576
684	0.000108039	0.000720963	0.00292381	0.00595973	0.000473158	0.00258845	0.0172098	0.0140183	0.0188006	0.0177448	0.0147862	0.0143018	0.0167405	0.0180717		0.00860028	0.00808938	0.000345631	2.26411e-05	0.000375469	0.000497757	0.0030674	0.00120012	0.0144037	0.0138279	0.00956068	0.0100394	0.0200205	0.0266573	0.0111338	0.0111301	0.0338172	0.0356831	0.0613563	0.0643608	0.0538441	0.0513959	0.0551415	0.0555506		0.0372085	0.0349229	0.0346141	0.0327602	0.0434856	0.0466799	0.0634294	0.0651474	0.0239543
685	0.000104402	0.00074854	0.00288602	0.00592882	0.000449528	0.00253491	0.0172911	0.013988	0.0187218	0.0176359	0.014771	0.0142991	0.0166952	0.0180666		0.00860168	0.0080873	0.000323437	1.17546e-05	0.000351762	0.000469269	0.00303258	0.0011258	0.014445	0.013857	0.00950409	0.00999255	0.0199659	0.0265666	0.0111008	0.0110945	0.0337324	0.0355578	0.0609975	0.0641247	0.0535303	0.0511641	0.0547669	0.0552639		0.0369975	0.0347565	0.0344501	0.0326726	0.0432591	0.0465024	0.0631351	0.0647939	0.0238539
686	0.000100441	0.000777342	0.00284838	0.00589868	0.000424593	0.00247892	0.0173811	0.0139598	0.0186421	0.0175256	0.0147578	0.0142983	0.0166516	0.0180651		0.00860592	0.00808859	0.000301403	1.41685e-06	0.000328048	0.000440287	0.00299751	0.00105015	0.0144921	0.0138916	0.00944798	0.00994643	0.0199126	0.0264753	0.0110682	0.0110595	0.0336567	0.0354401	0.0606454	0.0639004	0.0532216	0.0509416	0.0543951	0.0549842		0.0367823	0.0345879	0.0342843	0.032586	0.0430294	0.0463247	0.0628352	0.0644341	0.0237565
687	9.61596e-05	0.000807361	0.00281089	0.0058693	0.000398358	0.00242047	0.0174797	0.0139336	0.0185615	0.0174139	0.0147466	0.0142994	0.0166097	0.0180672		0.00861299	0.00809322	0.000279518	-8.38175e-06	0.000304319	0.000410809	0.00296219	0.000973156	0.0145448	0.0139318	0.00939234	0.00990109	0.0198605	0.0263832	0.011036	0.011025	0.03359	0.03533	0.0603	0.0636879	0.0529181	0.0507283	0.0540261	0.0547115		0.0365632	0.034417	0.0341168	0.0325003	0.0427966	0.0461469	0.0625296	0.0640679	0.0236621
688	9.15608e-05	0.000838593	0.00277354	0.00584067	0.000370827	0.00235957	0.0175869	0.0139096	0.0184801	0.0173009	0.0147374	0.0143023	0.0165695	0.0180729		0.00862289	0.00810117	0.000257772	-1.76507e-05	0.000280567	0.000380832	0.00292662	0.000894823	0.0146033	0.0139776	0.00933717	0.00985654	0.0198097	0.0262904	0.0110042	0.0109911	0.0335322	0.0352275	0.0599612	0.0634873	0.0526197	0.0505242	0.05366	0.054446		0.0363399	0.0342438	0.0339474	0.0324157	0.0425605	0.0459689	0.0622183	0.0636952	0.0235707
689	8.66472e-05	0.00087103	0.00273633	0.00581278	0.000342003	0.00229622	0.0177027	0.0138877	0.0183978	0.0171865	0.0147302	0.0143071	0.016531	0.0180822		0.00863561	0.00811243	0.000236157	-2.63994e-05	0.000256784	0.000350354	0.00289079	0.000815147	0.0146675	0.014029	0.00928247	0.00981279	0.0197601	0.026197	0.0109728	0.0109578	0.0334835	0.0351326	0.0596291	0.0632985	0.0523265	0.0503292	0.0532968	0.0541875		0.0361126	0.0340684	0.0337762	0.032332	0.0423213	0.0457907	0.0619014	0.0633162	0.0234823
690	8.14216e-05	0.000904667	0.00269926	0.00578562	0.000311892	0.00223041	0.017827	0.0138679	0.0183147	0.0170709	0.0147249	0.0143138	0.0164943	0.018095		0.00865115	0.00812698	0.000214661	-3.46374e-05	0.00023296	0.000319374	0.00285469	0.000734126	0.0147375	0.0140861	0.00922823	0.00976982	0.0197117	0.0261028	0.0109418	0.010925	0.0334438	0.0350453	0.0593035	0.0631214	0.0520384	0.0501434	0.0529366	0.0539362		0.0358812	0.0338907	0.0336033	0.0322494	0.0420789	0.0456123	0.0615788	0.0629308	0.0233969
691	7.58867e-05	0.000939499	0.00266231	0.00575916	0.000280496	0.00216215	0.01796	0.0138503	0.0182308	0.0169539	0.0147216	0.0143223	0.0164592	0.0181113		0.00866949	0.0081448	0.000193276	-4.23743e-05	0.000209089	0.000287887	0.00281833	0.000651756	0.0148133	0.0141487	0.00917446	0.00972764	0.0196647	0.026008	0.0109113	0.0108929	0.033413	0.0349655	0.0589844	0.0629561	0.0517554	0.0499668	0.0525793	0.053692		0.0356456	0.0337108	0.0334286	0.0321677	0.0418334	0.0454337	0.0612506	0.062539	0.0233144
692	7.00455e-05	0.000975518	0.00262549	0.0057334	0.000247821	0.00209143	0.0181015	0.0138348	0.0181461	0.0168357	0.0147203	0.0143327	0.0164259	0.0181311		0.00869063	0.00816587	0.00017199	-4.96194e-05	0.000185162	0.000255893	0.00278169	0.000568035	0.0148948	0.014217	0.00912114	0.00968625	0.0196188	0.0259126	0.0108813	0.0108613	0.0333912	0.0348934	0.0586719	0.0628025	0.0514776	0.0497993	0.0522251	0.053455		0.035406	0.0335287	0.0332521	0.032087	0.0415848	0.045255	0.0609168	0.0621408	0.0232349
693	6.39007e-05	0.00101272	0.00258878	0.00570832	0.00021387	0.00201825	0.0182515	0.0138214	0.0180606	0.0167162	0.0147209	0.014345	0.0163942	0.0181544		0.00871457	0.00819016	0.000150796	-5.63823e-05	0.000161171	0.000223388	0.00274478	0.000482961	0.0149821	0.0142909	0.00906828	0.00964566	0.0195743	0.0258165	0.0108518	0.0108304	0.0333782	0.0348287	0.0583657	0.0626606	0.0512049	0.0496409	0.0518739	0.0532252		0.0351623	0.0333444	0.0330738	0.0320073	0.041333	0.045076	0.0605774	0.0617361	0.0231584
694	5.74552e-05	0.0010511	0.00255219	0.00568392	0.000178647	0.00194261	0.0184101	0.0138102	0.0179743	0.0165956	0.0147235	0.0143591	0.0163643	0.0181812		0.00874129	0.00821767	0.000129681	-6.26724e-05	0.000137107	0.00019037	0.00270759	0.000396531	0.0150752	0.0143705	0.00901587	0.00960586	0.019531	0.0257197	0.0108229	0.0108	0.0333743	0.0347717	0.058066	0.0625303	0.0509374	0.0494917	0.0515258	0.0530025		0.0349145	0.0331579	0.0328937	0.0319286	0.0410782	0.0448969	0.0602323	0.0613251	0.0230848
695	5.07116e-05	0.00109064	0.00251571	0.00566016	0.000142156	0.00186452	0.0185773	0.0138013	0.0178873	0.0164737	0.0147281	0.0143752	0.016336	0.0182114		0.0087708	0.00824837	0.000108637	-6.84993e-05	0.000112963	0.000156837	0.00267011	0.000308743	0.0151742	0.0144558	0.00896391	0.00956686	0.019489	0.0256223	0.0107944	0.0107703	0.0333792	0.0347222	0.0577726	0.0624117	0.0506749	0.0493515	0.0511808	0.0527871		0.0346625	0.0329692	0.0327119	0.0318508	0.0408203	0.0447175	0.0598817	0.0609076	0.0230143
696	4.36729e-05	0.00113135	0.00247934	0.00563706	0.000104402	0.00178397	0.0187529	0.0137945	0.0177995	0.0163506	0.0147345	0.0143932	0.0163095	0.018245		0.00880307	0.00828225	8.76539e-05	-7.38725e-05	8.87297e-05	0.000122786	0.00263234	0.000219593	0.015279	0.0145467	0.0089124	0.00952866	0.0194483	0.0255242	0.0107665	0.0107412	0.033393	0.0346802	0.0574855	0.0623048	0.0504177	0.0492204	0.0508391	0.052579		0.0344064	0.0327783	0.0325283	0.0317741	0.0405594	0.0445379	0.0595255	0.0604837	0.0229467
697	3.63419e-05	0.00117322	0.00244306	0.00561457	6.53887e-05	0.00170096	0.0189371	0.0137899	0.017711	0.0162264	0.014743	0.014413	0.0162846	0.0182821		0.00883812	0.00831928	6.67215e-05	-7.88014e-05	6.43994e-05	8.8216e-05	0.00259428	0.000129079	0.0153896	0.0146433	0.00886133	0.00949125	0.0194088	0.0254256	0.0107392	0.0107127	0.0334157	0.0346458	0.0572047	0.0622094	0.0501655	0.0490983	0.0505005	0.0523781		0.0341462	0.0325853	0.0323429	0.0316984	0.0402954	0.0443581	0.0591638	0.0600534	0.022882
698	2.87213e-05	0.00121624	0.00240688	0.00559271	2.512e-05	0.00161548	0.0191299	0.0137875	0.0176218	0.016101	0.0147533	0.0144348	0.0162615	0.0183225		0.00887592	0.00835945	4.583e-05	-8.32956e-05	3.99639e-05	5.31234e-05	0.00255591	3.71991e-05	0.015506	0.0147456	0.0088107	0.00945465	0.0193706	0.0253263	0.0107125	0.0106848	0.0334473	0.0346189	0.0569302	0.0621256	0.0499185	0.0489853	0.0501652	0.0521845		0.0338818	0.0323901	0.0321557	0.0316236	0.0400284	0.0441781	0.0587965	0.0596167	0.0228204
699	2.08139e-05	0.0012604	0.00237079	0.00557145	-1.64e-05	0.00152755	0.0193311	0.0137873	0.0175319	0.0159745	0.0147656	0.0144584	0.01624	0.0183664		0.00891648	0.00840274	2.49696e-05	-8.73644e-05	1.54149e-05	1.7506e-05	0.00251725	-5.60502e-05	0.0156284	0.0148536	0.0087605	0.00941885	0.0193337	0.0252264	0.0106863	0.0106576	0.0334877	0.0345995	0.0566618	0.0620534	0.0496766	0.0488813	0.0498331	0.0519982		0.0336133	0.0321928	0.0319668	0.0315498	0.0397584	0.0439979	0.0584236	0.0591735	0.0227617
700	1.26227e-05	0.00130571	0.00233478	0.00555077	-5.91671e-05	0.00143715	0.0195408	0.0137894	0.0174413	0.0158469	0.0147799	0.014484	0.0162202	0.0184135		0.00895979	0.00844914	4.13034e-06	-9.10175e-05	-9.25583e-06	-1.86383e-05	0.00247828	-0.000150671	0.0157566	0.0149673	0.00871074	0.00938385	0.019298	0.0251258	0.0106608	0.0106311	0.033537	0.0345877	0.0563996	0.0619927	0.0494398	0.0487863	0.0495044	0.0518192		0.0333406	0.0319933	0.0317761	0.031477	0.0394854	0.0438174	0.0580452	0.0587239	0.022706
[truncated: 15 more columns]
