# Supplementary material for: Structural color in Junonia butterflies evolves by tuning scale lamina thickness
Source: eLife. 2020 Apr 7;9:e52187. doi: 10.7554/eLife.52187 (PMC7138606; doi:10.7554/eLife.52187)
Supplement: Supplementary file 1. [file elife-52187-supp1.xlsx]

## Sheet: specimens
Supplementary File 1. Butterfly specimens used in this study.
Genus	Species	Sex	Sample_origin	Notes	SpecimenID_Fig8	Color_cluster_Fig8	Lamina color in cover scales	Pigment in cover scales
Junonia	almana	F	Mindoro; Philippines		J. almana	gold	gold	orange
Junonia	atlites	M	Greater Sunda Islands; Sulawesi; Decmber 2006; Bioquip catalog #20B2293		J. atlites	NA (rainbow)	gradient of gold, copper, magenta, indigo, blue within each scale	generally none. the occasional scale has very slight brown
Junonia	coenia	M	Middle Island, Cool, California; May 2008; collector Chris Garcia	thickness and pigmentation measured in Fig. 1,3,7,8. I2 in Fig 1 source data	J. coen. WT	gold	gold	dark brown, only in ridges + ribs
Junonia	coenia	M	reared; Rachel Thayer; UC Berkeley; egg laid by wild-collected female from Richmond, CA; December 2014; #102.1	pigmentation measured in Fig. 3	NA	NA	gold	dark brown, only in ridges + ribs
Junonia	coenia	M	reared; Rachel Thayer; UC Berkeley; ordered from Shady Oak butterfly farm (Brooker, FL, USA); October 2014; #00043	thickness, pigmentation, reflectance measured in Fig.s 1,2,3,4,7,8. I5 in Fig 1 source data	J. coen. AS	indigo	indigo	dark brown, only in ridges + ribs
Junonia	coenia	M	reared; Rachel Thayer; UC Berkeley; ordered from Shady Oak butterfly farm (Brooker, FL, USA); June 2015; #132	pigmentation measured in Fig. 3	NA	NA	blue	dark brown, only in ridges + ribs
Junonia	coenia	F	reared; Rachel Thayer; UC Berkeley; second generation in-lab from Shady Oak population (Brooker, FL, USA); July 2015; #140	thickness and pigmentation measured in Fig.s 1,3. I6 in Fig 1 source data	NA	NA	blue	dark brown, only in ridges + ribs
Junonia	coenia		reared; Ryan Null; Marine Biological Laboratory; ordered from Shady Oak butterfly farm (Brooker, FL, USA); June 2014; forewing	thickness measured in Fig. 1 (I7)	NA	NA	blue	dark brown, only in ridges + ribs
Junonia	coenia		reared; Ryan Null; Marine Biological Laboratory; ordered from Shady Oak butterfly farm (Brooker, FL, USA); June 2014	thickness measured in Fig. 1 (I3)	NA	NA	gold	dark brown, only in ridges + ribs
Junonia	coenia		reared; Rachel Thayer; UC Berkeley; shipped as eggs from Karin van der Burg CornellU; June 2015; forewing	thickness measured in Fig. 1 (I4)	NA	NA	gold	dark brown, only in ridges + ribs
Junonia	coenia	M	reared; Rachel Thayer; UC Berkeley; shipped as eggs from Karin van der Burg CornellU; July 2015; #126.41	WT thickness, reflectance, and pigmentation in Fig. 1,2,3,4,8. I1 in Fig. 1 source data.	J. coen. WT	gold	gold	dark brown, only in ridges + ribs
Junonia	coenia	M	reared; Linlin Zhang; CornellU; OptixKO-M30	Used for Fig. 1,2,4, and dorsal hindwing and discal bars in Fig. 5,6	J. coen. mKO	blue	teal	dark brown, only in ridges + ribs
Junonia	coenia	M	reared; Linlin Zhang; CornellU; OptixKO-M61	Used for ventral hindwing in Fig. 5,6	NA	NA	very light white-gold to gold (wild-type regions). gold to copper (mutant regions)	dark brown, only in ridges + ribs. less in wild-type regions than mutant regions
Junonia	evarete complex	M	Coroico; Bolivia; Caranavi 11-12/2000; 700m; collector W. Zöller.	Labeled as Precis lavinia. Dark ventral antenna club. Fig. 1,2,3,7,8.	J. evar. blue	indigo	indigo	dark brown, only in ridges + ribs
Junonia	evarete complex	M	Jamaica; Middlesex County; Manchester Parish; III-1980; Bioquip catalog #20B0320	labeled as J. genoveva neildi. Light ventral antenna club. Fig. 1,2,3,7,8.	J. evar. brown	gold	gold	dark brown, only in ridges + ribs
Junonia	evarete complex	M	unknown; collected prior to September 2014.	Light ventral antenna club. Fig. 7,8.	J. evar. green	green	green	dark brown, only in ridges + ribs
Junonia	hierta	M	Thailand (same specimen as yellow patch)		J. hier. M	indigo	indigo	none
Junonia	hierta	M	Thailand (same specimen as blue patch)		J. hier. yellow	gold	gold/yellow	yellow, more in distal part of scale
Precis	octavia	M	Tanzania; Tanga Region Amani Forest; October 2014	dry season	P. oct. DS	indigo	variable between adjacent scales, ranges from indigo to teal	slight amount of brown, ridges+ribs only
Precis	octavia	M	Tanzania; Tanga Region Amani Forest; October 2014	wet season	P. oct. WS	green	teal	red, only in ridges + ribs
Precis	octavia	M	reared ex ova; N. Bonkewitz	dry season	P. oct. red band	red	variable between scales and somewhat distal to proximal. Can be copper, magenta, or purple	lots of red
Junonia	oenone	F	Madagascar; Antananarivo province; Analamanga Region; V-2003; Bioquip catalog #20B0340	labeled as P. oenone epiclelia	J. oen. F	red	variable; copper, magenta, or purple	lots of very dark brown/black
Junonia	oenone	M	Madagascar; Antananarivo province; Analamanga Region; V-2003; Bioquip catalog #20B0340	labeled as P. oenone epiclelia	J. oen. M	indigo	indigo	none
Junonia	orithya	F	reared; Masaki Iwata; U of Ryukyus; No. 29; 08.12/1 ~ 12/9		J. orit. brown	gold	gold	dark brown, only in ridges + ribs
Junonia	orithya	F	Marinduque; Philippines		J. orit. F teal	blue	teal	dark brown, only in ridges + ribs
Junonia	orithya	M	Malaysia		J. orit. M	indigo	indigo	dark brown, only in ridges + ribs
Junonia	rhadama	F	Madagascar; February 2016		J. rhad. F	gold	gold	dark brown, only in ridges + ribs
Junonia	rhadama	M	Madagascar; January 2016		J. rhad. M	blue	blue	slight brown, only in ridges + ribs
Junonia	westermanni	M	Central Af Repub; Region de Bambiri; May 2016		J. west. blue	indigo	indigo	none
Junonia	westermanni	M	Central Republic Congo		J. west. orange	gold	gold	orange
Junonia	westermanni	F	Central African Republic		NA	NA	blue to indigo	red-orange
